# Supplementary material for: A diurnal flux balance model of Synechocystis sp. PCC 6803 metabolism
Source: PLoS Comput Biol. 2019 Jan 24;15(1):e1006692. doi: 10.1371/journal.pcbi.1006692 (PMC6364703; doi:10.1371/journal.pcbi.1006692)
Supplement: S2 Table — (XLSX) [file pcbi.1006692.s002.xlsx]

## Sheet: BoundHts_Fixed_0.04tol_Cyanofix
Reaction ID	Reaction Name	EC number	GPR	Reaction Description	Pathway
rxn00902_tpm1	3-Carboxy-3-hydroxy-4-methylpentanoate 3-methyl-2-oxobutanoate-lyase	4.1.3.12	(sll1564) or (slr0186)	(1) H2O[c] + (1) Acetyl-CoA[c] + (1) 3-Methyl-2-oxobutanoate[c] --> (1) CoA[c] + (1) H+[c] + (1) 2-Isopropylmalate[c]	Pyruvate metabolism, Valine,leucine and isoleucine biosynthesis
rxn06433_tpm3	L-Aspartate:tRNAAsp ligase (AMP-forming)	6.1.1.23	slr1720	(1) ATP[c] + (1) L-Aspartate[c] + (1) tRNA(Asn)[c] + (2) H+[c] <=> (1) PPi[c] + (1) AMP[c] + (1) Asp-tRNA(Asn)[c]	Alanine and aspartate metabolism
rxn06433_tpm4	L-Aspartate:tRNAAsp ligase (AMP-forming)	6.1.1.23	slr1720	(1) ATP[c] + (1) L-Aspartate[c] + (1) tRNA(Asn)[c] + (2) H+[c] <=> (1) PPi[c] + (1) AMP[c] + (1) Asp-tRNA(Asn)[c]	Alanine and aspartate metabolism
rxn06433_tpm2	L-Aspartate:tRNAAsp ligase (AMP-forming)	6.1.1.23	slr1720	(1) ATP[c] + (1) L-Aspartate[c] + (1) tRNA(Asn)[c] + (2) H+[c] <=> (1) PPi[c] + (1) AMP[c] + (1) Asp-tRNA(Asn)[c]	Alanine and aspartate metabolism
rxn06433_tpm1	L-Aspartate:tRNAAsp ligase (AMP-forming)	6.1.1.23	slr1720	(1) ATP[c] + (1) L-Aspartate[c] + (1) tRNA(Asn)[c] + (2) H+[c] <=> (1) PPi[c] + (1) AMP[c] + (1) Asp-tRNA(Asn)[c]	Alanine and aspartate metabolism
rxn00527_tpm3	L-Tyrosine:2-oxoglutarate aminotransferase	2.6.1.5	(sll0402 or sll0480 or slr0036 or sll1713 or sll1958)	(1) 2-Oxoglutarate[c] + (1) L-Tyrosine[c] <=> (1) L-Glutamate[c] + (1) p-hydroxyphenylpyruvate[c]	Alkaloid biosynthesis I, Novobiocin biosynthesis, Tyrosine metabolism, Phenylalanine,tyrosine and tryptophan biosynthesis
rxn00527_tpm2	L-Tyrosine:2-oxoglutarate aminotransferase	2.6.1.5	(sll0402 or sll0480 or slr0036 or sll1713 or sll1958)	(1) 2-Oxoglutarate[c] + (1) L-Tyrosine[c] <=> (1) L-Glutamate[c] + (1) p-hydroxyphenylpyruvate[c]	Alkaloid biosynthesis I, Novobiocin biosynthesis, Tyrosine metabolism, Phenylalanine,tyrosine and tryptophan biosynthesis
rxn00527_tpm6	L-Tyrosine:2-oxoglutarate aminotransferase	2.6.1.5	(sll0402 or sll0480 or slr0036 or sll1713 or sll1958)	(1) 2-Oxoglutarate[c] + (1) L-Tyrosine[c] <=> (1) L-Glutamate[c] + (1) p-hydroxyphenylpyruvate[c]	Alkaloid biosynthesis I, Novobiocin biosynthesis, Tyrosine metabolism, Phenylalanine,tyrosine and tryptophan biosynthesis
rxn00527_tpm5	L-Tyrosine:2-oxoglutarate aminotransferase	2.6.1.5	(sll0402 or sll0480 or slr0036 or sll1713 or sll1958)	(1) 2-Oxoglutarate[c] + (1) L-Tyrosine[c] <=> (1) L-Glutamate[c] + (1) p-hydroxyphenylpyruvate[c]	Alkaloid biosynthesis I, Novobiocin biosynthesis, Tyrosine metabolism, Phenylalanine,tyrosine and tryptophan biosynthesis
rxn00527_tpm4	L-Tyrosine:2-oxoglutarate aminotransferase	2.6.1.5	(sll0402 or sll0480 or slr0036 or sll1713 or sll1958)	(1) 2-Oxoglutarate[c] + (1) L-Tyrosine[c] <=> (1) L-Glutamate[c] + (1) p-hydroxyphenylpyruvate[c]	Alkaloid biosynthesis I, Novobiocin biosynthesis, Tyrosine metabolism, Phenylalanine,tyrosine and tryptophan biosynthesis
rxn00527_tpm1	L-Tyrosine:2-oxoglutarate aminotransferase	2.6.1.5	(sll0402 or sll0480 or slr0036 or sll1713 or sll1958)	(1) 2-Oxoglutarate[c] + (1) L-Tyrosine[c] <=> (1) L-Glutamate[c] + (1) p-hydroxyphenylpyruvate[c]	Alkaloid biosynthesis I, Novobiocin biosynthesis, Tyrosine metabolism, Phenylalanine,tyrosine and tryptophan biosynthesis
rxn02284_tpm3	UDP-N-acetylmuramate:NADP+ oxidoreductase	1.1.1.158	slr1424	(1) NAD[c] + (1) UDP-N-acetylmuramate[c] <=> (1) NADH[c] + (1) H+[c] + (1) UDP-N-acetylglucosamine enolpyruvate[c]	Aminosugars metabolism
rxn02284_tpm2	UDP-N-acetylmuramate:NADP+ oxidoreductase	1.1.1.158	slr1424	(1) NAD[c] + (1) UDP-N-acetylmuramate[c] <=> (1) NADH[c] + (1) H+[c] + (1) UDP-N-acetylglucosamine enolpyruvate[c]	Aminosugars metabolism
rxn01485_tpm4	D-Glucosamine 1-phosphate 1,6-phosphomutase	5.4.2.10	(sll0726 or sll1758)	(1) D-Glucosamine1-phosphate[c] <=> (1) D-Glucosamine phosphate[c]	Aminosugars metabolism
rxn01485_tpm3	D-Glucosamine 1-phosphate 1,6-phosphomutase	5.4.2.10	(sll0726 or sll1758)	(1) D-Glucosamine1-phosphate[c] <=> (1) D-Glucosamine phosphate[c]	Aminosugars metabolism
rxn01485_tpm1	D-Glucosamine 1-phosphate 1,6-phosphomutase	5.4.2.10	(sll0726 or sll1758)	(1) D-Glucosamine1-phosphate[c] <=> (1) D-Glucosamine phosphate[c]	Aminosugars metabolism
rxn01485_tpm2	D-Glucosamine 1-phosphate 1,6-phosphomutase	5.4.2.10	(sll0726 or sll1758)	(1) D-Glucosamine1-phosphate[c] <=> (1) D-Glucosamine phosphate[c]	Aminosugars metabolism
rxn01100_tpm3	ATP:3-phospho-D-glycerate 1-phosphotransferase	2.7.2.3	slr0394	(1) ATP[c] + (1) H+[c] + (1) 3-Phosphoglycerate[c] <=> (1) ADP[c] + (1) 1,3-Bisphospho-D-glycerate[c]	Carbon fixation in photosynthetic organisms, Glycolysis / Gluconeogenesis
rxn01100_tpm4	ATP:3-phospho-D-glycerate 1-phosphotransferase	2.7.2.3	slr0394	(1) ATP[c] + (1) H+[c] + (1) 3-Phosphoglycerate[c] <=> (1) ADP[c] + (1) 1,3-Bisphospho-D-glycerate[c]	Carbon fixation in photosynthetic organisms, Glycolysis / Gluconeogenesis
rxn01100_tpm5	ATP:3-phospho-D-glycerate 1-phosphotransferase	2.7.2.3	slr0394	(1) ATP[c] + (1) H+[c] + (1) 3-Phosphoglycerate[c] <=> (1) ADP[c] + (1) 1,3-Bisphospho-D-glycerate[c]	Carbon fixation in photosynthetic organisms, Glycolysis / Gluconeogenesis
rxn00747_tpm5	D-Glyceraldehyde-3-phosphate ketol-isomerase	5.3.1.1	slr0783	(1) Glyceraldehyde3-phosphate[c] <=> (1) Glycerone-phosphate[c]	Carbon fixation in photosynthetic organisms, Inositol metabolism, Fructose and mannose metabolism, Glycolysis / Gluconeogenesis
rxn00747_tpm6	D-Glyceraldehyde-3-phosphate ketol-isomerase	5.3.1.1	slr0783	(1) Glyceraldehyde3-phosphate[c] <=> (1) Glycerone-phosphate[c]	Carbon fixation in photosynthetic organisms, Inositol metabolism, Fructose and mannose metabolism, Glycolysis / Gluconeogenesis
rxn00785_tpm4	D-Fructose 6-phosphate:D-glyceraldehyde-3-phosphate glycolaldehyde	2.2.1.1	sll1070	(1) D-fructose-6-phosphate[c] + (1) Glyceraldehyde3-phosphate[c] <=> (1) D-Xylulose5-phosphate[c] + (1) D-Erythrose4-phosphate[c]	Carbon fixation in photosynthetic organisms, Pentose phosphate pathway
rxn01200_tpm4	Sedoheptulose-7-phosphate:D-glyceraldehyde-3-phosphate	2.2.1.1	sll1070	(1) Glyceraldehyde3-phosphate[c] + (1) Sedoheptulose7-phosphate[c] <=> (1) ribose-5-phosphate[c] + (1) D-Xylulose5-phosphate[c]	Carbon fixation in photosynthetic organisms, Pentose phosphate pathway
rxn00785_tpm5	D-Fructose 6-phosphate:D-glyceraldehyde-3-phosphate glycolaldehyde	2.2.1.1	sll1070	(1) D-fructose-6-phosphate[c] + (1) Glyceraldehyde3-phosphate[c] <=> (1) D-Xylulose5-phosphate[c] + (1) D-Erythrose4-phosphate[c]	Carbon fixation in photosynthetic organisms, Pentose phosphate pathway
rxn01200_tpm5	Sedoheptulose-7-phosphate:D-glyceraldehyde-3-phosphate	2.2.1.1	sll1070	(1) Glyceraldehyde3-phosphate[c] + (1) Sedoheptulose7-phosphate[c] <=> (1) ribose-5-phosphate[c] + (1) D-Xylulose5-phosphate[c]	Carbon fixation in photosynthetic organisms, Pentose phosphate pathway
rxn00785_tpm6	D-Fructose 6-phosphate:D-glyceraldehyde-3-phosphate glycolaldehyde	2.2.1.1	sll1070	(1) D-fructose-6-phosphate[c] + (1) Glyceraldehyde3-phosphate[c] <=> (1) D-Xylulose5-phosphate[c] + (1) D-Erythrose4-phosphate[c]	Carbon fixation in photosynthetic organisms, Pentose phosphate pathway
rxn01200_tpm6	Sedoheptulose-7-phosphate:D-glyceraldehyde-3-phosphate	2.2.1.1	sll1070	(1) Glyceraldehyde3-phosphate[c] + (1) Sedoheptulose7-phosphate[c] <=> (1) ribose-5-phosphate[c] + (1) D-Xylulose5-phosphate[c]	Carbon fixation in photosynthetic organisms, Pentose phosphate pathway
rxn01200_tpm8	Sedoheptulose-7-phosphate:D-glyceraldehyde-3-phosphate	2.2.1.1	sll1070	(1) Glyceraldehyde3-phosphate[c] + (1) Sedoheptulose7-phosphate[c] <=> (1) ribose-5-phosphate[c] + (1) D-Xylulose5-phosphate[c]	Carbon fixation in photosynthetic organisms, Pentose phosphate pathway
rxn01387_tpm2	Isocitrate:NADP+ oxidoreductase (decarboxylating)	1.1.1.42	slr1289	(1) NADP[c] + (1) Isocitrate[c] <=> (1) NADPH[c] + (1) H+[c] + (1) Oxalosuccinate[c]	Citrate cycle (TCA cycle)
rxn01387_tpm6	Isocitrate:NADP+ oxidoreductase (decarboxylating)	1.1.1.42	slr1289	(1) NADP[c] + (1) Isocitrate[c] <=> (1) NADPH[c] + (1) H+[c] + (1) Oxalosuccinate[c]	Citrate cycle (TCA cycle)
rxn01387_tpm5	Isocitrate:NADP+ oxidoreductase (decarboxylating)	1.1.1.42	slr1289	(1) NADP[c] + (1) Isocitrate[c] <=> (1) NADPH[c] + (1) H+[c] + (1) Oxalosuccinate[c]	Citrate cycle (TCA cycle)
rxn00260_tpm7	L-Aspartate:2-oxoglutarate aminotrransferase	2.6.1.1	(sll0402 or slr0036)	(1) 2-Oxoglutarate[c] + (1) L-Aspartate[c] <=> (1) L-Glutamate[c] + (1) Oxaloacetate[c]	Glutamate metabolism, Carbon fixation in photosynthetic organisms, Alanine and aspartate metabolism
rxn00260_tpm8	L-Aspartate:2-oxoglutarate aminotrransferase	2.6.1.1	(sll0402 or slr0036)	(1) 2-Oxoglutarate[c] + (1) L-Aspartate[c] <=> (1) L-Glutamate[c] + (1) Oxaloacetate[c]	Glutamate metabolism, Carbon fixation in photosynthetic organisms, Alanine and aspartate metabolism
rxn00260_tpm11	L-Aspartate:2-oxoglutarate aminotrransferase	2.6.1.1	(sll0402 or slr0036)	(1) 2-Oxoglutarate[c] + (1) L-Aspartate[c] <=> (1) L-Glutamate[c] + (1) Oxaloacetate[c]	Glutamate metabolism, Carbon fixation in photosynthetic organisms, Alanine and aspartate metabolism
rxn00260_tpm10	L-Aspartate:2-oxoglutarate aminotrransferase	2.6.1.1	(sll0402 or slr0036)	(1) 2-Oxoglutarate[c] + (1) L-Aspartate[c] <=> (1) L-Glutamate[c] + (1) Oxaloacetate[c]	Glutamate metabolism, Carbon fixation in photosynthetic organisms, Alanine and aspartate metabolism
rxn00260_tpm9	L-Aspartate:2-oxoglutarate aminotrransferase	2.6.1.1	(sll0402 or slr0036)	(1) 2-Oxoglutarate[c] + (1) L-Aspartate[c] <=> (1) L-Glutamate[c] + (1) Oxaloacetate[c]	Glutamate metabolism, Carbon fixation in photosynthetic organisms, Alanine and aspartate metabolism
rxn01106_tpm4	2-Phospho-D-glycerate 2,3-phosphomutase	5.4.2.1	(slr1124) or (slr1945) or (slr0395)	(1) 2-Phospho-D-glycerate[c] <=> (1) 3-Phosphoglycerate[c]	Glycolysis / Gluconeogenesis
rxn00459_tpm2	2-Phospho-D-glycerate hydro-lyase	4.2.1.11	slr0752	(1) 2-Phospho-D-glycerate[c] <=> (1) H2O[c] + (1) Phosphoenolpyruvate[c]	Glycolysis / Gluconeogenesis
rxn00459_tpm3	2-Phospho-D-glycerate hydro-lyase	4.2.1.11	slr0752	(1) 2-Phospho-D-glycerate[c] <=> (1) H2O[c] + (1) Phosphoenolpyruvate[c]	Glycolysis / Gluconeogenesis
rxn08299_tpm2	diacylglycerol kinase (n-C18:0)	2.7.1.107	slr0054	(1) ATP[c] + (1) 1,2-Diacyl-sn-glycerol dioctadecanoyl[c] <=> (1) ADP[c] + (1) 1,2-dioctadecanoyl-sn-glycerol 3-phosphate[c]	Lipid Metabolism
rxn08299_tpm3	diacylglycerol kinase (n-C18:0)	2.7.1.107	slr0054	(1) ATP[c] + (1) 1,2-Diacyl-sn-glycerol dioctadecanoyl[c] <=> (1) ADP[c] + (1) 1,2-dioctadecanoyl-sn-glycerol 3-phosphate[c]	Lipid Metabolism
rxn08299_tpm4	diacylglycerol kinase (n-C18:0)	2.7.1.107	slr0054	(1) ATP[c] + (1) 1,2-Diacyl-sn-glycerol dioctadecanoyl[c] <=> (1) ADP[c] + (1) 1,2-dioctadecanoyl-sn-glycerol 3-phosphate[c]	Lipid Metabolism
rxn08299_tpm5	diacylglycerol kinase (n-C18:0)	2.7.1.107	slr0054	(1) ATP[c] + (1) 1,2-Diacyl-sn-glycerol dioctadecanoyl[c] <=> (1) ADP[c] + (1) 1,2-dioctadecanoyl-sn-glycerol 3-phosphate[c]	Lipid Metabolism
rxn08299_tpm6	diacylglycerol kinase (n-C18:0)	2.7.1.107	slr0054	(1) ATP[c] + (1) 1,2-Diacyl-sn-glycerol dioctadecanoyl[c] <=> (1) ADP[c] + (1) 1,2-dioctadecanoyl-sn-glycerol 3-phosphate[c]	Lipid Metabolism
rxn08300_tpm1	diacylglycerol kinase (n-C18:1)	2.7.1.107	slr0054	(1) ATP[c] + (1) 1,2-Diacyl-sn-glycerol dioctadec-11-enoyl[c] <=> (1) ADP[c] + (1) 1,2-dioctadec-11-enoyl-sn-glycerol 3-phosphate[c]	Lipid Metabolism
rxn08300_tpm2	diacylglycerol kinase (n-C18:1)	2.7.1.107	slr0054	(1) ATP[c] + (1) 1,2-Diacyl-sn-glycerol dioctadec-11-enoyl[c] <=> (1) ADP[c] + (1) 1,2-dioctadec-11-enoyl-sn-glycerol 3-phosphate[c]	Lipid Metabolism
rxn08300_tpm3	diacylglycerol kinase (n-C18:1)	2.7.1.107	slr0054	(1) ATP[c] + (1) 1,2-Diacyl-sn-glycerol dioctadec-11-enoyl[c] <=> (1) ADP[c] + (1) 1,2-dioctadec-11-enoyl-sn-glycerol 3-phosphate[c]	Lipid Metabolism
rxn08300_tpm4	diacylglycerol kinase (n-C18:1)	2.7.1.107	slr0054	(1) ATP[c] + (1) 1,2-Diacyl-sn-glycerol dioctadec-11-enoyl[c] <=> (1) ADP[c] + (1) 1,2-dioctadec-11-enoyl-sn-glycerol 3-phosphate[c]	Lipid Metabolism
rxn08300_tpm5	diacylglycerol kinase (n-C18:1)	2.7.1.107	slr0054	(1) ATP[c] + (1) 1,2-Diacyl-sn-glycerol dioctadec-11-enoyl[c] <=> (1) ADP[c] + (1) 1,2-dioctadec-11-enoyl-sn-glycerol 3-phosphate[c]	Lipid Metabolism
rxn08300_tpm6	diacylglycerol kinase (n-C18:1)	2.7.1.107	slr0054	(1) ATP[c] + (1) 1,2-Diacyl-sn-glycerol dioctadec-11-enoyl[c] <=> (1) ADP[c] + (1) 1,2-dioctadec-11-enoyl-sn-glycerol 3-phosphate[c]	Lipid Metabolism
rxn08298_tpm1	diacylglycerol kinase (n-C16:1)	2.7.1.107	slr0054	(1) ATP[c] + (1) 1,2-Diacyl-sn-glycerol dihexadec-9-enoyl[c] <=> (1) ADP[c] + (1) 1,2-dihexadec-9-enoyl-sn-glycerol 3-phosphate[c]	Lipid Metabolism
rxn08298_tpm2	diacylglycerol kinase (n-C16:1)	2.7.1.107	slr0054	(1) ATP[c] + (1) 1,2-Diacyl-sn-glycerol dihexadec-9-enoyl[c] <=> (1) ADP[c] + (1) 1,2-dihexadec-9-enoyl-sn-glycerol 3-phosphate[c]	Lipid Metabolism
rxn08298_tpm3	diacylglycerol kinase (n-C16:1)	2.7.1.107	slr0054	(1) ATP[c] + (1) 1,2-Diacyl-sn-glycerol dihexadec-9-enoyl[c] <=> (1) ADP[c] + (1) 1,2-dihexadec-9-enoyl-sn-glycerol 3-phosphate[c]	Lipid Metabolism
rxn08298_tpm4	diacylglycerol kinase (n-C16:1)	2.7.1.107	slr0054	(1) ATP[c] + (1) 1,2-Diacyl-sn-glycerol dihexadec-9-enoyl[c] <=> (1) ADP[c] + (1) 1,2-dihexadec-9-enoyl-sn-glycerol 3-phosphate[c]	Lipid Metabolism
rxn08298_tpm5	diacylglycerol kinase (n-C16:1)	2.7.1.107	slr0054	(1) ATP[c] + (1) 1,2-Diacyl-sn-glycerol dihexadec-9-enoyl[c] <=> (1) ADP[c] + (1) 1,2-dihexadec-9-enoyl-sn-glycerol 3-phosphate[c]	Lipid Metabolism
rxn08298_tpm6	diacylglycerol kinase (n-C16:1)	2.7.1.107	slr0054	(1) ATP[c] + (1) 1,2-Diacyl-sn-glycerol dihexadec-9-enoyl[c] <=> (1) ADP[c] + (1) 1,2-dihexadec-9-enoyl-sn-glycerol 3-phosphate[c]	Lipid Metabolism
rxn08297_tpm1	diacylglycerol kinase (n-C16:0)	2.7.1.107	slr0054	(1) ATP[c] + (1) 1,2-Diacyl-sn-glycerol dihexadecanoyl[c] <=> (1) ADP[c] + (1) 1,2-dihexadecanoyl-sn-glycerol 3-phosphate[c]	Lipid Metabolism
rxn08297_tpm2	diacylglycerol kinase (n-C16:0)	2.7.1.107	slr0054	(1) ATP[c] + (1) 1,2-Diacyl-sn-glycerol dihexadecanoyl[c] <=> (1) ADP[c] + (1) 1,2-dihexadecanoyl-sn-glycerol 3-phosphate[c]	Lipid Metabolism
rxn08297_tpm3	diacylglycerol kinase (n-C16:0)	2.7.1.107	slr0054	(1) ATP[c] + (1) 1,2-Diacyl-sn-glycerol dihexadecanoyl[c] <=> (1) ADP[c] + (1) 1,2-dihexadecanoyl-sn-glycerol 3-phosphate[c]	Lipid Metabolism
rxn02928_tpm1	2,3,4,5-Tetrahydrodipicolinate:NAD+ oxidoreductase	1.3.1.26	sll1058	(1) NAD[c] + (1) tetrahydrodipicolinate[c] <=> (1) NADH[c] + (1) H+[c] + (1) Dihydrodipicolinate[c]	Lysine biosynthesis
rxn01301_tpm6	L-Homoserine:NAD+ oxidoreductase	1.1.1.3	sll0455	(1) NAD[c] + (1) L-Homoserine[c] <=> (1) NADH[c] + (1) H+[c] + (1) L-Aspartate4-semialdehyde[c]	Lysine biosynthesis, Glycine,serine and threonine metabolism
rxn02186_tpm7	2,3-Dihydroxy-3-methylbutanoate:NADP+ oxidoreductase (isomerizing)	1.1.1.86	sll1363	(1) NADPH[c] + (1) H+[c] + (1) 2-Acetolactate[c] --> (1) NADP[c] + (1) 2,3-Dihydroxy-isovalerate[c]	Pantothenate and CoA biosynthesis
rxn00903_tpm1	L-Valine:2-oxoglutarate aminotransferase	2.6.1.42	slr0032	(1) 2-Oxoglutarate[c] + (1) L-Valine[c] <=> (1) L-Glutamate[c] + (1) 3-Methyl-2-oxobutanoate[c]	Pantothenate and CoA biosynthesis, Valine,leucine and isoleucine degradation, Valine,leucine and isoleucine biosynthesis
rxn00903_tpm2	L-Valine:2-oxoglutarate aminotransferase	2.6.1.42	slr0032	(1) 2-Oxoglutarate[c] + (1) L-Valine[c] <=> (1) L-Glutamate[c] + (1) 3-Methyl-2-oxobutanoate[c]	Pantothenate and CoA biosynthesis, Valine,leucine and isoleucine degradation, Valine,leucine and isoleucine biosynthesis
rxn00903_tpm5	L-Valine:2-oxoglutarate aminotransferase	2.6.1.42	slr0032	(1) 2-Oxoglutarate[c] + (1) L-Valine[c] <=> (1) L-Glutamate[c] + (1) 3-Methyl-2-oxobutanoate[c]	Pantothenate and CoA biosynthesis, Valine,leucine and isoleucine degradation, Valine,leucine and isoleucine biosynthesis
rxn00903_tpm6	L-Valine:2-oxoglutarate aminotransferase	2.6.1.42	slr0032	(1) 2-Oxoglutarate[c] + (1) L-Valine[c] <=> (1) L-Glutamate[c] + (1) 3-Methyl-2-oxobutanoate[c]	Pantothenate and CoA biosynthesis, Valine,leucine and isoleucine degradation, Valine,leucine and isoleucine biosynthesis
rxn00493_tpm3	L-Phenylalanine:2-oxoglutarate aminotransferase	2.6.1.58	(sll0402 or sll0480 or slr0036 or sll1713 or sll1958)	(1) 2-Oxoglutarate[c] + (1) L-Phenylalanine[c] <=> (1) L-Glutamate[c] + (1) Phenylpyruvate[c]	Phenylalanine,tyrosine and tryptophan biosynthesis, Phenylalanine metabolism
rxn00493_tpm2	L-Phenylalanine:2-oxoglutarate aminotransferase	2.6.1.58	(sll0402 or sll0480 or slr0036 or sll1713 or sll1958)	(1) 2-Oxoglutarate[c] + (1) L-Phenylalanine[c] <=> (1) L-Glutamate[c] + (1) Phenylpyruvate[c]	Phenylalanine,tyrosine and tryptophan biosynthesis, Phenylalanine metabolism
rxn00493_tpm6	L-Phenylalanine:2-oxoglutarate aminotransferase	2.6.1.58	(sll0402 or sll0480 or slr0036 or sll1713 or sll1958)	(1) 2-Oxoglutarate[c] + (1) L-Phenylalanine[c] <=> (1) L-Glutamate[c] + (1) Phenylpyruvate[c]	Phenylalanine,tyrosine and tryptophan biosynthesis, Phenylalanine metabolism
rxn00493_tpm5	L-Phenylalanine:2-oxoglutarate aminotransferase	2.6.1.58	(sll0402 or sll0480 or slr0036 or sll1713 or sll1958)	(1) 2-Oxoglutarate[c] + (1) L-Phenylalanine[c] <=> (1) L-Glutamate[c] + (1) Phenylpyruvate[c]	Phenylalanine,tyrosine and tryptophan biosynthesis, Phenylalanine metabolism
rxn00493_tpm4	L-Phenylalanine:2-oxoglutarate aminotransferase	2.6.1.58	(sll0402 or sll0480 or slr0036 or sll1713 or sll1958)	(1) 2-Oxoglutarate[c] + (1) L-Phenylalanine[c] <=> (1) L-Glutamate[c] + (1) Phenylpyruvate[c]	Phenylalanine,tyrosine and tryptophan biosynthesis, Phenylalanine metabolism
rxn00493_tpm1	L-Phenylalanine:2-oxoglutarate aminotransferase	2.6.1.58	(sll0402 or sll0480 or slr0036 or sll1713 or sll1958)	(1) 2-Oxoglutarate[c] + (1) L-Phenylalanine[c] <=> (1) L-Glutamate[c] + (1) Phenylpyruvate[c]	Phenylalanine,tyrosine and tryptophan biosynthesis, Phenylalanine metabolism
rxn00501_tpm2	3-Oxopropanoate:NAD+ oxidoreductase (decarboxylating)	1.2.1.18 and 1.2.1.27	slr0091	(1) NAD[c] + (1) CoA[c] + (1) 3-Oxopropanoate[c] <=> (1) NADH[c] + (1) CO2[c] + (1) Acetyl-CoA[c]	Propanoate metabolism
rxn00501_tpm1	3-Oxopropanoate:NAD+ oxidoreductase (decarboxylating)	1.2.1.18 and 1.2.1.27	slr0091	(1) NAD[c] + (1) CoA[c] + (1) 3-Oxopropanoate[c] <=> (1) NADH[c] + (1) CO2[c] + (1) Acetyl-CoA[c]	Propanoate metabolism
rxn00501_tpm3	3-Oxopropanoate:NAD+ oxidoreductase (decarboxylating)	1.2.1.18 and 1.2.1.27	slr0091	(1) NAD[c] + (1) CoA[c] + (1) 3-Oxopropanoate[c] <=> (1) NADH[c] + (1) CO2[c] + (1) Acetyl-CoA[c]	Propanoate metabolism
rxn00104_tpm1	ATP:polyphosphate phosphotransferase	2.7.4.1	sll0290	(1) ATP[c] + (1) PPi[c] <=> (1) ADP[c] + (1) H+[c] + (1) Triphosphate[c]	Purine metabolism
rxn00104_tpm2	ATP:polyphosphate phosphotransferase	2.7.4.1	sll0290	(1) ATP[c] + (1) PPi[c] <=> (1) ADP[c] + (1) H+[c] + (1) Triphosphate[c]	Purine metabolism
rxn00104_tpm3	ATP:polyphosphate phosphotransferase	2.7.4.1	sll0290	(1) ATP[c] + (1) PPi[c] <=> (1) ADP[c] + (1) H+[c] + (1) Triphosphate[c]	Purine metabolism
rxn00104_tpm4	ATP:polyphosphate phosphotransferase	2.7.4.1	sll0290	(1) ATP[c] + (1) PPi[c] <=> (1) ADP[c] + (1) H+[c] + (1) Triphosphate[c]	Purine metabolism
rxn00104_tpm5	ATP:polyphosphate phosphotransferase	2.7.4.1	sll0290	(1) ATP[c] + (1) PPi[c] <=> (1) ADP[c] + (1) H+[c] + (1) Triphosphate[c]	Purine metabolism
rxn00104_tpm6	ATP:polyphosphate phosphotransferase	2.7.4.1	sll0290	(1) ATP[c] + (1) PPi[c] <=> (1) ADP[c] + (1) H+[c] + (1) Triphosphate[c]	Purine metabolism
rxn02938_tpm4	1-(5-Phospho-D-ribosyl)-5-amino-4-imidazolecarboxylate carboxy-lyase	4.1.1.21	(sll0901 and sll0578)	(1) H+[c] + (1) 5'-Phosphoribosyl-4-carboxy-5-aminoimidazole[c] <=> (1) CO2[c] + (1) Aminoimidazole ribotide[c]	Purine metabolism
rxn00832_tpm1	IMP 1,2-hydrolase (decyclizing)	3.5.4.10	slr0597	(1) H2O[c] + (1) IMP[c] <=> (1) FAICAR[c]	Purine metabolism
rxn01517_tpm2	ATP:dTMP phosphotransferase	0	slr0379	(1) ATP[c] + (1) dUMP[c] <=> (1) ADP[c] + (1) dUDP[c]	Pyrimidine metabolism
rxn01517_tpm1	ATP:dTMP phosphotransferase	0	slr0379	(1) ATP[c] + (1) dUMP[c] <=> (1) ADP[c] + (1) dUDP[c]	Pyrimidine metabolism
rxn01517_tpm4	ATP:dTMP phosphotransferase	0	slr0379	(1) ATP[c] + (1) dUMP[c] <=> (1) ADP[c] + (1) dUDP[c]	Pyrimidine metabolism
rxn01517_tpm3	ATP:dTMP phosphotransferase	0	slr0379	(1) ATP[c] + (1) dUMP[c] <=> (1) ADP[c] + (1) dUDP[c]	Pyrimidine metabolism
rxn01678_tpm4	ATP:nucleoside-diphosphate phosphatransferase	2.7.4.6	sll1852	(1) ATP[c] + (1) dUDP[c] <=> (1) ADP[c] + (1) dUTP[c]	Pyrimidine metabolism
rxn01465_tpm1	(S)-Dihydroorotate amidohydrolase	3.5.2.3	(sll1018) or (slr0406)	(1) H2O[c] + (1) S-Dihydroorotate[c] <=> (1) H+[c] + (1) N-Carbamoyl-L-aspartate[c]	Pyrimidine metabolism
rxn01362_tpm2	Orotidine-5'-phosphate:pyrophosphate phosphoribosyltransferase	2.4.2.10	slr0185	(1) PPi[c] + (1) Orotidylic acid[c] <=> (1) PRPP[c] + (1) Orotate[c]	Pyrimidine metabolism
rxn01465_tpm2	(S)-Dihydroorotate amidohydrolase	3.5.2.3	(sll1018) or (slr0406)	(1) H2O[c] + (1) S-Dihydroorotate[c] <=> (1) H+[c] + (1) N-Carbamoyl-L-aspartate[c]	Pyrimidine metabolism
rxn01362_tpm3	Orotidine-5'-phosphate:pyrophosphate phosphoribosyltransferase	2.4.2.10	slr0185	(1) PPi[c] + (1) Orotidylic acid[c] <=> (1) PRPP[c] + (1) Orotate[c]	Pyrimidine metabolism
rxn01465_tpm3	(S)-Dihydroorotate amidohydrolase	3.5.2.3	(sll1018) or (slr0406)	(1) H2O[c] + (1) S-Dihydroorotate[c] <=> (1) H+[c] + (1) N-Carbamoyl-L-aspartate[c]	Pyrimidine metabolism
rxn01362_tpm4	Orotidine-5'-phosphate:pyrophosphate phosphoribosyltransferase	2.4.2.10	slr0185	(1) PPi[c] + (1) Orotidylic acid[c] <=> (1) PRPP[c] + (1) Orotate[c]	Pyrimidine metabolism
rxn02342_tpm6	2-(alpha-Hydroxyethyl)thiamine diphosphate:lipoamide	1.2.4.1	sll1721 and slr1934	(1) Lipoamide[c] + (1) 2-Hydroxyethyl-ThPP[c] <=> (1) TPP[c] + (1) S-Acetyldihydrolipoamide[c]	Pyruvate Metabolism
rxn02342_tpm4	2-(alpha-Hydroxyethyl)thiamine diphosphate:lipoamide	1.2.4.1	sll1721 and slr1934	(1) Lipoamide[c] + (1) 2-Hydroxyethyl-ThPP[c] <=> (1) TPP[c] + (1) S-Acetyldihydrolipoamide[c]	Pyruvate Metabolism
rxn02342_tpm5	2-(alpha-Hydroxyethyl)thiamine diphosphate:lipoamide	1.2.4.1	sll1721 and slr1934	(1) Lipoamide[c] + (1) 2-Hydroxyethyl-ThPP[c] <=> (1) TPP[c] + (1) S-Acetyldihydrolipoamide[c]	Pyruvate Metabolism
rxn02342_tpm3	2-(alpha-Hydroxyethyl)thiamine diphosphate:lipoamide	1.2.4.1	sll1721 and slr1934	(1) Lipoamide[c] + (1) 2-Hydroxyethyl-ThPP[c] <=> (1) TPP[c] + (1) S-Acetyldihydrolipoamide[c]	Pyruvate Metabolism
rxn02342_tpm2	2-(alpha-Hydroxyethyl)thiamine diphosphate:lipoamide	1.2.4.1	sll1721 and slr1934	(1) Lipoamide[c] + (1) 2-Hydroxyethyl-ThPP[c] <=> (1) TPP[c] + (1) S-Acetyldihydrolipoamide[c]	Pyruvate Metabolism
rxn02342_tpm1	2-(alpha-Hydroxyethyl)thiamine diphosphate:lipoamide	1.2.4.1	sll1721 and slr1934	(1) Lipoamide[c] + (1) 2-Hydroxyethyl-ThPP[c] <=> (1) TPP[c] + (1) S-Acetyldihydrolipoamide[c]	Pyruvate Metabolism
rxn00830_tpm6	rxn00830	0	0	(1) Isopentenyldiphosphate[c] <=> (1) DMAPP[c]	Terpenoid biosynthesis, Biosynthesis of steroids
rxn02811_tpm1	3-Isopropylmalate hydro-lyase	4.2.1.33	sll1470 and sll1444	(1) 3-Isopropylmalate[c] <=> (1) H2O[c] + (1) 2-Isopropylmaleate[c]	Valine,leucine and isoleucine biosynthesis
rxn02811_tpm2	3-Isopropylmalate hydro-lyase	4.2.1.33	sll1470 and sll1444	(1) 3-Isopropylmalate[c] <=> (1) H2O[c] + (1) 2-Isopropylmaleate[c]	Valine,leucine and isoleucine biosynthesis
rxn02811_tpm3	3-Isopropylmalate hydro-lyase	4.2.1.33	sll1470 and sll1444	(1) 3-Isopropylmalate[c] <=> (1) H2O[c] + (1) 2-Isopropylmaleate[c]	Valine,leucine and isoleucine biosynthesis
rxn01575_tpm5	L-Isoleucine:2-oxoglutarate aminotransferase	2.6.1.42	slr0032	(1) 2-Oxoglutarate[c] + (1) L-Isoleucine[c] <=> (1) L-Glutamate[c] + (1) 2-keto-3-methyl-valerate[c]	Valine,leucine and isoleucine degradation, Valine,leucine and isoleucine biosynthesis
rxn01575_tpm6	L-Isoleucine:2-oxoglutarate aminotransferase	2.6.1.42	slr0032	(1) 2-Oxoglutarate[c] + (1) L-Isoleucine[c] <=> (1) L-Glutamate[c] + (1) 2-keto-3-methyl-valerate[c]	Valine,leucine and isoleucine degradation, Valine,leucine and isoleucine biosynthesis
rxn00806_tpm4	L-Leucine:2-oxoglutarate aminotransferase	2.6.1.6	slr0032	(1) 2-Oxoglutarate[c] + (1) L-Leucine[c] <=> (1) L-Glutamate[c] + (1) 4MOP[c]	Valine,leucine and isoleucine degradation, Valine,leucine and isoleucine biosynthesis
rxn00806_tpm5	L-Leucine:2-oxoglutarate aminotransferase	2.6.1.6	slr0032	(1) 2-Oxoglutarate[c] + (1) L-Leucine[c] <=> (1) L-Glutamate[c] + (1) 4MOP[c]	Valine,leucine and isoleucine degradation, Valine,leucine and isoleucine biosynthesis
rxn00806_tpm6	L-Leucine:2-oxoglutarate aminotransferase	2.6.1.6	slr0032	(1) 2-Oxoglutarate[c] + (1) L-Leucine[c] <=> (1) L-Glutamate[c] + (1) 4MOP[c]	Valine,leucine and isoleucine degradation, Valine,leucine and isoleucine biosynthesis
