# Supplementary material for: A diurnal flux balance model of Synechocystis sp. PCC 6803 metabolism
Source: PLoS Comput Biol. 2019 Jan 24;15(1):e1006692. doi: 10.1371/journal.pcbi.1006692 (PMC6364703; doi:10.1371/journal.pcbi.1006692)
Supplement: S5 Table — (XLSX) [file pcbi.1006692.s005.xlsx]

## Sheet: BaseModel_REACTIONS
Reaction ID	Reaction Name	EC number	GPR	Reaction Description	Reaction	Reaction Bounds	Pathway	Reference
rxn00208	Pyridoxamine-5'-phosphate:oxygen oxidoreductase (deaminating)	1.4.3.5	sll1440	(1) H2O[c] + (1) O2[c] + (1) Pyridoxamine phosphate[c] <=> (1) NH3[c] + (1) Pyridoxal phosphate[c] + (1) H2O2[c]	(1) cpd00001[c] + (1) cpd00007[c] + (1) cpd00493[c] <=> (1) cpd00013[c] + (1) cpd00016[c] + (1) cpd00025[c]	-10000,10000	Vitamin B6 metabolism
rxn00209	Pyridoxine 5-phosphate:oxygen oxidoreductase (deaminating)	1.4.3.5	sll1440	(1) O2[c] + (1) Pyridoxine phosphate[c] <=> (1) Pyridoxal phosphate[c] + (1) H2O2[c]	(1) cpd00007[c] + (1) cpd00478[c] <=> (1) cpd00016[c] + (1) cpd00025[c]	-10000,10000	Vitamin B6 metabolism																			Amino Acid
rxn09071	pyridoxine 5'-phosphate oxidase (anaerboic	Undetermined	sll1440	(1) NAD[c] + (1) Pyridoxine phosphate[c] <=> (1) NADH[c] + (1) Pyridoxal phosphate[c] + (1) H+[c]	(1) cpd00003[c] + (1) cpd00478[c] <=> (1) cpd00004[c] + (1) cpd00016[c] + (1) cpd00067[c]	-10000,10000	Vitamin B6 metabolism
rxn01248	Pyridoxal:NAD+ 4-oxidoreductase	1.5.1.2	slr0661	(1) NAD[c] + (1) Pyridoxal[c] <=> (1) NADH[c] + (1) H+[c] + (1) 4-Pyridoxolactone[c]	(1) cpd00003[c] + (1) cpd00215[c] <=> (1) cpd00004[c] + (1) cpd00067[c] + (1) cpd00715[c]	-10000,10000	Vitamin B6 metabolism
rxn01208	2-Oxo-4-methyl-3-carboxypentanoate decarboxylation	2.2.1.6		(1) H+[c] + (1) 2-isopropyl-3-oxosuccinate[c] --> (1) CO2[c] + (1) 4MOP[c]	(1) cpd00067[c] + (1) cpd02605[c] --> (1) cpd00011[c] + (1) cpd00200[c]	0,10000	Valine,leucine and isoleucine degradation, Valine,leucine and isoleucine biosynthesis
rxn00806	L-Leucine:2-oxoglutarate aminotransferase	2.6.1.6	slr0032	(1) 2-Oxoglutarate[c] + (1) L-Leucine[c] <=> (1) L-Glutamate[c] + (1) 4MOP[c]	(1) cpd00024[c] + (1) cpd00107[c] <=> (1) cpd00023[c] + (1) cpd00200[c]	-10000,10000	Valine,leucine and isoleucine degradation, Valine,leucine and isoleucine biosynthesis
rxn01575	L-Isoleucine:2-oxoglutarate aminotransferase	2.6.1.42	slr0032	(1) 2-Oxoglutarate[c] + (1) L-Isoleucine[c] <=> (1) L-Glutamate[c] + (1) 2-keto-3-methyl-valerate[c]	(1) cpd00024[c] + (1) cpd00322[c] <=> (1) cpd00023[c] + (1) cpd00508[c]	-10000,10000	Valine,leucine and isoleucine degradation, Valine,leucine and isoleucine biosynthesis
rxn01480	3-Hydroxy-2-methylpropanoate:NAD+ oxidoreductase	1.1.1.31	slr0229	(1) NAD[c] + (1) 3-Hydroxyisobutyrate[c] --> (1) NADH[c] + (1) H+[c] + (1) 3-Oxo-2-methylpropanoate[c]	(1) cpd00003[c] + (1) cpd00876[c] --> (1) cpd00004[c] + (1) cpd00067[c] + (1) cpd00287[c]	0,10000	Valine,leucine and isoleucine degradation
rxn00737	L-threonine ammonia-lyase	4.3.1.19	slr2072	(1) L-Threonine[c] --> (1) NH3[c] + (1) 2-Oxobutyrate[c]	(1) cpd00161[c] --> (1) cpd00013[c] + (1) cpd00094[c]	0,10000	Valine,leucine and isoleucine biosynthesis, Glycine,serine and threonine metabolism
rxn03437	(R)-2,3-Dihydroxy-3-methylpentanoate hydro-lyase	4.2.1.9	slr0452	(1) 2,3-Dihydroxy-3-methylvalerate[c] --> (1) H2O[c] + (1) 2-keto-3-methyl-valerate[c]	(1) cpd02535[c] --> (1) cpd00001[c] + (1) cpd00508[c]	0,10000	Valine,leucine and isoleucine biosynthesis
rxn03062	3-Isopropylmalate:NAD+ oxidoreductase	1.1.1.85	slr1517	(1) NAD[c] + (1) 3-Isopropylmalate[c] --> (1) NADH[c] + (1) H+[c] + (1) 2-isopropyl-3-oxosuccinate[c]	(1) cpd00003[c] + (1) cpd02693[c] --> (1) cpd00004[c] + (1) cpd00067[c] + (1) cpd02605[c]	0,10000	Valine,leucine and isoleucine biosynthesis
rxn11245	3-isopropylmalate dehydrogenase	Undetermined	slr1517	(1) NAD[c] + (1) 3-Isopropylmalate[c] --> (1) NADH[c] + (1) CO2[c] + (1) 4MOP[c]	(1) cpd00003[c] + (1) cpd02693[c] --> (1) cpd00004[c] + (1) cpd00011[c] + (1) cpd00200[c]	0,10000	Valine,leucine and isoleucine biosynthesis
rxn03194	(S)-2-Aceto-2-hydroxybutanoate pyruvate-lyase (carboxylating)	2.2.1.6	sll0065	(1) 2-Oxobutyrate[c] + (1) 2-Hydroxyethyl-ThPP[c] <=> (1) TPP[c] + (1) 2-Aceto-2-hydroxybutanoate[c]	(1) cpd00094[c] + (1) cpd03049[c] <=> (1) cpd00056[c] + (1) cpd00498[c]	-10000,10000	Valine,leucine and isoleucine biosynthesis
rxn02187	2-Acetolactate methylmutase	1.1.1.86	sll1363	(1) 2-Acetolactate[c] <=> (1) 2-Oxo-3-hydroxyisovalerate[c]	(1) cpd00668[c] <=> (1) cpd02569[c]	-10000,10000	Valine,leucine and isoleucine biosynthesis
rxn03435	(R)-2,3-Dihydroxy-3-methylpentanoate:NADP+ oxidoreductase	1.1.1.86	sll1363	(1) NADP[c] + (1) 2,3-Dihydroxy-3-methylvalerate[c] <=> (1) NADPH[c] + (1) H+[c] + (1) (R)-3-Hydroxy-3-methyl-2-oxopentanoate[c]	(1) cpd00006[c] + (1) cpd02535[c] <=> (1) cpd00005[c] + (1) cpd00067[c] + (1) cpd10162[c]	-10000,10000	Valine,leucine and isoleucine biosynthesis
rxn02789	2-Isopropylmalate hydro-lyase	4.2.1.33	sll1470 and sll1444	(1) 2-Isopropylmalate[c] <=> (1) H2O[c] + (1) 2-Isopropylmaleate[c]	(1) cpd01646[c] <=> (1) cpd00001[c] + (1) cpd01710[c]	-10000,10000	Valine,leucine and isoleucine biosynthesis
rxn02811	3-Isopropylmalate hydro-lyase	4.2.1.33	sll1470 and sll1444	(1) 3-Isopropylmalate[c] <=> (1) H2O[c] + (1) 2-Isopropylmaleate[c]	(1) cpd02693[c] <=> (1) cpd00001[c] + (1) cpd01710[c]	-10000,10000	Valine,leucine and isoleucine biosynthesis
rxn00101	Urea amidohydrolase	3.5.1.5	(slr1256 and sll0420 and sll1750 and sll1639 and slr1219 and slr1899 and sll0643)	(1) H2O[c] + (2) H+[c] + (1) Urea[c] --> (1) CO2[c] + (2) NH3[c]	(1) cpd00001[c] + (2) cpd00067[c] + (1) cpd00073[c] --> (1) cpd00011[c] + (2) cpd00013[c]	0,10000	Urea cycle and metabolism of amino groups, Purine metabolism
rxn01851	4-aminobutanal:NAD+ 1-oxidoreductase	1.2.1.19	slr0091	(1) H2O[c] + (1) NAD[c] + (1) 4-Aminobutanal[c] --> (1) NADH[c] + (2) H+[c] + (1) GABA[c]	(1) cpd00001[c] + (1) cpd00003[c] + (1) cpd00434[c] --> (1) cpd00004[c] + (2) cpd00067[c] + (1) cpd00281[c]	0,10000	Urea cycle and metabolism of amino groups, beta-Alanine metabolism
rxn01434	L-Citrulline:L-aspartate ligase (AMP-forming)	6.3.4.5	slr0585	(1) ATP[c] + (1) L-Aspartate[c] + (1) Citrulline[c] --> (1) PPi[c] + (1) AMP[c] + (1) L-Argininosuccinate[c]	(1) cpd00002[c] + (1) cpd00041[c] + (1) cpd00274[c] --> (1) cpd00012[c] + (1) cpd00018[c] + (1) cpd02152[c]	0,10000	Urea cycle and metabolism of amino groups, Arginine and proline metabolism, Alanine and aspartate metabolism
rxn00802	N-(L-Argininosuccinate) arginie-lyase	4.3.2.1	slr1133	(1) L-Argininosuccinate[c] <=> (1) L-Arginine[c] + (1) Fumarate[c]	(1) cpd02152[c] <=> (1) cpd00051[c] + (1) cpd00106[c]	-10000,10000	Urea cycle and metabolism of amino groups, Arginine and proline metabolism, Alanine and aspartate metabolism
rxn00394	L-Arginine amidinohydrolase	3.5.3.1	sml0007	(1) H2O[c] + (1) L-Arginine[c] --> (1) Ornithine[c] + (1) Urea[c]	(1) cpd00001[c] + (1) cpd00051[c] --> (1) cpd00064[c] + (1) cpd00073[c]	0,10000	Urea cycle and metabolism of amino groups, Arginine and proline metabolism
rxn01019	Carbamoyl-phosphate:L-ornithine carbamoyltransferase	2.1.3.3	sll0902	(1) Ornithine[c] + (1) Carbamoylphosphate[c] <=> (1) Phosphate[c] + (2) H+[c] + (1) Citrulline[c]	(1) cpd00064[c] + (1) cpd00146[c] <=> (1) cpd00009[c] + (2) cpd00067[c] + (1) cpd00274[c]	-10000,10000	Urea cycle and metabolism of amino groups, Arginine and proline metabolism
rxn00405	L-Arginine carboxy-lyase	4.1.1.19	(slr0662 or slr1312)	(1) L-Arginine[c] + (1) H+[c] --> (1) CO2[c] + (1) Agmatine[c]	(1) cpd00051[c] + (1) cpd00067[c] --> (1) cpd00011[c] + (1) cpd00152[c]	0,10000	Urea cycle and metabolism of amino groups
rxn02373	L-Glutamate-5-semialdehyde:NADP+ 5-oxidoreductase (phosphorylationg)	1.2.1.41	(sll0373) or (sll0461)	(1) NADP[c] + (1) Phosphate[c] + (1) L-Glutamate5-semialdehyde[c] --> (1) NADPH[c] + (1) L-Glutamyl 5-phosphate[c]	(1) cpd00006[c] + (1) cpd00009[c] + (1) cpd00858[c] --> (1) cpd00005[c] + (1) cpd02097[c]	0,10000	Urea cycle and metabolism of amino groups
rxn00858	Agmatine amidinohydrolase	3.5.3.11	(sll1077) or (sll0228)	(1) H2O[c] + (1) Agmatine[c] --> (1) Urea[c] + (1) Putrescine[c]	(1) cpd00001[c] + (1) cpd00152[c] --> (1) cpd00073[c] + (1) cpd00118[c]	0,10000	Urea cycle and metabolism of amino groups
rxn02275	4-Guanidinobutanamide amidohydrolase	3.5.1.4	sll0828	(1) H2O[c] + (1) 4-Guanidinobutanamide[c] --> (1) NH3[c] + (1) 4-Guanidinobutanoate[c]	(1) cpd00001[c] + (1) cpd01973[c] --> (1) cpd00013[c] + (1) cpd00762[c]	0,10000	Urea cycle and metabolism of amino groups
rxn00192	Acetyl-CoA:L-glutamate N-acetyltransferase	2.3.1.35	sll1883	(1) Acetyl-CoA[c] + (1) L-Glutamate[c] --> (1) CoA[c] + (1) H+[c] + (1) N-Acetyl-L-glutamate[c]	(1) cpd00022[c] + (1) cpd00023[c] --> (1) cpd00010[c] + (1) cpd00067[c] + (1) cpd00477[c]	0,10000	Urea cycle and metabolism of amino groups
rxn00855	Acetyl-CoA:alkane-alpha,omega-diamine N-acetyltransferase	2.3.1.57	sll7050	(1) Acetyl-CoA[c] + (1) Putrescine[c] --> (1) CoA[c] + (1) H+[c] + (1) N-Acetylputrescine[c]	(1) cpd00022[c] + (1) cpd00118[c] --> (1) cpd00010[c] + (1) cpd00067[c] + (1) cpd01758[c]	0,10000	Urea cycle and metabolism of amino groups
rxn01459	4-Aminobutyraldehyde:NAD+ oxidoreductase	1.2.1.3	slr0091	(1) H2O[c] + (1) NADP[c] + (1) 4-Aminobutanal[c] --> (1) NADPH[c] + (2) H+[c] + (1) GABA[c]	(1) cpd00001[c] + (1) cpd00006[c] + (1) cpd00434[c] --> (1) cpd00005[c] + (2) cpd00067[c] + (1) cpd00281[c]	0,10000	Urea cycle and metabolism of amino groups
rxn03423	N4-Acetylaminobutanal:NAD+ oxidoreductase	1.2.1.3	slr0091	(1) H2O[c] + (1) NAD[c] + (1) N4-Acetylaminobutanal[c] --> (1) NADH[c] + (2) H+[c] + (1) 4-Acetamidobutanoate[c]	(1) cpd00001[c] + (1) cpd00003[c] + (1) cpd03529[c] --> (1) cpd00004[c] + (2) cpd00067[c] + (1) cpd01889[c]	0,10000	Urea cycle and metabolism of amino groups
rxn01917	ATP:N-acetyl-L-glutamate 5-phosphotransferase	2.7.2.8	slr1898	(1) ATP[c] + (1) H+[c] + (1) N-Acetyl-L-glutamate[c] --> (1) ADP[c] + (1) n-acetylglutamyl-phosphate[c]	(1) cpd00002[c] + (1) cpd00067[c] + (1) cpd00477[c] --> (1) cpd00008[c] + (1) cpd02552[c]	0,10000	Urea cycle and metabolism of amino groups
rxn00179	ATP:L-glutamate 5-phosphotransferase	2.7.2.11	slr2035	(1) ATP[c] + (1) L-Glutamate[c] + (1) H+[c] --> (1) ADP[c] + (1) L-Glutamyl 5-phosphate[c]	(1) cpd00002[c] + (1) cpd00023[c] + (1) cpd00067[c] --> (1) cpd00008[c] + (1) cpd02097[c]	0,10000	Urea cycle and metabolism of amino groups
rxn02465	N-Acetyl-L-glutamate-5-semialdehyde:NADP+ 5-oxidoreductase	1.2.1.38	sll0080	(1) NADP[c] + (1) Phosphate[c] + (1) 2-Acetamido-5-oxopentanoate[c] <=> (1) NADPH[c] + (1) n-acetylglutamyl-phosphate[c]	(1) cpd00006[c] + (1) cpd00009[c] + (1) cpd00918[c] <=> (1) cpd00005[c] + (1) cpd02552[c]	-10000,10000	Urea cycle and metabolism of amino groups
rxn01636	N2-Acetyl-L-ornithine:L-glutamate N-acetyltransferase	2.3.1.35	sll1883	(1) L-Glutamate[c] + (1) N-Acetylornithine[c] <=> (1) Ornithine[c] + (1) N-Acetyl-L-glutamate[c]	(1) cpd00023[c] + (1) cpd00342[c] <=> (1) cpd00064[c] + (1) cpd00477[c]	-10000,10000	Urea cycle and metabolism of amino groups
rxn01637	N2-Acetyl-L-ornithine:2-oxoglutarate aminotransferase	2.6.1.11	slr1022	(1) 2-Oxoglutarate[c] + (1) N-Acetylornithine[c] <=> (1) L-Glutamate[c] + (1) 2-Acetamido-5-oxopentanoate[c]	(1) cpd00024[c] + (1) cpd00342[c] <=> (1) cpd00023[c] + (1) cpd00918[c]	-10000,10000	Urea cycle and metabolism of amino groups
rxn00857	N-Acetylputrescine acetylhydrolase	3.5.1.62		(1) H2O[c] + (1) N-Acetylputrescine[c] <=> (1) Acetate[c] + (1) Putrescine[c]	(1) cpd00001[c] + (1) cpd01758[c] <=> (1) cpd00029[c] + (1) cpd00118[c]	-10000,10000	Urea cycle and metabolism of amino groups
rxn01258	Chorismate hydroxymutase	5.4.99.6	slr0817	(1) Chorismate[c] <=> (1) Isochorismate[c]	(1) cpd00216[c] <=> (1) cpd00658[c]	-10000,10000	Ubiquinone biosynthesis, Biosynthesis of siderophore group nonribosomal peptides
rxn02832	O-succinylbenzoate-CoA synthase	4.2.1.113	sll0409	(1) SHCHC[c] --> (1) H2O[c] + (1) Succinylbenzoate[c]	(1) cpd03451[c] --> (1) cpd00001[c] + (1) cpd01772[c]	0,10000	Ubiquinone biosynthesis
rxn11702	2-succinyl-5-enolpyruvyl-6-hydroxy-3-cyclohexene-1-carboxylate	2.2.1.9	sll0603	(1) 2-Oxoglutarate[c] + (1) H+[c] + (1) Isochorismate[c] --> (1) CO2[c] + (1) 2-Succinyl-5-enolpyruvyl-6-hydroxy-3-cyclohexene-1-carboxylate[c]	(1) cpd00024[c] + (1) cpd00067[c] + (1) cpd00658[c] --> (1) cpd00011[c] + (1) cpd16335[c]	0,10000	Ubiquinone biosynthesis
rxn05024	Naphthoate synthase	4.1.3.36	sll1127	(1) H+[c] + (1) Succinylbenzoyl-CoA[c] --> (1) H2O[c] + (1) 1,4-Dihydroxy-2-naphthoyl-CoA[c]	(1) cpd00067[c] + (1) cpd02021[c] --> (1) cpd00001[c] + (1) cpd11217[c]	0,10000	Ubiquinone biosynthesis
rxn04674	demethylphylloquinone methyltransferase	2.1.1.-	sll1653	(1) S-Adenosyl-L-methionine[c] + (1) Demethylphylloquinone[c] --> (1) S-Adenosyl-homocysteine[c] + (1) H+[c] + (1) Phylloquinone[c]	(1) cpd00017[c] + (1) cpd09410[c] --> (1) cpd00019[c] + (1) cpd00067[c] + (1) cpd01401[c]	0,10000	Ubiquinone biosynthesis
rxn02831	O-Succinylbenzoate:CoA ligase (AMP-forming)	6.2.1.26	slr0492	(1) ATP[c] + (1) CoA[c] + (1) H+[c] + (1) Succinylbenzoate[c] --> (1) PPi[c] + (1) AMP[c] + (1) Succinylbenzoyl-CoA[c]	(1) cpd00002[c] + (1) cpd00010[c] + (1) cpd00067[c] + (1) cpd01772[c] --> (1) cpd00012[c] + (1) cpd00018[c] + (1) cpd02021[c]	0,10000	Ubiquinone biosynthesis
rxn00967	UDPglucose:4-hydroxybenzoate 4-O-beta-D-glucosyltransferase	3.1.3.4		(1) UDP-glucose[c] + (1) 4-Hydroxybenzoate[c] <=> (1) UDP[c] + (1) 4-(beta-D-Glucosyloxy)benzoate[c]	(1) cpd00026[c] + (1) cpd00136[c] <=> (1) cpd00014[c] + (1) cpd02476[c]	-10000,10000	Ubiquinone and other terpenoid-quinone biosynthesis
rxn04673	1,4-dihydroxy-2-naphthoate phytyltransferase	2.5.1.-	slr1518	(2) Oxidized ferredoxin[c] + (1) Phytyl diphosphate[c] + (1) 1-4-Dihydroxy-2-naphthoate[c] --> (1) H+[c] + (1) CO2[c] + (1) PPi[c] + (2) Reduced ferredoxin[c] + (1) Demethylphylloquinone[c]	(2) cpfdxo22[c] + (1) cpd03214[c] + (1) cpd02295[c] --> (1) cpd00067[c] + (1) cpd00011[c] + (1) cpd00012[c] + (2) cpfdxr22[c] + (1) cpd09410[c]	0,10000	Ubiquinone and other pterpenoids biosynthesis
rxn07331	homogenitisate phytyltransferase	2.5.9.-	slr1736	(1) H+[c] + (1) Homogentisate[c] + (1) Phytyl diphosphate[c] --> (1) CO2[c] + (1) PPi[c] + (1) 2-Methyl-6-phytylquinol[c]	(1) cpd00067[c] + (1) cpd00426[c] + (1) cpd03214[c] --> (1) cpd00011[c] + (1) cpd00012[c] + (1) cpd14613[c]	0,10000	Ubiquinone and other pterpenoids biosynthesis
rxn01682	(1S,2R)-1-C-(indol-3-yl)glycerol 3-phosphate	4.2.1.20	slr0966 and slr0543	(1) Indoleglycerol phosphate[c] <=> (1) Glyceraldehyde3-phosphate[c] + (1) Indole[c]	(1) cpd02210[c] <=> (1) cpd00102[c] + (1) cpd00359[c]	-10000,10000	Tyrosine, Tryptophan, and Phenylalanine Metabolism
rxn01827	4-Hydroxyphenylpyruvate:oxygen oxidoreductase	1.13.11.27	slr0090	(1) O2[c] + (1) p-hydroxyphenylpyruvate[c] --> (1) CO2[c] + (1) Homogentisate[c]	(1) cpd00007[c] + (1) cpd00868[c] --> (1) cpd00011[c] + (1) cpd00426[c]	0,10000	Tyrosine metabolism
rxn03333	3,4-Dihydroxyphenylethyleneglycol:NAD+ oxidoreductase	1.1.1.1	sll0990	(1) NAD[c] + (1) 3,4-Dihydroxyphenylethyleneglycol[c] <=> (1) NADH[c] + (1) H+[c] + (1) 3,4-Dihydroxymandelaldehyde[c]	(1) cpd00003[c] + (1) cpd03306[c] <=> (1) cpd00004[c] + (1) cpd00067[c] + (1) cpd03307[c]	-10000,10000	Tyrosine metabolism
rxn06448	L-Tryptophan -tRNA(Trp) ligase (AMP-forming)	6.1.1.2	slr1884	(1) ATP[c] + (1) L-Tryptophan[c] + (1) H+[c] + (1) tRNA(Trp)[c] --> (1) PPi[c] + (1) AMP[c] + (1) L-Tryptophanyl-tRNA(Trp)[c]	(1) cpd00002[c] + (1) cpd00065[c] + (1) cpd00067[c] + (1) cpd11923[c] --> (1) cpd00012[c] + (1) cpd00018[c] + (1) cpd12336[c]	0,10000	Tryptophan metabolism, Aminoacyl-tRNA biosynthesis
rxn02219	3-Indoleacetonitrile aminohydrolase	3.5.5.1	sll0784	(2) H2O[c] + (1) 3-Indoleacetonitrile[c] --> (1) NH3[c] + (1) Indoleacetate[c]	(2) cpd00001[c] + (1) cpd01881[c] --> (1) cpd00013[c] + (1) cpd00703[c]	0,10000	Tryptophan metabolism
rxn02222	Indole-3-acetamide amidohydrolase	3.5.1.4	sll0828	(1) H2O[c] + (1) Indole-3-acetamide[c] --> (1) NH3[c] + (1) Indoleacetate[c]	(1) cpd00001[c] + (1) cpd01747[c] --> (1) cpd00013[c] + (1) cpd00703[c]	0,10000	Tryptophan metabolism
rxn01937	Indole-3-acetaldehyde:NAD+ oxidoreductase		slr0091	(1) H2O[c] + (1) NAD[c] + (1) Indoleacetaldehyde[c] --> (1) NADH[c] + (2) H+[c] + (1) Indoleacetate[c]	(1) cpd00001[c] + (1) cpd00003[c] + (1) cpd00486[c] --> (1) cpd00004[c] + (2) cpd00067[c] + (1) cpd00703[c]	0,10000	Tryptophan metabolism
rxn04989	L-phenylalanine,tetrahydrobiopterin:oxygen	1.14.16.1		(1) O2[c] + (1) L-Phenylalanine[c] + (1) Tetrahydrobiopterin[c] --> (1) L-Tyrosine[c] + (1) 4a-Hydroxytetrahydrobiopterin[c]	(1) cpd00007[c] + (1) cpd00066[c] + (1) cpd00233[c] --> (1) cpd00069[c] + (1) cpd03897[c]	0,10000	Tryptophan metabolism
rxn01418	2-Oxoadipate:lipoamde 2-oxidoreductase(decarboxylating and	1.8.1.4	slr1096	(1) NAD[c] + (1) CoA[c] + (1) 2-Oxoadipate[c] <=> (1) NADH[c] + (1) CO2[c] + (1) Glutaryl-CoA[c]	(1) cpd00003[c] + (1) cpd00010[c] + (1) cpd00269[c] <=> (1) cpd00004[c] + (1) cpd00011[c] + (1) cpd00413[c]	-10000,10000	Tryptophan metabolism
rxn03236	4a-hydroxytetrahydrobiopterin hydro-lyase	4.2.1.96	ssl2296	(1) 4a-Hydroxytetrahydrobiopterin[c] <=> (1) H2O[c] + (1) Dihydrobiopterin[c]	(1) cpd03897[c] <=> (1) cpd00001[c] + (1) cpd00231[c]	-10000,10000	Tryptophan metabolism
NO3abcpp	Nitrate transport via ABC system (periplasm)		(sll1450 and sll1452 and sll1453)	(1) ATP[c] + (1) H2O[c] + (1) Nitrate[p] --> (1) ADP[c] + (1) H+[c] + (1) Phosphate[c] + (1) Nitrate[c]	(1) cpd00002[c] + (1) cpd00001[c] + (1) cpd00209[p] --> (1) cpd00008[c] + (1) cpd00067[c] + (1) cpd00009[c] + (1) cpd00209[c]	0,10000	Transport
rxn08151	L-arginine transport via ABC system (periplasm)		(slr1735 and sll1270)	(1) H2O[c] + (1) ATP[c] + (1) L-Arginine[p] --> (1) ADP[c] + (1) Phosphate[c] + (1) L-Arginine[c] + (1) H+[c]	(1) cpd00001[c] + (1) cpd00002[c] + (1) cpd00051[p] --> (1) cpd00008[c] + (1) cpd00009[c] + (1) cpd00051[c] + (1) cpd00067[c]	0,10000	Transport
rxn08853	L-lysine transport via ABC system (periplasm)		(slr1735 and sll1270)	(1) H2O[c] + (1) ATP[c] + (1) L-Lysine[p] --> (1) ADP[c] + (1) Phosphate[c] + (1) L-Lysine[c] + (1) H+[c]	(1) cpd00001[c] + (1) cpd00002[c] + (1) cpd00039[p] --> (1) cpd00008[c] + (1) cpd00009[c] + (1) cpd00039[c] + (1) cpd00067[c]	0,10000	Transport
NH3tpp	Ammonia (ireversible) transport pp		(sll0108 or sll0537 or sll1017)	(1) H+[p] + (1) NH3[p] --> (1) H+[c] + (1) NH3[c]	(1) cpd00067[p] + (1) cpd00013[p] --> (1) cpd00067[c] + (1) cpd00013[c]	0,10000	Transport
rxn08987	ammonia ireversible transport (periplasm)		(sll0108) or (sll0537) or (sll1017)	(1) H+[p] + (1) NH3[p] --> (1) H+[c] + (1) NH3[c]	(1) cpd00067[p] + (1) cpd00013[p] --> (1) cpd00067[c] + (1) cpd00013[c]	0,10000	Transport
COBALT2abcpp_syn	Cobalt (Co+2) ABC transporter (periplasm)		(sll0383 and sll0384 and sll0385)	(1) ATP[c] + (1) H2O[c] + (1) Co2+[p] --> (1) ADP[c] + (1) H+[c] + (1) Phosphate[c] + (1) Co2+[c]	(1) cpd00002[c] + (1) cpd00001[c] + (1) cpd00149[p] --> (1) cpd00008[c] + (1) cpd00067[c] + (1) cpd00009[c] + (1) cpd00149[c]	0,10000	Transport
NIabc	Nickle (Ni+2) ABC transporter (periplasm)		(sll0383 and sll0384 and sll0385)	(1) ATP[c] + (1) H2O[c] + (1) Ni2+[p] --> (1) ADP[c] + (1) H+[c] + (1) Phosphate[c] + (1) Ni2+[c]	(1) cpd00002[c] + (1) cpd00001[c] + (1) cpd00244[p] --> (1) cpd00008[c] + (1) cpd00067[c] + (1) cpd00009[c] + (1) cpd00244[c]	0,10000	Transport
Ktpp	Potassium transport pp		(sll0493 and slr1509 and slr1508)	(1) H+[p] + (1) K+[p] --> (1) H+[c] + (1) K+[c]	(1) cpd00067[p] + (1) cpd00205[p] --> (1) cpd00067[c] + (1) cpd00205[c]	0,10000	Transport
rxn08955	molybdate transport via ABC system (periplasm)		(sll0738 and sll0739)	(1) H2O[c] + (1) ATP[c] + (1) Molybdate[p] --> (1) ADP[c] + (1) Phosphate[c] + (1) H+[c] + (1) Molybdate[c]	(1) cpd00001[c] + (1) cpd00002[c] + (1) cpd11574[p] --> (1) cpd00008[c] + (1) cpd00009[c] + (1) cpd00067[c] + (1) cpd11574[c]	0,10000	Transport
rxn08951	manganese (Mn+2) transport in via proton symport (periplasm)		(sll1599) and (sll1600) and (sll1598)	(1) Mn2+[p] + (1) H+[p] --> (1) Mn2+[c] + (1) H+[c]	(1) cpd00030[p] + (1) cpd00067[p] --> (1) cpd00030[c] + (1) cpd00067[c]	0,10000	Transport
Mgtr1	Magnesium (Mg2+) transport via ABC system (periplasm)		(slr0014 or slr1216)	(1) Mg2+[p] + (1) ATP[c] + (1) H2O[c] --> (1) H+[c] + (1) Mg2+[c] + (1) ADP[c] + (1) Phosphate[c]	(1) cpd00254[p] + (1) cpd00002[c] + (1) cpd00001[c] --> (1) cpd00067[c] + (1) cpd00254[c] + (1) cpd00008[c] + (1) cpd00009[c]	0,10000	Transport
rxn08923	Mg transport pp		(slr0014) or (slr1216)	(1) ATP[c] + (1) H2O[c] + (1) Mg2+[p] --> (1) ADP[c] + (1) H+[c] + (1) Phosphate[c] + (1) Mg2+[c]	(1) cpd00002[c] + (1) cpd00001[c] + (1) cpd00254[p] --> (1) cpd00008[c] + (1) cpd00067[c] + (1) cpd00009[c] + (1) cpd00254[c]	0,10000	Transport
HCO3tabc	Bicarbonate transport via ABC system (periplasm)		(slr0040 and slr0041 and slr0043 and slr0044)	(1) ATP[c] + (1) H2O[c] + (1) Bicarbonate[p] --> (1) ADP[c] + (1) H+[c] + (1) Bicarbonate[c] + (1) Phosphate[c]	(1) cpd00002[c] + (1) cpd00001[c] + (1) cpd00242[p] --> (1) cpd00008[c] + (1) cpd00067[c] + (1) cpd00242[c] + (1) cpd00009[c]	0,10000	Transport
UREAabcpp	Urea transport via ABC system (periplasm)		(slr0447 and slr1200 and slr1201 and sll0764 and sll0374)	(1) ATP[c] + (1) H2O[c] + (1) Urea[p] --> (1) ADP[c] + (1) H+[c] + (1) Phosphate[c] + (1) Urea[c]	(1) cpd00002[c] + (1) cpd00001[c] + (1) cpd00073[p] --> (1) cpd00008[c] + (1) cpd00067[c] + (1) cpd00009[c] + (1) cpd00073[c]	0,10000	Transport
GLYabcpp	glycine transport via ABC system		(slr0559 and sll0146 and slr0949 and slr0467 and slr1881)	(1) ATP[c] + (1) H2O[c] + (1) Glycine[p] --> (1) ADP[c] + (1) H+[c] + (1) Phosphate[c] + (1) Glycine[c]	(1) cpd00002[c] + (1) cpd00001[c] + (1) cpd00033[p] --> (1) cpd00008[c] + (1) cpd00067[c] + (1) cpd00009[c] + (1) cpd00033[c]	0,10000	Transport
rxn08097	L-alanine transport via ABC system (periplasm)		(slr0559 and sll0146 and slr0949 and slr0467 and slr1881)	(1) H2O[c] + (1) ATP[c] + (1) L-Alanine[p] --> (1) ADP[c] + (1) Phosphate[c] + (1) L-Alanine[c] + (1) H+[c]	(1) cpd00001[c] + (1) cpd00002[c] + (1) cpd00035[p] --> (1) cpd00008[c] + (1) cpd00009[c] + (1) cpd00035[c] + (1) cpd00067[c]	0,10000	Transport
rxn08784	L-leucine transport via ABC system (periplasm)		(slr0559 and sll0146 and slr0949 and slr0467 and slr1881)	(1) H2O[c] + (1) ATP[c] + (1) L-Leucine[p] --> (1) ADP[c] + (1) Phosphate[c] + (1) H+[c] + (1) L-Leucine[c]	(1) cpd00001[c] + (1) cpd00002[c] + (1) cpd00107[p] --> (1) cpd00008[c] + (1) cpd00009[c] + (1) cpd00067[c] + (1) cpd00107[c]	0,10000	Transport
rxn09187	L-proline transport via ABC system (periplasm)		(slr0559 and sll0146 and slr0949 and slr0467 and slr1881)	(1) H2O[c] + (1) ATP[c] + (1) L-Proline[p] --> (1) ADP[c] + (1) Phosphate[c] + (1) H+[c] + (1) L-Proline[c]	(1) cpd00001[c] + (1) cpd00002[c] + (1) cpd00129[p] --> (1) cpd00008[c] + (1) cpd00009[c] + (1) cpd00067[c] + (1) cpd00129[c]	0,10000	Transport
rxn10883	L-serine transport via ABC system		(slr0559 and sll0146 and slr0949 and slr0467 and slr1881)	(1) H2O[c] + (1) ATP[c] + (1) L-Serine[e] --> (1) ADP[c] + (1) Phosphate[c] + (1) L-Serine[c] + (1) H+[c]	(1) cpd00001[c] + (1) cpd00002[c] + (1) cpd00054[e] --> (1) cpd00008[c] + (1) cpd00009[c] + (1) cpd00054[c] + (1) cpd00067[c]	0,10000	Transport
rxn08624	L-glutamine transport via ABC system (periplasm)		(slr0559 and sll0146 and slr0949 and slr0467 and slr1881) or (slr1735 and sll1270)	(1) H2O[c] + (1) ATP[c] + (1) L-Glutamine[p] --> (1) ADP[c] + (1) Phosphate[c] + (1) L-Glutamine[c] + (1) H+[c]	(1) cpd00001[c] + (1) cpd00002[c] + (1) cpd00053[p] --> (1) cpd00008[c] + (1) cpd00009[c] + (1) cpd00053[c] + (1) cpd00067[c]	0,10000	Transport
rxn08718	L-histidine transport via ABC system (periplasm)		(slr0559 and sll0146 and slr0949 and slr0467 and slr1881) or (slr1735 and sll1270)	(1) H2O[c] + (1) ATP[c] + (1) L-Histidine[p] --> (1) ADP[c] + (1) Phosphate[c] + (1) H+[c] + (1) L-Histidine[c]	(1) cpd00001[c] + (1) cpd00002[c] + (1) cpd00119[p] --> (1) cpd00008[c] + (1) cpd00009[c] + (1) cpd00067[c] + (1) cpd00119[c]	0,10000	Transport
GLCGLYCabcpp_syn	Glucosylglycerol ABC transporter (periplasm)		(slr0747 and slr0529 and slr0530 and slr0531)	(1) ATP[c] + (1) H2O[c] + (1) 2-(beta-D-Glucosyl)-sn-glycerol[p] --> (1) ADP[c] + (1) H+[c] + (1) Phosphate[c] + (1) 2-(beta-D-Glucosyl)-sn-glycerol[c]	(1) cpd00002[c] + (1) cpd00001[c] + (1) cpd08376[p] --> (1) cpd00008[c] + (1) cpd00067[c] + (1) cpd00009[c] + (1) cpd08376[c]	0,10000	Transport
SUCRabcpp_syn	sucrose ABC transporter (periplasm)		(slr0747 and slr0529 and slr0530 and slr0531)	(1) ATP[c] + (1) H2O[c] + (1) Sucrose[p] --> (1) ADP[c] + (1) H+[c] + (1) Phosphate[c] + (1) Sucrose[c]	(1) cpd00002[c] + (1) cpd00001[c] + (1) cpd00076[p] --> (1) cpd00008[c] + (1) cpd00067[c] + (1) cpd00009[c] + (1) cpd00076[c]	0,10000	Transport
rxn05195	Fe3+-ABC transport		(slr1295 and slr0327 and sll1878) or (slr0513 and slr0327 and sll1878)	(1) H2O[c] + (1) ATP[c] + (1) Fe3+[e] --> (1) ADP[c] + (1) Phosphate[c] + (1) H+[c] + (1) Fe3+[c]	(1) cpd00001[c] + (1) cpd00002[c] + (1) cpd10516[e] --> (1) cpd00008[c] + (1) cpd00009[c] + (1) cpd00067[c] + (1) cpd10516[c]	0,10000	Transport
molybtr	Inducible molybdate transport system	Undetermined	(slr1452 and slr1453 and slr1454 and slr1455)	(1) H2O[c] + (1) ATP[c] + (1) Glyceollin[p] --> (1) ADP[c] + (1) Phosphate[c] + (1) Glyceollin[c] + (1) H+[c]	(1) cpd00001[c] + (1) cpd00002[c] + (1) cpd01174[p] --> (1) cpd00008[c] + (1) cpd00009[c] + (1) cpd01174[c] + (1) cpd00067[c]	0,10000	Transport
H2CO3_NAt_syn	Bicarbonate transport (Na/HCO3 cotransport periplasme)		(slr1512 or sll0834)	(1) Na+[p] + (1) Bicarbonate[p] --> (1) Bicarbonate[c] + (1) Na+[c]	(1) cpd00971[p] + (1) cpd00242[p] --> (1) cpd00242[c] + (1) cpd00971[c]	0,10000	Transport
rxn09392	zinc (Zn+2) transport via ABC system (periplasm)		(slr2043) and (slr2045) and (slr2044)	(1) H2O[c] + (1) ATP[c] + (1) Zn2+[p] --> (1) ADP[c] + (1) Phosphate[c] + (1) Zn2+[c] + (1) H+[c]	(1) cpd00001[c] + (1) cpd00002[c] + (1) cpd00034[p] --> (1) cpd00008[c] + (1) cpd00009[c] + (1) cpd00034[c] + (1) cpd00067[c]	0,10000	Transport
NDH1_4pp	Active co2 transporter facilitator (periplasm)		sll0519 and sll0223 and slr1279 and sll0522 and sll0521 and slr0261 and sll0520 and slr1281 and (slr1280 or sll8031) and slr1623 and sll1262 and sll1220 and sll1221 and sll1223 and sll0027 and sll0026 and slr1302	(3) H+[c] + (1) H2O[c] + (1) NADPH[c] + (1) Plastoquinone 9[p] + (1) CO2[p] --> (1) NADP[c] + (1) Bicarbonate[c] + (3) H+[p] + (1) Plastoquinol-9[p]	(3) cpd00067[c] + (1) cpd00001[c] + (1) cpd00005[c] + (1) cpd07274[p] + (1) cpd00011[p] --> (1) cpd00006[c] + (1) cpd00242[c] + (3) cpd00067[p] + (1) cpd16503[p]	0,10000	Transport
NDH1_3u	Active co2 transporter facilitator (tilacoide)		sll0519 and sll0223 and slr1279 and sll0522 and sll0521 and slr0261 and sll0520 and slr1281 and (slr1280 or sll8031) and slr1623 and sll1262 and sll1220 and sll1221 and sll1223 and sll1733 and sll1732 and sll1734 and sll1735	(3) H+[c] + (1) H2O[c] + (1) NADPH[c] + (1) Plastoquinone 9[l] + (1) CO2[p] --> (1) NADP[c] + (1) Bicarbonate[c] + (3) H+[l] + (1) Plastoquinol-9[l]	(3) cpd00067[c] + (1) cpd00001[c] + (1) cpd00005[c] + (1) cpd07274[l] + (1) cpd00011[p] --> (1) cpd00006[c] + (1) cpd00242[c] + (3) cpd00067[l] + (1) cpd16503[l]	0,10000	Transport
FRUt3	D-fructose transport in via proton symport (periplasm)		sll0771	(1) H+[p] + (1) D-Fructose[p] --> (1) H+[c] + (1) D-Fructose[c]	(1) cpd00067[p] + (1) cpd00082[p] --> (1) cpd00067[c] + (1) cpd00082[c]	0,10000	Transport
rxn08472	iron (II) transport via ABC system (periplasm)		sll1392	(1) H2O[c] + (1) ATP[c] + (1) Fe2+[p] --> (1) ADP[c] + (1) Phosphate[c] + (1) H+[c] + (1) Fe2+[c]	(1) cpd00001[c] + (1) cpd00002[c] + (1) cpd10515[p] --> (1) cpd00008[c] + (1) cpd00009[c] + (1) cpd00067[c] + (1) cpd10515[c]	0,10000	Transport
rxn10447	calcium transport via ABC system		sll1614	(1) H2O[c] + (1) ATP[c] + (1) Ca2+[e] --> (1) ADP[c] + (1) Phosphate[c] + (1) Ca2+[c] + (1) H+[c]	(1) cpd00001[c] + (1) cpd00002[c] + (1) cpd00063[e] --> (1) cpd00008[c] + (1) cpd00009[c] + (1) cpd00063[c] + (1) cpd00067[c]	0,10000	Transport
rxn10481_l	Copper (Cu+2) ABC transporter (periplasm)		sll1920	(1) H2O[c] + (1) ATP[c] + (1) Cu2+[c] --> (1) ADP[c] + (1) Phosphate[c] + (1) Cu2+[l] + (1) H+[c]	(1) cpd00001[c] + (1) cpd00002[c] + (1) cpd00058[c] --> (1) cpd00008[c] + (1) cpd00009[c] + (1) cpd00058[l] + (1) cpd00067[c]	0,10000	Transport
rxn08239	Cobalt (Co+2) ABC transporter (periplasm)		slr0797	(1) H2O[c] + (1) ATP[c] + (1) Co2+[c] --> (1) ADP[c] + (1) Phosphate[c] + (1) H+[c] + (1) Co2+[p]	(1) cpd00001[c] + (1) cpd00002[c] + (1) cpd00149[c] --> (1) cpd00008[c] + (1) cpd00009[c] + (1) cpd00067[c] + (1) cpd00149[p]	0,10000	Transport
rxn09388	Zinc (Zn+2) ABC transporter (periplasm)		slr0798	(1) H2O[c] + (1) ATP[c] + (1) Zn2+[c] --> (1) ADP[c] + (1) Phosphate[c] + (1) Zn2+[p] + (1) H+[c]	(1) cpd00001[c] + (1) cpd00002[c] + (1) cpd00034[c] --> (1) cpd00008[c] + (1) cpd00009[c] + (1) cpd00034[p] + (1) cpd00067[c]	0,10000	Transport
rxn10481	Copper transport via ABC system		slr1950	(1) H2O[c] + (1) ATP[c] + (1) Cu2+[e] --> (1) ADP[c] + (1) Phosphate[c] + (1) Cu2+[c] + (1) H+[c]	(1) cpd00001[c] + (1) cpd00002[c] + (1) cpd00058[e] --> (1) cpd00008[c] + (1) cpd00009[c] + (1) cpd00058[c] + (1) cpd00067[c]	0,10000	Transport
2pgctr	Diffusion transport			(1) 2-Phosphoglycolate[ca] --> (1) 2-Phosphoglycolate[c]	(1) cpd00727[ca] --> (1) cpd00727[c]	0,10000	Transport
3pgctr	Diffusion transport			(1) 3-Phosphoglycerate[ca] --> (1) 3-Phosphoglycerate[c]	(1) cpd00169[ca] --> (1) cpd00169[c]	0,10000	Transport
BIOMASStex	Biomass transport ext			(1) Biomass[p] --> (1) Biomass[e]	(1) cpd11416[p] --> (1) cpd11416[e]	0,10000	Transport
Biomasstpp	Biomass transport pp			(1) Biomass[c] --> (1) Biomass[p]	(1) cpd11416[c] --> (1) cpd11416[p]	0,10000	Transport
Glycogentr	Glycogen transport			(1) Glycogen[e] --> (1) Glycogen[c]	(1) cpd00155[e] --> (1) cpd00155[c]	0,10000	Transport
HCO3ctr	Diffusion transport			(1) Bicarbonate[c] --> (1) Bicarbonate[ca]	(1) cpd00242[c] --> (1) cpd00242[ca]	0,10000	Transport
Iptr	Isoprene transport via diffusion (cytoplasm to extracellular)			(1) Isoprene[c] --> (1) Isoprene[e]	(1) cpd16336[c] --> (1) cpd16336[e]	0,10000	Transport
Rubpctr	Diffusion transport			(1) D-Ribulose 1,5-bisphosphate[c] --> (1) D-Ribulose 1,5-bisphosphate[ca]	(1) cpd00871[c] --> (1) cpd00871[ca]	0,10000	Transport
rxn08238	CO2 transporter via diffusion (periplasm)			(1) CO2[c] --> (1) CO2[p]	(1) cpd00011[c] --> (1) cpd00011[p]	0,10000	Transport
rxn09213	putrescine transport via ABC system (periplasm)			(1) H2O[c] + (1) ATP[c] + (1) Putrescine[p] --> (1) ADP[c] + (1) Phosphate[c] + (1) H+[c] + (1) Putrescine[c]	(1) cpd00001[c] + (1) cpd00002[c] + (1) cpd00118[p] --> (1) cpd00008[c] + (1) cpd00009[c] + (1) cpd00067[c] + (1) cpd00118[c]	0,10000	Transport
rxn09215	putrescine transport in via proton symport			(1) H+[p] + (1) Putrescine[p] --> (1) H+[c] + (1) Putrescine[c]	(1) cpd00067[p] + (1) cpd00118[p] --> (1) cpd00067[c] + (1) cpd00118[c]	0,10000	Transport
rxn09263	spermidine transport via ABC system (periplasm)			(1) H2O[c] + (1) ATP[c] + (1) Spermidine[p] --> (1) ADP[c] + (1) Phosphate[c] + (1) H+[c] + (1) Spermidine[c]	(1) cpd00001[c] + (1) cpd00002[c] + (1) cpd00264[p] --> (1) cpd00008[c] + (1) cpd00009[c] + (1) cpd00067[c] + (1) cpd00264[c]	0,10000	Transport
SPMDt2pp	spermidine transport in via proton symport			(1) H+[p] + (1) Spermidine[p] --> (1) H+[c] + (1) Spermidine[c]	(1) cpd00067[p] + (1) cpd00264[p] --> (1) cpd00067[c] + (1) cpd00264[c]	0,10000	Transport
rxn08984	sodium transport out via proton antiport (cytoplasm to periplasm)		(slr1727 or sll0273 or slr1595 or sll0689 or slr0415 or sll0556)	(1) H+[p] + (1) Na+[c] <=> (1) H+[c] + (1) Na+[p]	(1) cpd00067[p] + (1) cpd00971[c] <=> (1) cpd00067[c] + (1) cpd00971[p]	-10000,10000	Transport
rxn08632	Na+/glutamate symport (periplasm)		slr1145	(1) L-Glutamate[p] + (1) Na+[p] <=> (1) L-Glutamate[c] + (1) Na+[c]	(1) cpd00023[p] + (1) cpd00971[p] <=> (1) cpd00023[c] + (1) cpd00971[c]	-10000,10000	Transport
rxn08185	calcium (Ca+2) transport out via proton antiport (periplasm)		slr1336	(1) Ca2+[c] + (1) H+[p] <=> (1) Ca2+[p] + (1) H+[c]	(1) cpd00063[c] + (1) cpd00067[p] <=> (1) cpd00063[p] + (1) cpd00067[c]	-10000,10000	Transport
H2Oltr	Water transport ltr		slr2057	(1) H2O[c] <=> (1) H2O[l]	(1) cpd00001[c] <=> (1) cpd00001[l]	-10000,10000	Transport
rxn08687	Water transport pp		slr2057	(1) H2O[p] <=> (1) H2O[c]	(1) cpd00001[p] <=> (1) cpd00001[c]	-10000,10000	Transport
AKGtpp	2-Oxoglutarate transport pp			(1) H+[p] + (1) 2-Oxoglutarate[p] <=> (1) H+[c] + (1) 2-Oxoglutarate[c]	(1) cpd00067[p] + (1) cpd00024[p] <=> (1) cpd00067[c] + (1) cpd00024[c]	-10000,10000	Transport
CITtpp	Citrate transport pp			(1) H+[p] + (1) Citrate[p] <=> (1) H+[c] + (1) Citrate[c]	(1) cpd00067[p] + (1) cpd00137[p] <=> (1) cpd00067[c] + (1) cpd00137[c]	-10000,10000	Transport
COtex	co transport via diffusion (extracellular to periplasm)			(1) CO[e] <=> (1) CO[p]	(1) cpd00204[e] <=> (1) cpd00204[p]	-10000,10000	Transport
Cotpp	Cobalt transport pp			(1) Co2+[p] <=> (1) Co2+[c]	(1) cpd00149[p] <=> (1) cpd00149[c]	-10000,10000	Transport
CU2tex	copper (Cu+2) transport via diffusion (extracellular to periplasm)			(1) Cu2+[e] <=> (1) Cu2+[p]	(1) cpd00058[e] <=> (1) cpd00058[p]	-10000,10000	Transport
FUMtpp	Fumarate transport pp			(1) H+[p] + (1) Fumarate[p] <=> (1) H+[c] + (1) Fumarate[c]	(1) cpd00067[p] + (1) cpd00106[p] <=> (1) cpd00067[c] + (1) cpd00106[c]	-10000,10000	Transport
GLCGLYCtex	2-(beta-D-Glucosyl)-sn-glycerol transport ext			(1) 2-(beta-D-Glucosyl)-sn-glycerol[e] <=> (1) 2-(beta-D-Glucosyl)-sn-glycerol[p]	(1) cpd08376[e] <=> (1) cpd08376[p]	-10000,10000	Transport
GLCtex	Glucose transport ext			(1) D-Glucose[e] <=> (1) D-Glucose[p]	(1) cpd00027[e] <=> (1) cpd00027[p]	-10000,10000	Transport
H+ctr	Diffusion transport			(1) H+[c] <=> (1) H+[ca]	(1) cpd00067[c] <=> (1) cpd00067[ca]	-10000,10000	Transport
H+tex	Proton transport ext			(1) H+[e] <=> (1) H+[p]	(1) cpd00067[e] <=> (1) cpd00067[p]	-10000,10000	Transport
H2Octr	Diffusion transport			(1) H2O[c] <=> (1) H2O[ca]	(1) cpd00001[c] <=> (1) cpd00001[ca]	-10000,10000	Transport
HCO3tex	Bicarbonate transport ext			(1) Bicarbonate[e] <=> (1) Bicarbonate[p]	(1) cpd00242[e] <=> (1) cpd00242[p]	-10000,10000	Transport
Kex	Potasium transport via diffusion (extracellular to periplasm)			(1) K+[e] <=> (1) K+[p]	(1) cpd00205[e] <=> (1) cpd00205[p]	-10000,10000	Transport
MALtpp	Malate transport pp			(1) H+[p] + (1) L-Malate[p] <=> (1) H+[c] + (1) L-Malate[c]	(1) cpd00067[p] + (1) cpd00130[p] <=> (1) cpd00067[c] + (1) cpd00130[c]	-10000,10000	Transport
O2ctr	Diffusion transport			(1) O2[c] <=> (1) O2[ca]	(1) cpd00007[c] <=> (1) cpd00007[ca]	-10000,10000	Transport
O2ltr	Oxygen transport ltr			(1) O2[c] <=> (1) O2[l]	(1) cpd00007[c] <=> (1) cpd00007[l]	-10000,10000	Transport
O2tpp	Oxygen transport pp			(1) O2[p] <=> (1) O2[c]	(1) cpd00007[p] <=> (1) cpd00007[c]	-10000,10000	Transport
PHOtex1	Photon transport ext			(1) Photosystem 1 photon[e] <=> (1) Photosystem 1 photon[p]	(1) hvphoton1[e] <=> (1) hvphoton1[p]	-10000,10000	Transport
PHOtex2	Photon transport ext			(1) Photosystem 2 photon[e] <=> (1) Photosystem 2 photon[p]	(1) hvphoton2[e] <=> (1) hvphoton2[p]	-10000,10000	Transport
PHOtpp1	Photon transport pp			(1) Photosystem 1 photon[p] <=> (1) Photosystem 1 photon[c]	(1) hvphoton1[p] <=> (1) hvphoton1[c]	-10000,10000	Transport
PHOtpp2	Photon transport pp			(1) Photosystem 2 photon[p] <=> (1) Photosystem 2 photon[c]	(1) hvphoton2[p] <=> (1) hvphoton2[c]	-10000,10000	Transport
PYRtpp	Pyruvate transport pp			(1) H+[p] + (1) Pyruvate[p] <=> (1) H+[c] + (1) Pyruvate[c]	(1) cpd00067[p] + (1) cpd00020[p] <=> (1) cpd00067[c] + (1) cpd00020[c]	-10000,10000	Transport
rxn08061	acetate reversible transport via proton symport (periplasm)			(1) Acetate[p] + (1) H+[p] <=> (1) Acetate[c] + (1) H+[c]	(1) cpd00029[p] + (1) cpd00067[p] <=> (1) cpd00029[c] + (1) cpd00067[c]	-10000,10000	Transport
rxn08063	Acetate transport via diffusion (extracellular to periplasm)			(1) Acetate[e] <=> (1) Acetate[p]	(1) cpd00029[e] <=> (1) cpd00029[p]	-10000,10000	Transport
rxn08096	alpha-ketoglutarate transport via diffusion (extracellular to periplasm)			(1) 2-Oxoglutarate[e] <=> (1) 2-Oxoglutarate[p]	(1) cpd00024[e] <=> (1) cpd00024[p]	-10000,10000	Transport
rxn08104	L-alanine transport via diffusion (extracellular to periplasm)			(1) L-Alanine[e] <=> (1) L-Alanine[p]	(1) cpd00035[e] <=> (1) cpd00035[p]	-10000,10000	Transport
rxn08155	L-arginine transport via diffusion (extracellular to periplasm)			(1) L-Arginine[e] <=> (1) L-Arginine[p]	(1) cpd00051[e] <=> (1) cpd00051[p]	-10000,10000	Transport
rxn08186	calcium (Ca+2) transport via diffusion (extracellular to periplasm)			(1) Ca2+[e] <=> (1) Ca2+[p]	(1) cpd00063[e] <=> (1) cpd00063[p]	-10000,10000	Transport
rxn08217	citrate transport via diffusion (extracellular to periplasm)			(1) Citrate[e] <=> (1) Citrate[p]	(1) cpd00137[e] <=> (1) cpd00137[p]	-10000,10000	Transport
rxn08237	CO2 transport ext			(1) CO2[e] <=> (1) CO2[c]	(1) cpd00011[e] <=> (1) cpd00011[c]	-10000,10000	Transport
rxn08241	cobalt (Co+2) transport via diffusion (extracellular to periplasm)			(1) Co2+[e] <=> (1) Co2+[p]	(1) cpd00149[e] <=> (1) cpd00149[p]	-10000,10000	Transport
rxn08278	Cyanate transport via proton symport (periplasm)			(1) H+[p] + (1) Cyanate[p] <=> (1) H+[c] + (1) Cyanate[c]	(1) cpd00067[p] + (1) cpd01015[p] <=> (1) cpd00067[c] + (1) cpd01015[c]	-10000,10000	Transport
rxn08279	Cyanate transport via diffusion (extracellular to periplasm)			(1) Cyanate[e] <=> (1) Cyanate[p]	(1) cpd01015[e] <=> (1) cpd01015[p]	-10000,10000	Transport
rxn08475	iron (II) transport via diffusion (extracellular to periplasm)			(1) Fe2+[e] <=> (1) Fe2+[p]	(1) cpd10515[e] <=> (1) cpd10515[p]	-10000,10000	Transport
rxn08492	iron (III) transport via diffusion (extracellular to periplasm)			(1) Fe3+[e] <=> (1) Fe3+[p]	(1) cpd10516[e] <=> (1) cpd10516[p]	-10000,10000	Transport
rxn08537	D-fructose transport via diffusion (extracellular to periplasm)			(1) D-Fructose[e] <=> (1) D-Fructose[p]	(1) cpd00082[e] <=> (1) cpd00082[p]	-10000,10000	Transport
rxn08544	Fumarate transport via diffusion (extracellular to periplasm)			(1) Fumarate[e] <=> (1) Fumarate[p]	(1) cpd00106[e] <=> (1) cpd00106[p]	-10000,10000	Transport
rxn08625	L-glutamine transport via diffusion (extracellular to periplasm)			(1) L-Glutamine[e] <=> (1) L-Glutamine[p]	(1) cpd00053[e] <=> (1) cpd00053[p]	-10000,10000	Transport
rxn08633	L-glutamate transport via diffusion (extracellular to periplasm)			(1) L-Glutamate[e] <=> (1) L-Glutamate[p]	(1) cpd00023[e] <=> (1) cpd00023[p]	-10000,10000	Transport
rxn08662	Glycine transport via diffusion (extracellular to periplasm)			(1) Glycine[e] <=> (1) Glycine[p]	(1) cpd00033[e] <=> (1) cpd00033[p]	-10000,10000	Transport
rxn08686	Water transport ext			(1) H2O[e] <=> (1) H2O[p]	(1) cpd00001[e] <=> (1) cpd00001[p]	-10000,10000	Transport
rxn08691	Hydrogen transport ext			(1) H2[e] <=> (1) H2[p]	(1) cpd11640[e] <=> (1) cpd11640[p]	-10000,10000	Transport
rxn08692	Hydrogen transport pp			(1) H2[p] <=> (1) H2[c]	(1) cpd11640[p] <=> (1) cpd11640[c]	-10000,10000	Transport
rxn08721	L-histidine transport via diffusion (extracellular to periplasm)			(1) L-Histidine[e] <=> (1) L-Histidine[p]	(1) cpd00119[e] <=> (1) cpd00119[p]	-10000,10000	Transport
rxn08786	L-leucine transport via diffusion (extracellular to periplasm)			(1) L-Leucine[e] <=> (1) L-Leucine[p]	(1) cpd00107[e] <=> (1) cpd00107[p]	-10000,10000	Transport
rxn08856	L-lysine transport via diffusion (extracellular to periplasm)			(1) L-Lysine[e] <=> (1) L-Lysine[p]	(1) cpd00039[e] <=> (1) cpd00039[p]	-10000,10000	Transport
rxn08868	Malate transport via diffusion (extracellular to periplasm)			(1) L-Malate[e] <=> (1) L-Malate[p]	(1) cpd00130[e] <=> (1) cpd00130[p]	-10000,10000	Transport
rxn08922	magnesium (Mg+2) transport via diffusion (extracellular to periplasm)			(1) Mg2+[e] <=> (1) Mg2+[p]	(1) cpd00254[e] <=> (1) cpd00254[p]	-10000,10000	Transport
rxn08952	Manganese (Mn+2) transport via diffusion (extracellular to periplasm)			(1) Mn2+[e] <=> (1) Mn2+[p]	(1) cpd00030[e] <=> (1) cpd00030[p]	-10000,10000	Transport
rxn08956	molybdate transport via diffusion (extracellular to periplasm)			(1) Molybdate[e] <=> (1) Molybdate[p]	(1) cpd11574[e] <=> (1) cpd11574[p]	-10000,10000	Transport
rxn08985	sodium transport via diffusion (extracellular to periplasm)			(1) Na+[e] <=> (1) Na+[p]	(1) cpd00971[e] <=> (1) cpd00971[p]	-10000,10000	Transport
rxn08986	ammonia transport via diffusion (extracellular to periplasm)			(1) NH3[e] <=> (1) NH3[p]	(1) cpd00013[e] <=> (1) cpd00013[p]	-10000,10000	Transport
rxn08991	nickel transport via diffusion (extracellular to periplasm)			(1) Ni2+[e] <=> (1) Ni2+[p]	(1) cpd00244[e] <=> (1) cpd00244[p]	-10000,10000	Transport
rxn09005	nitrate transport via diffusion (extracellular to periplasm)			(1) Nitrate[e] <=> (1) Nitrate[p]	(1) cpd00209[e] <=> (1) cpd00209[p]	-10000,10000	Transport
rxn09031	Oxygen transport ext			(1) O2[e] <=> (1) O2[p]	(1) cpd00007[e] <=> (1) cpd00007[p]	-10000,10000	Transport
rxn09121	phosphate transport via diffusion (extracellular to periplasm)			(1) Phosphate[e] <=> (1) Phosphate[p]	(1) cpd00009[e] <=> (1) cpd00009[p]	-10000,10000	Transport
rxn09193	L-proline transport via diffusion (extracellular to periplasm)			(1) L-Proline[e] <=> (1) L-Proline[p]	(1) cpd00129[e] <=> (1) cpd00129[p]	-10000,10000	Transport
rxn09216	putrescine transport via diffusion (extracellular to periplasm)			(1) Putrescine[e] <=> (1) Putrescine[p]	(1) cpd00118[e] <=> (1) cpd00118[p]	-10000,10000	Transport
rxn09218	pyruvate transport via diffusion (extracellular to periplasm)			(1) Pyruvate[e] <=> (1) Pyruvate[p]	(1) cpd00020[e] <=> (1) cpd00020[p]	-10000,10000	Transport
rxn09248	L-serine transport via diffusion (extracellular to periplasm)			(1) L-Serine[e] <=> (1) L-Serine[p]	(1) cpd00054[e] <=> (1) cpd00054[p]	-10000,10000	Transport
rxn09261	sulfate transport via diffusion (extracellular to periplasm)			(1) Sulfate[e] <=> (1) Sulfate[p]	(1) cpd00048[e] <=> (1) cpd00048[p]	-10000,10000	Transport
rxn09266	spermidine transport via diffusion (extracellular to periplasm)			(1) Spermidine[e] <=> (1) Spermidine[p]	(1) cpd00264[e] <=> (1) cpd00264[p]	-10000,10000	Transport
rxn09271	succinate transport via diffusion (extracellular to periplasm)			(1) Succinate[e] <=> (1) Succinate[p]	(1) cpd00036[e] <=> (1) cpd00036[p]	-10000,10000	Transport
rxn09275	sucrose transport transport via diffusion (extracellular to periplasm)			(1) Sucrose[e] <=> (1) Sucrose[p]	(1) cpd00076[e] <=> (1) cpd00076[p]	-10000,10000	Transport
rxn09368	Urea transport via diffusion (extracellular to periplasm)			(1) Urea[e] <=> (1) Urea[p]	(1) cpd00073[e] <=> (1) cpd00073[p]	-10000,10000	Transport
rxn09390	zinc (Zn+2) transport via diffusion (extracellular to periplasm)			(1) Zn2+[e] <=> (1) Zn2+[p]	(1) cpd00034[e] <=> (1) cpd00034[p]	-10000,10000	Transport
SUCCtpp	Succinate transport pp			(1) H+[p] + (1) Succinate[p] <=> (1) H+[c] + (1) Succinate[c]	(1) cpd00067[p] + (1) cpd00036[p] <=> (1) cpd00067[c] + (1) cpd00036[c]	-10000,10000	Transport
rxn02305	2-Methyl-4-amino-5-hydroxymethylpyrimidine-diphosphate:4-methyl-5-	2.5.1.3	sll0635	(1) H+[c] + (1) 4-Methyl-5--2-phosphoethyl-thiazole[c] + (1) 4-Amino-2-methyl-5-diphosphomethylpyrimidine[c] --> (1) PPi[c] + (1) Thiamine phosphate[c]	(1) cpd00067[c] + (1) cpd02654[c] + (1) cpd02894[c] --> (1) cpd00012[c] + (1) cpd00793[c]	0,10000	Thiamine metabolism
rxn00436	Thiamin diphosphate phosphohydrolase	3.6.1.15	slr0402	(1) H2O[c] + (1) TPP[c] --> (1) Phosphate[c] + (1) H+[c] + (1) Thiamine phosphate[c]	(1) cpd00001[c] + (1) cpd00056[c] --> (1) cpd00009[c] + (1) cpd00067[c] + (1) cpd00793[c]	0,10000	Thiamine metabolism
rxn01538	thiamine kinase	2.7.1.89		(1) ATP[c] + (1) Thiamin[c] --> (1) ADP[c] + (1) Thiamine phosphate[c]	(1) cpd00002[c] + (1) cpd00305[c] --> (1) cpd00008[c] + (1) cpd00793[c]	0,10000	Thiamine metabolism
rxn00438	ATP:thiamin-phosphate phosphotransferase	2.7.4.16	slr1787	(1) ATP[c] + (1) Thiamine phosphate[c] <=> (1) ADP[c] + (1) TPP[c]	(1) cpd00002[c] + (1) cpd00793[c] <=> (1) cpd00008[c] + (1) cpd00056[c]	-10000,10000	Thiamine metabolism
rxn01213	Dimethylallyl-diphosphate:isopentenyl-diphosphate	2.5.1.29	slr0739	(1) Isopentenyldiphosphate[c] + (1) DMAPP[c] --> (1) PPi[c] + (1) Geranyl diphosphate[c]	(1) cpd00113[c] + (1) cpd00202[c] --> (1) cpd00012[c] + (1) cpd00283[c]	0,10000	Terpenoid biosynthesis, Biosynthesis of steroids
rxn01486	trans,trans-Farnesyl-diphosphate:isopentenyl-diphosphate	2.5.1.29	slr0739	(1) Isopentenyldiphosphate[c] + (1) Farnesyldiphosphate[c] --> (1) PPi[c] + (1) Geranylgeranyl diphosphate[c]	(1) cpd00113[c] + (1) cpd00350[c] --> (1) cpd00012[c] + (1) cpd00289[c]	0,10000	Terpenoid biosynthesis, Biosynthesis of steroids
rxn01466	Geranyl-diphosphate:isopentenyl-diphosphate geranyltrans-transferase	2.5.1.10	slr1255	(1) Isopentenyldiphosphate[c] + (1) Geranyl diphosphate[c] --> (1) PPi[c] + (1) Farnesyldiphosphate[c]	(1) cpd00113[c] + (1) cpd00283[c] --> (1) cpd00012[c] + (1) cpd00350[c]	0,10000	Terpenoid biosynthesis, Biosynthesis of steroids
rxn00830	rxn00830			(1) Isopentenyldiphosphate[c] <=> (1) DMAPP[c]	(1) cpd00113[c] <=> (1) cpd00202[c]	-10000,10000	Terpenoid biosynthesis, Biosynthesis of steroids
rxn04308	di-trans,poly-cis-Decaprenyl-diphosphate:isopentenyl-diphosphate	2.5.1.31	sll0506	(7) Isopentenyldiphosphate[c] + (1) trans,trans,cis-Geranylgeranyl diphosphate[c] --> (7) PPi[c] + (1) Bactoprenyl diphosphate[c]	(7) cpd00113[c] + (1) cpd08211[c] --> (7) cpd00012[c] + (1) cpd02229[c]	0,10000	Terpenoid biosynthesis
rxn04147	Squalene synthase	2.5.1.21	sll0513	(1) NADPH[c] + (1) H+[c] + (2) Farnesyldiphosphate[c] --> (1) NADP[c] + (2) PPi[c] + (1) Supraene[c]	(1) cpd00005[c] + (1) cpd00067[c] + (2) cpd00350[c] --> (1) cpd00006[c] + (2) cpd00012[c] + (1) cpd00559[c]	0,10000	Terpenoid biosynthesis
MECDPDH_syn	2C-methyl-D-erythritol 2,4 cyclodiphosphate dehydratase	1.17.7.1	slr2136	(2) Reduced ferredoxin[c] + (1) 2-C-methyl-D-erythritol2-4-cyclodiphosphate[c] + (2) H+[c] --> (1) H2O[c] + (2) Oxidized ferredoxin[c] + (1) 1-Hydroxy-2-methyl-2-butenyl 4-diphosphate[c]	(2) cpfdxr22[c] + (1) cpd08301[c] + (2) cpd00067[c] --> (1) cpd00001[c] + (2) cpfdxo22[c] + (1) cpd08615[c]	0,10000	Terpenoid biosynthesis
R08199	dimethylallyl-diphosphate diphosphate-lyase (isoprene-forming)	4.2.3.27		(1) DMAPP[c] <=> (1) Isoprene[c] + (1) PPi[c]	(1) cpd00202[c] <=> (1) cpd16336[c] + (1) cpd00012[c]	-10000,10000	Terpenoid biosynthesis
rxn00178	Acetyl-CoA:acetyl-CoA C-acetyltransferase		slr1993	(2) Acetyl-CoA[c] --> (1) CoA[c] + (1) Acetoacetyl-CoA[c]	(2) cpd00022[c] --> (1) cpd00010[c] + (1) cpd00279[c]	0,10000	Synthesis and degradation of ketone bodies, Valine,leucine and isoleucine degradation, Fatty acid metabolism, Lysine degradation, Propanoate metabolism, Benzoate degradation via CoA ligation, Butanoate metabolism, Tryptophan metabolism, Pyruvate metabolism
rxn00290	Succinyl-CoA:3-oxo-acid CoA-transferase	2.8.3.5		(1) Succinyl-CoA[c] + (1) Acetoacetate[c] <=> (1) Succinate[c] + (1) Acetoacetyl-CoA[c]	(1) cpd00078[c] + (1) cpd00142[c] <=> (1) cpd00036[c] + (1) cpd00279[c]	-10000,10000	Synthesis and degradation of ketone bodies
rxn00361	ATP:adenylylsulfate 3'-phosphotransferase	2.7.1.25	slr0676	(1) ATP[c] + (1) APS[c] --> (1) ADP[c] + (1) 3-phosphoadenylylsulfate[c]	(1) cpd00002[c] + (1) cpd00193[c] --> (1) cpd00008[c] + (1) cpd00044[c]	0,10000	Sulfur metabolism, Purine metabolism
rxn00379	ATP:sulfate adenylyltransferase	2.7.7.4	slr1165	(1) ATP[c] + (1) Sulfate[c] + (1) H+[c] --> (1) PPi[c] + (1) APS[c]	(1) cpd00002[c] + (1) cpd00048[c] + (1) cpd00067[c] --> (1) cpd00012[c] + (1) cpd00193[c]	0,10000	Sulfur metabolism, Purine metabolism
rxn05902	Hydrogen-sulfide:ferredoxin oxidoreductase	1.8.7.1	slr0963	(7) H+[c] + (1) Sulfite[c] + (6) Reduced ferredoxin[c] --> (3) H2O[c] + (1) Hydrogen Sulfide[c] + (6) Oxidized ferredoxin[c]	(7) cpd00067[c] + (1) cpd00081[c] + (6) cpfdxr22[c] --> (3) cpd00001[c] + (1) cpd00239[c] + (6) cpfdxo22[c]	0,10000	Sulfur metabolism
rxn05239	adenosine 3',5'-bisphosphate,sulfite:oxidized-thioredoxin oxidoreductase	1.8.4.8	slr1791	(1) 3-phosphoadenylylsulfate[c] + (1) Reduced thioredoxin[c] --> (1) Adenosine 3-5-bisphosphate[c] + (1) Sulfite[c] + (1) Oxidized thioredoxin[c]	(1) cpd00044[c] + (1) cpd11421[c] --> (1) cpd00045[c] + (1) cpd00081[c] + (1) cpd11420[c]	0,10000	Sulfur metabolism
rxn11934	AMP,sulfite:(FAD) oxidoreductase	1.8.99.2	slr1791	(1) APS[c] + (1) FADH2[c] --> (1) FAD[c] + (1) AMP[c] + (1) Sulfite[c]	(1) cpd00193[c] + (1) cpd00982[c] --> (1) cpd00015[c] + (1) cpd00018[c] + (1) cpd00081[c]	0,10000	Sulfur metabolism
rxn03983	AMP,sulfite:glutathione-disulfide oxidoreductase	1.8.4.9	slr1791	(1) AMP[c] + (1) Sulfite[c] + (1) Oxidized glutathione[c] <=> (2) Glutathione[c] + (1) APS[c]	(1) cpd00018[c] + (1) cpd00081[c] + (1) cpd00111[c] <=> (2) cpd00042[c] + (1) cpd00193[c]	-10000,10000	Sulfur metabolism
rxn05821	DNA (cytosine-5-)-methyltransferase	2.1.1.37	slr0214	(1) S-Adenosyl-L-methionine[c] + (1) DNA[c] --> (1) S-Adenosyl-homocysteine[c] + (1) DNA 5-methylcytosine[c]	(1) cpd00017[c] + (1) cpd11461[c] --> (1) cpd00019[c] + (1) cpd12223[c]	0,10000	Sulfur Cysteine and methionine metabolism
rxn00952	O-Acetyl-L-homoserine acetate-lyase (adding methanethiol)	2.5.1.49		(1) Hydrogen Sulfide[c] + (1) O-Acetyl-L-homoserine[c] --> (1) H+[c] + (1) Acetate[c] + (1) Homocysteine[c]	(1) cpd00239[c] + (1) cpd00790[c] --> (1) cpd00067[c] + (1) cpd00029[c] + (1) cpd00135[c]	0,10000	Sulfur Cysteine and methionine metabolism
rxn01303	homoserine O-trans-acetylase	2.3.1.31		(1) Acetyl-CoA[c] + (1) L-Homoserine[c] --> (1) CoA[c] + (1) O-Acetyl-L-homoserine[c]	(1) cpd00022[c] + (1) cpd00227[c] --> (1) cpd00010[c] + (1) cpd00790[c]	0,10000	Sulfur Cysteine and methionine metabolism
rxn01843	2-phenylacetamide amidohydrolase	3.5.1.4	sll0828	(1) H2O[c] + (1) H+[c] + (1) 2-Phenylacetamide[c] --> (1) NH3[c] + (1) Phenyl acetate[c]	(1) cpd00001[c] + (1) cpd00067[c] + (1) cpd01647[c] --> (1) cpd00013[c] + (1) cpd00430[c]	0,10000	Styrene degradation, Phenylalanine metabolism
rxn00216	ATP:D-glucose 6-phosphotransferase	2.7.1.1	sll0593	(1) ATP[c] + (1) D-Glucose[c] --> (1) ADP[c] + (1) D-glucose-6-phosphate[c]	(1) cpd00002[c] + (1) cpd00027[c] --> (1) cpd00008[c] + (1) cpd00079[c]	0,10000	Streptomycin biosynthesis, Starch and sucrose metabolism, Galactose metabolism, Glycolysis / Gluconeogenesis
rxn00704	rxn00704			(1) D-Glucose 1-phosphate[c] <=> (1) D-glucose-6-phosphate[c]	(1) cpd00089[c] <=> (1) cpd00079[c]	-10000,10000	Streptomycin biosynthesis, Starch and sucrose metabolism, Galactose metabolism, Glycolysis / Gluconeogenesis
rxn01675	dTTP:alpha-D-glucose-1-phosphate thymidylyltransferase	2.7.7.24	(sll0207 or slr0983)	(1) D-Glucose 1-phosphate[c] + (1) TTP[c] --> (1) PPi[c] + (1) dTDPglucose[c]	(1) cpd00089[c] + (1) cpd00357[c] --> (1) cpd00012[c] + (1) cpd00626[c]	0,10000	Streptomycin biosynthesis, Nucleotide sugars metabolism, Polyketide sugar unit biosynthesis
rxn01997	dTDPglucose 4,6-hydro-lyase	4.2.1.46	(slr0809) or (slr0836)	(1) dTDPglucose[c] --> (1) H2O[c] + (1) dTDP-4-oxo-6-deoxy-D-glucose[c]	(1) cpd00626[c] --> (1) cpd00001[c] + (1) cpd00521[c]	0,10000	Streptomycin biosynthesis, Nucleotide sugars metabolism, Polyketide sugar unit biosynthesis
rxn02000	dTDP-4-dehydro-6-deoxy-D-glucose 3,5-epimerase	5.1.3.13	(slr0985) or (slr1933)	(1) dTDP-4-oxo-6-deoxy-D-glucose[c] --> (1) dTDP-4-oxo-L-rhamnose[c]	(1) cpd00521[c] --> (1) cpd00522[c]	0,10000	Streptomycin biosynthesis, Nucleotide sugars metabolism, Polyketide sugar unit biosynthesis
rxn02003	dTDP-6-deoxy-L-mannose:NADP+ 4-oxidoreductase	1.1.1.133	sll1395	(1) NADPH[c] + (1) H+[c] + (1) dTDP-4-oxo-L-rhamnose[c] --> (1) NADP[c] + (1) dTDP-rhamnose[c]	(1) cpd00005[c] + (1) cpd00067[c] + (1) cpd00522[c] --> (1) cpd00006[c] + (1) cpd02113[c]	0,10000	Streptomycin biosynthesis, Nucleotide sugars metabolism, Polyketide sugar unit biosynthesis
rxn00881	myo-Inositol 1-phosphate phosphahydrolase	3.1.3.25	sll1383	(1) H2O[c] + (1) Inositol 1-phosphate[c] --> (1) Phosphate[c] + (1) H+[c] + (1) L-Inositol[c]	(1) cpd00001[c] + (1) cpd00867[c] --> (1) cpd00009[c] + (1) cpd00067[c] + (1) cpd00121[c]	0,10000	Streptomycin biosynthesis, Inositol phosphate metabolism, Phosphatidylinositol signaling system
rxn00558	D-Glucose-6-phosphate ketol-isomerase	5.3.1.9	slr1349	(1) D-glucose-6-phosphate[c] <=> (1) D-fructose-6-phosphate[c]	(1) cpd00079[c] <=> (1) cpd00072[c]	-10000,10000	Starch and sucrose metabolism, Pentose phosphate pathway, Glycolysis / Gluconeogenesis
rxn00547	ATP:D-fructose 6-phosphotransferase	2.7.1.1	slr1448	(1) ATP[c] + (1) D-Fructose[c] --> (1) ADP[c] + (1) D-fructose-6-phosphate[c]	(1) cpd00002[c] + (1) cpd00082[c] --> (1) cpd00008[c] + (1) cpd00072[c]	0,10000	Starch and sucrose metabolism, Fructose and mannose metabolism
rxn08934	Maltodextrin glucosidase (maltopentaose)	Undetermined	sll1356 or slr1367	(1) H2O[c] + (1) Maltopentaose[c] --> (1) D-Glucose[c] + (1) Maltotetraose[c]	(1) cpd00001[c] + (1) cpd15495[c] --> (1) cpd00027[c] + (1) cpd01399[c]	0,10000	Starch and sucrose metabolism
rxn13643	glycogen synthase (ADPGlc)	2.4.1.21	(sll0945 or sll1393)	(5) ADP-glucose[c] + (1) H2O[c] --> (5) ADP[c] + (1) Glycogen[c]	(5) cpd00387[c] + (1) cpd00001[c] --> (5) cpd00008[c] + (1) cpd00155[c]	0,10000	Starch and sucrose metabolism
GLCP	glycogen phosphorylase	2.4.1.1	(sll1356 or slr1367)	(5) Phosphate[c] + (5) H+[c] + (1) Glycogen[c] --> (5) D-Glucose 1-phosphate[c] + (1) H2O[c]	(5) cpd00009[c] + (5) cpd00067[c] + (1) cpd00155[c] --> (5) cpd00089[c] + (1) cpd00001[c]	0,10000	Starch and sucrose metabolism
GLCP2	glycogen phosphorylase	2.4.1.1	(sll1356 or slr1367)	(5) Phosphate[c] + (5) H+[c] + (1) branching glycogen[c] --> (5) D-Glucose 1-phosphate[c] + (1) H2O[c]	(5) cpd00009[c] + (5) cpd00067[c] + (1) cpd15413[c] --> (5) cpd00089[c] + (1) cpd00001[c]	0,10000	Starch and sucrose metabolism
rxn00553	UDPglucose:D-fructose-6-phosphate 2-alpha-D-glucosyltransferase	2.4.1.14	sll0045	(1) UDP-glucose[c] + (1) D-fructose-6-phosphate[c] --> (1) UDP[c] + (1) 6-Phosphosucrose[c]	(1) cpd00026[c] + (1) cpd00072[c] --> (1) cpd00014[c] + (1) cpd01693[c]	0,10000	Starch and sucrose metabolism
rxn08605	1,4-alpha-glucan branching enzyme (glycogen -> bglycogen)	2.4.1.18	sll0158	(1) Glycogen[c] --> (1) branching glycogen[c]	(1) cpd00155[c] --> (1) cpd15413[c]	0,10000	Starch and sucrose metabolism
rxn13710	1,4-alpha-glucan branching enzyme	2.4.1.18	sll0158	(4) ATP[c] + (5) D-Glucose[c] --> (4) ADP[c] + (4) H+[c] + (4) Phosphate[c] + (1) Glycogen[c]	(4) cpd00002[c] + (5) cpd00027[c] --> (4) cpd00008[c] + (4) cpd00067[c] + (4) cpd00009[c] + (1) cpd00155[c]	0,10000	Starch and sucrose metabolism
rxn08935	Maltodextrin glucosidase (maltohexaose)	Undetermined	sll0842	(1) H2O[c] + (1) Maltohexaose[c] --> (1) D-Glucose[c] + (1) Maltopentaose[c]	(1) cpd00001[c] + (1) cpd01329[c] --> (1) cpd00027[c] + (1) cpd15495[c]	0,10000	Starch and sucrose metabolism
rxn01967	beta-D-Glucose 1-phosphate 1,6-phosphomutase	5.4.2.6	sll1138	(1) beta-D-Glucose 1-phosphate[c] --> (1) beta-D-Glucose 6-phosphate[c]	(1) cpd00501[c] --> (1) cpd00863[c]	0,10000	Starch and sucrose metabolism
rxn12303	alpha,alpha-trehalose-phosphate synthase (udp-forming)	Undetermined	sll1566	(1) UDP-glucose[c] + (1) beta-D-Glucose 6-phosphate[c] --> (1) UDP[c] + (1) Trehalose 6-phosphate[c]	(1) cpd00026[c] + (1) cpd00863[c] --> (1) cpd00014[c] + (1) cpd00523[c]	0,10000	Starch and sucrose metabolism
rxn00022	alpha-D-Glucoside glucohydrolase	3.2.1.20	sll1676	(1) H2O[c] + (1) Maltose[c] --> (2) D-Glucose[c]	(1) cpd00001[c] + (1) cpd00179[c] --> (2) cpd00027[c]	0,10000	Starch and sucrose metabolism
rxn00212	UDPglucose pyrophosphohydrolase	3.6.1.45	slr0306	(1) H2O[c] + (1) UDP-glucose[c] --> (1) D-Glucose 1-phosphate[c] + (1) UMP[c]	(1) cpd00001[c] + (1) cpd00026[c] --> (1) cpd00089[c] + (1) cpd00091[c]	0,10000	Starch and sucrose metabolism
rxn00578	Sucrose-6-phosphate phosphohydrolase	3.1.3.24	slr0953	(1) H2O[c] + (1) 6-Phosphosucrose[c] --> (1) Phosphate[c] + (1) H+[c] + (1) Sucrose[c]	(1) cpd00001[c] + (1) cpd01693[c] --> (1) cpd00009[c] + (1) cpd00067[c] + (1) cpd00076[c]	0,10000	Starch and sucrose metabolism
rxn00695	ATP:alpha-D-glucose-1-phosphate adenyltransferase	2.7.7.27	slr1176	(1) ATP[c] + (1) D-Glucose 1-phosphate[c] --> (1) PPi[c] + (1) ADP-glucose[c]	(1) cpd00002[c] + (1) cpd00089[c] --> (1) cpd00012[c] + (1) cpd00387[c]	0,10000	Starch and sucrose metabolism
rxn04020	trehalose 6-phosphate:phosphate b-D-glucosyltransferase	2.4.1.216	slr1841	(1) Phosphate[c] + (1) H+[c] + (1) Trehalose 6-phosphate[c] --> (1) D-glucose-6-phosphate[c] + (1) beta-D-Glucose 1-phosphate[c]	(1) cpd00009[c] + (1) cpd00067[c] + (1) cpd00523[c] --> (1) cpd00079[c] + (1) cpd00501[c]	0,10000	Starch and sucrose metabolism
rxn00808	galactokinase	2.7.1.6		(1) ATP[c] + (1) Galactose[c] --> (1) ADP[c] + (1) D-Galactose 1-phosphate[c]	(1) cpd00002[c] + (1) cpd00108[c] --> (1) cpd00008[c] + (1) cpd00348[c]	0,10000	Starch and sucrose metabolism
rxn09399	1,4-alpha-glucan branching enzyme	2.4.1.18	sll0158	(1) Amylose[c] <=> (1) Glycogen[c]	(1) cpd11735[c] <=> (1) cpd00155[c]	-10000,10000	Starch and sucrose metabolism
rxn08126	Amylomaltase (maltotriose)	2.4.1.25	sll1676	(1) Maltose[c] + (1) Amylotriose[c] <=> (1) D-Glucose[c] + (1) Maltotetraose[c]	(1) cpd00179[c] + (1) cpd01262[c] <=> (1) cpd00027[c] + (1) cpd01399[c]	-10000,10000	Starch and sucrose metabolism
rxn08127	Amylomaltase (maltotetraose)	2.4.1.25	sll1676	(1) Maltose[c] + (1) Maltotetraose[c] <=> (1) D-Glucose[c] + (1) Maltopentaose[c]	(1) cpd00179[c] + (1) cpd01399[c] <=> (1) cpd00027[c] + (1) cpd15495[c]	-10000,10000	Starch and sucrose metabolism
rxn08128	Amylomaltase (maltopentaose)	2.4.1.25	sll1676	(1) Maltose[c] + (1) Maltopentaose[c] <=> (1) D-Glucose[c] + (1) Maltohexaose[c]	(1) cpd00179[c] + (1) cpd15495[c] <=> (1) cpd00027[c] + (1) cpd01329[c]	-10000,10000	Starch and sucrose metabolism
rxn08129	Amylomaltase (maltohexaose)	2.4.1.25	sll1676	(1) Maltose[c] + (1) Maltohexaose[c] <=> (1) D-Glucose[c] + (1) Maltoheptaose[c]	(1) cpd00179[c] + (1) cpd01329[c] <=> (1) cpd00027[c] + (1) cpd15494[c]	-10000,10000	Starch and sucrose metabolism
rxn00213	UTP-glucose-1-phosphate uridylyltransferase	2.7.7.9		(1) UTP[c] + (1) D-Glucose 1-phosphate[c] <=> (1) PPi[c] + (1) UDP-glucose[c]	(1) cpd00062[c] + (1) cpd00089[c] <=> (1) cpd00012[c] + (1) cpd00026[c]	-10000,10000	Starch and sucrose metabolism
rxn00048	6,7-Dimethyl-8-(1-D-ribityl)lumazine:6,7-dimethyl-8-(1-D-ribityl)	2.5.1.9	sll0300	(2) 6-7-Dimethyl-8--1-D-ribityllumazine[c] --> (1) Riboflavin[c] + (1) 4--1-D-Ribitylamino-5-aminouracil[c]	(2) cpd02656[c] --> (1) cpd00220[c] + (1) cpd02882[c]	0,10000	Riboflavin metabolism
rxn00391	Riboflavin-5-phosphate phosphohydrolase (acid optimum)	3.1.3.2	sll1108	(1) H2O[c] + (1) FMN[c] --> (1) Phosphate[c] + (1) H+[c] + (1) Riboflavin[c]	(1) cpd00001[c] + (1) cpd00050[c] --> (1) cpd00009[c] + (1) cpd00067[c] + (1) cpd00220[c]	0,10000	Riboflavin metabolism
rxn03080	6,7-Dimethyl-8-(1-D-ribityl)lumazine:6,7-dimethyl-8-(1-D-ribityl)	2.5.1.-	sll1282	(1) 4--1-D-Ribitylamino-5-aminouracil[c] + (1) 3-4-dihydroxy-2-butanone4-phosphate[c] --> (2) H2O[c] + (1) Phosphate[c] + (1) H+[c] + (1) 6-7-Dimethyl-8--1-D-ribityllumazine[c]	(1) cpd02882[c] + (1) cpd11225[c] --> (2) cpd00001[c] + (1) cpd00009[c] + (1) cpd00067[c] + (1) cpd02656[c]	0,10000	Riboflavin metabolism
rxn00300	GTP 7,8-8,9-dihydrolase (pyrophosphate-forming)	3.5.4.25	sll1894	(3) H2O[c] + (1) GTP[c] --> (1) PPi[c] + (1) Formate[c] + (1) H+[c] + (1) 2,5-Diamino-6-(5'-phosphoribosylamino)-4-pyrimidineone[c]	(3) cpd00001[c] + (1) cpd00038[c] --> (1) cpd00012[c] + (1) cpd00047[c] + (1) cpd00067[c] + (1) cpd00957[c]	0,10000	Riboflavin metabolism
rxn05040	3,4-Dihydroxy-2-butanone 4-phosphate synthase	4.1.99.12	sll1894	(1) D-Ribulose5-phosphate[c] --> (1) Formate[c] + (1) H+[c] + (1) 3-4-dihydroxy-2-butanone4-phosphate[c]	(1) cpd00171[c] --> (1) cpd00047[c] + (1) cpd00067[c] + (1) cpd11225[c]	0,10000	Riboflavin metabolism
rxn02474	5-amino-6-(5-phosphoribitylamino)uracil:NADP+ 1'-oxidoreductase	1.1.1.193	slr0066	(1) NADPH[c] + (1) H+[c] + (1) 5-Amino-6--5-phosphoribosylaminouracil[c] --> (1) NADP[c] + (1) 5-Amino-6--5-phosphoribitylaminouracil[c]	(1) cpd00005[c] + (1) cpd00067[c] + (1) cpd00931[c] --> (1) cpd00006[c] + (1) cpd02720[c]	0,10000	Riboflavin metabolism
rxn02475	2,5-Diamino-6-hydroxy-4-(5-phosphoribosylamino)-pyrimidine	3.5.4.26	slr0066	(1) H2O[c] + (1) H+[c] + (1) 2,5-Diamino-6-(5'-phosphoribosylamino)-4-pyrimidineone[c] --> (1) NH3[c] + (1) 5-Amino-6--5-phosphoribosylaminouracil[c]	(1) cpd00001[c] + (1) cpd00067[c] + (1) cpd00957[c] --> (1) cpd00013[c] + (1) cpd00931[c]	0,10000	Riboflavin metabolism
rxn00122	ATP:FMN adenylyltransferase	2.7.7.2	slr1882	(1) ATP[c] + (1) FMN[c] --> (1) PPi[c] + (1) FAD[c]	(1) cpd00002[c] + (1) cpd00050[c] --> (1) cpd00012[c] + (1) cpd00015[c]	0,10000	Riboflavin metabolism
rxn00392	ATP:riboflavin 5'-phosphotransferase	2.7.1.26	slr1882	(1) ATP[c] + (1) Riboflavin[c] --> (1) ADP[c] + (1) FMN[c]	(1) cpd00002[c] + (1) cpd00220[c] --> (1) cpd00008[c] + (1) cpd00050[c]	0,10000	Riboflavin metabolism
rxn05039	pyrimidine phosphatase	3.1.3.-		(1) H2O[c] + (1) 5-Amino-6--5-phosphoribitylaminouracil[c] --> (1) Phosphate[c] + (1) 4--1-D-Ribitylamino-5-aminouracil[c] + (1) H+[c]	(1) cpd00001[c] + (1) cpd02720[c] --> (1) cpd00009[c] + (1) cpd02882[c] + (1) cpd00067[c]	0,10000	Riboflavin metabolism
rxn00278	L-Alanine:NAD+ oxidoreductase (deaminating)	1.4.1.1	sll1682	(1) NADH[c] + (1) NH3[c] + (1) Pyruvate[c] + (1) H+[c] --> (1) H2O[c] + (1) NAD[c] + (1) L-Alanine[c]	(1) cpd00004[c] + (1) cpd00013[c] + (1) cpd00020[c] + (1) cpd00067[c] --> (1) cpd00001[c] + (1) cpd00003[c] + (1) cpd00035[c]	0,10000	Reductive carboxylate cycle (CO2 fixation), Taurine and hypotaurine metabolism
rxn00175	Acetate:CoA ligase (AMP-forming)	6.2.1.1	sll0542	(1) ATP[c] + (1) CoA[c] + (1) Acetate[c] + (1) H+[c] --> (1) PPi[c] + (1) AMP[c] + (1) Acetyl-CoA[c]	(1) cpd00002[c] + (1) cpd00010[c] + (1) cpd00029[c] + (1) cpd00067[c] --> (1) cpd00012[c] + (1) cpd00018[c] + (1) cpd00022[c]	0,10000	Reductive carboxylate cycle (CO2 fixation), Glycolysis / Gluconeogenesis
rxn09753	fumarate reductase, cytosolic/mitochondrial	1.3.99.1	sll0823 and sll1625 and slr1233	(1) Fumarate[c] + (1) FADH2[c] --> (1) FAD[c] + (1) Succinate[c]	(1) cpd00106[c] + (1) cpd00982[c] --> (1) cpd00015[c] + (1) cpd00036[c]	0,10000	Reductive carboxylate cycle (CO2 fixation)
rxn09180	protoporphyrinogen oxidase (anaerobic)	1.3.3.4	slr1790	(3) Fumarate[c] + (1) ProtoporphyrinogenIX[c] <=> (3) Succinate[c] + (1) Protoporphyrin[c]	(3) cpd00106[c] + (1) cpd00791[c] <=> (3) cpd00036[c] + (1) cpd01476[c]	-10000,10000	Reductive carboxylate cycle (CO2 fixation)
rxn00902	3-Carboxy-3-hydroxy-4-methylpentanoate 3-methyl-2-oxobutanoate-lyase	4.1.3.12	(sll1564) or (slr0186)	(1) H2O[c] + (1) Acetyl-CoA[c] + (1) 3-Methyl-2-oxobutanoate[c] --> (1) CoA[c] + (1) H+[c] + (1) 2-Isopropylmalate[c]	(1) cpd00001[c] + (1) cpd00022[c] + (1) cpd00123[c] --> (1) cpd00010[c] + (1) cpd00067[c] + (1) cpd01646[c]	0,10000	Pyruvate metabolism, Valine,leucine and isoleucine biosynthesis
rxn00225	ATP:acetate phosphotransferase	6.2.1.1	sll1299	(1) ATP[c] + (1) Acetate[c] + (1) H+[c] <=> (1) ADP[c] + (1) Acetylphosphate[c]	(1) cpd00002[c] + (1) cpd00029[c] + (1) cpd00067[c] <=> (1) cpd00008[c] + (1) cpd00196[c]	-10000,10000	Pyruvate metabolism, Taurine and hypotaurine metabolism
rxn00173	Acetyl-CoA:orthophosphate acetyltransferase	2.3.1.8	slr2132	(1) Phosphate[c] + (1) Acetyl-CoA[c] + (1) H+[c] <=> (1) CoA[c] + (1) Acetylphosphate[c]	(1) cpd00009[c] + (1) cpd00022[c] + (1) cpd00067[c] <=> (1) cpd00010[c] + (1) cpd00196[c]	-10000,10000	Pyruvate metabolism, Taurine and hypotaurine metabolism
rxn00147	ATP:pyruvate,water phosphotransferase	2.7.9.2	slr0301	(1) H2O[c] + (1) ATP[c] + (1) Pyruvate[c] --> (1) Phosphate[c] + (1) AMP[c] + (1) Phosphoenolpyruvate[c] + (1) H+[c]	(1) cpd00001[c] + (1) cpd00002[c] + (1) cpd00020[c] --> (1) cpd00009[c] + (1) cpd00018[c] + (1) cpd00061[c] + (1) cpd00067[c]	0,10000	Pyruvate metabolism, Reductive carboxylate cycle (CO2 fixation)
rxn00304	GTP:pyruvate O2-phosphotransferase	2.7.1.40	(sll0587 or sll1275)	(1) GDP[c] + (1) Phosphoenolpyruvate[c] --> (1) Pyruvate[c] + (1) GTP[c]	(1) cpd00031[c] + (1) cpd00061[c] --> (1) cpd00020[c] + (1) cpd00038[c]	0,10000	Pyruvate metabolism, Purine metabolism
rxn00411	CTP:pyruvate O2-phosphotransferase	2.7.1.40	(sll0587 or sll1275)	(1) Phosphoenolpyruvate[c] + (1) CDP[c] --> (1) Pyruvate[c] + (1) CTP[c]	(1) cpd00061[c] + (1) cpd00096[c] --> (1) cpd00020[c] + (1) cpd00052[c]	0,10000	Pyruvate metabolism, Purine metabolism
rxn00460	UTP:pyruvate O2-phosphotransferase	2.7.1.40	(sll0587 or sll1275)	(1) UDP[c] + (1) Phosphoenolpyruvate[c] --> (1) Pyruvate[c] + (1) UTP[c]	(1) cpd00014[c] + (1) cpd00061[c] --> (1) cpd00020[c] + (1) cpd00062[c]	0,10000	Pyruvate metabolism, Purine metabolism
rxn00506	Acetaldehyde:NAD+ oxidoreductase	1.2.1.3	slr0091	(1) H2O[c] + (1) NAD[c] + (1) Acetaldehyde[c] <=> (1) NADH[c] + (1) Acetate[c] + (2) H+[c]	(1) cpd00001[c] + (1) cpd00003[c] + (1) cpd00071[c] <=> (1) cpd00004[c] + (1) cpd00029[c] + (2) cpd00067[c]	-10000,10000	Pyruvate metabolism, Glycolysis / Gluconeogenesis
rxn00011	pyruvate:thiamin diphosphate acetaldehydetransferase	1.2.4.1 or 2.2.1.6	((sll1721 and slr1934) or (sll0065))	(1) Pyruvate[c] + (1) TPP[c] + (1) H+[c] --> (1) CO2[c] + (1) 2-Hydroxyethyl-ThPP[c]	(1) cpd00020[c] + (1) cpd00056[c] + (1) cpd00067[c] --> (1) cpd00011[c] + (1) cpd03049[c]	0,10000	Pyruvate Metabolism
rxn01274	S-(2-Hydroxyacyl)glutathione hydrolase	3.1.2.6	(sll1019) or (slr1259)	(1) H2O[c] + (1) (R)-S-Lactoylglutathione[c] --> (1) Glutathione[c] + (1) H+[c] + (1) D-Lactate[c]	(1) cpd00001[c] + (1) cpd02182[c] --> (1) cpd00042[c] + (1) cpd00067[c] + (1) cpd00221[c]	0,10000	Pyruvate metabolism
rxn00748	Glycerone-phosphate phospho-lyase	4.2.3.3	sll0036	(1) Glycerone-phosphate[c] --> (1) Phosphate[c] + (1) H+[c] + (1) 2-Oxopropanal[c]	(1) cpd00095[c] --> (1) cpd00009[c] + (1) cpd00067[c] + (1) cpd00428[c]	0,10000	Pyruvate metabolism
rxn05938	Pyruvate-ferredoxin oxidoreductase	1.2.7.1	sll0741	(1) CoA[c] + (1) Pyruvate[c] + (2) Oxidized ferredoxin[c] --> (1) H+[c] + (1) CO2[c] + (1) Acetyl-CoA[c] + (2) Reduced ferredoxin[c]	(1) cpd00010[c] + (1) cpd00020[c] + (2) cpfdxo22[c] --> (1) cpd00067[c] + (1) cpd00011[c] + (1) cpd00022[c] + (2) cpfdxr22[c]	0,10000	Pyruvate metabolism
rxn00159	(S)-Malate:NADP+ oxidoreductase(oxaloacetate-decarboxylating)	1.1.1.38	slr0721	(1) NAD[c] + (1) L-Malate[c] --> (1) NADH[c] + (1) CO2[c] + (1) Pyruvate[c]	(1) cpd00003[c] + (1) cpd00130[c] --> (1) cpd00004[c] + (1) cpd00011[c] + (1) cpd00020[c]	0,10000	Pyruvate metabolism
rxn00161	(S)-Malate:NADP+ oxidoreductase(oxaloacetate-decarboxylating)	1.1.1.38	slr0721	(1) NADP[c] + (1) L-Malate[c] --> (1) NADPH[c] + (1) CO2[c] + (1) Pyruvate[c]	(1) cpd00006[c] + (1) cpd00130[c] --> (1) cpd00005[c] + (1) cpd00011[c] + (1) cpd00020[c]	0,10000	Pyruvate Metabolism
rxn02342	2-(alpha-Hydroxyethyl)thiamine diphosphate:lipoamide	1.2.4.1	sll1721 and slr1934	(1) Lipoamide[c] + (1) 2-Hydroxyethyl-ThPP[c] <=> (1) TPP[c] + (1) S-Acetyldihydrolipoamide[c]	(1) cpd00213[c] + (1) cpd03049[c] <=> (1) cpd00056[c] + (1) cpd00836[c]	-10000,10000	Pyruvate Metabolism
rxn01615	Propane-1,2-diol:NAD+ oxidoreductase	1.1.1.77	slr0091	(1) NAD[c] + (1) 1,2-Propanediol[c] <=> (1) NADH[c] + (1) H+[c] + (1) L-Lactaldehyde[c]	(1) cpd00003[c] + (1) cpd00453[c] <=> (1) cpd00004[c] + (1) cpd00067[c] + (1) cpd00334[c]	-10000,10000	Pyruvate metabolism
rxn01834	(R)-S-Lactoylglutathione methylglyoxal-lyase (isomerizing)	4.4.1.5	slr0381	(1) (R)-S-Lactoylglutathione[c] <=> (1) Glutathione[c] + (1) 2-Oxopropanal[c]	(1) cpd02182[c] <=> (1) cpd00042[c] + (1) cpd00428[c]	-10000,10000	Pyruvate metabolism
rxn00500	(R)-Lactate:NAD+ oxidoreductase	1.1.1.28	slr1556	(1) NAD[c] + (1) D-Lactate[c] <=> (1) NADH[c] + (1) Pyruvate[c] + (1) H+[c]	(1) cpd00003[c] + (1) cpd00221[c] <=> (1) cpd00004[c] + (1) cpd00020[c] + (1) cpd00067[c]	-10000,10000	Pyruvate metabolism
rxn01018	Carbamoyl-phosphate:L-aspartate carbamoyltransferase	2.1.3.2	slr1476	(1) L-Aspartate[c] + (1) Carbamoylphosphate[c] --> (1) Phosphate[c] + (2) H+[c] + (1) N-Carbamoyl-L-aspartate[c]	(1) cpd00041[c] + (1) cpd00146[c] --> (1) cpd00009[c] + (2) cpd00067[c] + (1) cpd00343[c]	0,10000	Pyrimidine metabolism, Alanine and aspartate metabolism
rxn00711	UMP:pyrophosphate phosphoribosyltransferase	2.4.2.9	(sll1035 or sll0368)	(1) PPi[c] + (1) UMP[c] --> (1) Uracil[c] + (1) PRPP[c]	(1) cpd00012[c] + (1) cpd00091[c] --> (1) cpd00092[c] + (1) cpd00103[c]	0,10000	Pyrimidine metabolism
rxn00363	Cytidine-5'-monophosphate phosphohydrolase	3.1.3.5	(sll1108 or sll1459)	(1) H2O[c] + (1) CMP[c] --> (1) Phosphate[c] + (1) H+[c] + (1) Cytidine[c]	(1) cpd00001[c] + (1) cpd00046[c] --> (1) cpd00009[c] + (1) cpd00067[c] + (1) cpd00367[c]	0,10000	Pyrimidine metabolism
rxn06075	2'-Deoxyuridine 5'-diphosphate:oxidized-thioredoxin	1.17.4.1	(slr1164 and slr0591)	(1) UDP[c] + (1) Reduced thioredoxin[c] --> (1) H2O[c] + (1) dUDP[c] + (1) Oxidized thioredoxin[c]	(1) cpd00014[c] + (1) cpd11421[c] --> (1) cpd00001[c] + (1) cpd00978[c] + (1) cpd11420[c]	0,10000	Pyrimidine metabolism
rxn06076	2'-Deoxycytidine diphosphate:oxidized-thioredoxin 2'-oxidoreductase	1.17.4.1	(slr1164 and slr0591)	(1) CDP[c] + (1) Reduced thioredoxin[c] --> (1) H2O[c] + (1) dCDP[c] + (1) Oxidized thioredoxin[c]	(1) cpd00096[c] + (1) cpd11421[c] --> (1) cpd00001[c] + (1) cpd00533[c] + (1) cpd11420[c]	0,10000	Pyrimidine metabolism
rxn00710	Orotidine-5'-phosphate carboxy-lyase	4.1.1.23	sll0838	(1) H+[c] + (1) Orotidylic acid[c] --> (1) CO2[c] + (1) UMP[c]	(1) cpd00067[c] + (1) cpd00810[c] --> (1) cpd00011[c] + (1) cpd00091[c]	0,10000	Pyrimidine metabolism
rxn00367	CTP pyrophosphohydrolase	3.6.1.19	sll1005	(1) H2O[c] + (1) CTP[c] --> (1) PPi[c] + (1) CMP[c]	(1) cpd00001[c] + (1) cpd00052[c] --> (1) cpd00012[c] + (1) cpd00046[c]	0,10000	Pyrimidine metabolism
rxn00463	Uridine triphosphate pyrophosphohydrolase	3.6.1.19	sll1005	(1) H2O[c] + (1) UTP[c] --> (1) PPi[c] + (1) UMP[c]	(1) cpd00001[c] + (1) cpd00062[c] --> (1) cpd00012[c] + (1) cpd00091[c]	0,10000	Pyrimidine metabolism
rxn01519	dUTP nucleotidohydrolase	3.6.1.19	sll1005	(1) H2O[c] + (1) dUTP[c] --> (1) PPi[c] + (1) dUMP[c]	(1) cpd00001[c] + (1) cpd00358[c] --> (1) cpd00012[c] + (1) cpd00299[c]	0,10000	Pyrimidine metabolism
rxn01145	Thymidylate 5'-phosphohydrolase	3.1.3.5	sll1108 or sll1459	(1) H2O[c] + (1) dTMP[c] --> (1) Phosphate[c] + (1) H+[c] + (1) Thymidine[c]	(1) cpd00001[c] + (1) cpd00298[c] --> (1) cpd00009[c] + (1) cpd00067[c] + (1) cpd00184[c]	0,10000	Pyrimidine metabolism
rxn00407	CTP aminohydrolase	3.5.4.13	sll1258	(1) H2O[c] + (1) CTP[c] + (1) H+[c] --> (1) NH3[c] + (1) UTP[c]	(1) cpd00001[c] + (1) cpd00052[c] + (1) cpd00067[c] --> (1) cpd00013[c] + (1) cpd00062[c]	0,10000	Pyrimidine metabolism
rxn01672	dCTP aminohydrolase	3.5.4.13	sll1258	(1) H2O[c] + (1) H+[c] + (1) dCTP[c] --> (1) NH3[c] + (1) dUTP[c]	(1) cpd00001[c] + (1) cpd00067[c] + (1) cpd00356[c] --> (1) cpd00013[c] + (1) cpd00358[c]	0,10000	Pyrimidine metabolism
rxn00410	UTP:ammonia ligase(ADP-forming)	6.3.4.2	sll1443	(1) ATP[c] + (1) NH3[c] + (1) UTP[c] --> (1) ADP[c] + (1) Phosphate[c] + (1) CTP[c] + (2) H+[c]	(1) cpd00002[c] + (1) cpd00013[c] + (1) cpd00062[c] --> (1) cpd00008[c] + (1) cpd00009[c] + (1) cpd00052[c] + (2) cpd00067[c]	0,10000	Pyrimidine metabolism
rxn00412	UTP:ammonia ligase(ADP-forming)	6.3.4.2	sll1443	(1) H2O[c] + (1) ATP[c] + (1) L-Glutamine[c] + (1) UTP[c] --> (1) ADP[c] + (1) Phosphate[c] + (1) L-Glutamate[c] + (1) CTP[c] + (2) H+[c]	(1) cpd00001[c] + (1) cpd00002[c] + (1) cpd00053[c] + (1) cpd00062[c] --> (1) cpd00008[c] + (1) cpd00009[c] + (1) cpd00023[c] + (1) cpd00052[c] + (2) cpd00067[c]	0,10000	Pyrimidine metabolism
rxn01143	ATP:thymidine 5'-phosphotransferase	2.7.1.21	slr0379	(1) ATP[c] + (1) Thymidine[c] --> (1) ADP[c] + (1) dTMP[c]	(1) cpd00002[c] + (1) cpd00184[c] --> (1) cpd00008[c] + (1) cpd00298[c]	0,10000	Pyrimidine metabolism
rxn00408	CTP phosphohydrolase	3.6.1.15	slr0402	(1) H2O[c] + (1) CTP[c] --> (1) Phosphate[c] + (1) H+[c] + (1) CDP[c]	(1) cpd00001[c] + (1) cpd00052[c] --> (1) cpd00009[c] + (1) cpd00067[c] + (1) cpd00096[c]	0,10000	Pyrimidine metabolism
rxn05289	TRDR	1.8.1.9	slr0600	(1) NADPH[c] + (1) H+[c] + (1) Oxidized thioredoxin[c] --> (1) NADP[c] + (1) Reduced thioredoxin[c]	(1) cpd00005[c] + (1) cpd00067[c] + (1) cpd11420[c] --> (1) cpd00006[c] + (1) cpd11421[c]	0,10000	Pyrimidine metabolism
rxn00717	Cytosine aminohydrolase	3.5.4.1	slr1237	(1) H2O[c] + (1) H+[c] + (1) Cytosine[c] --> (1) NH3[c] + (1) Uracil[c]	(1) cpd00001[c] + (1) cpd00067[c] + (1) cpd00307[c] --> (1) cpd00013[c] + (1) cpd00092[c]	0,10000	Pyrimidine metabolism
rxn01465	(S)-Dihydroorotate amidohydrolase	3.5.2.3	(sll1018) or (slr0406)	(1) H2O[c] + (1) S-Dihydroorotate[c] <=> (1) H+[c] + (1) N-Carbamoyl-L-aspartate[c]	(1) cpd00001[c] + (1) cpd00282[c] <=> (1) cpd00067[c] + (1) cpd00343[c]	-10000,10000	Pyrimidine metabolism
rxn01360	(S)-Dihydroorotate:oxygen oxidoreductase	1.3.3.1	sll0744 or slr1418	(1) O2[c] + (1) S-Dihydroorotate[c] <=> (1) H2O2[c] + (1) Orotate[c]	(1) cpd00007[c] + (1) cpd00282[c] <=> (1) cpd00025[c] + (1) cpd00247[c]	-10000,10000	Pyrimidine metabolism
rxn00119	ATP:nucleoside-phosphate phosphotransferase	2.7.4.14	sll1249	(1) ATP[c] + (1) UMP[c] <=> (1) ADP[c] + (1) UDP[c]	(1) cpd00002[c] + (1) cpd00091[c] <=> (1) cpd00008[c] + (1) cpd00014[c]	-10000,10000	Pyrimidine metabolism
rxn00364	ATP:CMP phosphotransferase	2.7.4.14	sll1249	(1) ATP[c] + (1) CMP[c] <=> (1) ADP[c] + (1) CDP[c]	(1) cpd00002[c] + (1) cpd00046[c] <=> (1) cpd00008[c] + (1) cpd00096[c]	-10000,10000	Pyrimidine metabolism
rxn04464	5,10-methylenetetrahydrofolate,FADH2:dUMP C-methyltransferase	2.1.1.148	sll1635	(1) 5-10-Methylenetetrahydrofolate[c] + (1) dUMP[c] + (1) FADH2[c] <=> (1) FAD[c] + (1) Tetrahydrofolate[c] + (1) dTMP[c]	(1) cpd00125[c] + (1) cpd00299[c] + (1) cpd00982[c] <=> (1) cpd00015[c] + (1) cpd00087[c] + (1) cpd00298[c]	-10000,10000	Pyrimidine metabolism
rxn00117	ATP:nucleoside-diphosphate phosphatransferase	2.7.4.6	sll1852	(1) ATP[c] + (1) UDP[c] <=> (1) ADP[c] + (1) UTP[c]	(1) cpd00002[c] + (1) cpd00014[c] <=> (1) cpd00008[c] + (1) cpd00062[c]	-10000,10000	Pyrimidine metabolism
rxn00409	ATP:nucleoside-diphosphate phosphatransferase	2.7.4.6	sll1852	(1) ATP[c] + (1) CDP[c] <=> (1) ADP[c] + (1) CTP[c]	(1) cpd00002[c] + (1) cpd00096[c] <=> (1) cpd00008[c] + (1) cpd00052[c]	-10000,10000	Pyrimidine metabolism
rxn01512	ATP:nucleoside-diphosphate phosphatransferase	2.7.4.6	sll1852	(1) ATP[c] + (1) dTDP[c] <=> (1) ADP[c] + (1) TTP[c]	(1) cpd00002[c] + (1) cpd00297[c] <=> (1) cpd00008[c] + (1) cpd00357[c]	-10000,10000	Pyrimidine metabolism
rxn01673	ATP:nucleoside-diphosphate phosphatransferase	2.7.4.6	sll1852	(1) ATP[c] + (1) dCDP[c] <=> (1) ADP[c] + (1) dCTP[c]	(1) cpd00002[c] + (1) cpd00533[c] <=> (1) cpd00008[c] + (1) cpd00356[c]	-10000,10000	Pyrimidine metabolism
rxn01678	ATP:nucleoside-diphosphate phosphatransferase	2.7.4.6	sll1852	(1) ATP[c] + (1) dUDP[c] <=> (1) ADP[c] + (1) dUTP[c]	(1) cpd00002[c] + (1) cpd00978[c] <=> (1) cpd00008[c] + (1) cpd00358[c]	-10000,10000	Pyrimidine metabolism
rxn01362	Orotidine-5'-phosphate:pyrophosphate phosphoribosyltransferase	2.4.2.10	slr0185	(1) PPi[c] + (1) Orotidylic acid[c] <=> (1) PRPP[c] + (1) Orotate[c]	(1) cpd00012[c] + (1) cpd00810[c] <=> (1) cpd00103[c] + (1) cpd00247[c]	-10000,10000	Pyrimidine metabolism
rxn01513	ATP:dTMP phosphotransferase	2.7.4.9	slr0379	(1) ATP[c] + (1) dTMP[c] <=> (1) ADP[c] + (1) dTDP[c]	(1) cpd00002[c] + (1) cpd00298[c] <=> (1) cpd00008[c] + (1) cpd00297[c]	-10000,10000	Pyrimidine metabolism
rxn01517	ATP:dTMP phosphotransferase		slr0379	(1) ATP[c] + (1) dUMP[c] <=> (1) ADP[c] + (1) dUDP[c]	(1) cpd00002[c] + (1) cpd00299[c] <=> (1) cpd00008[c] + (1) cpd00978[c]	-10000,10000	Pyrimidine metabolism
rxn01518	ATP:deoxyuridine 5'-phosphotransferase	2.7.1.21	slr0379	(1) ATP[c] + (1) Deoxyuridine[c] <=> (1) ADP[c] + (1) dUMP[c]	(1) cpd00002[c] + (1) cpd00412[c] <=> (1) cpd00008[c] + (1) cpd00299[c]	-10000,10000	Pyrimidine metabolism
rxn01648	Cytidine:orthophosphate alpha-D-ribosyltransferase	2.4.2.2	slr1397	(1) Phosphate[c] + (1) H+[c] + (1) Cytidine[c] <=> (1) Cytosine[c] + (1) Ribose 1-phosphate[c]	(1) cpd00009[c] + (1) cpd00067[c] + (1) cpd00367[c] <=> (1) cpd00307[c] + (1) cpd00475[c]	-10000,10000	Pyrimidine metabolism
rxn03004	10-Formyltetrahydrofolate:5'-phosphoribosylglycinamide	2.1.2.2	(slr0477) or (slr0861)	(1) 10-Formyltetrahydrofolate[c] + (1) GAR[c] <=> (1) H+[c] + (1) Tetrahydrofolate[c] + (1) N-Formyl-GAR[c]	(1) cpd00201[c] + (1) cpd02394[c] <=> (1) cpd00067[c] + (1) cpd00087[c] + (1) cpd02678[c]	-10000,10000	Purine metabolism, One carbon pool by folate
rxn03137	10-Formyltetrahydrofolate:5'-phosphoribosyl-5-amino-4-	2.1.2.3	slr0597	(1) 10-Formyltetrahydrofolate[c] + (1) AICAR[c] <=> (1) Tetrahydrofolate[c] + (1) FAICAR[c]	(1) cpd00201[c] + (1) cpd02851[c] <=> (1) cpd00087[c] + (1) cpd02884[c]	-10000,10000	Purine metabolism, One carbon pool by folate
rxn00838	IMP:L-aspartate ligase (GDP-forming)	6.3.4.4	sll1823	(1) GTP[c] + (1) L-Aspartate[c] + (1) IMP[c] --> (1) Phosphate[c] + (1) GDP[c] + (2) H+[c] + (1) Adenylosuccinate[c]	(1) cpd00038[c] + (1) cpd00041[c] + (1) cpd00114[c] --> (1) cpd00009[c] + (1) cpd00031[c] + (2) cpd00067[c] + (1) cpd02375[c]	0,10000	Purine metabolism, Alanine and aspartate metabolism
rxn00800	N6-(1,2-Dicarboxyethyl)AMP AMP-lyase	4.3.2.2	sll0421	(1) Adenylosuccinate[c] <=> (1) AMP[c] + (1) Fumarate[c]	(1) cpd02375[c] <=> (1) cpd00018[c] + (1) cpd00106[c]	-10000,10000	Purine metabolism, Alanine and aspartate metabolism
rxn00775	ADPribose ribophosphohydrolase	3.6.1.13	(sll1054 or slr1134)	(1) H2O[c] + (1) ADP-ribose[c] --> (1) AMP[c] + (1) ribose-5-phosphate[c]	(1) cpd00001[c] + (1) cpd00251[c] --> (1) cpd00018[c] + (1) cpd00101[c]	0,10000	Purine metabolism
rxn03084	5'-Phosphoribosylformylglycinamide:L-glutamine amido-ligase	6.3.5.3	(sll1056) or (slr0520)	(1) H2O[c] + (1) ATP[c] + (1) L-Glutamine[c] + (1) N-Formyl-GAR[c] --> (1) ADP[c] + (1) Phosphate[c] + (1) L-Glutamate[c] + (1) H+[c] + (1) 5'-Phosphoribosylformylglycinamidine[c]	(1) cpd00001[c] + (1) cpd00002[c] + (1) cpd00053[c] + (1) cpd02678[c] --> (1) cpd00008[c] + (1) cpd00009[c] + (1) cpd00023[c] + (1) cpd00067[c] + (1) cpd02826[c]	0,10000	Purine metabolism
rxn00132	Adenosine 5'-monophosphate phosphohydrolase	3.1.3.5	(sll1108 or sll1459)	(1) H2O[c] + (1) AMP[c] --> (1) Phosphate[c] + (1) H+[c] + (1) Adenosine[c]	(1) cpd00001[c] + (1) cpd00018[c] --> (1) cpd00009[c] + (1) cpd00067[c] + (1) cpd00182[c]	0,10000	Purine metabolism
rxn10060	NAD kinase (dTTP)	2.7.1.23	(sll1415 or slr0400)	(1) NAD[c] + (1) TTP[c] --> (1) NADP[c] + (1) dTDP[c]	(1) cpd00003[c] + (1) cpd00357[c] --> (1) cpd00006[c] + (1) cpd00297[c]	0,10000	Purine metabolism
rxn05231	Ribonucleotide reductase: ADP	1.17.4.1	(slr1164 and slr0591)	(1) ADP[c] + (1) Reduced thioredoxin[c] --> (1) H2O[c] + (1) dADP[c] + (1) Oxidized thioredoxin[c]	(1) cpd00008[c] + (1) cpd11421[c] --> (1) cpd00001[c] + (1) cpd00177[c] + (1) cpd11420[c]	0,10000	Purine metabolism
rxn05233	Ribonucleotide reductase: GDP	1.17.4.1	(slr1164 and slr0591)	(1) GDP[c] + (1) Reduced thioredoxin[c] --> (1) H2O[c] + (1) dGDP[c] + (1) Oxidized thioredoxin[c]	(1) cpd00031[c] + (1) cpd11421[c] --> (1) cpd00001[c] + (1) cpd00295[c] + (1) cpd11420[c]	0,10000	Purine metabolism
rxn00307	GTP pyrophosphate-lyase (cyclizing)	4.6.1.2	(slr1991 or sll0646)	(1) GTP[c] --> (1) PPi[c] + (1) cGMP[c]	(1) cpd00038[c] --> (1) cpd00012[c] + (1) cpd00697[c]	0,10000	Purine metabolism
rxn00130	AMP aminohydrolase	3.5.4.6	sll0063	(1) H2O[c] + (1) AMP[c] + (1) H+[c] --> (1) NH3[c] + (1) IMP[c]	(1) cpd00001[c] + (1) cpd00018[c] + (1) cpd00067[c] --> (1) cpd00013[c] + (1) cpd00114[c]	0,10000	Purine metabolism
rxn01352	dGTP triphosphohydrolase	3.1.5.1	sll0398	(1) H2O[c] + (1) dGTP[c] --> (1) H+[c] + (1) Deoxyguanosine[c] + (1) Triphosphate[c]	(1) cpd00001[c] + (1) cpd00241[c] --> (1) cpd00067[c] + (1) cpd00277[c] + (1) cpd00421[c]	0,10000	Purine metabolism
rxn01184	APS:ATP adenylyltransferase	2.7.7.53	sll0509	(1) Sulfate[c] + (1) H+[c] + (1) AppppA[c] --> (1) ATP[c] + (1) APS[c]	(1) cpd00048[c] + (1) cpd00067[c] + (1) cpd00924[c] --> (1) cpd00002[c] + (1) cpd00193[c]	0,10000	Purine metabolism
rxn00241	GTP phosphohydrolase (vesicle-releasing)	3.6.5.3	sll0830 and sll1098 and sll1099 and slr1463 and slr0402	(1) H2O[c] + (1) GTP[c] --> (1) Phosphate[c] + (1) GDP[c] + (1) H+[c]	(1) cpd00001[c] + (1) cpd00038[c] --> (1) cpd00009[c] + (1) cpd00031[c] + (1) cpd00067[c]	0,10000	Purine metabolism
rxn00301	Guanosine 5'-triphosphate pyrophosphohydrolase	3.6.1.19	sll1005	(1) H2O[c] + (1) GTP[c] --> (1) PPi[c] + (1) GMP[c]	(1) cpd00001[c] + (1) cpd00038[c] --> (1) cpd00012[c] + (1) cpd00126[c]	0,10000	Purine metabolism
rxn00514	Inosine 5'-triphosphate pyrophosphohydrolase	3.6.1.19	sll1005	(1) H2O[c] + (1) ITP[c] --> (1) PPi[c] + (1) IMP[c]	(1) cpd00001[c] + (1) cpd00068[c] --> (1) cpd00012[c] + (1) cpd00114[c]	0,10000	Purine metabolism
rxn01351	2'-Deoxyguanosine 5'-triphosphate pyrophosphohydrolase	3.6.1.19	sll1005	(1) H2O[c] + (1) dGTP[c] --> (1) PPi[c] + (1) dGMP[c]	(1) cpd00001[c] + (1) cpd00241[c] --> (1) cpd00012[c] + (1) cpd00296[c]	0,10000	Purine metabolism
rxn00913	Guanosine 5'-monophosphate phosphohydrolase	3.1.3.5	sll1108 or sll1459	(1) H2O[c] + (1) GMP[c] --> (1) Phosphate[c] + (1) H+[c] + (1) Guanosine[c]	(1) cpd00001[c] + (1) cpd00126[c] --> (1) cpd00009[c] + (1) cpd00067[c] + (1) cpd00311[c]	0,10000	Purine metabolism
rxn01445	2'-Deoxyguanosine 5'-monophosphate phosphohydrolase	3.1.3.5	sll1108 or sll1459	(1) H2O[c] + (1) dGMP[c] --> (1) Phosphate[c] + (1) H+[c] + (1) Deoxyguanosine[c]	(1) cpd00001[c] + (1) cpd00296[c] --> (1) cpd00009[c] + (1) cpd00067[c] + (1) cpd00277[c]	0,10000	Purine metabolism
rxn01521	5'-nucleotidase (dUMP)	3.1.3.5	sll1108 or sll1459	(1) H2O[c] + (1) dUMP[c] --> (1) Phosphate[c] + (1) H+[c] + (1) Deoxyuridine[c]	(1) cpd00001[c] + (1) cpd00299[c] --> (1) cpd00009[c] + (1) cpd00067[c] + (1) cpd00412[c]	0,10000	Purine metabolism
rxn00065	ATP pyrophosphate-lyase (cyclizing)	4.6.1.1	sll1161	(1) ATP[c] --> (1) PPi[c] + (1) cAMP[c]	(1) cpd00002[c] --> (1) cpd00012[c] + (1) cpd00446[c]	0,10000	Purine metabolism
rxn00139	AMP:pyrophosphate phosphoribosyltransferase	2.4.2.7	sll1430	(1) PRPP[c] + (1) Adenine[c] --> (1) PPi[c] + (1) AMP[c]	(1) cpd00103[c] + (1) cpd00128[c] --> (1) cpd00012[c] + (1) cpd00018[c]	0,10000	Purine metabolism
rxn00916	Xanthosine-5'-phosphate:ammonia ligase (AMP-forming)	6.3.4.1	slr0213	(1) ATP[c] + (1) NH3[c] + (1) XMP[c] --> (1) PPi[c] + (1) AMP[c] + (1) H+[c] + (1) GMP[c]	(1) cpd00002[c] + (1) cpd00013[c] + (1) cpd00497[c] --> (1) cpd00012[c] + (1) cpd00018[c] + (1) cpd00067[c] + (1) cpd00126[c]	0,10000	Purine metabolism
rxn00513	ITP diphosphohydrolase	3.6.1.15	slr0402	(1) H2O[c] + (1) ITP[c] --> (1) Phosphate[c] + (1) H+[c] + (1) IDP[c]	(1) cpd00001[c] + (1) cpd00068[c] --> (1) cpd00009[c] + (1) cpd00067[c] + (1) cpd00090[c]	0,10000	Purine metabolism
rxn09011	nucleoside-triphosphatase (dITP)	3.6.1.15	slr0402	(1) H2O[c] + (1) dITP[c] --> (1) Phosphate[c] + (1) H+[c] + (1) dIDP[c]	(1) cpd00001[c] + (1) cpd00977[c] --> (1) cpd00009[c] + (1) cpd00067[c] + (1) cpd00976[c]	0,10000	Purine metabolism
rxn09516	nucleoside-triphosphatase (dGTP)	3.6.1.15	slr0402	(1) H2O[c] + (1) dGTP[c] --> (1) Phosphate[c] + (1) H+[c] + (1) dGDP[c]	(1) cpd00001[c] + (1) cpd00241[c] --> (1) cpd00009[c] + (1) cpd00067[c] + (1) cpd00295[c]	0,10000	Purine metabolism
rxn02937	2-(Formamido)-N1-(5-phosphoribosyl)acetamidine cyclo-ligase	6.3.3.1	slr0838	(1) ATP[c] + (1) 5'-Phosphoribosylformylglycinamidine[c] --> (1) ADP[c] + (1) Phosphate[c] + (1) H+[c] + (1) Aminoimidazole ribotide[c]	(1) cpd00002[c] + (1) cpd02826[c] --> (1) cpd00008[c] + (1) cpd00009[c] + (1) cpd00067[c] + (1) cpd02140[c]	0,10000	Purine metabolism
rxn02895	5-Phospho-D-ribosylamine:glycine ligase (ADP-forming)	6.3.4.13	slr1159	(1) ATP[c] + (1) Glycine[c] + (1) 5-Phosphoribosylamine[c] --> (1) ADP[c] + (1) Phosphate[c] + (1) H+[c] + (1) GAR[c]	(1) cpd00002[c] + (1) cpd00033[c] + (1) cpd01982[c] --> (1) cpd00008[c] + (1) cpd00009[c] + (1) cpd00067[c] + (1) cpd02394[c]	0,10000	Purine metabolism
rxn00834	IMP:NAD+ oxidoreductase	1.1.1.205	slr1722	(1) H2O[c] + (1) NAD[c] + (1) IMP[c] --> (1) NADH[c] + (1) H+[c] + (1) XMP[c]	(1) cpd00001[c] + (1) cpd00003[c] + (1) cpd00114[c] --> (1) cpd00004[c] + (1) cpd00067[c] + (1) cpd00497[c]	0,10000	Purine metabolism
rxn00064	ATP aminohydrolase	3.5.4.18		(1) H2O[c] + (1) ATP[c] + (1) H+[c] --> (1) NH3[c] + (1) ITP[c]	(1) cpd00001[c] + (1) cpd00002[c] + (1) cpd00067[c] --> (1) cpd00013[c] + (1) cpd00068[c]	0,10000	Purine metabolism
rxn00131	AMP nucleosidase	3.2.2.4		(1) H2O[c] + (1) AMP[c] --> (1) ribose-5-phosphate[c] + (1) Adenine[c]	(1) cpd00001[c] + (1) cpd00018[c] --> (1) cpd00101[c] + (1) cpd00128[c]	0,10000	Purine metabolism
rxn01541	Cytidine hydrolase	3.2.2.8		(1) H2O[c] + (1) Cytidine[c] --> (1) Cytosine[c] + (1) D-Ribose[c]	(1) cpd00001[c] + (1) cpd00367[c] --> (1) cpd00307[c] + (1) cpd00105[c]	0,10000	Purine metabolism
rxn02938	1-(5-Phospho-D-ribosyl)-5-amino-4-imidazolecarboxylate carboxy-lyase	4.1.1.21	(sll0901 and sll0578)	(1) H+[c] + (1) 5'-Phosphoribosyl-4-carboxy-5-aminoimidazole[c] <=> (1) CO2[c] + (1) Aminoimidazole ribotide[c]	(1) cpd00067[c] + (1) cpd02893[c] <=> (1) cpd00011[c] + (1) cpd02140[c]	-10000,10000	Purine metabolism
rxn00104	ATP:polyphosphate phosphotransferase	2.7.4.1	sll0290	(1) ATP[c] + (1) PPi[c] <=> (1) ADP[c] + (1) H+[c] + (1) Triphosphate[c]	(1) cpd00002[c] + (1) cpd00012[c] <=> (1) cpd00008[c] + (1) cpd00067[c] + (1) cpd00421[c]	-10000,10000	Purine metabolism
rxn03136	1-(5'-Phosphoribosyl)-5-amino-4-(N-succinocarboxamide)-imidazole	4.3.2.2	sll0421	(1) SAICAR[c] <=> (1) Fumarate[c] + (1) AICAR[c]	(1) cpd02921[c] <=> (1) cpd00106[c] + (1) cpd02851[c]	-10000,10000	Purine metabolism
rxn00096	ADP:ATP adenylyltransferase	2.7.7.53	sll0509	(1) ATP[c] + (1) ADP[c] <=> (1) Phosphate[c] + (1) H+[c] + (1) AppppA[c]	(1) cpd00002[c] + (1) cpd00008[c] <=> (1) cpd00009[c] + (1) cpd00067[c] + (1) cpd00924[c]	-10000,10000	Purine metabolism
rxn00097	ATP:AMP phosphotransferase	2.7.4.3	sll1059	(1) ATP[c] + (1) AMP[c] <=> (2) ADP[c]	(1) cpd00002[c] + (1) cpd00018[c] <=> (2) cpd00008[c]	-10000,10000	Purine metabolism
rxn12778	adenine phosphoribosyltransferase	2.4.2.7	sll1430	(1) PPi[c] + (1) AICAR[c] <=> (1) PRPP[c] + (1) 5-Amino-4-imidazolecarboxyamide[c]	(1) cpd00012[c] + (1) cpd02851[c] <=> (1) cpd00103[c] + (1) cpd02506[c]	-10000,10000	Purine metabolism
rxn01127	ATP:AMP phosphotransferase	2.7.4.3	sll1815	(1) ATP[c] + (1) dAMP[c] <=> (1) ADP[c] + (1) dADP[c]	(1) cpd00002[c] + (1) cpd00294[c] <=> (1) cpd00008[c] + (1) cpd00177[c]	-10000,10000	Purine metabolism
rxn00237	ATP:nucleoside-diphosphate phosphatransferase	2.7.4.6	sll1852	(1) ATP[c] + (1) GDP[c] <=> (1) ADP[c] + (1) GTP[c]	(1) cpd00002[c] + (1) cpd00031[c] <=> (1) cpd00008[c] + (1) cpd00038[c]	-10000,10000	Purine metabolism
rxn00515	ATP:nucleoside-diphosphate phosphatransferase	2.7.4.6	sll1852	(1) ATP[c] + (1) IDP[c] <=> (1) ADP[c] + (1) ITP[c]	(1) cpd00002[c] + (1) cpd00090[c] <=> (1) cpd00008[c] + (1) cpd00068[c]	-10000,10000	Purine metabolism
rxn00839	ATP:nucleoside-diphosphate phosphatransferase	2.7.4.6	sll1852	(1) ATP[c] + (1) dADP[c] <=> (1) ADP[c] + (1) dATP[c]	(1) cpd00002[c] + (1) cpd00177[c] <=> (1) cpd00008[c] + (1) cpd00115[c]	-10000,10000	Purine metabolism
rxn01353	ATP:nucleoside-diphosphate phosphatransferase	2.7.4.6	sll1852	(1) ATP[c] + (1) dGDP[c] <=> (1) ADP[c] + (1) dGTP[c]	(1) cpd00002[c] + (1) cpd00295[c] <=> (1) cpd00008[c] + (1) cpd00241[c]	-10000,10000	Purine metabolism
rxn02517	ATP:nucleoside-diphosphate phosphatransferase	2.7.4.6	sll1852	(1) ATP[c] + (1) dIDP[c] <=> (1) ADP[c] + (1) dITP[c]	(1) cpd00002[c] + (1) cpd00976[c] <=> (1) cpd00008[c] + (1) cpd00977[c]	-10000,10000	Purine metabolism
rxn00832	IMP 1,2-hydrolase (decyclizing)	3.5.4.10	slr0597	(1) H2O[c] + (1) IMP[c] <=> (1) FAICAR[c]	(1) cpd00001[c] + (1) cpd00114[c] <=> (1) cpd02884[c]	-10000,10000	Purine metabolism
rxn00239	ATP:(d)GMP phosphotransferase	2.7.4.8	slr1123	(1) ATP[c] + (1) GMP[c] <=> (1) ADP[c] + (1) GDP[c]	(1) cpd00002[c] + (1) cpd00126[c] <=> (1) cpd00008[c] + (1) cpd00031[c]	-10000,10000	Purine metabolism
rxn01509	ATP:(d)GMP phosphotransferase	2.7.4.8	slr1123	(1) ATP[c] + (1) dGMP[c] <=> (1) ADP[c] + (1) dGDP[c]	(1) cpd00002[c] + (1) cpd00296[c] <=> (1) cpd00008[c] + (1) cpd00295[c]	-10000,10000	Purine metabolism
rxn03147	1-(5-Phosphoribosyl)-5-amino-4-carboxyimidazole:L-aspartate ligase	6.3.2.6	slr1226	(1) ATP[c] + (1) L-Aspartate[c] + (1) 5'-Phosphoribosyl-4-carboxy-5-aminoimidazole[c] <=> (1) ADP[c] + (1) Phosphate[c] + (2) H+[c] + (1) SAICAR[c]	(1) cpd00002[c] + (1) cpd00041[c] + (1) cpd02893[c] <=> (1) cpd00008[c] + (1) cpd00009[c] + (2) cpd00067[c] + (1) cpd02921[c]	-10000,10000	Purine metabolism
rxn01138	Adenosine:orthophosphate ribosyltransferase	2.4.2.1		(1) Phosphate[c] + (1) H+[c] + (1) Adenosine[c] <=> (1) Adenine[c] + (1) Ribose 1-phosphate[c]	(1) cpd00009[c] + (1) cpd00067[c] + (1) cpd00182[c] <=> (1) cpd00128[c] + (1) cpd00475[c]	-10000,10000	Purine metabolism
rxn07456	Carbamoyl-phosphate synthase (glutamine-hydrolysing)	6.3.5.5	sll1498 and sll0370	(2) ATP[c] + (1) NH3[c] + (1) Bicarbonate[c] --> (2) ADP[c] + (1) Phosphate[c] + (1) H+[c] + (1) Carbamoylphosphate[c]	(2) cpd00002[c] + (1) cpd00013[c] + (1) cpd00242[c] --> (2) cpd00008[c] + (1) cpd00009[c] + (1) cpd00067[c] + (1) cpd00146[c]	0,10000	Purine and Pyrimidine Metabolism
rxn05229	NCAIR synthetase and NCAIR mutase	Undetermined		(1) ATP[c] + (1) Bicarbonate[c] + (1) Aminoimidazole ribotide[c] --> (1) ADP[c] + (1) Phosphate[c] + (1) H+[c] + (1) 5'-Phosphoribosyl-4-carboxy-5-aminoimidazole[c]	(1) cpd00002[c] + (1) cpd00242[c] + (1) cpd02140[c] --> (1) cpd00008[c] + (1) cpd00009[c] + (1) cpd00067[c] + (1) cpd02893[c]	0,10000	Purine and Pyrimidine Metabolism
rxn10053	phosphoribosylaminoimidazole carboxylase (ATP-dependent)	Undetermined		(1) H2O[c] + (1) ATP[c] + (1) CO2[c] + (1) Aminoimidazole ribotide[c] --> (1) ADP[c] + (1) Phosphate[c] + (2) H+[c] + (1) 5'-Phosphoribosyl-4-carboxy-5-aminoimidazole[c]	(1) cpd00001[c] + (1) cpd00002[c] + (1) cpd00011[c] + (1) cpd02140[c] --> (1) cpd00008[c] + (1) cpd00009[c] + (2) cpd00067[c] + (1) cpd02893[c]	0,10000	Purine and Pyrimidine Metabolism
rxn00114	ATP:carbamate phosphotransferase	2.7.2.2	sll0573	(1) ATP[c] + (1) CO2[c] + (1) NH3[c] <=> (1) ADP[c] + (1) H+[c] + (1) Carbamoylphosphate[c]	(1) cpd00002[c] + (1) cpd00011[c] + (1) cpd00013[c] <=> (1) cpd00008[c] + (1) cpd00067[c] + (1) cpd00146[c]	-10000,10000	Purine and Pyrimidine Metabolism
rxn00533	Acetyl-CoA:carbon-dioxide ligase (ADP-forming)	6.4.1.2	(sll0728 and slr0435 and sll0053 and sll0336)	(1) ATP[c] + (1) Acetyl-CoA[c] + (1) Bicarbonate[c] <=> (1) ADP[c] + (1) Phosphate[c] + (1) H+[c] + (1) Malonyl-CoA[c]	(1) cpd00002[c] + (1) cpd00022[c] + (1) cpd00242[c] <=> (1) cpd00008[c] + (1) cpd00009[c] + (1) cpd00067[c] + (1) cpd00070[c]	-10000,10000	Propanoate metabolism, Pyruvate metabolism
rxn00285	Succinate:CoA ligase (ADP-forming)	6.2.1.5	(sll1023 and sll1557)	(1) ATP[c] + (1) CoA[c] + (1) Succinate[c] <=> (1) ADP[c] + (1) Phosphate[c] + (1) Succinyl-CoA[c]	(1) cpd00002[c] + (1) cpd00010[c] + (1) cpd00036[c] <=> (1) cpd00008[c] + (1) cpd00009[c] + (1) cpd00078[c]	-10000,10000	Propanoate metabolism, Citrate cycle (TCA cycle), Reductive carboxylate cycle (CO2 fixation)
rxn00985	ATP:acetate phosphotransferase	2.7.2.1	sll1299 and slr2035	(1) ADP[c] + (1) Propionyl phosphate[c] --> (1) ATP[c] + (1) H+[c] + (1) Propionate[c]	(1) cpd00008[c] + (1) cpd01844[c] --> (1) cpd00002[c] + (1) cpd00067[c] + (1) cpd00141[c]	0,10000	Propanoate metabolism
rxn08110	aldehyde dehydrogenase (propanal, NADP)	Undetermined		(1) H2O[c] + (1) NADP[c] + (1) Propanal[c] --> (1) NADPH[c] + (2) H+[c] + (1) Propionate[c]	(1) cpd00001[c] + (1) cpd00006[c] + (1) cpd00371[c] --> (1) cpd00005[c] + (2) cpd00067[c] + (1) cpd00141[c]	0,10000	Propanoate metabolism
rxn00501	3-Oxopropanoate:NAD+ oxidoreductase (decarboxylating,	1.2.1.18 and 1.2.1.27	slr0091	(1) NAD[c] + (1) CoA[c] + (1) 3-Oxopropanoate[c] <=> (1) NADH[c] + (1) CO2[c] + (1) Acetyl-CoA[c]	(1) cpd00003[c] + (1) cpd00010[c] + (1) cpd00191[c] <=> (1) cpd00004[c] + (1) cpd00011[c] + (1) cpd00022[c]	-10000,10000	Propanoate metabolism
rxn09944	methylmalonate-semialdehyde dehydrogenase (propanol)	1.2.1.27	slr0370	(1) NAD[c] + (1) CoA[c] + (1) Propanal[c] <=> (1) NADH[c] + (1) H+[c] + (1) Propionyl-CoA[c]	(1) cpd00003[c] + (1) cpd00010[c] + (1) cpd00371[c] <=> (1) cpd00004[c] + (1) cpd00067[c] + (1) cpd00086[c]	-10000,10000	Propanoate metabolism
rxn00656	L-Alanine:3-oxopropanoate aminotransferase	2.6.1.18	slr1022	(1) L-Alanine[c] + (1) 3-Oxopropanoate[c] <=> (1) Pyruvate[c] + (1) beta-Alanine[c]	(1) cpd00035[c] + (1) cpd00191[c] <=> (1) cpd00020[c] + (1) cpd00085[c]	-10000,10000	Propanoate metabolism
rxn04704	coproporphyrinogen-III:S-adenosyl-L-methionine	1.3.99.22	(sll1917) or (sll1876)	(2) S-Adenosyl-L-methionine[c] + (1) Coproporphyrinogen III[c] --> (2) CO2[c] + (2) L-Methionine[c] + (1) ProtoporphyrinogenIX[c] + (2) 5'-Deoxyadenosine[c]	(2) cpd00017[c] + (1) cpd02083[c] --> (2) cpd00011[c] + (2) cpd00060[c] + (1) cpd00791[c] + (2) cpd03091[c]	0,10000	Porphyrin and chlorophyll metabolism
rxn06887	Hydrogenobyrinate <=> Hydrogenobyrinate a,c diamide		sll1501	(2) H2O[c] + (2) ATP[c] + (2) L-Glutamine[c] + (1) Hydrogenobyrinate[c] --> (2) ADP[c] + (2) Phosphate[c] + (2) L-Glutamate[c] + (2) H+[c] + (1) Hydrogenobyrinate diamide[c]	(2) cpd00001[c] + (2) cpd00002[c] + (2) cpd00053[c] + (1) cpd03832[c] --> (2) cpd00008[c] + (2) cpd00009[c] + (2) cpd00023[c] + (2) cpd00067[c] + (1) cpd03913[c]	0,10000	Porphyrin and chlorophyll metabolism
rxn04159	chlorophyllide-a:NADP+ oxidoreductase	1.3.1.75	((slr0749 and slr0750 and slr0772) or slr0506)	(1) NADPH[c] + (1) H+[c] + (1) Divinyl chlorophyllide a[c] --> (1) NADP[c] + (1) Chlorophyllide[c]	(1) cpd00005[c] + (1) cpd00067[c] + (1) cpd08632[c] --> (1) cpd00006[c] + (1) cpd01449[c]	0,10000	Porphyrin and chlorophyll metabolism
rxn03512	Precorrin 8X 11,12-methylmutase	5.4.1.2	(sll0794) or (sll0916) or (slr1467)	(1) H+[c] + (1) Precorrin 8[c] --> (1) Hydrogenobyrinate[c]	(1) cpd00067[c] + (1) cpd03835[c] --> (1) cpd03832[c]	0,10000	Porphyrin and chlorophyll metabolism
rxn03393	Octaprenyl-hydroxybenzoate decarboxylase	4.1.1.-	(sll0936) or (slr1099)	(1) H+[c] + (1) 3-Octaprenyl-4-hydroxybenzoate[c] --> (1) CO2[c] + (1) 2-Octaprenylphenol[c]	(1) cpd00067[c] + (1) cpd03443[c] --> (1) cpd00011[c] + (1) cpd03444[c]	0,10000	Porphyrin and chlorophyll metabolism
rxn06455	Hemoglobin:oxygen oxidoreductase (alpha-methylene-oxydizing,	1.14.99.3	(sll1184) or (sll1875)	(3) O2[c] + (1) FADH2[c] + (1) Hemoglobin[c] --> (3) H2O[c] + (1) FAD[c] + (1) CO[c] + (1) Biliverdin[c] + (1) Fe3+[c] + (1) Globin[c]	(3) cpd00007[c] + (1) cpd00982[c] + (1) cpd11940[c] --> (3) cpd00001[c] + (1) cpd00015[c] + (1) cpd00204[c] + (1) cpd00389[c] + (1) cpd10516[c] + (1) cpd12850[c]	0,10000	Porphyrin and chlorophyll metabolism
rxn02303	Coproporphyrinogen:oxygen oxidoreductase(decarboxylating)	1.3.3.3	(sll1185)	(1) O2[c] + (2) H+[c] + (1) Coproporphyrinogen III[c] --> (2) H2O[c] + (2) CO2[c] + (1) ProtoporphyrinogenIX[c]	(1) cpd00007[c] + (2) cpd00067[c] + (1) cpd02083[c] --> (2) cpd00001[c] + (2) cpd00011[c] + (1) cpd00791[c]	0,10000	Porphyrin and chlorophyll metabolism
rxn01629	(S)-4-Amino-5-oxopentanoate 4,5-aminomutase	5.4.3.8	sll0017	(1) L-Glutamate1-semialdehyde[c] --> (1) 5-Aminolevulinate[c]	(1) cpd02345[c] --> (1) cpd00338[c]	0,10000	Porphyrin and chlorophyll metabolism
rxn03491	S-Adenosyl-L-methionine:1-precorrin-6Y C5,15-methyltransferase	2.1.1.132	sll0099	(2) S-Adenosyl-L-methionine[c] + (1) Precorrin 6B[c] --> (1) CO2[c] + (2) S-Adenosyl-homocysteine[c] + (2) H+[c] + (1) Precorrin 8[c]	(2) cpd00017[c] + (1) cpd03760[c] --> (1) cpd00011[c] + (2) cpd00019[c] + (2) cpd00067[c] + (1) cpd03835[c]	0,10000	Porphyrin and chlorophyll metabolism
rxn02264	Hydroxymethylbilane hydro-lyase(cyclizing)	4.2.1.75	sll0166	(1) Hydroxymethylbilane[c] --> (1) H2O[c] + (1) UroporphyrinogenIII[c]	(1) cpd00755[c] --> (1) cpd00001[c] + (1) cpd00774[c]	0,10000	Porphyrin and chlorophyll metabolism
rxn05005	S-adenosyl-L-methionine:uroporphyrinogen-III C-methyltransferase	2.1.1.107	sll0378	(1) S-Adenosyl-L-methionine[c] + (1) UroporphyrinogenIII[c] --> (1) S-Adenosyl-homocysteine[c] + (1) H+[c] + (1) Precorrin 1[c]	(1) cpd00017[c] + (1) cpd00774[c] --> (1) cpd00019[c] + (1) cpd00067[c] + (1) cpd11206[c]	0,10000	Porphyrin and chlorophyll metabolism
rxn05006	S-adenosyl-L-methionine:precorrin-1 C-methyltransferase	2.1.1.107	sll0378	(1) S-Adenosyl-L-methionine[c] + (1) Precorrin 1[c] --> (1) S-Adenosyl-homocysteine[c] + (1) H+[c] + (1) Precorrin 2[c]	(1) cpd00017[c] + (1) cpd11206[c] --> (1) cpd00019[c] + (1) cpd00067[c] + (1) cpd01620[c]	0,10000	Porphyrin and chlorophyll metabolism
rxn04152	magnesium-protoporphyrin-IX 13-monomethyl ester,NADPH:oxygen (aerobic)	1.14.13.81	sll1214	(1) NADPH[c] + (1) O2[c] + (1) H+[c] + (1) Mg-Protoporphyrin IX 13-monomethyl ester[c] --> (1) H2O[c] + (1) NADP[c] + (1) 13(1)-Hydroxy-Mg-protoporphyrin IX 13-monomethyl ester[c]	(1) cpd00005[c] + (1) cpd00007[c] + (1) cpd00067[c] + (1) cpd02762[c] --> (1) cpd00001[c] + (1) cpd00006[c] + (1) cpd08629[c]	0,10000	Porphyrin and chlorophyll metabolism
rxn04153	magnesium-protoporphyrin-IX 13-monomethyl ester,NADPH:oxygen (aerobic)	1.14.13.81	sll1214	(1) NADPH[c] + (1) O2[c] + (1) H+[c] + (1) 13(1)-Hydroxy-Mg-protoporphyrin IX 13-monomethyl ester[c] --> (2) H2O[c] + (1) NADP[c] + (1) 13(1)-Oxo-Mg-protoporphyrin IX 13-monomethyl ester[c]	(1) cpd00005[c] + (1) cpd00007[c] + (1) cpd00067[c] + (1) cpd08629[c] --> (2) cpd00001[c] + (1) cpd00006[c] + (1) cpd08630[c]	0,10000	Porphyrin and chlorophyll metabolism
rxn04154	magnesium-protoporphyrin-IX 13-monomethyl ester,NADPH:oxygen (aerobic)	1.14.13.81	sll1214	(1) NADPH[c] + (1) O2[c] + (1) 13(1)-Oxo-Mg-protoporphyrin IX 13-monomethyl ester[c] --> (2) H2O[c] + (1) NADP[c] + (1) Divinylprotochlorophyllide[c]	(1) cpd00005[c] + (1) cpd00007[c] + (1) cpd08630[c] --> (2) cpd00001[c] + (1) cpd00006[c] + (1) cpd08631[c]	0,10000	Porphyrin and chlorophyll metabolism
rxn04152_an	magnesium-protoporphyrin-IX 13-monomethyl ester,NADPH:oxygen (anaerobic)	1.14.13.81	sll1214 and sll1874	(1) NADPH[c] + (1) O2[c] + (1) H+[c] + (1) Mg-Protoporphyrin IX 13-monomethyl ester[c] --> (1) H2O[c] + (1) NADP[c] + (1) 13(1)-Hydroxy-Mg-protoporphyrin IX 13-monomethyl ester[c]	(1) cpd00005[c] + (1) cpd00007[c] + (1) cpd00067[c] + (1) cpd02762[c] --> (1) cpd00001[c] + (1) cpd00006[c] + (1) cpd08629[c]	0,10000	Porphyrin and chlorophyll metabolism
rxn04153_an	magnesium-protoporphyrin-IX 13-monomethyl ester,NADPH:oxygen (anaerobic)	1.14.13.81	sll1214 and sll1874	(1) NADPH[c] + (1) O2[c] + (1) H+[c] + (1) 13(1)-Hydroxy-Mg-protoporphyrin IX 13-monomethyl ester[c] --> (2) H2O[c] + (1) NADP[c] + (1) 13(1)-Oxo-Mg-protoporphyrin IX 13-monomethyl ester[c]	(1) cpd00005[c] + (1) cpd00007[c] + (1) cpd00067[c] + (1) cpd08629[c] --> (2) cpd00001[c] + (1) cpd00006[c] + (1) cpd08630[c]	0,10000	Porphyrin and chlorophyll metabolism
rxn04154_an	magnesium-protoporphyrin-IX 13-monomethyl ester,NADPH:oxygen (anaerobic)	1.14.13.81	sll1214 and sll1874	(1) NADPH[c] + (1) O2[c] + (1) 13(1)-Oxo-Mg-protoporphyrin IX 13-monomethyl ester[c] --> (2) H2O[c] + (1) NADP[c] + (1) Divinylprotochlorophyllide[c]	(1) cpd00005[c] + (1) cpd00007[c] + (1) cpd08630[c] --> (2) cpd00001[c] + (1) cpd00006[c] + (1) cpd08631[c]	0,10000	Porphyrin and chlorophyll metabolism
THRPD	threonine-phosphate decarboxylase	4.1.1.81	sll1713	(1) H+[c] + (1) L-Threonine phosphate[c] --> (1) CO2[c] + (1) (R)-1-Aminopropan-2-yl phosphate[c]	(1) cpd00067[c] + (1) cpd08928[c] --> (1) cpd00011[c] + (1) cpd02547[c]	0,10000	Porphyrin and chlorophyll metabolism
rxn12825	Heme A synthase		sll1898	(1) H2O[c] + (1) hemeO[c] --> (4) H+[c] + (1) hemeA[c]	(1) cpd00001[c] + (1) cpd11313[c] --> (4) cpd00067[c] + (1) cpd11312[c]	0,10000	Porphyrin and chlorophyll metabolism
rxn08707	Heme O synthase	2.5.1.-	sll1899	(1) H2O[c] + (1) Heme[c] + (1) Farnesyldiphosphate[c] --> (1) PPi[c] + (1) hemeO[c]	(1) cpd00001[c] + (1) cpd00028[c] + (1) cpd00350[c] --> (1) cpd00012[c] + (1) cpd11313[c]	0,10000	Porphyrin and chlorophyll metabolism
rxn00029	5-Aminolevulinate hydro-lyase(adding 5-aminolevulinate and	4.2.1.24	sll1994	(2) 5-Aminolevulinate[c] --> (2) H2O[c] + (1) H+[c] + (1) Porphobilinogen[c]	(2) cpd00338[c] --> (2) cpd00001[c] + (1) cpd00067[c] + (1) cpd00689[c]	0,10000	Porphyrin and chlorophyll metabolism
rxn04161	chlorophyllide-a:phytyl-diphosphate phytyltransferase	2.5.1.62	slr0056	(1) Chlorophyllide[c] + (1) Phytyl diphosphate[c] --> (1) PPi[c] + (1) Chlorophyll a[c]	(1) cpd01449[c] + (1) cpd03214[c] --> (1) cpd00012[c] + (1) cpd03148[c]	0,10000	Porphyrin and chlorophyll metabolism
phytol_salvage	CTP:phytol O-phosphotransferase	2.7.1.182	slr1652	(1) Phytol[c] + (2) CTP[c] --> (1) Phytyl diphosphate[c] + (2) CDP[c]	(1) cpd00999[c] + (2) cpd00052[c] --> (1) cpd03214[c] + (2) cpd00096[c]	0,10000	Porphyrin and chlorophyll metabolism
rxn04161	chlorophyllide-a:phytyl-diphosphate phytyltransferase	2.5.1.62	slr0056	(1) Chlorophyllide[c] + (1) Phytyl diphosphate[c] --> (1) PPi[c] + (1) Chlorophyll a[c]	(1) cpd01449[c] + (1) cpd03214[c] --> (1) cpd00012[c] + (1) cpd03148[c]	0,10000	Porphyrin and chlorophyll metabolism
rxn03537	Adenosyl cobinamide phosphate guanyltransferase	2.7.1.156	slr0216	(1) GTP[c] + (1) H+[c] + (1) Adenosyl cobinamide phosphate[c] --> (1) PPi[c] + (1) Adenosylcobinamide-GDP[c]	(1) cpd00038[c] + (1) cpd00067[c] + (1) cpd03919[c] --> (1) cpd00012[c] + (1) cpd03920[c]	0,10000	Porphyrin and chlorophyll metabolism
rxn03514	S-adenosyl-L-methionine:precorrin-4 C11 methyltransferase	2.1.1.133	slr0239	(1) S-Adenosyl-L-methionine[c] + (1) Precorrin 4[c] --> (1) S-Adenosyl-homocysteine[c] + (1) H+[c] + (1) Precorrin 5[c]	(1) cpd00017[c] + (1) cpd03834[c] --> (1) cpd00019[c] + (1) cpd00067[c] + (1) cpd03839[c]	0,10000	Porphyrin and chlorophyll metabolism
rxn03492	precorrin-6Y:NADP+ oxidoreductase	1.3.1.54	slr0252	(1) NADPH[c] + (1) H+[c] + (1) Precorrin 6A[c] --> (1) NADP[c] + (1) Precorrin 6B[c]	(1) cpd00005[c] + (1) cpd00067[c] + (1) cpd03761[c] --> (1) cpd00006[c] + (1) cpd03760[c]	0,10000	Porphyrin and chlorophyll metabolism
rxn03535	ATP:cob(I)yrinic acid-a,c-diamide Cobeta-adenosyltransferase	2.5.1.17	slr0260	(1) ATP[c] + (1) Cob(I)yrinate diamide[c] --> (1) Triphosphate[c] + (1) Adenosyl cobyrinate diamide[c]	(1) cpd00002[c] + (1) cpd03915[c] --> (1) cpd00421[c] + (1) cpd03916[c]	0,10000	Porphyrin and chlorophyll metabolism
rxn02959	S-adenosyl-L-methionine:magnesium-protoporphyrin-IX	2.1.1.11	slr0525	(1) S-Adenosyl-L-methionine[c] + (1) Mg-protoporphyrin IX[c] --> (1) S-Adenosyl-homocysteine[c] + (1) Mg-Protoporphyrin IX 13-monomethyl ester[c]	(1) cpd00017[c] + (1) cpd02216[c] --> (1) cpd00019[c] + (1) cpd02762[c]	0,10000	Porphyrin and chlorophyll metabolism
rxn02288	Uroporphyrinogen-III carboxy-lyase	4.1.1.37	slr0536	(4) H+[c] + (1) UroporphyrinogenIII[c] --> (4) CO2[c] + (1) Coproporphyrinogen III[c]	(4) cpd00067[c] + (1) cpd00774[c] --> (4) cpd00011[c] + (1) cpd02083[c]	0,10000	Porphyrin and chlorophyll metabolism
rxn03384	Uroporphyrinogen I carboxy-lyase	4.1.1.37	slr0536	(4) H+[c] + (1) UroporphyrinogenI[c] --> (4) CO2[c] + (1) CoproporphyrinogenI[c]	(4) cpd00067[c] + (1) cpd03414[c] --> (4) cpd00011[c] + (1) cpd03416[c]	0,10000	Porphyrin and chlorophyll metabolism
rxn03540	adenosylcobyric acid synthase (glutamine-hydrolysing)	6.3.5.10	slr0618	(4) H2O[c] + (4) ATP[c] + (4) L-Glutamine[c] + (1) Adenosyl cobyrinate diamide[c] --> (4) ADP[c] + (4) Phosphate[c] + (4) L-Glutamate[c] + (4) H+[c] + (1) Adenosylcobyric acid[c]	(4) cpd00001[c] + (4) cpd00002[c] + (4) cpd00053[c] + (1) cpd03916[c] --> (4) cpd00008[c] + (4) cpd00009[c] + (4) cpd00023[c] + (4) cpd00067[c] + (1) cpd03917[c]	0,10000	Porphyrin and chlorophyll metabolism
rxn03538	Adenosylcobalamin 5'-phosphate synthase	2.7.8.26	slr0636	(1) Adenosylcobinamide-GDP[c] + (1) alpha-Ribazole[c] --> (1) Calomide[c] + (1) GMP[c]	(1) cpd03920[c] + (1) cpd03423[c] --> (1) cpd00166[c] + (1) cpd00126[c]	0,10000	Porphyrin and chlorophyll metabolism
rxn00224	Protoporphyrin ferro-lyase	4.99.1.1	slr0839	(1) Protoporphyrin[c] + (1) Fe2+[c] --> (1) Heme[c] + (2) H+[c]	(1) cpd01476[c] + (1) cpd10515[c] --> (1) cpd00028[c] + (2) cpd00067[c]	0,10000	Porphyrin and chlorophyll metabolism
MPOMC2	magnesium-protoporphyrin-IX 13-monomethyl ester,NADPH:h2o oxidoreductase (hydroxylating) (anaerobic)		slr0905	(1) H2O[c] + (1) NADP[c] + (1) Mg-Protoporphyrin IX 13-monomethyl ester[c] --> (1) H+[c] + (1) NADPH[c] + (1) 13(1)-Hydroxy-Mg-protoporphyrin IX 13-monomethyl ester[c]	(1) cpd00001[c] + (1) cpd00006[c] + (1) cpd02762[c] --> (1) cpd00067[c] + (1) cpd00005[c] + (1) cpd08629[c]	0,10000	Porphyrin and chlorophyll metabolism
MPOMMM2	magnesium-protoporphyrin-IX 13-monomethyl ester,NADPH: (anaerobic)		slr0905	(1) NADP[c] + (1) 13(1)-Hydroxy-Mg-protoporphyrin IX 13-monomethyl ester[c] --> (1) H+[c] + (1) NADPH[c] + (1) 13(1)-Oxo-Mg-protoporphyrin IX 13-monomethyl ester[c]	(1) cpd00006[c] + (1) cpd08629[c] --> (1) cpd00067[c] + (1) cpd00005[c] + (1) cpd08630[c]	0,10000	Porphyrin and chlorophyll metabolism
MPOMOR2	magnesium-protoporphyrin-IX 13-monomethyl ester,NADPH (anaerobic)		slr0905	(1) NADP[c] + (1) 13(1)-Oxo-Mg-protoporphyrin IX 13-monomethyl ester[c] --> (2) H+[c] + (1) NADPH[c] + (1) Divinylprotochlorophyllide[c]	(1) cpd00006[c] + (1) cpd08630[c] --> (2) cpd00067[c] + (1) cpd00005[c] + (1) cpd08631[c]	0,10000	Porphyrin and chlorophyll metabolism
rxn03513	S-Adenosyl-L-methionine:precorrin-3B C17-methyltransferase	2.1.1.131	slr0969	(1) S-Adenosyl-L-methionine[c] + (1) Precorrin 3B[c] --> (1) S-Adenosyl-homocysteine[c] + (2) H+[c] + (1) Precorrin 4[c]	(1) cpd00017[c] + (1) cpd03833[c] --> (1) cpd00019[c] + (2) cpd00067[c] + (1) cpd03834[c]	0,10000	Porphyrin and chlorophyll metabolism
rxn01723	Bilirubin:NADP+ oxidoreductase	1.3.1.24	slr1784	(1) NADP[c] + (1) Bilirubin[c] --> (1) NADPH[c] + (1) H+[c] + (1) Biliverdin[c]	(1) cpd00006[c] + (1) cpd00376[c] --> (1) cpd00005[c] + (1) cpd00067[c] + (1) cpd00389[c]	0,10000	Porphyrin and chlorophyll metabolism
rxn09179	protoporphyrinogen oxidase (aerobic)	1.3.3.4	slr1790	(1.5) O2[c] + (1) ProtoporphyrinogenIX[c] --> (3) H2O[c] + (1) Protoporphyrin[c]	(1.5) cpd00007[c] + (1) cpd00791[c] --> (3) cpd00001[c] + (1) cpd01476[c]	0,10000	Porphyrin and chlorophyll metabolism
rxn06591	L-glutamate-semialdehyde: NADP+		slr1808	(1) NADPH[c] + (1) H+[c] + (1) L-Glutamyl-tRNA-Glu[c] --> (1) NADP[c] + (1) L-Glutamate1-semialdehyde[c] + (1) tRNA-Glu[c]	(1) cpd00005[c] + (1) cpd00067[c] + (1) cpd12227[c] --> (1) cpd00006[c] + (1) cpd02345[c] + (1) cpd11912[c]	0,10000	Porphyrin and chlorophyll metabolism
rxn02775	S-Adenosyl-L-methionine:precorrin-4 C20-methyltransferase	2.1.1.130	slr1879	(1) S-Adenosyl-L-methionine[c] + (1) H+[c] + (1) Precorrin 2[c] --> (1) S-Adenosyl-homocysteine[c] + (1) Precorrin 3A[c]	(1) cpd00017[c] + (1) cpd00067[c] + (1) cpd01620[c] --> (1) cpd00019[c] + (1) cpd03420[c]	0,10000	Porphyrin and chlorophyll metabolism
rxn00060	Porphobilinogen ammonia-lyase (polymerizing)	2.5.1.61	slr1887	(1) H2O[c] + (4) Porphobilinogen[c] --> (4) NH3[c] + (1) Hydroxymethylbilane[c]	(1) cpd00001[c] + (4) cpd00689[c] --> (4) cpd00013[c] + (1) cpd00755[c]	0,10000	Porphyrin and chlorophyll metabolism
rxn04384	adenosylcobyric acid:(R)-1-aminopropan-2-yl phosphate ligase	6.3.1.10	slr1925	(1) ATP[c] + (1) (R)-1-Aminopropan-2-yl phosphate[c] + (1) Adenosylcobyric acid[c] --> (1) ADP[c] + (1) Phosphate[c] + (2) H+[c] + (1) Adenosyl cobinamide phosphate[c]	(1) cpd00002[c] + (1) cpd02547[c] + (1) cpd03917[c] --> (1) cpd00008[c] + (1) cpd00009[c] + (2) cpd00067[c] + (1) cpd03919[c]	0,10000	Porphyrin and chlorophyll metabolism
rxn05054	adenosylcobyric acid:(R)-1-aminopropan-2-ol ligase (ADP-forming)	6.3.1.10	slr1925	(1) ATP[c] + (1) (R)-1-Amino-2-propanol[c] + (1) Adenosylcobyric acid[c] --> (1) ADP[c] + (1) Phosphate[c] + (1) H+[c] + (1) Adenosyl cobinamide[c]	(1) cpd00002[c] + (1) cpd02039[c] + (1) cpd03917[c] --> (1) cpd00008[c] + (1) cpd00009[c] + (1) cpd00067[c] + (1) cpd03918[c]	0,10000	Porphyrin and chlorophyll metabolism
rxn00068	NADH:Fe2+ oxidoreductase	1.16.1.7	slr7059	(1) NADH[c] + (2) Fe3+[c] --> (1) NAD[c] + (1) H+[c] + (2) Fe2+[c]	(1) cpd00004[c] + (2) cpd10516[c] --> (1) cpd00003[c] + (1) cpd00067[c] + (2) cpd10515[c]	0,10000	Porphyrin and Chlorophyll Metabolism
CYRDAR	cob(II)yrinic acid a,c-diamide reductase			(1) NADH[c] + (2) Cob(II)yrinate diamide[c] --> (1) H+[c] + (1) NAD[c] + (2) Cob(I)yrinate diamide[c]	(1) cpd00004[c] + (2) cpd03914[c] --> (1) cpd00067[c] + (1) cpd00003[c] + (2) cpd03915[c]	0,10000	Porphyrin and chlorophyll metabolism
R05217	Precorrin 3A + Oxygen <=> Precorrin 3B			(0.5) O2[c] + (1) Precorrin 3A[c] --> (1) Precorrin 3B[c]	(0.5) cpd00007[c] + (1) cpd03420[c] --> (1) cpd03833[c]	0,10000	Porphyrin and chlorophyll metabolism
rxn02287	rxn02287			(2) S-Adenosyl-L-methionine[c] + (1) UroporphyrinogenIII[c] --> (2) S-Adenosyl-homocysteine[c] + (2) H+[c] + (1) Precorrin 2[c]	(2) cpd00017[c] + (1) cpd00774[c] --> (2) cpd00019[c] + (2) cpd00067[c] + (1) cpd01620[c]	0,10000	Porphyrin and chlorophyll metabolism
rxn04049	Precorrin 5 <=> Precorrin 6X			(1) H2O[c] + (1) S-Adenosyl-L-methionine[c] + (1) Precorrin 5[c] --> (2) H+[c] + (1) Acetate[c] + (1) S-Adenosyl-homocysteine[c] + (1) Precorrin 6A[c]	(1) cpd00001[c] + (1) cpd00017[c] + (1) cpd03839[c] --> (2) cpd00067[c] + (1) cpd00029[c] + (1) cpd00019[c] + (1) cpd03761[c]	0,10000	Porphyrin and chlorophyll metabolism
rxn04162	chlorophyllide-a:NADP+ 7,8-oxidoreductase			(1) NADPH[c] + (2) H+[c] + (1) Divinylprotochlorophyllide[c] --> (1) NADP[c] + (1) Divinyl chlorophyllide a[c]	(1) cpd00005[c] + (2) cpd00067[c] + (1) cpd08631[c] --> (1) cpd00006[c] + (1) cpd08632[c]	0,10000	Porphyrin and chlorophyll metabolism
rxn08491	Fe(III) reduction	Undetermined		(1) FADH2[c] + (2) Fe3+[c] --> (1) FAD[c] + (2) H+[c] + (2) Fe2+[c]	(1) cpd00982[c] + (2) cpd10516[c] --> (1) cpd00015[c] + (2) cpd00067[c] + (2) cpd10515[c]	0,10000	Porphyrin and Chlorophyll Metabolism
THRPS	threonine-phosphate synthase			(1) ATP[c] + (1) L-Threonine[c] --> (1) ADP[c] + (1) L-Threonine phosphate[c]	(1) cpd00002[c] + (1) cpd00161[c] --> (1) cpd00008[c] + (1) cpd08928[c]	0,10000	Porphyrin and chlorophyll metabolism
rxn02733	Mg-protoporphyrin IX magnesium-lyase	6.6.1.1	(slr1030) and (slr1055) and (slr1777)	(1) H2O[c] + (1) ATP[c] + (1) Mg2+[c] + (1) Protoporphyrin[c] <=> (1) ADP[c] + (1) Phosphate[c] + (3) H+[c] + (1) Mg-protoporphyrin IX[c]	(1) cpd00001[c] + (1) cpd00002[c] + (1) cpd00254[c] + (1) cpd01476[c] <=> (1) cpd00008[c] + (1) cpd00009[c] + (3) cpd00067[c] + (1) cpd02216[c]	-10000,10000	Porphyrin and chlorophyll metabolism
rxn06980	(3Z)-phycocyanobilin:ferredoxin oxidoreductase	1.3.7.5	slr0116	(4) H+[c] + (1) Biliverdin[c] + (2) Reduced ferredoxin[c] <=> (1) (3Z)-Phycocyanobilin[c] + (2) Oxidized ferredoxin[c]	(4) cpd00067[c] + (1) cpd00389[c] + (2) cpfdxr22[c] <=> (1) cpd03427[c] + (2) cpfdxo22[c]	-10000,10000	Porphyrin and chlorophyll metabolism
rxn03536	Adenosyl cobinamide kinase	2.7.1.156	slr0216	(1) ATP[c] + (1) Adenosyl cobinamide[c] <=> (1) ADP[c] + (1) H+[c] + (1) Adenosyl cobinamide phosphate[c]	(1) cpd00002[c] + (1) cpd03918[c] <=> (1) cpd00008[c] + (1) cpd00067[c] + (1) cpd03919[c]	-10000,10000	Porphyrin and chlorophyll metabolism
rxn05029	ATP:cobinamide Cobeta-adenosyltransferase	2.5.1.17	slr0260	(1) ATP[c] + (1) Cobinamide[c] <=> (1) Triphosphate[c] + (1) Adenosyl cobinamide[c]	(1) cpd00002[c] + (1) cpd03422[c] <=> (1) cpd00421[c] + (1) cpd03918[c]	-10000,10000	Porphyrin and chlorophyll metabolism
rxn08194	cob(I)alamin adenosyltransferase	2.5.1.17	slr0260	(1) ATP[c] + (1) Cbl[c] <=> (1) Calomide[c] + (1) Triphosphate[c]	(1) cpd00002[c] + (1) cpd00635[c] <=> (1) cpd00166[c] + (1) cpd00421[c]	-10000,10000	Porphyrin and chlorophyll metabolism
rxn06456	rxn06456	Undetermined		(1) Hemoglobin[c] <=> (1) Heme[c] + (1) Globin[c]	(1) cpd11940[c] <=> (1) cpd00028[c] + (1) cpd12850[c]	-10000,10000	Porphyrin and chlorophyll metabolism
PHBS_syn	PHB synthetase		(slr1829) and (slr1830)	(1) 3-Hydroxybutyryl-CoA[c] + (1) Growing PHB granule[c] --> (1) CoA[c] + (1) PHB granule[c]	(1) cpd16898[c] + (1) cpd_phbg[c] --> (1) cpd00010[c] + (1) cmpd_PHB[c]	0,10000	Polyhydroxybutyrate biosynthesis
rxn12770	(3R)-3-Hydroxyacyl-CoA:NADP+ oxidoreductase	1.1.1.36	slr1994	(1) NADPH[c] + (1) 3-Oxohexanoyl-CoA[c] <=> (1) NADP[c] + (1) (R)-Hydroxyhexanoyl-CoA[c]	(1) cpd00005[c] + (1) cpd03123[c] <=> (1) cpd00006[c] + (1) cpd16757[c]	-10000,10000	Polyhydroxybutyrate biosynthesis
MSBQMT_p	Methyl solanyl benzoquinone methyl transferase (periplasm)	Undetermined	sll0418	(1) S-Adenosyl-L-methionine[c] + (1) 2-methyl-6-solanyl-1,4-benzoquinone[c] --> (1) S-Adenosyl-homocysteine[c] + (1) H+[c] + (1) Plastoquinol-9[p]	(1) cpd00017[c] + (1) cpd_msbq[c] --> (1) cpd00019[c] + (1) cpd00067[c] + (1) cpd16503[p]	0,10000	Plastoquinone Biosynthesis
MSBQMT_l	Methyl solanyl benzoquinone methyl transferase (lumen)	Undetermined	sll0418	(1) S-Adenosyl-L-methionine[c] + (1) 2-methyl-6-solanyl-1,4-benzoquinone[c] --> (1) S-Adenosyl-homocysteine[c] + (1) H+[c] + (1) Plastoquinol-9[l]	(1) cpd00017[c] + (1) cpd_msbq[c] --> (1) cpd00019[c] + (1) cpd00067[c] + (1) cpd16503[l]	0,10000	Plastoquinone Biosynthesis
SDPSYN	all-trans-nonaprenyl-diphosphate synthase [geranyl-diphosphate specific]	2.5.1.84	slr0611	(1) Geranyl diphosphate[c] + (7) Isopentenyldiphosphate[c] --> (1) Solanesyl diphosphate[c] + (7) PPi[c]	(1) cpd00283[c] + (7) cpd00113[c] --> (1) cpd02172[c] + (7) cpd00012[c]	0,10000	Plastoquinone Biosynthesis
HMST	homogentisate solanyltransferase	Undetermined	slr1736	(1) H+[c] + (1) Homogentisate[c] + (1) Solanesyl diphosphate[c] <=> (1) CO2[c] + (1) 2-methyl-6-solanyl-1,4-benzoquinone[c] + (1) PPi[c]	(1) cpd00067[c] + (1) cpd00426[c] + (1) cpd02172[c] <=> (1) cpd00011[c] + (1) cpd_msbq[c] + (1) cpd00012[c]	-10000,10000	Plastoquinone Biosynthesis
PSII	photosystem II		((sll1867 or slr1181 or slr1311) and slr0906 and sll0851 and ssr3451 and smr0006 and ssl2598 and sml0001 and smr0008 and sml0005 and smr0007 and sml0003 and smr0009 and sll1418 and slr1739 and sml0007 and (slr0927 or sll0849) and (sll0427 or Unknown_gene) and (sll1194 or Unknown_gene) and (sll0258 or Unknown_gene) and (sll1398 or Unknown_gene) and (sml0002 or Unknown_gene) and (slr1645 or Unknown…	(2) H+[c] + (1) Plastoquinone 9[l] + (1) H2O[l] + (2) Photosystem 2 photon[c] --> (2) H+[l] + (1) Plastoquinol-9[l] + (0.5) O2[l]	(2) cpd00067[c] + (1) cpd07274[l] + (1) cpd00001[l] + (2) hvphoton2[c] --> (2) cpd00067[l] + (1) cpd16503[l] + (0.5) cpd00007[l]	0,10000	Photosynthesis
MEHLER	Mehler reaction		(sll1521 or sll0550)	(1) H+[c] + (0.5) O2[c] + (1) NADPH[c] --> (1) H2O[c] + (1) NADP[c]	(1) cpd00067[c] + (0.5) cpd00007[c] + (1) cpd00005[c] --> (1) cpd00001[c] + (1) cpd00006[c]	0,10000	Photosynthesis
CYO1b_syn	cytochrome c oxidase, synechocystis (2 protons)	1.9.3.1	(slr1137 or slr2082) and (sll0813 or slr1136) and (slr1138 or slr2083)	(4) H+[c] + (2) Ferrocytochrome c6[l] + (0.5) O2[l] --> (2) H+[l] + (2) Ferricytochrome c6[l] + (1) H2O[l]	(4) cpd00067[c] + (2) focytc_6[l] + (0.5) cpd00007[l] --> (2) cpd00067[l] + (2) ficytc_6[l] + (1) cpd00001[l]	0,10000	Photosynthesis
CYO1b2_syn	cytochrome c oxidase, synechocystis (2 protons)	1.9.3.1	(slr1137 or slr2082) and (sll0813 or slr1136) and (slr1138 or slr2083)	(4) H+[c] + (2) Reduced plastocyanin[l] + (0.5) O2[l] --> (2) H+[l] + (2) Oxidized plastocyanin[l] + (1) H2O[l]	(4) cpd00067[c] + (2) cpd12239[l] + (0.5) cpd00007[l] --> (2) cpd00067[l] + (2) cpd12265[l] + (1) cpd00001[l]	0,10000	Photosynthesis
CYTBDu	cytochrome oxidase bd (plastocianine-8: 2 protons) (lumen)		(slr1379 and slr1380)	(1) Plastoquinol-9[l] + (0.5) O2[l] --> (1) Plastoquinone 9[l] + (1) H2O[l]	(1) cpd16503[l] + (0.5) cpd00007[l] --> (1) cpd07274[l] + (1) cpd00001[l]	0,10000	Photosynthesis
PSI	photosystem I (plastocyanin)		(slr1834 and slr1835 and ssl0563 and (slr0737 or smr0004) and sll0819 and sml0008 and (sll0629 or ssr0390) and slr1655 and smr0005 and (ssr2831 or Unknown_gene))	(2) Reduced plastocyanin[l] + (2) Oxidized ferredoxin[c] + (2) Photosystem 1 photon[c] --> (2) Oxidized plastocyanin[l] + (2) Reduced ferredoxin[c]	(2) cpd12239[l] + (2) cpfdxo22[c] + (2) hvphoton1[c] --> (2) cpd12265[l] + (2) cpfdxr22[c]	0,10000	Photosynthesis
PSI_2	photosystem I (ferrocytochrome)		(slr1834 and slr1835 and ssl0563 and (slr0737 or smr0004) and sll0819 and sml0008 and (sll0629 or ssr0390) and slr1655 and smr0005 and (ssr2831 or Unknown_gene))	(2) Ferrocytochrome c6[l] + (2) Oxidized ferredoxin[c] + (2) Photosystem 1 photon[c] --> (2) Ferricytochrome c6[l] + (2) Reduced ferredoxin[c]	(2) focytc_6[l] + (2) cpfdxo22[c] + (2) hvphoton1[c] --> (2) ficytc_6[l] + (2) cpfdxr22[c]	0,10000	Photosynthesis
SUCDpp_syn	succinate dehydrogenase (periplasm)	1.3.99.1	sll0823 and sll1625 and slr1233	(1) Plastoquinone 9[p] + (1) Succinate[c] --> (1) Fumarate[c] + (1) Plastoquinol-9[p]	(1) cpd07274[p] + (1) cpd00036[c] --> (1) cpd00106[c] + (1) cpd16503[p]	0,10000	Photosynthesis
CBFC2	cytochrome b6/f complex	1.10.9.1	sll1317 and slr0342 and sll1182 and sll1316 and slr1185 and slr0343 and smr0010 and ssl3803 and smr0003 and sml0004 and (sll1579 or sll1580) and slr1878 and sll1051 and sll1471 and slr2051 and slr1986 and (ssr3383 or ssl3093) and (sll0928 or slr2067) and (sll0199 or Unknown_gene) and (sll1578 or Unknown_gene) and (sll1577 or Unknown_gene) and (slr0335 or Unknown_gene) and (slr1459 or Unknown_gene)	(2) H+[c] + (2) Ferricytochrome c6[l] + (1) Plastoquinol-9[l] --> (4) H+[l] + (2) Ferrocytochrome c6[l] + (1) Plastoquinone 9[l]	(2) cpd00067[c] + (2) ficytc_6[l] + (1) cpd16503[l] --> (4) cpd00067[l] + (2) focytc_6[l] + (1) cpd07274[l]	0,10000	Photosynthesis
CBFCu	cytochrome b6/f complex	1.10.9.1	sll1317 and slr0342 and sll1182 and sll1316 and slr1185 and slr0343 and smr0010 and ssl3803 and smr0003 and sml0004 and (sll1579 or sll1580) and slr1878 and sll1051 and sll1471 and slr2051 and slr1986 and (ssr3383 or ssl3093)and (sll0928 or slr2067) and (sll0199 or Unknown_gene) and (sll1578 or Unknown_gene) and (sll1577 or Unknown_gene) and (slr0335 or Unknown_gene) and (slr1459 or Unknown_gene)	(2) H+[c] + (1) Plastoquinol-9[l] + (2) Oxidized plastocyanin[l] --> (4) H+[l] + (1) Plastoquinone 9[l] + (2) Reduced plastocyanin[l]	(2) cpd00067[c] + (1) cpd16503[l] + (2) cpd12265[l] --> (4) cpd00067[l] + (1) cpd07274[l] + (2) cpd12239[l]	0,10000	Photosynthesis
FQR	Cyclic Electron Flow	1.18.1.2	ssr2016	(2) H+[c] + (1) Plastoquinone 9[l] + (2) Reduced ferredoxin[c] --> (1) Plastoquinol-9[l] + (2) Oxidized ferredoxin[c]	(2) cpd00067[c] + (1) cpd07274[l] + (2) cpfdxr22[c] --> (1) cpd16503[l] + (2) cpfdxo22[c]	0,10000	Photosynthesis
rxnPhosphoketolase	phosphoketolase	4.1.2.22	slr0453	(1) D-fructose-6-phosphate[c] + (1) Phosphate[c] --> (1) D-Erythrose4-phosphate[c] + (1) Acetylphosphate[c] + (1) H2O[c]	(1) cpd00072[c] + (1) cpd00009[c] --> (1) cpd00236[c] + (1) cpd00196[c] + (1) cpd00001[c]	0,10000	phosphoketolase pathway	[2]
rxnPhosphoketolase2	phosphoketolase	4.1.2.22	slr0453	(1) D-Xylulose5-phosphate[c] + (1) Phosphate[c] --> (1) Glyceraldehyde3-phosphate[c] + (1) Acetylphosphate[c] + (1) H2O[c]	(1) cpd00198[c] + (1) cpd00009[c] --> (1) cpd00102[c] + (1) cpd00196[c] + (1) cpd00001[c]	0,10000	phosphoketolase pathway	[2]
rxn00493	L-Phenylalanine:2-oxoglutarate aminotransferase	2.6.1.58	(sll0402 or sll0480 or slr0036 or sll1713 or sll1958)	(1) 2-Oxoglutarate[c] + (1) L-Phenylalanine[c] <=> (1) L-Glutamate[c] + (1) Phenylpyruvate[c]	(1) cpd00024[c] + (1) cpd00066[c] <=> (1) cpd00023[c] + (1) cpd00143[c]	-10000,10000	Phenylalanine,tyrosine and tryptophan biosynthesis, Phenylalanine metabolism
rxn00726	Chorismate pyruvate-lyase (amino-accepting)	4.1.3.27	((slr0738 or slr1979) and slr0055)	(1) NH3[c] + (1) Chorismate[c] --> (1) H2O[c] + (1) Pyruvate[c] + (1) H+[c] + (1) Anthranilate[c]	(1) cpd00013[c] + (1) cpd00216[c] --> (1) cpd00001[c] + (1) cpd00020[c] + (1) cpd00067[c] + (1) cpd00093[c]	0,10000	Phenylalanine,tyrosine and tryptophan biosynthesis
rxn00727	Chorismate pyruvate-lyase (amino-accepting)	4.1.3.27	((slr0738 or slr1979) and slr0055)	(1) L-Glutamine[c] + (1) Chorismate[c] --> (1) Pyruvate[c] + (1) L-Glutamate[c] + (1) H+[c] + (1) Anthranilate[c]	(1) cpd00053[c] + (1) cpd00216[c] --> (1) cpd00020[c] + (1) cpd00023[c] + (1) cpd00067[c] + (1) cpd00093[c]	0,10000	Phenylalanine,tyrosine and tryptophan biosynthesis
rxn02213	3-Dehydroquinate hydro-lyase	4.2.1.10	(sll1112 or slr0752)	(1) 5-Dehydroquinate[c] --> (1) H2O[c] + (1) 3-Dehydroshikimate[c]	(1) cpd00699[c] --> (1) cpd00001[c] + (1) cpd01716[c]	0,10000	Phenylalanine,tyrosine and tryptophan biosynthesis
rxn01256	Chorismate pyruvatemutase	5.4.99.5	sll0109	(1) Chorismate[c] --> (1) Prephenate[c]	(1) cpd00216[c] --> (1) cpd00219[c]	0,10000	Phenylalanine,tyrosine and tryptophan biosynthesis
rxn02508	N-(5-Phospho-beta-D-ribosyl)anthranilate ketol-isomerase	5.3.1.24	sll0356	(1) N-5-phosphoribosyl-anthranilate[c] --> (1) 1-(2-carboxyphenylamino)-1-deoxyribulose 5-phosphate[c]	(1) cpd02642[c] --> (1) cpd00956[c]	0,10000	Phenylalanine,tyrosine and tryptophan biosynthesis
rxn01332	Phosphoenolpyruvate:D-erythrose-4-phosphate	4.1.2.15	sll0934	(1) H2O[c] + (1) Phosphoenolpyruvate[c] + (1) D-Erythrose4-phosphate[c] --> (1) Phosphate[c] + (1) H+[c] + (1) DAHP[c]	(1) cpd00001[c] + (1) cpd00061[c] + (1) cpd00236[c] --> (1) cpd00009[c] + (1) cpd00067[c] + (1) cpd02857[c]	0,10000	Phenylalanine,tyrosine and tryptophan biosynthesis
rxn01000	Prephenate hydro-lyase (decarboxylating)	4.2.1.51	sll1662	(1) H+[c] + (1) Prephenate[c] --> (1) H2O[c] + (1) CO2[c] + (1) Phenylpyruvate[c]	(1) cpd00067[c] + (1) cpd00219[c] --> (1) cpd00001[c] + (1) cpd00011[c] + (1) cpd00143[c]	0,10000	Phenylalanine,tyrosine and tryptophan biosynthesis
rxn01739	ATP:shikimate 3-phosphotransferase	2.7.1.71	sll1669	(1) ATP[c] + (1) Shikimate[c] --> (1) ADP[c] + (1) Shikimate 3-phosphate[c]	(1) cpd00002[c] + (1) cpd00383[c] --> (1) cpd00008[c] + (1) cpd02030[c]	0,10000	Phenylalanine,tyrosine and tryptophan biosynthesis
rxn01255	5-O-(1-Carboxyvinyl)-3-phosphoshikimate phosphate-lyase	4.2.3.5	sll1747	(1) 5-O--1-Carboxyvinyl-3-phosphoshikimate[c] --> (1) Phosphate[c] + (1) H+[c] + (1) Chorismate[c]	(1) cpd00932[c] --> (1) cpd00009[c] + (1) cpd00067[c] + (1) cpd00216[c]	0,10000	Phenylalanine,tyrosine and tryptophan biosynthesis
rxn02476	Phosphoenolpyruvate:3-phosphoshikimate	2.5.1.19	slr0444	(1) Phosphoenolpyruvate[c] + (1) Shikimate 3-phosphate[c] --> (1) Phosphate[c] + (1) H+[c] + (1) 5-O--1-Carboxyvinyl-3-phosphoshikimate[c]	(1) cpd00061[c] + (1) cpd02030[c] --> (1) cpd00009[c] + (1) cpd00067[c] + (1) cpd00932[c]	0,10000	Phenylalanine,tyrosine and tryptophan biosynthesis
rxn02507	1-(2-Carboxyphenylamino)-1-deoxy-D-ribulose-5-phosphate	4.1.1.48	slr0546	(1) H+[c] + (1) 1-(2-carboxyphenylamino)-1-deoxyribulose 5-phosphate[c] --> (1) H2O[c] + (1) CO2[c] + (1) Indoleglycerol phosphate[c]	(1) cpd00067[c] + (1) cpd00956[c] --> (1) cpd00001[c] + (1) cpd00011[c] + (1) cpd02210[c]	0,10000	Phenylalanine,tyrosine and tryptophan biosynthesis
rxn00474	L-Serine hydro-lyase (adding indoleglycerol-phosphate)	4.2.1.20	slr0966 and slr0543	(1) L-Serine[c] + (1) Indole[c] --> (1) H2O[c] + (1) L-Tryptophan[c]	(1) cpd00054[c] + (1) cpd00359[c] --> (1) cpd00001[c] + (1) cpd00065[c]	0,10000	Phenylalanine,tyrosine and tryptophan biosynthesis
rxn01964	L-Serine hydro-lyase (adding indoleglycerol-phosphate)	4.2.1.20	slr0966 and slr0543	(1) L-Serine[c] + (1) Indoleglycerol phosphate[c] --> (1) H2O[c] + (1) L-Tryptophan[c] + (1) Glyceraldehyde3-phosphate[c]	(1) cpd00054[c] + (1) cpd02210[c] --> (1) cpd00001[c] + (1) cpd00065[c] + (1) cpd00102[c]	0,10000	Phenylalanine,tyrosine and tryptophan biosynthesis
rxn01740	Shikimate:NADP+ 5-oxidoreductase	1.1.1.25	slr1559	(1) NADPH[c] + (1) H+[c] + (1) 3-Dehydroshikimate[c] --> (1) NADP[c] + (1) Shikimate[c]	(1) cpd00005[c] + (1) cpd00067[c] + (1) cpd01716[c] --> (1) cpd00006[c] + (1) cpd00383[c]	0,10000	Phenylalanine,tyrosine and tryptophan biosynthesis
rxn00791	N-(5-Phospho-D-ribosyl)anthranilate:pyrophosphate	2.4.2.18	slr1867	(1) Anthranilate[c] + (1) PRPP[c] --> (1) PPi[c] + (1) N-5-phosphoribosyl-anthranilate[c]	(1) cpd00093[c] + (1) cpd00103[c] --> (1) cpd00012[c] + (1) cpd02642[c]	0,10000	Phenylalanine,tyrosine and tryptophan biosynthesis
rxn00525	L-arogenate:NAD+ oxidoreductase	1.3.1.43	slr2081	(1) NAD[c] + (1) Pretyrosine[c] --> (1) NADH[c] + (1) CO2[c] + (1) L-Tyrosine[c]	(1) cpd00003[c] + (1) cpd00616[c] --> (1) cpd00004[c] + (1) cpd00011[c] + (1) cpd00069[c]	0,10000	Phenylalanine,tyrosine and tryptophan biosynthesis
rxn00526	L-arogenate:NAD+ oxidoreductase	1.3.1.43	slr2081	(1) NADP[c] + (1) Pretyrosine[c] --> (1) NADPH[c] + (1) CO2[c] + (1) L-Tyrosine[c]	(1) cpd00006[c] + (1) cpd00616[c] --> (1) cpd00005[c] + (1) cpd00011[c] + (1) cpd00069[c]	0,10000	Phenylalanine,tyrosine and tryptophan biosynthesis
rxn01269	Prephenate:NADP+ oxidoreductase(decarboxylating)	1.3.1.43	slr2081	(1) NADP[c] + (1) Prephenate[c] --> (1) NADPH[c] + (1) CO2[c] + (1) p-hydroxyphenylpyruvate[c]	(1) cpd00006[c] + (1) cpd00219[c] --> (1) cpd00005[c] + (1) cpd00011[c] + (1) cpd00868[c]	0,10000	Phenylalanine,tyrosine and tryptophan biosynthesis
rxn02212	2-Dehydro-3-deoxy-D-arabino-heptonate 7-phosphate phosphate-lyase	4.2.3.4	slr2130	(1) DAHP[c] --> (1) Phosphate[c] + (1) H+[c] + (1) 5-Dehydroquinate[c]	(1) cpd02857[c] --> (1) cpd00009[c] + (1) cpd00067[c] + (1) cpd00699[c]	0,10000	Phenylalanine,tyrosine and tryptophan biosynthesis
rxn01741	Shikimate:NADP+ 5-oxidoreductase	1.1.1.25	slr1559	(1) NADP[c] + (1) Shikimate[c] <=> (1) NADPH[c] + (1) H+[c] + (1) 5-Dehydroshikimate[c]	(1) cpd00006[c] + (1) cpd00383[c] <=> (1) cpd00005[c] + (1) cpd00067[c] + (1) cpd01725[c]	-10000,10000	Phenylalanine,tyrosine and tryptophan biosynthesis
rxn01003	Phenylpyruvate carboxy-lyase	6.3.2.5	sll0250	(1) H+[c] + (1) Phenylpyruvate[c] --> (1) CO2[c] + (1) alpha-Tolualdehyde[c]	(1) cpd00067[c] + (1) cpd00143[c] --> (1) cpd00011[c] + (1) cpd00464[c]	0,10000	Phenylalanine metabolism
rxn01842	Phenylacetate:CoA ligase	6.2.1.30	sll8012	(1) ATP[c] + (1) CoA[c] + (1) Phenyl acetate[c] --> (1) PPi[c] + (1) AMP[c] + (1) Phenylacetyl-CoA[c]	(1) cpd00002[c] + (1) cpd00010[c] + (1) cpd00430[c] --> (1) cpd00012[c] + (1) cpd00018[c] + (1) cpd00452[c]	0,10000	Phenylalanine metabolism
rxn00999	Phenylpyruvate:oxygen oxidoreductase (hydroxylating,decarboxylating)	1.13.11.27	slr0090	(1) O2[c] + (1) Phenylpyruvate[c] --> (1) CO2[c] + (1) 2-Hydroxyphenylacetate[c]	(1) cpd00007[c] + (1) cpd00143[c] --> (1) cpd00011[c] + (1) cpd03480[c]	0,10000	Phenylalanine metabolism
rxn01840	Phenylacetaldehyde:NAD+ oxidoreductase	1.2.1.5 and 1.2.1.39	slr0091	(1) H2O[c] + (1) NAD[c] + (1) alpha-Tolualdehyde[c] <=> (1) NADH[c] + (1) H+[c] + (1) Phenyl acetate[c]	(1) cpd00001[c] + (1) cpd00003[c] + (1) cpd00464[c] <=> (1) cpd00004[c] + (1) cpd00067[c] + (1) cpd00430[c]	-10000,10000	Phenylalanine metabolism
rxn10562	indolepyruvate ferredoxin oxidoreductase (phenylpyvurate)	Undetermined		(1) CoA[c] + (1) Phenylpyruvate[c] + (2) Oxidized ferredoxin[c] <=> (1) CO2[c] + (1) H+[c] + (1) Phenylacetyl-CoA[c] + (2) Reduced ferredoxin[c]	(1) cpd00010[c] + (1) cpd00143[c] + (2) cpfdxo22[c] <=> (1) cpd00011[c] + (1) cpd00067[c] + (1) cpd00452[c] + (2) cpfdxr22[c]	-10000,10000	Phenylalanine metabolism
PPTGS_Syn	Peptidoglycan subunit synthesis Synechocystis sp. PCC6803		sll1833	(1) Undecaprenyl-diphospho-N-acetylmuramoyl--N-acetylglucosamine-L-ala-D-glu-meso-2-6-diaminopimeloyl-D-ala-D-ala[c] --> (1) Peptidoglycan subunit of Synechocystis sp. PCC8603[c] + (1) Bactoprenyl diphosphate[c]	(1) cpd03495[c] --> (1) peptido_syn[c] + (1) cpd02229[c]	0,10000	Peptidoglycan biosynthesis
PPTGF_Syn	Flypase		slr0488	(1) Peptidoglycan subunit of Synechocystis sp. PCC8603[c] --> (1) Peptidoglycan subunit of Synechocystis sp. PCC8603[p]	(1) peptido_syn[c] --> (1) peptido_syn[p]	0,10000	Peptidoglycan biosynthesis
rxn00701	UDPglucose--hexose-1-phosphate uridylyltransferase	2.7.7.12		(1) D-Galactose 1-phosphate[c] + (1) UDP-glucose[c] <=> (1) UDP-galactose[c] + (1) D-Glucose 1-phosphate[c]	(1) cpd00348[c] + (1) cpd00026[c] <=> (1) cpd00043[c] + (1) cpd00089[c]	-10000,10000	Peptidoglycan biosynthesis
rxn03904	UDPMurAc(oyl-L-Ala-D-gamma-Glu-L-Lys-D-Ala-D-Ala):undecaprenyl-	2.7.8.13	sll0657	(1) Undecaprenyl phosphate[c] + (1) UDP-N-acetylmuramoyl-L-alanyl-D-glutamyl-6-carboxy-L-lysyl-D-alanyl- D-alanine[c] --> (1) UMP[c] + (1) Undecaprenyl-diphospho-N-acetylmuramoyl-L-alanyl-D-glutamyl-meso-2-6-diaminopimeloyl-D-alanyl-D-alanine[c]	(1) cpd00286[c] + (1) cpd02968[c] --> (1) cpd00091[c] + (1) cpd03494[c]	0,10000	Peptidoglycan biosynthesis
rxn03901	Undecaprenyl-diphosphate phosphohydrolase	3.6.1.27	sll0210	(1) H2O[c] + (1) Bactoprenyl diphosphate[c] --> (1) Phosphate[c] + (1) H+[c] + (1) Undecaprenyl phosphate[c]	(1) cpd00001[c] + (1) cpd02229[c] --> (1) cpd00009[c] + (1) cpd00067[c] + (1) cpd00286[c]	0,10000	Peptidoglycan biosynthesis
rxn03140	UDP-N-acetylmuramoyl-L-alanyl-D-glutamyl-L-lysine:alanyl-D-alanine	6.3.2.10	slr1351	(1) ATP[c] + (1) D-Alanyl-D-alanine[c] + (1) UDP-N-acetylmuramoyl-L-alanyl-D-glutamyl-L-lysine[c] --> (1) ADP[c] + (1) Phosphate[c] + (1) H+[c] + (1) UDP-N-acetylmuramoyl-L-alanyl-D-glutamyl-L-lysyl-D-alanyl-D-alanine[c]	(1) cpd00002[c] + (1) cpd00731[c] + (1) cpd02861[c] --> (1) cpd00008[c] + (1) cpd00009[c] + (1) cpd00067[c] + (1) cpd02943[c]	0,10000	Peptidoglycan biosynthesis
rxn03141	UDP-N-acetylmuramoyl-L-alanyl-D-glutamyl-L-lysine:alanyl-D-alanine	6.3.2.10	slr1351	(1) ATP[c] + (1) D-Alanyl-D-alanine[c] + (1) UDP-N-acetylmuramoyl-L-alanyl-gamma-D-glutamyl-L-lysine[c] --> (1) ADP[c] + (1) Phosphate[c] + (1) H+[c] + (1) UDPMurAc(oyl-L-Ala-D-gamma-Glu-L-Lys-D-Ala-D-Ala)[c]	(1) cpd00002[c] + (1) cpd00731[c] + (1) cpd03490[c] --> (1) cpd00008[c] + (1) cpd00009[c] + (1) cpd00067[c] + (1) cpd02862[c]	0,10000	Peptidoglycan biosynthesis
rxn03408	UDP-N-acetylglucosamine-N-acetylmuramyl-(pentapeptide)pyrophosphoryl-undecaprenol N-acetylglucosamine transferase	2.4.1.227	slr1656	(1) UDP-N-acetylglucosamine[c] + (1) Undecaprenyl-diphospho-N-acetylmuramoyl-L-alanyl-D-glutamyl-meso-2-6-diaminopimeloyl-D-alanyl-D-alanine[c] --> (1) UDP[c] + (1) Undecaprenyl-diphospho-N-acetylmuramoyl--N-acetylglucosamine-L-ala-D-glu-meso-2-6-diaminopimeloyl-D-ala-D-ala[c]	(1) cpd00037[c] + (1) cpd03494[c] --> (1) cpd00014[c] + (1) cpd03495[c]	0,10000	Peptidoglycan biosynthesis
rxn08892	murein D,D-carboxypeptidase (murein5p5p) (periplasm)	3.4.16.4	sll0777 and slr0646 and slr0804 and slr1924	(1) H2O[c] + (1) two linked disacharide pentapeptide murein units (uncrosslinked, middle of chain)[c] <=> (1) D-Alanine[c] + (1) two linked disacharide pentapeptide and tetrapeptide murein units (uncrosslinked, middle of chain)[c]	(1) cpd00001[c] + (1) cpd15511[c] <=> (1) cpd00117[c] + (1) cpd15510[c]	-10000,10000	Peptidoglycan biosynthesis
rxn08893	murein D,D-carboxypeptidase (murein5p4p) (periplasm)	3.4.16.4	sll0777 and slr0646 and slr0804 and slr1924	(1) H2O[c] + (1) two linked disacharide pentapeptide and tetrapeptide murein units (uncrosslinked, middle of chain)[c] <=> (1) D-Alanine[c] + (1) two linked disacharide tetrapeptide murein units (uncrosslinked, middle of chain)[c]	(1) cpd00001[c] + (1) cpd15510[c] <=> (1) cpd00117[c] + (1) cpd15505[c]	-10000,10000	Peptidoglycan biosynthesis
rxn08894	murein D,D-carboxypeptidase (murein5p3p) (periplasm)	3.4.16.4	sll0777 and slr0646 and slr0804 and slr1924	(1) H2O[c] + (1) two linked disacharide pentapeptide and tripeptide murein units (uncrosslinked, middle of chain)[c] <=> (1) D-Alanine[c] + (1) two linked disacharide tetrapeptide and tripeptide murein units (uncrosslinked, middle of chain)[c]	(1) cpd00001[c] + (1) cpd15509[c] <=> (1) cpd00117[c] + (1) cpd15504[c]	-10000,10000	Peptidoglycan biosynthesis
rxn08927	murein L,D-carboxypeptidase (murein4p4p) (periplasm)	3.4.17.13	slr1534	(1) H2O[c] + (1) two linked disacharide tetrapeptide murein units (uncrosslinked, middle of chain)[c] <=> (1) D-Alanine[c] + (1) two linked disacharide tetrapeptide and tripeptide murein units (uncrosslinked, middle of chain)[c]	(1) cpd00001[c] + (1) cpd15505[c] <=> (1) cpd00117[c] + (1) cpd15504[c]	-10000,10000	Peptidoglycan biosynthesis
rxn03405	UDP-N-acetylglucosamine-N-acetylmuramyl-(pentapeptide)pyrophosphoryl-undecaprenol N-acetylglucosamine transferase	2.4.1.227	slr1656	(1) UDP-N-acetylglucosamine[c] + (1) N-acetylmuramoyl-L-alanyl-D-glutamyl-L-lysyl-D-alanyl-D-alanine-diphosphoundecaprenol[c] <=> (1) UDP[c] + (1) Undecaprenyl-diphospho-N-acetylmuramoyl-(N-acetylglucosamine)-L-alanyl-D-glutamyl-L-lysyl-D-alanyl-D-alanine[c]	(1) cpd00037[c] + (1) cpd03486[c] <=> (1) cpd00014[c] + (1) cpd03487[c]	-10000,10000	Peptidoglycan biosynthesis
rxn03933	UDP-N-acetylglucosamine-N-acetylmuramyl-(pentapeptide)pyrophosphoryl-undecaprenol N-acetylglucosamine transferase	2.4.1.227	slr1656	(1) UDP-N-acetylglucosamine[c] + (1) MurAc(oyl-L-Ala-D-gamma-Glu-L-Lys-D-Ala-D-Ala)-diphospho- undecaprenol[c] <=> (1) UDP[c] + (1) Undecaprenyl-diphospho-N-acetylmuramoyl-(N-acetylglucosamine)-L-alanyl-gamma-D-glutamyl-L-lysyl-D-alanyl-D-alanine[c]	(1) cpd00037[c] + (1) cpd02948[c] <=> (1) cpd00014[c] + (1) cpd03491[c]	-10000,10000	Peptidoglycan biosynthesis
rxn00770	ATP:D-ribose-5-phosphate pyrophosphotransferase	2.7.6.1	sll0469	(1) ATP[c] + (1) ribose-5-phosphate[c] <=> (1) AMP[c] + (1) PRPP[c]	(1) cpd00002[c] + (1) cpd00101[c] <=> (1) cpd00018[c] + (1) cpd00103[c]	-10000,10000	Pentose phosphate pathway, Purine metabolism
rxn00778	D-Ribose 1,5-phosphomutase	5.4.2.7	sll1758	(1) Ribose 1-phosphate[c] <=> (1) ribose-5-phosphate[c]	(1) cpd00475[c] <=> (1) cpd00101[c]	-10000,10000	Pentose phosphate pathway, Purine metabolism
rxn00604	D-Glucose-6-phosphate:NADP+ 1-oxoreductase	1.1.1.49	slr1843	(1) NADP[c] + (1) D-glucose-6-phosphate[c] --> (1) NADPH[c] + (1) H+[c] + (1) 6-phospho-D-glucono-1-5-lactone[c]	(1) cpd00006[c] + (1) cpd00079[c] --> (1) cpd00005[c] + (1) cpd00067[c] + (1) cpd00911[c]	0,10000	Pentose phosphate pathway, Glycolysis / Gluconeogenesis
rxn00545	ATP:D-fructose-6-phosphate 1-phosphotransferase	2.7.1.11	(sll0745 or sll1196)	(1) ATP[c] + (1) D-fructose-6-phosphate[c] --> (1) ADP[c] + (1) D-fructose-1,6-bisphosphate[c]	(1) cpd00002[c] + (1) cpd00072[c] --> (1) cpd00008[c] + (1) cpd00290[c]	0,10000	Pentose phosphate pathway, Fructose and mannose metabolism, Glycolysis / Gluconeogenesis
rxn01476	6-Phospho-D-glucono-1,5-lactone lactonohydrolase	3.1.1.31	sll1479	(1) H2O[c] + (1) 6-phospho-D-glucono-1-5-lactone[c] --> (1) H+[c] + (1) 6-Phospho-D-gluconate[c]	(1) cpd00001[c] + (1) cpd00911[c] --> (1) cpd00067[c] + (1) cpd00284[c]	0,10000	Pentose phosphate pathway
rxn00784	2-Deoxy-D-ribose-5-phosphate acetaldehyde-lyase	4.1.2.4	sll1776	(1) deoxyribose-5-phosphate[c] --> (1) Acetaldehyde[c] + (1) Glyceraldehyde3-phosphate[c]	(1) cpd00510[c] --> (1) cpd00071[c] + (1) cpd00102[c]	0,10000	Pentose phosphate pathway
rxn00772	ribokinase	2.7.1.15		(1) ATP[c] + (1) D-Ribose[c] --> (1) ADP[c] + (1) ribose-5-phosphate[c]	(1) cpd00002[c] + (1) cpd00105[c] --> (1) cpd00008[c] + (1) cpd00101[c]	0,10000	Pentose phosphate pathway
rxn01987	Deoxyribokinase	2.7.1.15		(1) ATP[c] + (1) Deoxyribose[c] --> (1) ADP[c] + (1) deoxyribose-5-phosphate[c]	(1) cpd00002[c] + (1) cpd01242[c] --> (1) cpd00008[c] + (1) cpd00510[c]	0,10000	Pentose phosphate pathway
rxn01108	beta-D-Glucose:NAD+ 1-oxoreductase	1.1.1.47	sll1709	(1) NAD[c] + (1) beta-D-Glucose[c] <=> (1) NADH[c] + (1) H+[c] + (1) Gluconolactone[c]	(1) cpd00003[c] + (1) cpd00190[c] <=> (1) cpd00004[c] + (1) cpd00067[c] + (1) cpd00170[c]	-10000,10000	Pentose phosphate pathway
rxn01333	Sedoheptulose-7-phosphate:D-glyceraldehyde-3-phosphate	2.2.1.2	slr1793	(1) Glyceraldehyde3-phosphate[c] + (1) Sedoheptulose7-phosphate[c] <=> (1) D-fructose-6-phosphate[c] + (1) D-Erythrose4-phosphate[c]	(1) cpd00102[c] + (1) cpd00238[c] <=> (1) cpd00072[c] + (1) cpd00236[c]	-10000,10000	Pentose phosphate pathway
rxn04950	xylitol:oxygen oxidoreductase	1.1.3.41	slr0806	(1) O2[c] + (1) Xylitol[c] --> (1) H2O2[c] + (1) Xylose[c]	(1) cpd00007[c] + (1) cpd00306[c] --> (1) cpd00025[c] + (1) cpd00154[c]	0,10000	Pentose and glucuronate interconversions
rxn01043	Xylitol:NADP+ oxidoreductase	1.1.1.21	slr0942	(1) NADP[c] + (1) Xylitol[c] <=> (1) NADPH[c] + (1) H+[c] + (1) Xylose[c]	(1) cpd00006[c] + (1) cpd00306[c] <=> (1) cpd00005[c] + (1) cpd00067[c] + (1) cpd00154[c]	-10000,10000	Pentose and glucuronate interconversions
rxn00903	L-Valine:2-oxoglutarate aminotransferase	2.6.1.42	slr0032	(1) 2-Oxoglutarate[c] + (1) L-Valine[c] <=> (1) L-Glutamate[c] + (1) 3-Methyl-2-oxobutanoate[c]	(1) cpd00024[c] + (1) cpd00156[c] <=> (1) cpd00023[c] + (1) cpd00123[c]	-10000,10000	Pantothenate and CoA biosynthesis, Valine,leucine and isoleucine degradation, Valine,leucine and isoleucine biosynthesis
rxn00898	2,3-Dihydroxy-3-methylbutanoate hydro-lyase	4.2.1.9	slr0452	(1) 2,3-Dihydroxy-isovalerate[c] --> (1) H2O[c] + (1) 3-Methyl-2-oxobutanoate[c]	(1) cpd02498[c] --> (1) cpd00001[c] + (1) cpd00123[c]	0,10000	Pantothenate and CoA biosynthesis, Valine,leucine and isoleucine biosynthesis
rxn00003	2-Acetolactate pyruvate-lyase (carboxylating)	2.2.1.6	(sll1981 and slr2088 and sll0065)	(2) Pyruvate[c] + (1) H+[c] --> (1) CO2[c] + (1) 2-Acetolactate[c]	(2) cpd00020[c] + (1) cpd00067[c] --> (1) cpd00011[c] + (1) cpd00668[c]	0,10000	Pantothenate and CoA biosynthesis, C5-Branched dibasic acid metabolism
rxn01791	(R)-Pantoate:beta-alanine ligase (AMP-forming)	6.3.2.1	sll1249	(1) ATP[c] + (1) beta-Alanine[c] + (1) Pantoate[c] --> (1) PPi[c] + (1) AMP[c] + (1) Pantothenate[c]	(1) cpd00002[c] + (1) cpd00085[c] + (1) cpd00408[c] --> (1) cpd00012[c] + (1) cpd00018[c] + (1) cpd00644[c]	0,10000	Pantothenate and CoA biosynthesis, beta-Alanine metabolism
PPNCL	phosphopantothenate-cysteine ligase	6.3.2.5	sll0250	(1) CTP[c] + (1) L-Cysteine[c] + (1) 4-phosphopantothenate[c] --> (1) H+[c] + (1) Phosphate[c] + (1) CDP[c] + (1) (R)-4'-Phosphopantothenoyl-L-cysteine[c]	(1) cpd00052[c] + (1) cpd00084[c] + (1) cpd02201[c] --> (1) cpd00067[c] + (1) cpd00009[c] + (1) cpd00096[c] + (1) cpd02666[c]	0,10000	Pantothenate and CoA biosynthesis
rxn02341	N-[(R)-4'-Phosphopantothenoyl]-L-cysteine carboxy-lyase	4.1.1.36	sll0250	(1) H+[c] + (1) (R)-4'-Phosphopantothenoyl-L-cysteine[c] --> (1) CO2[c] + (1) Phosphopantetheine[c]	(1) cpd00067[c] + (1) cpd02666[c] --> (1) cpd00011[c] + (1) cpd00834[c]	0,10000	Pantothenate and CoA biosynthesis
rxn02186	2,3-Dihydroxy-3-methylbutanoate:NADP+ oxidoreductase (isomerizing)	1.1.1.86	sll1363	(1) NADPH[c] + (1) H+[c] + (1) 2-Acetolactate[c] --> (1) NADP[c] + (1) 2,3-Dihydroxy-isovalerate[c]	(1) cpd00005[c] + (1) cpd00067[c] + (1) cpd00668[c] --> (1) cpd00006[c] + (1) cpd02498[c]	0,10000	Pantothenate and CoA biosynthesis
rxn00912	5,10-Methylenetetrahydrofolate:3-methyl-2-oxobutanoate	2.1.2.11	slr0526	(1) H2O[c] + (1) 3-Methyl-2-oxobutanoate[c] + (1) 5-10-Methylenetetrahydrofolate[c] --> (1) Tetrahydrofolate[c] + (1) 2-Dehydropantoate[c]	(1) cpd00001[c] + (1) cpd00123[c] + (1) cpd00125[c] --> (1) cpd00087[c] + (1) cpd00712[c]	0,10000	Pantothenate and CoA biosynthesis
rxn00100	ATP:dephospho-CoA 3'-phosphotransferase	2.7.1.24	slr0553	(1) ATP[c] + (1) Dephospho-CoA[c] --> (1) ADP[c] + (1) CoA[c]	(1) cpd00002[c] + (1) cpd00655[c] --> (1) cpd00008[c] + (1) cpd00010[c]	0,10000	Pantothenate and CoA biosynthesis
rxn12510	pantothenate kinase	2.7.1.33	slr0812	(1) ATP[c] + (1) Pantothenate[c] --> (1) ADP[c] + (1) 4-phosphopantothenate[c]	(1) cpd00002[c] + (1) cpd00644[c] --> (1) cpd00008[c] + (1) cpd02201[c]	0,10000	Pantothenate and CoA biosynthesis
rxn01790	2-dehydropantoate 2-reductase	1.1.1.169		(1) H+[c] + (1) NADPH[c] + (1) 2-Dehydropantoate[c] --> (1) NADP[c] + (1) Pantoate[c]	(1) cpd00067[c] + (1) cpd00005[c] + (1) cpd00712[c] --> (1) cpd00006[c] + (1) cpd00408[c]	0,10000	Pantothenate and CoA biosynthesis
rxn09532	acyl carrier protein synthase, mitochondrial	Undetermined		(1) H2O[c] + (1) CoA[c] --> (1) Adenosine 3-5-bisphosphate[c] + (1) Phosphopantetheine[c]	(1) cpd00001[c] + (1) cpd00010[c] --> (1) cpd00045[c] + (1) cpd00834[c]	0,10000	Pantothenate and CoA biosynthesis
rxn02175	ATP:pantetheine-4'-phosphate adenylyltransferase	2.7.7.3	slr0847	(1) ATP[c] + (1) Phosphopantetheine[c] <=> (1) PPi[c] + (1) Dephospho-CoA[c]	(1) cpd00002[c] + (1) cpd00834[c] <=> (1) cpd00012[c] + (1) cpd00655[c]	-10000,10000	Pantothenate and CoA biosynthesis
NDH1_1p	NAD(P)H dehydrogenase (plastoquinone-8 & 3 protons) (periplasm)	1.6.5.3	( (slr0331 or slr1291) and slr0844 and sll0519 and sll0223 and slr1279 and sll0522 and sll0521 and slr0261 and sll0520 and slr1281 and (slr1280 or sll8031) and slr1623 and sll1262 and sll1220 and sll1221 and sll1223 )	(4) H+[c] + (1) NADPH[c] + (1) Plastoquinone 9[p] --> (1) NADP[c] + (3) H+[p] + (1) Plastoquinol-9[p]	(4) cpd00067[c] + (1) cpd00005[c] + (1) cpd07274[p] --> (1) cpd00006[c] + (3) cpd00067[p] + (1) cpd16503[p]	0,10000	Oxidative Phosphorylation
NDH1_1u	NAD(P)H dehydrogenase (plastoquinone-8 & 3 protons) (tilacoide)	1.6.5.3	( (slr0331 or slr1291) and slr0844 and sll0519 and sll0223 and slr1279 and sll0522 and sll0521 and slr0261 and sll0520 and slr1281 and (slr1280 or sll8031) and slr1623 and sll1262 and sll1220 and sll1221 and sll1223 )	(4) H+[c] + (1) NADPH[c] + (1) Plastoquinone 9[l] --> (1) NADP[c] + (3) H+[l] + (1) Plastoquinol-9[l]	(4) cpd00067[c] + (1) cpd00005[c] + (1) cpd07274[l] --> (1) cpd00006[c] + (3) cpd00067[l] + (1) cpd16503[l]	0,10000	Oxidative Phosphorylation
NDH1_2p	NAD(P)H dehydrogenase (plastoquinone-8 & 3 protons) (periplasm)	1.6.5.3	( (slr0331 or slr1291) and slr0844 and sll0519 and sll0223 and slr1279 and sll0522 and sll0521 and slr0261 and sll0520 and slr1281 and (slr1280 or sll8031) and slr1623 and sll1262 and sll1220 and sll1221 and sll1223 )	(4) H+[c] + (1) NADH[c] + (1) Plastoquinone 9[p] --> (1) NAD[c] + (3) H+[p] + (1) Plastoquinol-9[p]	(4) cpd00067[c] + (1) cpd00004[c] + (1) cpd07274[p] --> (1) cpd00003[c] + (3) cpd00067[p] + (1) cpd16503[p]	0,10000	Oxidative Phosphorylation
NDH1_2u	NAD(P)H dehydrogenase (plastoquinone-8 & 3 protons) (tilacoide)	1.6.5.3	( (slr0331 or slr1291) and slr0844 and sll0519 and sll0223 and slr1279 and sll0522 and sll0521 and slr0261 and sll0520 and slr1281 and (slr1280 or sll8031) and slr1623 and sll1262 and sll1220 and sll1221 and sll1223 )	(4) H+[c] + (1) NADH[c] + (1) Plastoquinone 9[l] --> (1) NAD[c] + (3) H+[l] + (1) Plastoquinol-9[l]	(4) cpd00067[c] + (1) cpd00004[c] + (1) cpd07274[l] --> (1) cpd00003[c] + (3) cpd00067[l] + (1) cpd16503[l]	0,10000	Oxidative Phosphorylation
ATP_syn_l	ATP synthetase(u)	3.6.3.14	(sll1322 and sll1323 and sll1324 and sll1326 and sll1325 and sll1327 and slr1329 and slr1330 and ssl2615 and sll1321)	(14) H+[l] + (3) ADP[c] + (3) Phosphate[c] --> (11) H+[c] + (3) ATP[c] + (3) H2O[c]	(14) cpd00067[l] + (3) cpd00008[c] + (3) cpd00009[c] --> (11) cpd00067[c] + (3) cpd00002[c] + (3) cpd00001[c]	0,10000	Oxidative Phosphorylation
ATP_syn_p	ATP synthase (four protons for one ATP) (periplasm)	3.6.3.14	(sll1322 and sll1323 and sll1324 and sll1326 and sll1325 and sll1327 and slr1329 and slr1330 and ssl2615 and sll1321)	(14) H+[p] + (3) ADP[c] + (3) Phosphate[c] --> (11) H+[c] + (3) ATP[c] + (3) H2O[c]	(14) cpd00067[p] + (3) cpd00008[c] + (3) cpd00009[c] --> (11) cpd00067[c] + (3) cpd00002[c] + (3) cpd00001[c]	0,10000	Oxidative Phosphorylation
NDH2_syn	NADH dehydrogenase 2 (plastoquinone-8) (tilacoide)	1.6.99.3	(slr0851 or slr1743 or sll1484)	(1) H+[c] + (1) NADH[c] + (1) Plastoquinone 9[l] --> (1) NAD[c] + (1) Plastoquinol-9[l]	(1) cpd00067[c] + (1) cpd00004[c] + (1) cpd07274[l] --> (1) cpd00003[c] + (1) cpd16503[l]	0,10000	Oxidative Phosphorylation
CYO1b2pp_syn	cytochrome c oxidase, synechocystis (2 protons periplasm)	1.9.3.1	(slr1137 or slr2082) and (sll0813 or slr1136) and (slr1138 or slr2083)	(4) H+[c] + (2) Reduced plastocyanin[p] + (0.5) O2[p] --> (2) H+[p] + (2) Oxidized plastocyanin[p] + (1) H2O[p]	(4) cpd00067[c] + (2) cpd12239[p] + (0.5) cpd00007[p] --> (2) cpd00067[p] + (2) cpd12265[p] + (1) cpd00001[p]	0,10000	Oxidative Phosphorylation
CYO1bpp_syn	cytochrome c oxidase, synechocystis (2 protons)	1.9.3.1	(slr1137 or slr2082) and (sll0813 or slr1136) and (slr1138 or slr2083)	(4) H+[c] + (2) Ferrocytochrome c6[p] + (0.5) O2[p] --> (2) H+[p] + (2) Ferricytochrome c6[p] + (1) H2O[p]	(4) cpd00067[c] + (2) focytc_6[p] + (0.5) cpd00007[p] --> (2) cpd00067[p] + (2) ficytc_6[p] + (1) cpd00001[p]	0,10000	Oxidative Phosphorylation
CYTBDpp	cytochrome oxidase bd (plastocianine-8: 2 protons) (periplasm)		(slr1379 and slr1380)	(1) Plastoquinol-9[p] + (0.5) O2[p] --> (1) Plastoquinone 9[p] + (1) H2O[p]	(1) cpd16503[p] + (0.5) cpd00007[p] --> (1) cpd07274[p] + (1) cpd00001[p]	0,10000	Oxidative Phosphorylation
SUCDu_syn	succinate dehydrogenase (thylakoid)	1.3.99.1	sll0823 and sll1625 and slr1233	(1) Plastoquinone 9[l] + (1) Succinate[c] --> (1) Fumarate[c] + (1) Plastoquinol-9[l]	(1) cpd07274[l] + (1) cpd00036[c] --> (1) cpd00106[c] + (1) cpd16503[l]	0,10000	Oxidative Phosphorylation
CBFC2pp	cytochrome b6/f complex periplasm	1.10.9.1	sll1317 and slr0342 and sll1182 and sll1316 and slr1185 and slr0343 and smr0010 and ssl3803 and smr0003 and sml0004 and (sll1579 or sll1580) and slr1878 and sll1051 and sll1471 and slr2051 and slr1986 and (ssr3383 or ssl3093) and (sll0928 or slr2067) and (sll0199 or Unknown_gene) and (sll1578 or Unknown_gene) and (sll1577 or Unknown_gene) and (slr0335 or Unknown_gene) and (slr1459 or Unknown_gene)	(2) H+[c] + (1) Plastoquinol-9[p] + (2) Ferricytochrome c6[p] --> (4) H+[p] + (1) Plastoquinone 9[p] + (2) Ferrocytochrome c6[p]	(2) cpd00067[c] + (1) cpd16503[p] + (2) ficytc_6[p] --> (4) cpd00067[p] + (1) cpd07274[p] + (2) focytc_6[p]	0,10000	Oxidative Phosphorylation
CBFCpp	cytochrome b6/f complex periplasm	1.10.9.1	sll1317 and slr0342 and sll1182 and sll1316 and slr1185 and slr0343 and smr0010 and ssl3803 and smr0003 and sml0004 and (sll1579 or sll1580) and slr1878 and sll1051 and sll1471 and slr2051 and slr1986 and (ssr3383 or ssl3093) and (sll0928 or slr2067) and (sll0199 or Unknown_gene) and (sll1578 or Unknown_gene) and (sll1577 or Unknown_gene) and (slr0335 or Unknown_gene) and (slr1459 or Unknown_gene)	(2) H+[c] + (2) Oxidized plastocyanin[p] + (1) Plastoquinol-9[p] --> (4) H+[p] + (2) Reduced plastocyanin[p] + (1) Plastoquinone 9[p]	(2) cpd00067[c] + (2) cpd12265[p] + (1) cpd16503[p] --> (4) cpd00067[p] + (2) cpd12239[p] + (1) cpd07274[p]	0,10000	Oxidative Phosphorylation
rxn12059	Plastoquinol:oxidized-plastocyanin oxidoreductase	1.10.9.1	slr1185 and sll1316	(2) Oxidized plastocyanin[c] + (1) Plastoquinol-9[c] <=> (1) Plastoquinone 9[c] + (2) Reduced plastocyanin[c]	(2) cpd12265[c] + (1) cpd16503[c] <=> (1) cpd07274[c] + (2) cpd12239[c]	-10000,10000	Oxidative Phosphorylation
FTR	ferredoxin:thioredoxin reductase	1.18.-.-	sll0554	(2) H+[c] + (2) Reduced ferredoxin[c] + (1) Oxidized thioredoxin[c] --> (2) Oxidized ferredoxin[c] + (1) Reduced thioredoxin[c]	(2) cpd00067[c] + (2) cpfdxr22[c] + (1) cpd11420[c] --> (2) cpfdxo22[c] + (1) cpd11421[c]	0,10000	Others
rxn01520	5,10-Methylenetetrahydrofolate:dUMP C-methyltransferase	2.1.1.148	sll1635	(1) 5-10-Methylenetetrahydrofolate[c] + (1) dUMP[c] --> (1) dTMP[c] + (1) Dihydrofolate[c]	(1) cpd00125[c] + (1) cpd00299[c] --> (1) cpd00298[c] + (1) cpd00330[c]	0,10000	One carbon pool by folate, Pyrimidine metabolism
rxn00692	5,10-Methylenetetrahydrofolate:glycine hydroxymethyltransferase	2.1.2.1	sll1931	(1) H2O[c] + (1) Glycine[c] + (1) 5-10-Methylenetetrahydrofolate[c] <=> (1) L-Serine[c] + (1) Tetrahydrofolate[c]	(1) cpd00001[c] + (1) cpd00033[c] + (1) cpd00125[c] <=> (1) cpd00054[c] + (1) cpd00087[c]	-10000,10000	One carbon pool by folate, Methane metabolism, Cyanoamino acid metabolism, Glycine,serine and threonine metabolism
rxn04954	5-methyltetrahydrofolate:NAD+ oxidoreductase	1.5.1.20		(1) NADH[c] + (1) H+[c] + (1) 5-10-Methylenetetrahydrofolate[c] --> (1) NAD[c] + (1) 5-Methyltetrahydrofolate[c]	(1) cpd00004[c] + (1) cpd00067[c] + (1) cpd00125[c] --> (1) cpd00003[c] + (1) cpd00345[c]	0,10000	One carbon pool by folate, Methane metabolism
rxn06600	glycine cleavage system	2.1.2.10	sll0171	(1) Tetrahydrofolate[c] + (1) S-Aminomethyldihydrolipoylprotein[c] --> (1) NH3[c] + (1) 5-10-Methylenetetrahydrofolate[c] + (1) Dihydrolipolprotein[c]	(1) cpd00087[c] + (1) cpd11830[c] --> (1) cpd00013[c] + (1) cpd00125[c] + (1) cpd12225[c]	0,10000	One carbon pool by folate
rxn01653	5-Formyltetrahydrofolate cyclo-ligase (ADP-forming)	6.3.3.2	sll1643	(1) ATP[c] + (1) 5-Formyltetrahydrofolate[c] --> (1) ADP[c] + (1) Phosphate[c] + (1) 5-10-Methenyltetrahydrofolate[c]	(1) cpd00002[c] + (1) cpd02197[c] --> (1) cpd00008[c] + (1) cpd00009[c] + (1) cpd00347[c]	0,10000	One carbon pool by folate
rxn01652	S-Aminomethyldihydrolipoylprotein:(6S)-tetrahydrofolate	2.1.2.10	sll0171	(1) H2O[c] + (1) 5-10-Methenyltetrahydrofolate[c] <=> (1) H+[c] + (1) 5-Formyltetrahydrofolate[c]	(1) cpd00001[c] + (1) cpd00347[c] <=> (1) cpd00067[c] + (1) cpd02197[c]	-10000,10000	One carbon pool by folate
rxn01268	Prephenate:NAD+ oxidoreductase(decarboxylating)	1.3.1.12	slr2081	(1) NAD[c] + (1) Prephenate[c] --> (1) NADH[c] + (1) CO2[c] + (1) p-hydroxyphenylpyruvate[c]	(1) cpd00003[c] + (1) cpd00219[c] --> (1) cpd00004[c] + (1) cpd00011[c] + (1) cpd00868[c]	0,10000	Novobiocin biosynthesis, Phenylalanine,tyrosine and tryptophan biosynthesis
rxn02749	(R)-2-Methylmalate hydro-lyase	4.2.1.35	sll1444 and sll1470	(1) H2O[c] + (1) Citraconate[c] --> (1) D-Citramalate[c]	(1) cpd00001[c] + (1) cpd01502[c] --> (1) cpd01700[c]	0,10000	Non-fermentative Citramalate Pathway
rxn09122	phosphate transport via ABC system (uptake, periplasm)		(sll0679 or sll0680 or slr1247) and (sll0681 or slr1248) and (sll0682 or slr1249) and (sll0683 or sll0684 or slr1250)	(1) H2O[c] + (1) ATP[c] + (1) Phosphate[p] --> (1) ADP[c] + (2) Phosphate[c] + (1) H+[c]	(1) cpd00001[c] + (1) cpd00002[c] + (1) cpd00009[p] --> (1) cpd00008[c] + (2) cpd00009[c] + (1) cpd00067[c]	0,10000	None
rxn08043	2-aceto-2-hydroxybutanoate synthase	2.2.1.6	(sll1981 and slr2088 and sll0065)	(1) Pyruvate[c] + (1) H+[c] + (1) 2-Oxobutyrate[c] --> (1) CO2[c] + (1) 2-Aceto-2-hydroxybutanoate[c]	(1) cpd00020[c] + (1) cpd00067[c] + (1) cpd00094[c] --> (1) cpd00011[c] + (1) cpd00498[c]	0,10000	None
rxn09310	thiazole phosphate synthesis		(slr0633 or ssr0102)	(1) ATP[c] + (1) L-Tyrosine[c] + (1) L-Cysteine[c] + (1) 1-deoxy-D-xylulose5-phosphate[c] --> (1) H2O[c] + (1) CO2[c] + (1) PPi[c] + (1) AMP[c] + (1) L-Alanine[c] + (1) 4-Methyl-5--2-phosphoethyl-thiazole[c] + (1) 4-Hydroxy-benzylalcohol[c]	(1) cpd00002[c] + (1) cpd00069[c] + (1) cpd00084[c] + (1) cpd08289[c] --> (1) cpd00001[c] + (1) cpd00011[c] + (1) cpd00012[c] + (1) cpd00018[c] + (1) cpd00035[c] + (1) cpd02654[c] + (1) cpd15378[c]	0,10000	None
rxn09276	sulfate transport via ABC system (periplasm)		(slr1452 and slr1453 and slr1454 and slr1455)	(1) H2O[c] + (1) ATP[c] + (1) Sulfate[p] --> (1) ADP[c] + (1) Phosphate[c] + (1) Sulfate[c] + (1) H+[c]	(1) cpd00001[c] + (1) cpd00002[c] + (1) cpd00048[p] --> (1) cpd00008[c] + (1) cpd00009[c] + (1) cpd00048[c] + (1) cpd00067[c]	0,10000	None
rxn00442	2-Oxoglutarate carboxy-lyase	4.1.1.71	sll0603	(1) 2-Oxoglutarate[c] + (1) TPP[c] + (1) H+[c] --> (1) CO2[c] + (1) Succinatesemialdehyde-thiamindiphosphateanion[c]	(1) cpd00024[c] + (1) cpd00056[c] + (1) cpd00067[c] --> (1) cpd00011[c] + (1) cpd03450[c]	0,10000	None
rxn03398	2-succinyl-6-hydroxy-2,4-cyclohexadiene 1-carboxylate synthase	2.2.1.9	sll0603	(1) Isochorismate[c] + (1) Succinatesemialdehyde-thiamindiphosphateanion[c] --> (1) Pyruvate[c] + (1) TPP[c] + (1) SHCHC[c]	(1) cpd00658[c] + (1) cpd03450[c] --> (1) cpd00020[c] + (1) cpd00056[c] + (1) cpd03451[c]	0,10000	None
rxn09072	Pyridoxine 5'-phosphate synthase	1.1.1.262	sll0660	(1) NAD[c] + (1) 4-(Phosphonooxy)-threonine[c] + (1) 1-deoxy-D-xylulose5-phosphate[c] --> (2) H2O[c] + (1) NADH[c] + (1) Phosphate[c] + (1) CO2[c] + (2) H+[c] + (1) Pyridoxine phosphate[c]	(1) cpd00003[c] + (1) cpd03607[c] + (1) cpd08289[c] --> (2) cpd00001[c] + (1) cpd00004[c] + (1) cpd00009[c] + (1) cpd00011[c] + (2) cpd00067[c] + (1) cpd00478[c]	0,10000	None
rxn00137	Adenosine 3',5'-bisphosphate 3'(2')-phosphohydrolase	3.1.3.7	sll0895	(1) H2O[c] + (1) Adenosine 3-5-bisphosphate[c] --> (1) Phosphate[c] + (1) AMP[c] + (1) H+[c]	(1) cpd00001[c] + (1) cpd00045[c] --> (1) cpd00009[c] + (1) cpd00018[c] + (1) cpd00067[c]	0,10000	None
rxn02898	O-Succinylbenzoyl-CoA 1,4-dihydroxy-2-naphthoate-lyase	4.1.3.36	sll1127	(1) Succinylbenzoyl-CoA[c] --> (1) CoA[c] + (1) 1-4-Dihydroxy-2-naphthoate[c]	(1) cpd02021[c] --> (1) cpd00010[c] + (1) cpd02295[c]	0,10000	None
rxn04866	GDP-L-fucose synthase	1.1.1.271	sll1213	(1) NADPH[c] + (1) H+[c] + (1) GDP-4-keto-6-L-deoxygalactose[c] --> (1) NADP[c] + (1) GDP-L-fucose[c]	(1) cpd00005[c] + (1) cpd00067[c] + (1) cpd10527[c] --> (1) cpd00006[c] + (1) cpd00272[c]	0,10000	None
rxn08764	ketol-acid reductoisomerase (2-Acetolactate)	1.1.1.86	sll1363	(1) NADPH[c] + (1) H+[c] + (1) 2-Aceto-2-hydroxybutanoate[c] --> (1) NADP[c] + (1) 2,3-Dihydroxy-3-methylvalerate[c]	(1) cpd00005[c] + (1) cpd00067[c] + (1) cpd00498[c] --> (1) cpd00006[c] + (1) cpd02535[c]	0,10000	None
rxn03635	ADP-glucose:sn-glycerol-3-phosphate 2-b-D-glucosyltransferase	2.4.1.213	sll1566	(1) Glycerol-3-phosphate[c] + (1) ADP-glucose[c] --> (1) ADP[c] + (1) 2-(beta-D-Glucosyl)-sn-glycerol 3-phosphate[c]	(1) cpd00080[c] + (1) cpd00387[c] --> (1) cpd00008[c] + (1) cpd07403[c]	0,10000	None
rxn09997	4-amino-5-hydroxymethyl-2-methylpyrimidine synthetase		slr0118	(1) H2O[c] + (1) Aminoimidazole ribotide[c] --> (0.5) O2[c] + (1) Phosphate[c] + (2) H+[c] + (1) Glycolaldehyde[c] + (1) Toxopyrimidine[c]	(1) cpd00001[c] + (1) cpd02140[c] --> (0.5) cpd00007[c] + (1) cpd00009[c] + (2) cpd00067[c] + (1) cpd00229[c] + (1) cpd00939[c]	0,10000	None
rxn04038	2-(beta-D-glucosyl)-sn-glycerol-3-phosphate phosphohydrolase	3.1.3.69	slr0746	(1) H2O[c] + (1) 2-(beta-D-Glucosyl)-sn-glycerol 3-phosphate[c] --> (1) Phosphate[c] + (1) H+[c] + (1) 2-(beta-D-Glucosyl)-sn-glycerol[c]	(1) cpd00001[c] + (1) cpd07403[c] --> (1) cpd00009[c] + (1) cpd00067[c] + (1) cpd08376[c]	0,10000	None
rxn08277	Cyanate aminohydrolase	4.2.1.104	slr0899	(3) H+[c] + (1) Bicarbonate[c] + (1) Cyanate[c] --> (2) CO2[c] + (1) NH3[c]	(3) cpd00067[c] + (1) cpd00242[c] + (1) cpd01015[c] --> (2) cpd00011[c] + (1) cpd00013[c]	0,10000	None
rxn05031	prephytoene diphosphate:geranylgeranyl-diphosphate	2.5.1.32	slr1255	(1) Prephytoene diphosphate[c] --> (1) PPi[c] + (1) Phytoene[c]	(1) cpd02168[c] --> (1) cpd00012[c] + (1) cpd03205[c]	0,10000	None
rxn05070	squalene mutase (cyclizing)	5.4.99.17	slr2089	(1) Supraene[c] --> (1) Diploptene[c]	(1) cpd00559[c] --> (1) cpd03751[c]	0,10000	None
rxn05071	squalene mutase (cyclizing)	5.4.99.17	slr2089	(1) H2O[c] + (1) Supraene[c] --> (1) 22-Hopanol[c]	(1) cpd00001[c] + (1) cpd00559[c] --> (1) cpd03750[c]	0,10000	None
rxn02374	L-glutamate 5-semialdehyde dehydratase (spontaneous)			(1) L-Glutamate5-semialdehyde[c] --> (1) H2O[c] + (1) H+[c] + (1) 1-Pyrroline-5-carboxylate[c]	(1) cpd00858[c] --> (1) cpd00001[c] + (1) cpd00067[c] + (1) cpd02431[c]	0,10000	None
rxn05937	Ferredoxin:NADP+ oxidoreductase	1.18.1.2	(sll1382 or slr0150 or slr1828 or ssl0020) and sll0248 and slr1643	(1) NADP[c] + (1) H+[c] + (2) Reduced ferredoxin[c] <=> (1) NADPH[c] + (2) Oxidized ferredoxin[c]	(1) cpd00006[c] + (1) cpd00067[c] + (2) cpfdxr22[c] <=> (1) cpd00005[c] + (2) cpfdxo22[c]	-10000,10000	None
rxn08616	D-glucose transport in via proton symport (periplasm)		sll0771	(1) D-Glucose[p] + (1) H+[p] <=> (1) D-Glucose[c] + (1) H+[c]	(1) cpd00027[p] + (1) cpd00067[p] <=> (1) cpd00027[c] + (1) cpd00067[c]	-10000,10000	None
rxn09566	pyridoxal oxidase	1.4.3.5	sll1440	(2) H2O[c] + (0.5) O2[c] + (1) NH3[c] + (1) Pyridoxal[c] <=> (2) H2O2[c] + (1) Pyridoxamine[c]	(2) cpd00001[c] + (0.5) cpd00007[c] + (1) cpd00013[c] + (1) cpd00215[c] <=> (2) cpd00025[c] + (1) cpd00419[c]	-10000,10000	None
rxn00342	L-Asparagine amidohydrolase	3.5.1.1	sll0422	(1) H2O[c] + (1) L-Asparagine[c] --> (1) NH3[c] + (1) L-Aspartate[c]	(1) cpd00001[c] + (1) cpd00132[c] --> (1) cpd00013[c] + (1) cpd00041[c]	0,10000	Nitrogen metabolism, Cyanoamino acid metabolism, Alanine and aspartate metabolism
rxn00416	L-aspartate:L-glutamine amido-ligase (AMP-forming)	6.3.5.4		(1) H2O[c] + (1) ATP[c] + (1) L-Aspartate[c] + (1) L-Glutamine[c] --> (1) PPi[c] + (1) AMP[c] + (1) L-Glutamate[c] + (1) L-Asparagine[c]	(1) cpd00001[c] + (1) cpd00002[c] + (1) cpd00041[c] + (1) cpd00053[c] --> (1) cpd00012[c] + (1) cpd00018[c] + (1) cpd00023[c] + (1) cpd00132[c]	0,10000	Nitrogen metabolism, Alanine and aspartate metabolism
rxn00908	glycine synthase	1.4.4.2	(slr0293 and sll0171 and slr0879 and slr1096)	(1) NAD[c] + (1) Glycine[c] + (1) Tetrahydrofolate[c] --> (1) NADH[c] + (1) CO2[c] + (1) NH3[c] + (1) 5-10-Methylenetetrahydrofolate[c]	(1) cpd00003[c] + (1) cpd00033[c] + (1) cpd00087[c] --> (1) cpd00004[c] + (1) cpd00011[c] + (1) cpd00013[c] + (1) cpd00125[c]	0,10000	Nitrogen metabolism
rxn05894	ferredoxin-nitrate reductase	1.7.7.2	sll1454	(2) H+[c] + (2) Reduced ferredoxin[c] + (1) Nitrate[c] --> (1) H2O[c] + (2) Oxidized ferredoxin[c] + (1) Nitrite[c]	(2) cpd00067[c] + (2) cpfdxr22[c] + (1) cpd00209[c] --> (1) cpd00001[c] + (2) cpfdxo22[c] + (1) cpd00075[c]	0,10000	Nitrogen metabolism
rxn06110_mod	Nitrite:(acceptor) oxidoreductase	1.7.99.4	sll1454	(1) Nitrite[c] + (1) Ubiquinone[c] + (1) H2O[c] --> (1) Nitrate[c] + (1) Ubiquinol[c]	(1) cpd00075[c] + (1) cpd11669[c] + (1) cpd00001[c] --> (1) cpd00209[c] + (1) cpd11665[c]	0,10000	Nitrogen metabolism
rxn12822	L-glutamate:ferredoxin oxidoreductase	1.4.7.1	sll1499	(2) H+[c] + (1) 2-Oxoglutarate[c] + (1) L-Glutamine[c] + (2) Reduced ferredoxin[c] --> (2) L-Glutamate[c] + (2) Oxidized ferredoxin[c]	(2) cpd00067[c] + (1) cpd00024[c] + (1) cpd00053[c] + (2) cpfdxr22[c] --> (2) cpd00023[c] + (2) cpfdxo22[c]	0,10000	Nitrogen metabolism
rxn05893	Ferredoxin-Nitrite Reductase	1.7.7.1	slr0898	(8) H+[c] + (6) Reduced ferredoxin[c] + (1) Nitrite[c] --> (2) H2O[c] + (1) NH3[c] + (6) Oxidized ferredoxin[c]	(8) cpd00067[c] + (6) cpfdxr22[c] + (1) cpd00075[c] --> (2) cpd00001[c] + (1) cpd00013[c] + (6) cpfdxo22[c]	0,10000	Nitrogen metabolism
rxn02529	Cyanate C-N-lyase	4.2.1.104	slr0899	(1) H+[c] + (1) Bicarbonate[c] + (1) Cyanate[c] --> (1) CO2[c] + (1) Carbamate[c]	(1) cpd00067[c] + (1) cpd00242[c] + (1) cpd01015[c] --> (1) cpd00011[c] + (1) cpd01101[c]	0,10000	Nitrogen metabolism
rxn05063	carbamate hydro-lyase	4.2.1.104	slr0899	(1) H2O[c] + (1) Cyanate[c] --> (1) Carbamate[c]	(1) cpd00001[c] + (1) cpd01015[c] --> (1) cpd01101[c]	0,10000	Nitrogen metabolism
rxn00102	Carbonic acid hydro-lyase	4.2.1.1	(slr0051 or slr1347)	(1) H+[c] + (1) Bicarbonate[c] <=> (1) H2O[c] + (1) CO2[c]	(1) cpd00067[c] + (1) cpd00242[c] <=> (1) cpd00001[c] + (1) cpd00011[c]	-10000,10000	Nitrogen metabolism
rxn01806	Nitrous-oxide:(acceptor) oxidoreductase (NO-forming)	1.7.99.7	sll0450	(1) NADH[c] + (2) H+[c] + (2) NO[c] <=> (1) H2O[c] + (1) NAD[c] + (1) Nitrous oxide[c]	(1) cpd00004[c] + (2) cpd00067[c] + (2) cpd00418[c] <=> (1) cpd00001[c] + (1) cpd00003[c] + (1) cpd00659[c]	-10000,10000	Nitrogen metabolism
rxn11932	Nitrous-oxide:(acceptor) oxidoreductase (NO-forming)	1.7.99.7	sll0450	(1) H+[c] + (1) Quinol[c] + (2) NO[c] <=> (1) H2O[c] + (1) Chinone[c] + (1) Nitrous oxide[c]	(1) cpd00067[c] + (1) cpd00415[c] + (2) cpd00418[c] <=> (1) cpd00001[c] + (1) cpd00364[c] + (1) cpd00659[c]	-10000,10000	Nitrogen metabolism
rxn01016	ATP:carbamate phosphotransferase	2.7.2.2	sll0573	(1) ATP[c] + (1) H+[c] + (1) Carbamate[c] <=> (1) ADP[c] + (1) Carbamoylphosphate[c]	(1) cpd00002[c] + (1) cpd00067[c] + (1) cpd01101[c] <=> (1) cpd00008[c] + (1) cpd00146[c]	-10000,10000	Nitrogen metabolism
rxn00077	ATP:NAD+ 2'-phosphotransferase	2.7.1.23	(sll1415 or slr0400)	(1) ATP[c] + (1) NAD[c] --> (1) NADP[c] + (1) ADP[c]	(1) cpd00002[c] + (1) cpd00003[c] --> (1) cpd00006[c] + (1) cpd00008[c]	0,10000	Nicotinate and nicotinamide metabolism
rxn00083	NADPH:NAD+ oxidoreductase (B-specific)	1.6.1.2	(slr1239 and slr1434)	(1) NAD[c] + (1) NADPH[c] --> (1) NADH[c] + (1) NADP[c]	(1) cpd00003[c] + (1) cpd00005[c] --> (1) cpd00004[c] + (1) cpd00006[c]	0,10000	Nicotinate and nicotinamide metabolism
rxn02988	quinolinate synthase	2.5.1.72	sll0622	(1) Glycerone-phosphate[c] + (1) Iminoaspartate[c] --> (2) H2O[c] + (1) Phosphate[c] + (1) H+[c] + (1) Quinolinate[c]	(1) cpd00095[c] + (1) cpd03470[c] --> (2) cpd00001[c] + (1) cpd00009[c] + (1) cpd00067[c] + (1) cpd02333[c]	0,10000	Nicotinate and nicotinamide metabolism
rxn00338	L-aspartate oxidase	1.4.3.16	sll0631	(1) O2[c] + (1) L-Aspartate[c] --> (1) H2O2[c] + (1) H+[c] + (1) Iminoaspartate[c]	(1) cpd00007[c] + (1) cpd00041[c] --> (1) cpd00025[c] + (1) cpd00067[c] + (1) cpd03470[c]	0,10000	Nicotinate and nicotinamide metabolism
rxn00105	ATP:nicotinamide-nucleotide adenylyltransferase	2.7.7.1	slr0787	(1) ATP[c] + (1) Nicotinamide ribonucleotide[c] --> (1) NAD[c] + (1) PPi[c]	(1) cpd00002[c] + (1) cpd00355[c] --> (1) cpd00003[c] + (1) cpd00012[c]	0,10000	Nicotinate and nicotinamide metabolism
rxn02154	Deamino-NAD+ nucleotidohydrolase	3.6.1.9 and 3.6.1.22	slr0787	(1) H2O[c] + (1) Deamido-NAD[c] --> (1) AMP[c] + (1) Nicotinate ribonucleotide[c]	(1) cpd00001[c] + (1) cpd00638[c] --> (1) cpd00018[c] + (1) cpd00873[c]	0,10000	Nicotinate and Nicotinamide Metabolism
rxn00138	Deamino-NAD+:ammonia ligase (AMP-forming)	6.3.1.5	slr1691	(1) ATP[c] + (1) NH3[c] + (1) Deamido-NAD[c] --> (1) NAD[c] + (1) PPi[c] + (1) AMP[c]	(1) cpd00002[c] + (1) cpd00013[c] + (1) cpd00638[c] --> (1) cpd00003[c] + (1) cpd00012[c] + (1) cpd00018[c]	0,10000	Nicotinate and Nicotinamide Metabolism
rxn00190	Deamido-NAD+:L-glutamine amido-ligase (AMP-forming)	6.3.5.1	slr1691	(1) H2O[c] + (1) ATP[c] + (1) L-Glutamine[c] + (1) Deamido-NAD[c] --> (1) NAD[c] + (1) PPi[c] + (1) AMP[c] + (1) L-Glutamate[c]	(1) cpd00001[c] + (1) cpd00002[c] + (1) cpd00053[c] + (1) cpd00638[c] --> (1) cpd00003[c] + (1) cpd00012[c] + (1) cpd00018[c] + (1) cpd00023[c]	0,10000	Nicotinate and Nicotinamide Metabolism
rxn00075	NAD+ glycohydrolase	3.2.2.5		(1) H2O[c] + (1) NAD[c] --> (1) H+[c] + (1) Nicotinamide[c] + (1) ADP-ribose[c]	(1) cpd00001[c] + (1) cpd00003[c] --> (1) cpd00067[c] + (1) cpd00133[c] + (1) cpd00251[c]	0,10000	Nicotinate and nicotinamide metabolism
rxn02155	ATP:nicotinamide-nucleotide adenylyltransferase	2.7.7.18	(slr0787 or sll1916)	(1) ATP[c] + (1) Nicotinate ribonucleotide[c] <=> (1) PPi[c] + (1) Deamido-NAD[c]	(1) cpd00002[c] + (1) cpd00873[c] <=> (1) cpd00012[c] + (1) cpd00638[c]	-10000,10000	Nicotinate and Nicotinamide Metabolism
rxn00941	Nicotinamide-nucleotide:pyrophosphate	2.4.2.12	slr0788	(1) H+[c] + (1) PRPP[c] + (1) Nicotinamide[c] <=> (1) PPi[c] + (1) Nicotinamide ribonucleotide[c]	(1) cpd00067[c] + (1) cpd00103[c] + (1) cpd00133[c] <=> (1) cpd00012[c] + (1) cpd00355[c]	-10000,10000	Nicotinate and nicotinamide metabolism
rxn02402	Nicotinate-nucleotide:pyrophosphate phosphoribosyltransferase	2.4.2.19	slr0936	(1) CO2[c] + (1) PPi[c] + (1) Nicotinate ribonucleotide[c] <=> (2) H+[c] + (1) PRPP[c] + (1) Quinolinate[c]	(1) cpd00011[c] + (1) cpd00012[c] + (1) cpd00873[c] <=> (2) cpd00067[c] + (1) cpd00103[c] + (1) cpd02333[c]	-10000,10000	Nicotinate and nicotinamide metabolism
rxn06709	UDP-N-acetyl-D-glucosamine:N-acetyl-D-glucosaminyl diphosphodolichol	2.4.1.141	slr1656	(1) UDP-N-acetylglucosamine[c] + (1) N-Acetyl-D-glucosaminyldiphosphodolichol[c] <=> (1) UDP[c] + (1) Chitobiosyldiphosphodolichol[c]	(1) cpd00037[c] + (1) cpd12559[c] <=> (1) cpd00014[c] + (1) cpd12568[c]	-10000,10000	N-Glycan biosynthesis
ATPm	ATP maintenance			(1) ATP[c] + (1) H2O[c] --> (1) ADP[c] + (1) Phosphate[c] + (1) H+[c]	(1) cpd00002[c] + (1) cpd00001[c] --> (1) cpd00008[c] + (1) cpd00009[c] + (1) cpd00067[c]	0,10000	Modeling
DM_5mdru1p	methylthioribulose-1-phosphate demand reaction			(1) methylthioribulose-1-phosphate[c] -->	(1) cpd02791[c] -->	0,10000	Modeling
DM_dna5mtc	DNA 5-methylcytosine demand reaction			(1) DNA 5-methylcytosine[c] -->	(1) cpd12223[c] -->	0,10000	Modeling
DM_PHB	PHB Demand reaction			(1) PHB granule[c] -->	(1) cmpd_PHB[c] -->	0,10000	Modeling
Sink_dna	Sink for DNA			(1) DNA[c] <=>	(1) cpd11461[c] <=>	-10000,10000	Modeling
Sink_phbg	Growing PHB granule sink reaction			(1) Growing PHB granule[c] <=>	(1) cpd_phbg[c] <=>	-10000,10000	Modeling
Sink_rdmbzi	alpha-Ribazole sink reaction			(1) alpha-Ribazole[c] <=>	(1) cpd03423[c] <=>	-10000,10000	Modeling
rxn00006	hydrogen-peroxide:hydrogen-peroxide oxidoreductase	1.11.1.6	sll1987	(2) H2O2[c] --> (2) H2O[c] + (1) O2[c]	(2) cpd00025[c] --> (2) cpd00001[c] + (1) cpd00007[c]	0,10000	Minor Metabolite Recycling
rxn00001	Pyrophosphate phosphohydrolase	3.6.1.1	slr1622	(1) H2O[c] + (1) PPi[c] --> (2) Phosphate[c] + (2) H+[c]	(1) cpd00001[c] + (1) cpd00012[c] --> (2) cpd00009[c] + (2) cpd00067[c]	0,10000	Minor Metabolite Recycling
rxn00106	Triphosphate phosphohydrolase	3.6.1.1	slr1622	(1) H2O[c] + (1) Triphosphate[c] --> (1) Phosphate[c] + (1) PPi[c]	(1) cpd00001[c] + (1) cpd00421[c] --> (1) cpd00009[c] + (1) cpd00012[c]	0,10000	Minor Metabolite Recycling
rxn01022	5'-Methylthioadenosine:orthophosphate	2.4.2.28	sll0135	(1) Phosphate[c] + (1) H+[c] + (1) 5-Methylthioadenosine[c] --> (1) Adenine[c] + (1) methylthioribose-1-phosphate[c]	(1) cpd00009[c] + (1) cpd00067[c] + (1) cpd00147[c] --> (1) cpd00128[c] + (1) cpd02574[c]	0,10000	Methionine metabolism, Urea cycle and metabolism of amino groups
rxn00127	S-Adenosyl-L-methionine carboxy-lyase	4.1.1.50		(1) S-Adenosyl-L-methionine[c] + (1) H+[c] --> (1) CO2[c] + (1) S-Adenosylmethioninamine[c]	(1) cpd00017[c] + (1) cpd00067[c] --> (1) cpd00011[c] + (1) cpd00837[c]	0,10000	Methionine metabolism, Urea cycle and metabolism of amino groups
rxn00950	Cystathionine L-homocysteine-lyase (deaminating)	4.4.1.18		(1) H2O[c] + (1) Cystathionine[c] --> (1) NH3[c] + (1) Pyruvate[c] + (1) Homocysteine[c]	(1) cpd00001[c] + (1) cpd00424[c] --> (1) cpd00013[c] + (1) cpd00020[c] + (1) cpd00135[c]	0,10000	Methionine metabolism, Sulfur metabolism, Nitrogen metabolism
rxn00693	5-Methyltetrahydrofolate:L-homocysteine S-methyltransferase	2.1.1.13	slr0212	(1) Homocysteine[c] + (1) 5-Methyltetrahydrofolate[c] --> (1) L-Methionine[c] + (1) Tetrahydrofolate[c]	(1) cpd00135[c] + (1) cpd00345[c] --> (1) cpd00060[c] + (1) cpd00087[c]	0,10000	Methionine metabolism, One carbon pool by folate
rxn06538	10-Formyltetrahydrofolate:L-methionyl-tRNA N-formyltransferase	2.1.2.9	slr0070	(1) 10-Formyltetrahydrofolate[c] + (1) L-Methionyl-tRNA[c] --> (1) H+[c] + (1) Tetrahydrofolate[c] + (1) N-Formylmethionyl-tRNA[c]	(1) cpd00201[c] + (1) cpd12105[c] --> (1) cpd00067[c] + (1) cpd00087[c] + (1) cpd12285[c]	0,10000	Methionine metabolism, Aminoacyl-tRNA biosynthesis, One carbon pool by folate
rxn06443	L-Methionine:tRNAMet ligase (AMP-forming)	6.1.1.10	slr0649	(1) ATP[c] + (1) L-Methionine[c] + (1) H+[c] + (1) tRNA(Met)[c] --> (1) PPi[c] + (1) AMP[c] + (1) L-Methionyl-tRNA[c]	(1) cpd00002[c] + (1) cpd00060[c] + (1) cpd00067[c] + (1) cpd11918[c] --> (1) cpd00012[c] + (1) cpd00018[c] + (1) cpd12105[c]	0,10000	Methionine metabolism, Aminoacyl-tRNA biosynthesis
rxn00126	ATP:L-methione S-adenosyltransferase	2.5.1.6	sll0927	(1) H2O[c] + (1) ATP[c] + (1) L-Methionine[c] --> (1) Phosphate[c] + (1) PPi[c] + (1) S-Adenosyl-L-methionine[c]	(1) cpd00001[c] + (1) cpd00002[c] + (1) cpd00060[c] --> (1) cpd00009[c] + (1) cpd00012[c] + (1) cpd00017[c]	0,10000	Methionine metabolism
rxn00141	S-Adenosyl-L-homocysteine hydrolase	3.3.1.1	sll1234	(1) H2O[c] + (1) S-Adenosyl-homocysteine[c] --> (1) Homocysteine[c] + (1) Adenosine[c]	(1) cpd00001[c] + (1) cpd00019[c] --> (1) cpd00135[c] + (1) cpd00182[c]	0,10000	Methionine metabolism
rxn03057	5-Methylthio-5-deoxy-D-ribose-1-phosphate ketol-isomerase	5.3.1.23	slr1938	(1) methylthioribose-1-phosphate[c] --> (1) methylthioribulose-1-phosphate[c]	(1) cpd02574[c] --> (1) cpd02791[c]	0,10000	Methionine metabolism
rxn00452	S-Adenosyl-L-methionine:L-homocysteine S-methyltransferase	2.1.1.10	slr2141	(1) S-Adenosyl-L-methionine[c] + (1) Homocysteine[c] --> (1) S-Adenosyl-homocysteine[c] + (1) L-Methionine[c] + (1) H+[c]	(1) cpd00017[c] + (1) cpd00135[c] --> (1) cpd00019[c] + (1) cpd00060[c] + (1) cpd00067[c]	0,10000	Methionine metabolism
rxn04792	S-(hydroxymethyl)glutathione dehydrogenase	1.1.1.284	sll0990	(1) NAD[c] + (1) S-(Hydroxymethyl)glutathione[c] <=> (1) NADH[c] + (1) H+[c] + (1) S-Formylglutathione[c]	(1) cpd00003[c] + (1) cpd09879[c] <=> (1) cpd00004[c] + (1) cpd00067[c] + (1) cpd00759[c]	-10000,10000	Methane metabolism
rxn10477	carbon monoxide dehydrogenase / acetyl-CoA synthase 2	Undetermined		(1) H2O[c] + (1) CO[c] + (2) Oxidized ferredoxin[c] <=> (1) CO2[c] + (3) H+[c] + (2) Reduced ferredoxin[c]	(1) cpd00001[c] + (1) cpd00204[c] + (2) cpfdxo22[c] <=> (1) cpd00011[c] + (3) cpd00067[c] + (2) cpfdxr22[c]	-10000,10000	Methane metabolism
rxn03031	tetrahydrodipicolinate succinylase	2.3.1.117		(1) H2O[c] + (1) tetrahydrodipicolinate[c] + (1) Succinyl-CoA[c] --> (1) CoA[c] + (1) N-Succinyl-L-2-amino-6-oxopimelate[c]	(1) cpd00001[c] + (1) cpd02465[c] + (1) cpd00078[c] --> (1) cpd00010[c] + (1) cpd02724[c]	0,10000	Lysine metabolism
rxn00322	L-Lysine carboxy-lyase	4.1.1.18	sll1683	(1) L-Lysine[c] + (1) H+[c] --> (1) CO2[c] + (1) Cadaverine[c]	(1) cpd00039[c] + (1) cpd00067[c] --> (1) cpd00011[c] + (1) cpd01155[c]	0,10000	Lysine degradation, Alkaloid biosynthesis II
rxn02351	5,10-Methylenetetrahydrofolate:glycine hydroxymethyltransferase	2.1.2.1	sll1931	(1) Glycine[c] + (1) 4-Trimethylammoniobutanal[c] <=> (1) 3-Hydroxy-N6,N6,N6-trimethyl-L-lysine[c]	(1) cpd00033[c] + (1) cpd00845[c] <=> (1) cpd00923[c]	-10000,10000	Lysine degradation
rxn00510	N6-(L-1,3-Dicarboxypropyl)-L-lysine:NAD+ oxidoreductase	1.5.1.7	slr0049	(1) H2O[c] + (1) NAD[c] + (1) Saccharopine[c] <=> (1) NADH[c] + (1) 2-Oxoglutarate[c] + (1) L-Lysine[c] + (1) H+[c]	(1) cpd00001[c] + (1) cpd00003[c] + (1) cpd00351[c] <=> (1) cpd00004[c] + (1) cpd00024[c] + (1) cpd00039[c] + (1) cpd00067[c]	-10000,10000	Lysine degradation
rxn02011	UDP-N-acetylmuramoyl-L-alanyl-D-glutamate:meso-2,6-	6.3.2.13	slr0528	(1) ATP[c] + (1) meso-2,6-Diaminopimelate[c] + (1) UDP-N-acetylmuramoyl-L-alanyl-D-glutamate[c] --> (1) ADP[c] + (1) Phosphate[c] + (1) H+[c] + (1) UDP-N-acetylmuramoyl-L-alanyl-D-gamma-glutamyl-meso-2-6-diaminopimelate[c]	(1) cpd00002[c] + (1) cpd00516[c] + (1) cpd00525[c] --> (1) cpd00008[c] + (1) cpd00009[c] + (1) cpd00067[c] + (1) cpd02964[c]	0,10000	Lysine biosynthesis, Peptidoglycan biosynthesis
rxn03164	UDP-N-acetylmuramoyl-L-alanyl-D-glutamyl-meso-2,6-	6.3.2.15	slr1351	(1) ATP[c] + (1) D-Alanyl-D-alanine[c] + (1) UDP-N-acetylmuramoyl-L-alanyl-D-gamma-glutamyl-meso-2-6-diaminopimelate[c] --> (1) ADP[c] + (1) Phosphate[c] + (1) H+[c] + (1) UDP-N-acetylmuramoyl-L-alanyl-D-glutamyl-6-carboxy-L-lysyl-D-alanyl- D-alanine[c]	(1) cpd00002[c] + (1) cpd00731[c] + (1) cpd02964[c] --> (1) cpd00008[c] + (1) cpd00009[c] + (1) cpd00067[c] + (1) cpd02968[c]	0,10000	Lysine biosynthesis, Peptidoglycan biosynthesis
rxn01643	L-Aspartate-4-semialdehyde:NADP+ oxidoreductase (phosphorylating)	1.2.1.11	slr0549	(1) NADPH[c] + (1) 4-Phospho-L-aspartate[c] --> (1) NADP[c] + (1) Phosphate[c] + (1) L-Aspartate4-semialdehyde[c]	(1) cpd00005[c] + (1) cpd01977[c] --> (1) cpd00006[c] + (1) cpd00009[c] + (1) cpd00346[c]	0,10000	Lysine biosynthesis, Glycine,serine and threonine metabolism
rxn00337	ATP:L-aspartate 4-phosphotransferase	2.7.2.4	slr0657	(1) ATP[c] + (1) L-Aspartate[c] + (1) H+[c] --> (1) ADP[c] + (1) 4-Phospho-L-aspartate[c]	(1) cpd00002[c] + (1) cpd00041[c] + (1) cpd00067[c] --> (1) cpd00008[c] + (1) cpd01977[c]	0,10000	Lysine biosynthesis, Glycine,serine and threonine metabolism
rxn01301	L-Homoserine:NAD+ oxidoreductase	1.1.1.3	sll0455	(1) NAD[c] + (1) L-Homoserine[c] <=> (1) NADH[c] + (1) H+[c] + (1) L-Aspartate4-semialdehyde[c]	(1) cpd00003[c] + (1) cpd00227[c] <=> (1) cpd00004[c] + (1) cpd00067[c] + (1) cpd00346[c]	-10000,10000	Lysine biosynthesis, Glycine,serine and threonine metabolism
rxn07441	LL-2,6-diaminoheptanedioate:2-oxoglutarate aminotransferase	2.6.1.83	sll0480	(1) 2-Oxoglutarate[c] + (1) LL-2,6-Diaminopimelate[c] --> (1) H2O[c] + (1) L-Glutamate[c] + (1) H+[c] + (1) tetrahydrodipicolinate[c]	(1) cpd00024[c] + (1) cpd00504[c] --> (1) cpd00001[c] + (1) cpd00023[c] + (1) cpd00067[c] + (1) cpd02465[c]	0,10000	Lysine biosynthesis
rxn00313	meso-2,6-Diaminoheptanedioate carboxy-lyase	4.1.1.20	sll0504	(1) H+[c] + (1) meso-2,6-Diaminopimelate[c] --> (1) CO2[c] + (1) L-Lysine[c]	(1) cpd00067[c] + (1) cpd00516[c] --> (1) cpd00011[c] + (1) cpd00039[c]	0,10000	Lysine biosynthesis
rxn02929	2,3,4,5-Tetrahydrodipicolinate:NADP+ oxidoreductase	1.3.1.26	sll1058	(1) NADPH[c] + (1) H+[c] + (1) Dihydrodipicolinate[c] --> (1) NADP[c] + (1) tetrahydrodipicolinate[c]	(1) cpd00005[c] + (1) cpd00067[c] + (1) cpd02120[c] --> (1) cpd00006[c] + (1) cpd02465[c]	0,10000	Lysine biosynthesis
rxn01644	L-Aspartate-4-semialdehyde hydro-lyase (adding pyruvate and	4.2.1.52	slr0550	(1) Pyruvate[c] + (1) L-Aspartate4-semialdehyde[c] --> (2) H2O[c] + (1) H+[c] + (1) Dihydrodipicolinate[c]	(1) cpd00020[c] + (1) cpd00346[c] --> (2) cpd00001[c] + (1) cpd00067[c] + (1) cpd02120[c]	0,10000	Lysine biosynthesis
rxn01973	N-Succinyl-LL-2,6-diaminoheptanedioate amidohydrolase	3.5.1.18		(1) H2O[c] + (1) N-Succinyl-L-2,6-diaminopimelate[c] --> (1) Succinate[c] + (1) LL-2,6-Diaminopimelate[c]	(1) cpd00001[c] + (1) cpd02698[c] --> (1) cpd00036[c] + (1) cpd00504[c]	0,10000	Lysine biosynthesis
rxn10484	diaminopimelate dehydrogenase	Undetermined		(1) NADP[c] + (1) meso-2,6-Diaminopimelate[c] --> (1) NADPH[c] + (1) NH3[c] + (2) H+[c] + (1) tetrahydrodipicolinate[c]	(1) cpd00006[c] + (1) cpd00516[c] --> (1) cpd00005[c] + (1) cpd00013[c] + (2) cpd00067[c] + (1) cpd02465[c]	0,10000	Lysine biosynthesis
rxn03087	N-Succinyl-L-2,6-diaminoheptanedioate:2-ocoglytarate	2.6.1.17	(sll0006) or (sll0938)	(1) 2-Oxoglutarate[c] + (1) N-Succinyl-L-2,6-diaminopimelate[c] <=> (1) L-Glutamate[c] + (1) N-Succinyl-L-2-amino-6-oxopimelate[c]	(1) cpd00024[c] + (1) cpd02698[c] <=> (1) cpd00023[c] + (1) cpd02724[c]	-10000,10000	Lysine biosynthesis
rxn02928	2,3,4,5-Tetrahydrodipicolinate:NAD+ oxidoreductase	1.3.1.26	sll1058	(1) NAD[c] + (1) tetrahydrodipicolinate[c] <=> (1) NADH[c] + (1) H+[c] + (1) Dihydrodipicolinate[c]	(1) cpd00003[c] + (1) cpd02465[c] <=> (1) cpd00004[c] + (1) cpd00067[c] + (1) cpd02120[c]	-10000,10000	Lysine biosynthesis
rxn01974	LL-2,6-Diaminoheptanedioate 2-epimerase	5.1.1.7	slr1665	(1) LL-2,6-Diaminopimelate[c] <=> (1) meso-2,6-Diaminopimelate[c]	(1) cpd00504[c] <=> (1) cpd00516[c]	-10000,10000	Lysine biosynthesis
rxn03146	UDP-3-O-acetylglucosamine deacetylase	3.5.1.-	sll1508	(1) H2O[c] + (1) UDP-3-O-(beta-hydroxymyristoyl)-N-acetylglucosamine[c] --> (1) Acetate[c] + (1) UDP-3-O-(beta-hydroxymyristoyl)-D-glucosamine[c]	(1) cpd00001[c] + (1) cpd02886[c] --> (1) cpd00029[c] + (1) cpd03584[c]	0,10000	Lipopolysaccharide biosynthesis
rxn03159	UDP-2,3-bis(3-hydroxytetradecanoyl)-beta-D-glucosamine:2,3-bis-(3-	2.4.1.182	slr0015	(1) UDP-2,3-bis(3-hydroxytetradecanoyl)glucosamine[c] + (1) 2,3-Bis(beta-hydoroxymyristoyl)-beta-D-glucosaminyl 1-phosphate[c] --> (1) UDP[c] + (1) Lipid A disaccharide[c]	(1) cpd02835[c] + (1) cpd02930[c] --> (1) cpd00014[c] + (1) cpd03002[c]	0,10000	Lipopolysaccharide biosynthesis
rxn06723	UDP-3-O-(3-hydroxymyristoyl)glucosamine acyltransferase	2.3.1.-	slr0776	(1) (R)-3-Hydroxytetradecanoyl-[acyl-carrier protein][c] + (1) UDP-3-O-(beta-hydroxymyristoyl)-D-glucosamine[c] --> (1) H+[c] + (1) ACP[c] + (1) UDP-2,3-bis(3-hydroxytetradecanoyl)glucosamine[c]	(1) cpd11484[c] + (1) cpd03584[c] --> (1) cpd00067[c] + (1) cpd11493[c] + (1) cpd02835[c]	0,10000	Lipopolysaccharide biosynthesis
rxn03130	UDP-sugar hydrolase			(1) H2O[c] + (1) UDP-2,3-bis(3-hydroxytetradecanoyl)glucosamine[c] --> (1) 2,3-Bis(beta-hydoroxymyristoyl)-beta-D-glucosaminyl 1-phosphate[c] + (1) UMP[c]	(1) cpd00001[c] + (1) cpd02835[c] --> (1) cpd02930[c] + (1) cpd00091[c]	0,10000	Lipopolysaccharide biosynthesis
rxn06729	(R)-3-Hydroxytetradecanoly-[acyl-carrier-protein]:UDP-N-acetyl-	2.3.1.129	sll0379	(1) UDP-N-acetylglucosamine[c] + (1) (R)-3-Hydroxytetradecanoyl-[acyl-carrier protein][c] <=> (1) UDP-3-O-(beta-hydroxymyristoyl)-N-acetylglucosamine[c] + (1) ACP[c]	(1) cpd00037[c] + (1) cpd11484[c] <=> (1) cpd02886[c] + (1) cpd11493[c]	-10000,10000	Lipopolysaccharide biosynthesis
rxn00616	sn-Glycerol-3-phosphate:(acceptor) 2-oxidoreductase	1.1.99.5	sll1085	(1) FAD[c] + (1) Glycerol-3-phosphate[c] --> (1) Glycerone-phosphate[c] + (1) FADH2[c]	(1) cpd00015[c] + (1) cpd00080[c] --> (1) cpd00095[c] + (1) cpd00982[c]	0,10000	Lipid Metabolism
rxn08083	1-tetradecanoyl-sn-glycerol 3-phosphate O-acyltransferase (n-C12:0)	2.3.1.51	sll1848	(1) Dodecanoyl-ACP[c] + (1) 1-dodecanoyl-sn-glycerol 3-phosphate[c] --> (1) ACP[c] + (1) 1,2-didodecanoyl-sn-glycerol 3-phosphate[c]	(1) cpd11468[c] + (1) cpd15325[c] --> (1) cpd11493[c] + (1) cpd15521[c]	0,10000	Lipid Metabolism
rxn08084	1-tetradecanoyl-sn-glycerol 3-phosphate O-acyltransferase (n-C14:0)	2.3.1.51	sll1848	(1) Tetradecanoyl-[acyl-carrier protein][c] + (1) 1-tetradecanoyl-sn-glycerol 3-phosphate[c] --> (1) ACP[c] + (1) 1,2-ditetradecanoyl-sn-glycerol 3-phosphate[c]	(1) cpd11466[c] + (1) cpd15331[c] --> (1) cpd11493[c] + (1) cpd15522[c]	0,10000	Lipid Metabolism
rxn08085	1-tetradec-7-enoyl-sn-glycerol 3-phosphate O-acyltransferase (n-C14:1)	2.3.1.51	sll1848	(1) Tetradecenoyl-ACP[c] + (1) 1-tetradec-7-enoyl-sn-glycerol 3-phosphate[c] --> (1) ACP[c] + (1) 1,2-ditetradec-7-enoyl-sn-glycerol 3-phosphate[c]	(1) cpd15294[c] + (1) cpd15330[c] --> (1) cpd11493[c] + (1) cpd15523[c]	0,10000	Lipid Metabolism
rxn10211	palmitoyl-1-acylglycerol-3-phosphate O-acyltransferase	2.3.1.51	sll1848	(1) Palmitoyl-CoA[c] + (1) 1-hexadecanoyl-sn-glycerol 3-phosphate[c] --> (1) CoA[c] + (1) 1,2-dihexadecanoyl-sn-glycerol 3-phosphate[c]	(1) cpd00134[c] + (1) cpd15327[c] --> (1) cpd00010[c] + (1) cpd15524[c]	0,10000	Lipid Metabolism
rxn10212	myristoyl-1-acylglycerol-3-phosphate O-acyltransferase	2.3.1.51	sll1848	(1) Myristoyl-CoA[c] + (1) 1-tetradecanoyl-sn-glycerol 3-phosphate[c] --> (1) CoA[c] + (1) 1,2-ditetradecanoyl-sn-glycerol 3-phosphate[c]	(1) cpd01695[c] + (1) cpd15331[c] --> (1) cpd00010[c] + (1) cpd15522[c]	0,10000	Lipid Metabolism
rxn10213	stearoyl-1-acylglycerol-3-phosphate O-acyltransferase	2.3.1.51	sll1848	(1) Stearyl-CoA[c] + (1) 1-octadecanoyl-sn-glycerol 3-phosphate[c] --> (1) CoA[c] + (1) 1,2-dioctadecanoyl-sn-glycerol 3-phosphate[c]	(1) cpd00327[c] + (1) cpd15329[c] --> (1) cpd00010[c] + (1) cpd15526[c]	0,10000	Lipid Metabolism
rxn08546	glycerol-3-phosphate acyltransferase (C12:0)	2.3.1.15	sll1973 or slr1510	(1) Glycerol-3-phosphate[c] + (1) Dodecanoyl-ACP[c] --> (1) ACP[c] + (1) 1-dodecanoyl-sn-glycerol 3-phosphate[c]	(1) cpd00080[c] + (1) cpd11468[c] --> (1) cpd11493[c] + (1) cpd15325[c]	0,10000	Lipid Metabolism
rxn08547	glycerol-3-phosphate acyltransferase (C14:0)	2.3.1.15	sll1973 or slr1510	(1) Glycerol-3-phosphate[c] + (1) Tetradecanoyl-[acyl-carrier protein][c] --> (1) ACP[c] + (1) 1-tetradecanoyl-sn-glycerol 3-phosphate[c]	(1) cpd00080[c] + (1) cpd11466[c] --> (1) cpd11493[c] + (1) cpd15331[c]	0,10000	Lipid Metabolism
rxn08548	glycerol-3-phosphate acyltransferase (C14:1)	2.3.1.15	sll1973 or slr1510	(1) Glycerol-3-phosphate[c] + (1) Tetradecenoyl-ACP[c] --> (1) ACP[c] + (1) 1-tetradec-7-enoyl-sn-glycerol 3-phosphate[c]	(1) cpd00080[c] + (1) cpd15294[c] --> (1) cpd11493[c] + (1) cpd15330[c]	0,10000	Lipid Metabolism
rxn10202	palmitoyl-glycerol-3-phosphate O-acyltransferase	2.3.1.15	sll1973 or slr1510	(1) Glycerol-3-phosphate[c] + (1) Palmitoyl-CoA[c] --> (1) CoA[c] + (1) 1-hexadecanoyl-sn-glycerol 3-phosphate[c]	(1) cpd00080[c] + (1) cpd00134[c] --> (1) cpd00010[c] + (1) cpd15327[c]	0,10000	Lipid Metabolism
rxn10203	myristoyl-glycerol-3-phosphate O-acyltransferase	2.3.1.15	sll1973 or slr1510	(1) Glycerol-3-phosphate[c] + (1) Myristoyl-CoA[c] --> (1) CoA[c] + (1) 1-tetradecanoyl-sn-glycerol 3-phosphate[c]	(1) cpd00080[c] + (1) cpd01695[c] --> (1) cpd00010[c] + (1) cpd15331[c]	0,10000	Lipid Metabolism
rxn10204	stearoyl-glycerol-3-phosphate O-acyltransferase	2.3.1.15	sll1973 or slr1510	(1) Glycerol-3-phosphate[c] + (1) Stearyl-CoA[c] --> (1) CoA[c] + (1) 1-octadecanoyl-sn-glycerol 3-phosphate[c]	(1) cpd00080[c] + (1) cpd00327[c] --> (1) cpd00010[c] + (1) cpd15329[c]	0,10000	Lipid Metabolism
SQD2_181	sulfoquinovosyltransferase (n-C18:1)	2.4.1.-	slr0384	(1) 1,2-Diacyl-sn-glycerol (dioctadec-9-enoyl, n-C18:1)[c] + (1) UDP-6-sulfoquinovose[c] --> (1) UDP[c] + (1) Sulfoquinovosyldiacylglycerol (n-C18:1)[c]	(1) 12dgr181:9[c] + (1) cpd08358[c] --> (1) cpd00014[c] + (1) cSQDG181[c]	0,10000	Lipid Metabolism
SQD2_183	sulfoquinovosyltransferase (n-C18:3)	2.4.1.-	slr0384	(1) 1,2-Diacyl-sn-glycerol (dioctadec-6-9-12-trienoyl, n-C18:3)[c] + (1) UDP-6-sulfoquinovose[c] --> (1) UDP[c] + (1) Sulfoquinovosyldiacylglycerol (n-C18:3)[c]	(1) 12dgr183:6:9:12[c] + (1) cpd08358[c] --> (1) cpd00014[c] + (1) sqdg183:6:9:12[c]	0,10000	Lipid Metabolism
SQD2_184	sulfoquinovosyltransferase (n-C18:4)	2.4.1.-	slr0384	(1) 1,2-Diacyl-sn-glycerol (dioctadec-6-9-12-15-tetraenoyl, n-C18:4)[c] + (1) UDP-6-sulfoquinovose[c] --> (1) UDP[c] + (1) Sulfoquinovosyldiacylglycerol (n-C18:4)[c]	(1) 12dgr184:6:9:12:15[c] + (1) cpd08358[c] --> (1) cpd00014[c] + (1) sqdg184:6:9:12:15[c]	0,10000	Lipid Metabolism
SQVT_160	Sulfoquinovosyltransferase (n-C16:0)	2.4.1.-	slr0384	(1) 1,2-Diacyl-sn-glycerol dihexadecanoyl[c] + (1) UDP-6-sulfoquinovose[c] --> (1) UDP[c] + (1) Sulfoquinovosyldiacylglycerol (n-C16:0)[c]	(1) cpd15309[c] + (1) cpd08358[c] --> (1) cpd00014[c] + (1) cSQDG160[c]	0,10000	Lipid Metabolism
SQVT_161	Sulfoquinovosyltransferase (n-C16:1)	2.4.1.-	slr0384	(1) 1,2-Diacyl-sn-glycerol dihexadec-9-enoyl[c] + (1) UDP-6-sulfoquinovose[c] --> (1) UDP[c] + (1) Sulfoquinovosyldiacylglycerol (n-C16:1)[c]	(1) cpd15310[c] + (1) cpd08358[c] --> (1) cpd00014[c] + (1) cSQDG161[c]	0,10000	Lipid Metabolism
SQVT_180	Sulfoquinovosyltransferase (n-C18:0)	2.4.1.-	slr0384	(1) 1,2-Diacyl-sn-glycerol dioctadecanoyl[c] + (1) UDP-6-sulfoquinovose[c] --> (1) UDP[c] + (1) Sulfoquinovosyldiacylglycerol (n-C18:0)[c]	(1) cpd15311[c] + (1) cpd08358[c] --> (1) cpd00014[c] + (1) cSQDG180[c]	0,10000	Lipid Metabolism
SQVT_181	Sulfoquinovosyltransferase (n-C18:1)	2.4.1.-	slr0384	(1) 1,2-Diacyl-sn-glycerol dioctadec-11-enoyl[c] + (1) UDP-6-sulfoquinovose[c] --> (1) UDP[c] + (1) Sulfoquinovosyldiacylglycerol (n-C18:1)[c]	(1) cpd15312[c] + (1) cpd08358[c] --> (1) cpd00014[c] + (1) sqdg181[c]	0,10000	Lipid Metabolism
SQVT_182	Sulfoquinovosyltransferase (n-C18:2)	2.4.1.-	slr0384	(1) 1,2-Diacyl-sn-glycerol (dioctadec-9-12-dienoyl, n-C18:2)[c] + (1) UDP-6-sulfoquinovose[c] --> (1) UDP[c] + (1) Sulfoquinovosyldiacylglycerol (n-C18:2)[c]	(1) cp_DLiGl[c] + (1) cpd08358[c] --> (1) cpd00014[c] + (1) cSQDG182[c]	0,10000	Lipid Metabolism
SQVT_183	Sulfoquinovosyltransferase (n-C18:3)	2.4.1.-	slr0384	(1) 1,2-Diacyl-sn-glycerol (dioctadec-9-12-15-trienoyl, n-C18:3)[c] + (1) UDP-6-sulfoquinovose[c] --> (1) UDP[c] + (1) Sulfoquinovosyldiacylglycerol (n-C18:3)[c]	(1) cp_DaLGl[c] + (1) cpd08358[c] --> (1) cpd00014[c] + (1) cSQDG183[c]	0,10000	Lipid Metabolism
rxn04027	UDP-6-sulfo-6-deoxyglucose sulfohydrolase	3.13.1.1	slr1020	(1) UDP-glucose[c] + (1) Sulfite[c] --> (1) H2O[c] + (1) UDP-6-sulfoquinovose[c]	(1) cpd00026[c] + (1) cpd00081[c] --> (1) cpd00001[c] + (1) cpd08358[c]	0,10000	Lipid Metabolism
rxn00762	Glycerol:NAD+ oxidoreductase	1.1.1.6	slr1167	(1) NAD[c] + (1) Glycerol[c] --> (1) NADH[c] + (1) H+[c] + (1) Glycerone[c]	(1) cpd00003[c] + (1) cpd00100[c] --> (1) cpd00004[c] + (1) cpd00067[c] + (1) cpd00157[c]	0,10000	Lipid Metabolism
rxn08203	CDP-Diacylglycerol pyrophostatase (n-C16:1)	3.6.1.26	slr1235	(1) H2O[c] + (1) CDP-1,2-dihexadec-9-enoylglycerol[c] --> (1) CMP[c] + (1) 1,2-dihexadec-9-enoyl-sn-glycerol 3-phosphate[c]	(1) cpd00001[c] + (1) cpd15418[c] --> (1) cpd00046[c] + (1) cpd15525[c]	0,10000	Lipid Metabolism
rxn08205	CDP-Diacylglycerol pyrophostatase (n-C18:1)	3.6.1.26	slr1235	(1) H2O[c] + (1) CDP-1,2-dioctadec-11-enoylglycerol[c] --> (1) CMP[c] + (1) 1,2-dioctadec-11-enoyl-sn-glycerol 3-phosphate[c]	(1) cpd00001[c] + (1) cpd15420[c] --> (1) cpd00046[c] + (1) cpd15527[c]	0,10000	Lipid Metabolism
DGaS_160	Digalactosyldiacylglycerol synthase (n-C16:0)	2.4.1.241	slr1508	(1) UDP-galactose[c] + (1) 1,2-Diacyl-3-beta-D-galactosyl-sn-glycerol (n-C16)[c] --> (1) Digalactosyl-diacylglycerol(n-C16)[c] + (1) UDP[c]	(1) cpd00043[c] + (1) cpdMG160[c] --> (1) cpdDG160[c] + (1) cpd00014[c]	0,10000	Lipid Metabolism
DGaS_161	Digalactosyldiacylglycerol synthase (n-C16:1)	2.4.1.241	slr1508	(1) UDP-galactose[c] + (1) 1,2-Diacyl-3-beta-D-galactosyl-sn-glycerol (n-C16:1)[c] --> (1) Digalactosyl-diacylglycerol(n-C16:1)[c] + (1) UDP[c]	(1) cpd00043[c] + (1) cpdMG161[c] --> (1) cpdDG161[c] + (1) cpd00014[c]	0,10000	Lipid Metabolism
DGaS_180	Digalactosyldiacylglycerol synthase (n-C18:0)	2.4.1.241	slr1508	(1) UDP-galactose[c] + (1) 1,2-Diacyl-3-beta-D-galactosyl-sn-glycerol (n-C18:0)[c] --> (1) Digalactosyl-diacylglycerol(n-C18:0)[c] + (1) UDP[c]	(1) cpd00043[c] + (1) cpdMG180[c] --> (1) cpdDG180[c] + (1) cpd00014[c]	0,10000	Lipid Metabolism
DGaS_181	Digalactosyldiacylglycerol synthase (n-C18:1)	2.4.1.241	slr1508	(1) UDP-galactose[c] + (1) 1,2-Diacyl-3-beta-D-galactosyl-sn-glycerol (n-C18:1)[c] --> (1) Digalactosyl-diacylglycerol(n-C18:1)[c] + (1) UDP[c]	(1) cpd00043[c] + (1) mgdg181[c] --> (1) dgdg181[c] + (1) cpd00014[c]	0,10000	Lipid Metabolism
DGaS_182	Digalactosyldiacylglycerol synthase (n-C18:2)	2.4.1.241	slr1508	(1) UDP-galactose[c] + (1) 1,2-Diacyl-3-beta-D-galactosyl-sn-glycerol (n-C18:2)[c] --> (1) Digalactosyl-diacylglycerol(n-C18:2)[c] + (1) UDP[c]	(1) cpd00043[c] + (1) cpdMG182[c] --> (1) cpdDG182[c] + (1) cpd00014[c]	0,10000	Lipid Metabolism
DGaS_183	Digalactosyldiacylglycerol synthase (n-C18:3)	2.4.1.241	slr1508	(1) UDP-galactose[c] + (1) 1,2-Diacyl-3-beta-D-galactosyl-sn-glycerol (n-C18:3)[c] --> (1) Digalactosyl-diacylglycerol(n-C18:3)[c] + (1) UDP[c]	(1) cpd00043[c] + (1) cpdMG183[c] --> (1) cpdDG183[c] + (1) cpd00014[c]	0,10000	Lipid Metabolism
DGDG181	digalactosyldiacylglycerol synthase (n-C18:1)	2.4.1.241	slr1508	(1) UDP-galactose[c] + (1) 1,2-Diacyl-3-beta-D-galactosyl-sn-glycerol (n-C18:1)[c] --> (1) UDP[c] + (1) Digalactosyl-diacylglycerol(n-C18:1)[c]	(1) cpd00043[c] + (1) cpdMG181[c] --> (1) cpd00014[c] + (1) cpdDG181[c]	0,10000	Lipid Metabolism
DGDG1836912	digalactosyldiacylglycerol synthase (n-C18:3)	2.4.1.241	slr1508	(1) UDP-galactose[c] + (1) 1,2-Diacyl-3-beta-D-galactosyl-sn-glycerol (n-C18:3)[c] --> (1) UDP[c] + (1) Digalactosyl-diacylglycerol(n-C18:3)[c]	(1) cpd00043[c] + (1) mgdg183:6:9:12[c] --> (1) cpd00014[c] + (1) dgdg183:6:9:12[c]	0,10000	Lipid Metabolism
DGDG184691215	digalactosyldiacylglycerol synthase (n-C18:4)	2.4.1.241	slr1508	(1) UDP-galactose[c] + (1) 1,2-Diacyl-3-beta-D-galactosyl-sn-glycerol (n-C18:4)[c] --> (1) UDP[c] + (1) Digalactosyl-diacylglycerol(n-C18:4)[c]	(1) cpd00043[c] + (1) mgdg184:6:9:12:15[c] --> (1) cpd00014[c] + (1) dgdg184:6:9:12:15[c]	0,10000	Lipid Metabolism
GaT_160	Galactosyltransferase (n-C16:0)	2.4.1.6	slr1508	(1) UDP-galactose[c] + (1) 1,2-Diacyl-sn-glycerol dihexadecanoyl[c] --> (1) 1,2-Diacyl-3-beta-D-galactosyl-sn-glycerol (n-C16)[c] + (1) UDP[c]	(1) cpd00043[c] + (1) cpd15309[c] --> (1) cpdMG160[c] + (1) cpd00014[c]	0,10000	Lipid Metabolism
GaT_161	Galactosyltransferase (n-C16:1)	2.4.1.6	slr1508	(1) UDP-galactose[c] + (1) 1,2-Diacyl-sn-glycerol dihexadec-9-enoyl[c] --> (1) 1,2-Diacyl-3-beta-D-galactosyl-sn-glycerol (n-C16:1)[c] + (1) UDP[c]	(1) cpd00043[c] + (1) cpd15310[c] --> (1) cpdMG161[c] + (1) cpd00014[c]	0,10000	Lipid Metabolism
GaT_180	Galactosyltransferase (n-C18:0)	2.4.1.6	slr1508	(1) UDP-galactose[c] + (1) 1,2-Diacyl-sn-glycerol dioctadecanoyl[c] --> (1) 1,2-Diacyl-3-beta-D-galactosyl-sn-glycerol (n-C18:0)[c] + (1) UDP[c]	(1) cpd00043[c] + (1) cpd15311[c] --> (1) cpdMG180[c] + (1) cpd00014[c]	0,10000	Lipid Metabolism
GaT_181	Galactosyltransferase (n-C18:1)	2.4.1.6	slr1508	(1) UDP-galactose[c] + (1) 1,2-Diacyl-sn-glycerol dioctadec-11-enoyl[c] --> (1) 1,2-Diacyl-3-beta-D-galactosyl-sn-glycerol (n-C18:1)[c] + (1) UDP[c]	(1) cpd00043[c] + (1) cpd15312[c] --> (1) mgdg181[c] + (1) cpd00014[c]	0,10000	Lipid Metabolism
GaT_182	Galactosyltransferase (n-C18:2)	2.4.1.6	slr1508	(1) UDP-galactose[c] + (1) 1,2-Diacyl-sn-glycerol (dioctadec-9-12-dienoyl, n-C18:2)[c] --> (1) 1,2-Diacyl-3-beta-D-galactosyl-sn-glycerol (n-C18:2)[c] + (1) UDP[c]	(1) cpd00043[c] + (1) cp_DLiGl[c] --> (1) cpdMG182[c] + (1) cpd00014[c]	0,10000	Lipid Metabolism
GaT_183	Galactosyltransferase (n-C18:3)	2.4.1.6	slr1508	(1) UDP-galactose[c] + (1) 1,2-Diacyl-sn-glycerol (dioctadec-9-12-15-trienoyl, n-C18:3)[c] --> (1) 1,2-Diacyl-3-beta-D-galactosyl-sn-glycerol (n-C18:3)[c] + (1) UDP[c]	(1) cpd00043[c] + (1) cp_DaLGl[c] --> (1) cpdMG183[c] + (1) cpd00014[c]	0,10000	Lipid Metabolism
MGDG181	UDPgalactose:1,2-diacylglycerol 3-beta-D-galactosyltransferase (n-C18:1)	2.4.1.6	slr1508	(1) UDP-galactose[c] + (1) 1,2-Diacyl-sn-glycerol (dioctadec-9-enoyl, n-C18:1)[c] --> (1) UDP[c] + (1) 1,2-Diacyl-3-beta-D-galactosyl-sn-glycerol (n-C18:1)[c]	(1) cpd00043[c] + (1) 12dgr181:9[c] --> (1) cpd00014[c] + (1) cpdMG181[c]	0,10000	Lipid Metabolism
MGDG1836912	UDPgalactose:1,2-diacylglycerol 3-beta-D-galactosyltransferase (n-C18:3)	2.4.1.6	slr1508	(1) UDP-galactose[c] + (1) 1,2-Diacyl-sn-glycerol (dioctadec-6-9-12-trienoyl, n-C18:3)[c] --> (1) UDP[c] + (1) 1,2-Diacyl-3-beta-D-galactosyl-sn-glycerol (n-C18:3)[c]	(1) cpd00043[c] + (1) 12dgr183:6:9:12[c] --> (1) cpd00014[c] + (1) mgdg183:6:9:12[c]	0,10000	Lipid Metabolism
MGDG184691215	UDPgalactose:1,2-diacylglycerol 3-beta-D-galactosyltransferase (n-C18:4)	2.4.1.6	slr1508	(1) UDP-galactose[c] + (1) 1,2-Diacyl-sn-glycerol (dioctadec-6-9-12-15-tetraenoyl, n-C18:4)[c] --> (1) UDP[c] + (1) 1,2-Diacyl-3-beta-D-galactosyl-sn-glycerol (n-C18:4)[c]	(1) cpd00043[c] + (1) 12dgr184:6:9:12:15[c] --> (1) cpd00014[c] + (1) mgdg184:6:9:12:15[c]	0,10000	Lipid Metabolism
rxn00615	ATP:glycerol 3-phosphotransferase	2.7.1.30	slr1672	(1) ATP[c] + (1) Glycerol[c] --> (1) ADP[c] + (1) Glycerol-3-phosphate[c]	(1) cpd00002[c] + (1) cpd00100[c] --> (1) cpd00008[c] + (1) cpd00080[c]	0,10000	Lipid Metabolism
rxn01102	ATP:(R)-glycerate 3-phosphotransferase	2.7.1.31	slr1840	(1) ATP[c] + (1) Glycerate[c] --> (1) ADP[c] + (1) 3-Phosphoglycerate[c]	(1) cpd00002[c] + (1) cpd00223[c] --> (1) cpd00008[c] + (1) cpd00169[c]	0,10000	Lipid Metabolism
rxn09062	Phosphatidate phosphatase (n-C12:0)	3.1.3.4	slr1929	(1) H2O[c] + (1) 1,2-didodecanoyl-sn-glycerol 3-phosphate[c] --> (1) Phosphate[c] + (1) H+[c] + (1) 1,2-Diacyl-sn-glycerol didodecanoyl[c]	(1) cpd00001[c] + (1) cpd15521[c] --> (1) cpd00009[c] + (1) cpd00067[c] + (1) cpd15306[c]	0,10000	Lipid Metabolism
P_Phos182	Phosphatidate phosphatase (n-C18:2)	3.1.3.4		(1) H2O[c] + (1) 1,2-dioctadec-9-12-dienoyl-sn-glycerol 3-phosphate[c] + (1) H+[c] --> (1) Phosphate[c] + (1) 1,2-Diacyl-sn-glycerol (dioctadec-9-12-dienoyl, n-C18:2)[c]	(1) cpd00001[c] + (1) c_DLiG3P[c] + (1) cpd00067[c] --> (1) cpd00009[c] + (1) cp_DLiGl[c]	0,10000	Lipid Metabolism
P_Phos183	Phosphatidate phosphatase (n-C18:3)	3.1.3.4		(1) H2O[c] + (1) 1,2-dioctadec-9-12-15-trienoyl-sn-glycerol 3-phosphate[c] + (1) H+[c] --> (1) Phosphate[c] + (1) 1,2-Diacyl-sn-glycerol (dioctadec-9-12-15-trienoyl, n-C18:3)[c]	(1) cpd00001[c] + (1) c_DaLG3P[c] + (1) cpd00067[c] --> (1) cpd00009[c] + (1) cp_DaLGl[c]	0,10000	Lipid Metabolism
PAPA181	Phosphatidate phosphatase (n-C18:1)	3.1.3.4		(1) H2O[c] + (1) 1,2-dioctadec-9-enoyl-sn-glycerol 3-phosphate[c] --> (1) Phosphate[c] + (1) 1,2-Diacyl-sn-glycerol (dioctadec-9-enoyl, n-C18:1)[c]	(1) cpd00001[c] + (1) pa181:9[c] --> (1) cpd00009[c] + (1) 12dgr181:9[c]	0,10000	Lipid Metabolism
PAPA1836912	Phosphatidate phosphatase (n-C18:3)	3.1.3.4		(1) H2O[c] + (1) 1,2-dioctadec-6-9-12-trienoyl-sn-glycerol 3-phosphate[c] --> (1) Phosphate[c] + (1) 1,2-Diacyl-sn-glycerol (dioctadec-6-9-12-trienoyl, n-C18:3)[c]	(1) cpd00001[c] + (1) pa183:6:9:12[c] --> (1) cpd00009[c] + (1) 12dgr183:6:9:12[c]	0,10000	Lipid Metabolism
PAPA184691215	Phosphatidate phosphatase (n-C18:4)	3.1.3.4		(1) H2O[c] + (1) 1,2-dioctadec-6-9-12-15-tetraenoyl-sn-glycerol 3-phosphate[c] --> (1) Phosphate[c] + (1) 1,2-Diacyl-sn-glycerol (dioctadec-6-9-12-15-tetraenoyl, n-C18:4)[c]	(1) cpd00001[c] + (1) pa184:6:9:12:15[c] --> (1) cpd00009[c] + (1) 12dgr184:6:9:12:15[c]	0,10000	Lipid Metabolism
rxn04683	Phosphoethanolamine phosphohydrolase	3.1.3.75		(1) H2O[c] + (1) Phosphoethanolamine[c] --> (1) Phosphate[c] + (1) H+[c] + (1) Aminoethanol[c]	(1) cpd00001[c] + (1) cpd00285[c] --> (1) cpd00009[c] + (1) cpd00067[c] + (1) cpd00162[c]	0,10000	Lipid Metabolism
rxn09065	Phosphatidate phosphatase (n-C16:0)	3.1.3.4		(1) H2O[c] + (1) 1,2-dihexadecanoyl-sn-glycerol 3-phosphate[c] --> (1) Phosphate[c] + (1) H+[c] + (1) 1,2-Diacyl-sn-glycerol dihexadecanoyl[c]	(1) cpd00001[c] + (1) cpd15524[c] --> (1) cpd00009[c] + (1) cpd00067[c] + (1) cpd15309[c]	0,10000	Lipid Metabolism
rxn09066	Phosphatidate phosphatase (n-C16:1)	3.1.3.4		(1) H2O[c] + (1) 1,2-dihexadec-9-enoyl-sn-glycerol 3-phosphate[c] --> (1) Phosphate[c] + (1) H+[c] + (1) 1,2-Diacyl-sn-glycerol dihexadec-9-enoyl[c]	(1) cpd00001[c] + (1) cpd15525[c] --> (1) cpd00009[c] + (1) cpd00067[c] + (1) cpd15310[c]	0,10000	Lipid Metabolism
rxn09067	Phosphatidate phosphatase (n-C18:0)	3.1.3.4		(1) H2O[c] + (1) 1,2-dioctadecanoyl-sn-glycerol 3-phosphate[c] --> (1) Phosphate[c] + (1) H+[c] + (1) 1,2-Diacyl-sn-glycerol dioctadecanoyl[c]	(1) cpd00001[c] + (1) cpd15526[c] --> (1) cpd00009[c] + (1) cpd00067[c] + (1) cpd15311[c]	0,10000	Lipid Metabolism
rxn09068	Phosphatidate phosphatase (n-C18:1)	3.1.3.4		(1) H2O[c] + (1) 1,2-dioctadec-11-enoyl-sn-glycerol 3-phosphate[c] --> (1) Phosphate[c] + (1) H+[c] + (1) 1,2-Diacyl-sn-glycerol dioctadec-11-enoyl[c]	(1) cpd00001[c] + (1) cpd15527[c] --> (1) cpd00009[c] + (1) cpd00067[c] + (1) cpd15312[c]	0,10000	Lipid Metabolism
rxn01071	ATP:ethanolamine O-phosphotransferase	2.7.1.82	sll0066	(1) ATP[c] + (1) Aminoethanol[c] <=> (1) ADP[c] + (1) Phosphoethanolamine[c]	(1) cpd00002[c] + (1) cpd00162[c] <=> (1) cpd00008[c] + (1) cpd00285[c]	-10000,10000	Lipid Metabolism
rxn00763	Glycerol:NAD+ oxidoreductase	1.1.1.1	sll0990	(1) NAD[c] + (1) Glycerol[c] <=> (1) NADH[c] + (1) H+[c] + (1) D-Glyceraldehyde[c]	(1) cpd00003[c] + (1) cpd00100[c] <=> (1) cpd00004[c] + (1) cpd00067[c] + (1) cpd00448[c]	-10000,10000	Lipid Metabolism
rxn09108	Phosphatidylglycerol synthase (n-C12:0)	2.7.8.5	sll1522	(1) Glycerol-3-phosphate[c] + (1) CDP-1,2-didodecanoylglycerol[c] <=> (1) CMP[c] + (1) Phosphatidylglycerophosphate didodecanoyl[c]	(1) cpd00080[c] + (1) cpd15417[c] <=> (1) cpd00046[c] + (1) cpd15542[c]	-10000,10000	Lipid Metabolism
rxn09109	Phosphatidylglycerol synthase (n-C14:0)	2.7.8.5	sll1522	(1) Glycerol-3-phosphate[c] + (1) CDP-1,2-ditetradecanoylglycerol[c] <=> (1) CMP[c] + (1) Phosphatidylglycerophosphate ditetradecanoyl[c]	(1) cpd00080[c] + (1) cpd15423[c] <=> (1) cpd00046[c] + (1) cpd15543[c]	-10000,10000	Lipid Metabolism
rxn09110	Phosphatidylglycerol synthase (n-C14:1)	2.7.8.5	sll1522	(1) Glycerol-3-phosphate[c] + (1) CDP-1,2-ditetradec-7-enoylglycerol[c] <=> (1) CMP[c] + (1) Phosphatidylglycerophosphate ditetradec-7-enoyl[c]	(1) cpd00080[c] + (1) cpd15422[c] <=> (1) cpd00046[c] + (1) cpd15544[c]	-10000,10000	Lipid Metabolism
rxn10259	isoheptadecanoyl-CDPdiacylglycerol:sn-glycerol-3-phosphate 3-phosphatidyltransferase	2.7.8.5	sll1522	(1) Glycerol-3-phosphate[c] + (1) CDP-1,2-diisoheptadecanoylglycerol[c] <=> (1) CMP[c] + (1) Diisoheptadecanoylphosphatidylglycerophosphate[c]	(1) cpd00080[c] + (1) cpd15683[c] <=> (1) cpd00046[c] + (1) cpd15716[c]	-10000,10000	Lipid Metabolism
rxn10260	anteisoheptadecanoyl-CDPdiacylglycerol:sn-glycerol-3-phosphate 3-phosphatidyltransferase	2.7.8.5	sll1522	(1) Glycerol-3-phosphate[c] + (1) CDP-1,2-dianteisoheptadecanoylglycerol[c] <=> (1) CMP[c] + (1) Dianteisoheptadecanoylphosphatidylglycerophosphate[c]	(1) cpd00080[c] + (1) cpd15684[c] <=> (1) cpd00046[c] + (1) cpd15717[c]	-10000,10000	Lipid Metabolism
rxn10261	isotetradecanoyl-CDPdiacylglycerol:sn-glycerol-3-phosphate 3-phosphatidyltransferase	2.7.8.5	sll1522	(1) Glycerol-3-phosphate[c] + (1) CDP-1,2-diisotetradecanoylglycerol[c] <=> (1) CMP[c] + (1) Diisotetradecanoylphosphatidylglycerophosphate[c]	(1) cpd00080[c] + (1) cpd15685[c] <=> (1) cpd00046[c] + (1) cpd15718[c]	-10000,10000	Lipid Metabolism
rxn10262	isopentadecanoyl-CDPdiacylglycerol:sn-glycerol-3-phosphate 3-phosphatidyltransferase	2.7.8.5	sll1522	(1) Glycerol-3-phosphate[c] + (1) CDP-1,2-diisopentadecanoylglycerol[c] <=> (1) CMP[c] + (1) Diisopentadecanoylphosphatidylglycerophosphate[c]	(1) cpd00080[c] + (1) cpd15686[c] <=> (1) cpd00046[c] + (1) cpd15719[c]	-10000,10000	Lipid Metabolism
rxn10263	anteisopentadecanoyl-CDPdiacylglycerol:sn-glycerol-3-phosphate 3-phosphatidyltransferase	2.7.8.5	sll1522	(1) Glycerol-3-phosphate[c] + (1) CDP-1,2-dianteisopentadecanoylglycerol[c] <=> (1) CMP[c] + (1) Dianteisopentadecanoylphosphatidylglycerophosphate[c]	(1) cpd00080[c] + (1) cpd15687[c] <=> (1) cpd00046[c] + (1) cpd15720[c]	-10000,10000	Lipid Metabolism
rxn10264	isohexadecanoyl-CDPdiacylglycerol:sn-glycerol-3-phosphate 3-phosphatidyltransferase	2.7.8.5	sll1522	(1) Glycerol-3-phosphate[c] + (1) CDP-1,2-diisohexadecanoylglycerol[c] <=> (1) CMP[c] + (1) Diisohexadecanoylphosphatidylglycerophosphate[c]	(1) cpd00080[c] + (1) cpd15688[c] <=> (1) cpd00046[c] + (1) cpd15721[c]	-10000,10000	Lipid Metabolism
rxn08294	diacylglycerol kinase (n-C12:0)	2.7.1.107	slr0054	(1) ATP[c] + (1) 1,2-Diacyl-sn-glycerol didodecanoyl[c] <=> (1) ADP[c] + (1) 1,2-didodecanoyl-sn-glycerol 3-phosphate[c]	(1) cpd00002[c] + (1) cpd15306[c] <=> (1) cpd00008[c] + (1) cpd15521[c]	-10000,10000	Lipid Metabolism
rxn08297	diacylglycerol kinase (n-C16:0)	2.7.1.107	slr0054	(1) ATP[c] + (1) 1,2-Diacyl-sn-glycerol dihexadecanoyl[c] <=> (1) ADP[c] + (1) 1,2-dihexadecanoyl-sn-glycerol 3-phosphate[c]	(1) cpd00002[c] + (1) cpd15309[c] <=> (1) cpd00008[c] + (1) cpd15524[c]	-10000,10000	Lipid Metabolism
rxn08298	diacylglycerol kinase (n-C16:1)	2.7.1.107	slr0054	(1) ATP[c] + (1) 1,2-Diacyl-sn-glycerol dihexadec-9-enoyl[c] <=> (1) ADP[c] + (1) 1,2-dihexadec-9-enoyl-sn-glycerol 3-phosphate[c]	(1) cpd00002[c] + (1) cpd15310[c] <=> (1) cpd00008[c] + (1) cpd15525[c]	-10000,10000	Lipid Metabolism
rxn08299	diacylglycerol kinase (n-C18:0)	2.7.1.107	slr0054	(1) ATP[c] + (1) 1,2-Diacyl-sn-glycerol dioctadecanoyl[c] <=> (1) ADP[c] + (1) 1,2-dioctadecanoyl-sn-glycerol 3-phosphate[c]	(1) cpd00002[c] + (1) cpd15311[c] <=> (1) cpd00008[c] + (1) cpd15526[c]	-10000,10000	Lipid Metabolism
rxn08300	diacylglycerol kinase (n-C18:1)	2.7.1.107	slr0054	(1) ATP[c] + (1) 1,2-Diacyl-sn-glycerol dioctadec-11-enoyl[c] <=> (1) ADP[c] + (1) 1,2-dioctadec-11-enoyl-sn-glycerol 3-phosphate[c]	(1) cpd00002[c] + (1) cpd15312[c] <=> (1) cpd00008[c] + (1) cpd15527[c]	-10000,10000	Lipid Metabolism
rxn01286	D-Glyceraldehyde:NAD+ oxidoreductase	1.2.1.3	slr0091	(1) H2O[c] + (1) NAD[c] + (1) D-Glyceraldehyde[c] <=> (1) NADH[c] + (2) H+[c] + (1) Glycerate[c]	(1) cpd00001[c] + (1) cpd00003[c] + (1) cpd00448[c] <=> (1) cpd00004[c] + (2) cpd00067[c] + (1) cpd00223[c]	-10000,10000	Lipid Metabolism
rxn08306	CDP-diacylglycerol synthetase (n-C12:0)	2.7.7.41	slr1369	(1) CTP[c] + (1) 1,2-didodecanoyl-sn-glycerol 3-phosphate[c] <=> (1) PPi[c] + (1) CDP-1,2-didodecanoylglycerol[c]	(1) cpd00052[c] + (1) cpd15521[c] <=> (1) cpd00012[c] + (1) cpd15417[c]	-10000,10000	Lipid Metabolism
rxn08307	CDP-diacylglycerol synthetase (n-C14:0)	2.7.7.41	slr1369	(1) CTP[c] + (1) 1,2-ditetradecanoyl-sn-glycerol 3-phosphate[c] <=> (1) PPi[c] + (1) CDP-1,2-ditetradecanoylglycerol[c]	(1) cpd00052[c] + (1) cpd15522[c] <=> (1) cpd00012[c] + (1) cpd15423[c]	-10000,10000	Lipid Metabolism
rxn08308	CDP-diacylglycerol synthetase (n-C14:1)	2.7.7.41	slr1369	(1) CTP[c] + (1) 1,2-ditetradec-7-enoyl-sn-glycerol 3-phosphate[c] <=> (1) PPi[c] + (1) CDP-1,2-ditetradec-7-enoylglycerol[c]	(1) cpd00052[c] + (1) cpd15523[c] <=> (1) cpd00012[c] + (1) cpd15422[c]	-10000,10000	Lipid Metabolism
rxn10220	isoheptadecanoyl-phosphatidate cytidylyltransferase	2.7.7.41	slr1369	(1) CTP[c] + (1) 1,2-diisoheptadecanoyl-sn-glycerol 3-phosphate[c] <=> (1) PPi[c] + (1) CDP-1,2-diisoheptadecanoylglycerol[c]	(1) cpd00052[c] + (1) cpd15677[c] <=> (1) cpd00012[c] + (1) cpd15683[c]	-10000,10000	Lipid Metabolism
rxn10221	anteisoheptadecanoyl-phosphatidate cytidylyltransferase	2.7.7.41	slr1369	(1) CTP[c] + (1) 1,2-dianteisoheptadecanoyl-sn-glycerol 3-phosphate[c] <=> (1) PPi[c] + (1) CDP-1,2-dianteisoheptadecanoylglycerol[c]	(1) cpd00052[c] + (1) cpd15678[c] <=> (1) cpd00012[c] + (1) cpd15684[c]	-10000,10000	Lipid Metabolism
rxn10222	isotetradecanoyl-phosphatidate cytidylyltransferase	2.7.7.41	slr1369	(1) CTP[c] + (1) 1,2-diisotetradecanoyl-sn-glycerol 3-phosphate[c] <=> (1) PPi[c] + (1) CDP-1,2-diisotetradecanoylglycerol[c]	(1) cpd00052[c] + (1) cpd15679[c] <=> (1) cpd00012[c] + (1) cpd15685[c]	-10000,10000	Lipid Metabolism
rxn10223	isopentadecanoyl-phosphatidate cytidylyltransferase	2.7.7.41	slr1369	(1) CTP[c] + (1) 1,2-diisopentadecanoyl-sn-glycerol 3-phosphate[c] <=> (1) PPi[c] + (1) CDP-1,2-diisopentadecanoylglycerol[c]	(1) cpd00052[c] + (1) cpd15680[c] <=> (1) cpd00012[c] + (1) cpd15686[c]	-10000,10000	Lipid Metabolism
rxn10224	anteisopentadecanoyl-phosphatidate cytidylyltransferase	2.7.7.41	slr1369	(1) CTP[c] + (1) 1,2-dianteisopentadecanoyl-sn-glycerol 3-phosphate[c] <=> (1) PPi[c] + (1) CDP-1,2-dianteisopentadecanoylglycerol[c]	(1) cpd00052[c] + (1) cpd15681[c] <=> (1) cpd00012[c] + (1) cpd15687[c]	-10000,10000	Lipid Metabolism
rxn10225	isohexadecanoyl-phosphatidate cytidylyltransferase	2.7.7.41	slr1369	(1) CTP[c] + (1) 1,2-diisohexadecanoyl-sn-glycerol 3-phosphate[c] <=> (1) PPi[c] + (1) CDP-1,2-diisohexadecanoylglycerol[c]	(1) cpd00052[c] + (1) cpd15682[c] <=> (1) cpd00012[c] + (1) cpd15688[c]	-10000,10000	Lipid Metabolism
rxn00612	sn-Glycerol-3-phosphate:NADP+ 2-oxidoreductase	1.1.1.94	slr1755	(1) NADP[c] + (1) Glycerol-3-phosphate[c] <=> (1) NADPH[c] + (1) H+[c] + (1) Glycerone-phosphate[c]	(1) cpd00006[c] + (1) cpd00080[c] <=> (1) cpd00005[c] + (1) cpd00067[c] + (1) cpd00095[c]	-10000,10000	Lipid Metabolism
rxn09145	Phospholipase A2 (phosphatidate, n-C14:0) (periplasm)	3.1.1.4	slr7068	(1) H2O[c] + (1) 1,2-ditetradecanoyl-sn-glycerol 3-phosphate[c] <=> (1) H+[c] + (1) Tetradecanoate[c] + (1) 1-tetradecanoyl-sn-glycerol 3-phosphate[c]	(1) cpd00001[c] + (1) cpd15522[c] <=> (1) cpd00067[c] + (1) cpd03847[c] + (1) cpd15331[c]	-10000,10000	Lipid Metabolism
rxnSerineSyn2	3-phosphoserine phosphatase	3.1.3.3	slr1124	(1) 3-phosphoserine + (1) H2O --> (1) L-Serine + (1) Phosphate	(1) 3phosphoser[c] + (1) cpd00001[c] --> (1) cpd00054[c] + (1) cpd00009[c]	0,10000	light-independent serine biosynthesis	[3]
rxnSerineSyn1	phosphoserine transaminase	2.6.1.52	slr1124	(1) 3-Phosphonooxypyruvate + (1) L-Glutamate <=> (1) 3-phosphoserine + (1)	(1) cpd02069[c] + (1) cpd00023[c] <=> (1) 3phosphoser[c] + (1) cpd00024[c]	-10000,10000	light-independent serine biosynthesis	[3]
rxn00609	myo-Inositol-1-phosphate synthase	5.5.1.4	(sll1722 or sll1981)	(1) D-glucose-6-phosphate[c] --> (1) Inositol 1-phosphate[c]	(1) cpd00079[c] --> (1) cpd00867[c]	0,10000	Inositol phosphate metabolism
rxn00882	myo-Inositol 4-phosphate phosphahydrolase	3.1.3.25	sll1383	(1) H2O[c] + (1) Inositol 4-phosphate[c] --> (1) Phosphate[c] + (1) H+[c] + (1) L-Inositol[c]	(1) cpd00001[c] + (1) cpd02230[c] --> (1) cpd00009[c] + (1) cpd00067[c] + (1) cpd00121[c]	0,10000	Inositol phosphate metabolism
rxn00883	1D-myo-Inositol 3-phosphate phosphahydrolase	3.1.3.25	sll1383	(1) H2O[c] + (1) Inositol 3-phosphate[c] --> (1) Phosphate[c] + (1) H+[c] + (1) L-Inositol[c]	(1) cpd00001[c] + (1) cpd02484[c] --> (1) cpd00009[c] + (1) cpd00067[c] + (1) cpd00121[c]	0,10000	Inositol phosphate metabolism
H2ASE_syn	Bidirectional [NiFe] Hydrogenase		(sll1220 and sll1221 and sll1223 and sll1224 and sll1226)	(1) H+[c] + (1) NADPH[c] <=> (1) NADP[c] + (1) H2[c]	(1) cpd00067[c] + (1) cpd00005[c] <=> (1) cpd00006[c] + (1) cpd11640[c]	-10000,10000	Hydrogen Production
rxn02320	5-Amino-2-oxopentanoate:2-oxoglutarate aminotransferase	2.6.1.9	(sll1713) or (sll1958)	(1) L-Glutamate[c] + (1) imidazole acetol-phosphate[c] --> (1) 2-Oxoglutarate[c] + (1) L-histidinol-phosphate[c]	(1) cpd00023[c] + (1) cpd00930[c] --> (1) cpd00024[c] + (1) cpd00807[c]	0,10000	Histidine metabolism
rxn03135	Imidazole-glycerol-3-phosphate synthase		(sll1893 ) or (slr0084)	(1) L-Glutamine[c] + (1) phosphoribulosylformimino-AICAR-phosphate[c] --> (1) L-Glutamate[c] + (1) H+[c] + (1) D-erythro-imidazole-glycerol-phosphate[c] + (1) AICAR[c]	(1) cpd00053[c] + (1) cpd02991[c] --> (1) cpd00023[c] + (1) cpd00067[c] + (1) cpd02843[c] + (1) cpd02851[c]	0,10000	Histidine metabolism
rxn00859	L-Histidinol:NAD+ oxidoreductase	1.1.1.23	(slr0682 or slr1848)	(1) H2O[c] + (2) NAD[c] + (1) L-Histidinol[c] --> (2) NADH[c] + (3) H+[c] + (1) L-Histidine[c]	(1) cpd00001[c] + (2) cpd00003[c] + (1) cpd00641[c] --> (2) cpd00004[c] + (3) cpd00067[c] + (1) cpd00119[c]	0,10000	Histidine metabolism
rxn00863	L-Histidinal:NAD+ oxidoreductase	1.1.1.23	(slr0682 or slr1848)	(1) H2O[c] + (1) NAD[c] + (1) L-Histidinal[c] --> (1) NADH[c] + (2) H+[c] + (1) L-Histidine[c]	(1) cpd00001[c] + (1) cpd00003[c] + (1) cpd01324[c] --> (1) cpd00004[c] + (2) cpd00067[c] + (1) cpd00119[c]	0,10000	Histidine metabolism
rxn00789	1-(5-Phospho-D-ribosyl)-ATP:pyrophosphate phosphoribosyl-transferase	2.4.2.17	sll0900	(1) ATP[c] + (1) PRPP[c] --> (1) PPi[c] + (1) Phosphoribosyl-ATP[c]	(1) cpd00002[c] + (1) cpd00103[c] --> (1) cpd00012[c] + (1) cpd01775[c]	0,10000	Histidine metabolism
rxn02853	Imidazole acetaldehyde:NAD+ oxidoreductase	1.2.1.3	slr0091	(1) H2O[c] + (1) NAD[c] + (1) Imidazole acetaldehyde[c] --> (1) NADH[c] + (2) H+[c] + (1) 4-Imidazoleacetate[c]	(1) cpd00001[c] + (1) cpd00003[c] + (1) cpd03052[c] --> (1) cpd00004[c] + (2) cpd00067[c] + (1) cpd01831[c]	0,10000	Histidine metabolism
rxn02473	D-erythro-1-(Imidazol-4-yl)glycerol 3-phosphate hydro-lyase	4.2.1.19	slr0500	(1) D-erythro-imidazole-glycerol-phosphate[c] --> (1) H2O[c] + (1) imidazole acetol-phosphate[c]	(1) cpd02843[c] --> (1) cpd00001[c] + (1) cpd00930[c]	0,10000	Histidine metabolism
rxn02834	Phosphoribosyl-ATP pyrophosphohydrolase	3.6.1.31	slr0608	(1) H2O[c] + (1) Phosphoribosyl-ATP[c] --> (1) PPi[c] + (1) Phosphoribosyl-AMP[c]	(1) cpd00001[c] + (1) cpd01775[c] --> (1) cpd00012[c] + (1) cpd01777[c]	0,10000	Histidine metabolism
rxn02835	1-(5-phospho-D-ribosyl)-AMP 1,6-hydrolase	3.5.4.19	slr0608	(1) H2O[c] + (1) Phosphoribosyl-AMP[c] --> (1) phosphoribosylformiminoaicar-phosphate[c]	(1) cpd00001[c] + (1) cpd01777[c] --> (1) cpd02979[c]	0,10000	Histidine metabolism
rxn03175	N-(5'-Phospho-D-ribosylformimino)-5-amino-1-	5.3.1.16	slr0652	(1) phosphoribosylformiminoaicar-phosphate[c] --> (1) phosphoribulosylformimino-AICAR-phosphate[c]	(1) cpd02979[c] --> (1) cpd02991[c]	0,10000	Histidine metabolism
rxn02160	L-Histidinol-phosphate phosphohydrolase	3.1.3.15		(1) H2O[c] + (1) L-histidinol-phosphate[c] --> (1) Phosphate[c] + (1) H+[c] + (1) L-Histidinol[c]	(1) cpd00001[c] + (1) cpd00807[c] --> (1) cpd00009[c] + (1) cpd00067[c] + (1) cpd00641[c]	0,10000	Histidine metabolism
rxn02159	L-Histidinol:NAD+ oxidoreductase	1.1.1.23	(slr0682 or slr1848)	(1) NAD[c] + (1) L-Histidinol[c] <=> (1) NADH[c] + (1) H+[c] + (1) L-Histidinal[c]	(1) cpd00003[c] + (1) cpd00641[c] <=> (1) cpd00004[c] + (1) cpd00067[c] + (1) cpd01324[c]	-10000,10000	Histidine metabolism
rxn00691	10-Formyltetrahydrofolate amidohydrolase	3.5.1.10	sll0070	(1) H2O[c] + (1) 10-Formyltetrahydrofolate[c] --> (1) Formate[c] + (1) H+[c] + (1) Tetrahydrofolate[c]	(1) cpd00001[c] + (1) cpd00201[c] --> (1) cpd00047[c] + (1) cpd00067[c] + (1) cpd00087[c]	0,10000	Glyoxylate and dicarboxylate metabolism, One carbon pool by folate
rxn00907	5,10-methylenetetrahydrofolate:NADP+ oxidoreductase	1.5.1.5	sll0753	(1) NADP[c] + (1) 5-10-Methylenetetrahydrofolate[c] --> (1) NADPH[c] + (1) 5-10-Methenyltetrahydrofolate[c]	(1) cpd00006[c] + (1) cpd00125[c] --> (1) cpd00005[c] + (1) cpd00347[c]	0,10000	Glyoxylate and dicarboxylate metabolism, One carbon pool by folate
rxn00690	Formate:tetrahydrofolate ligase (ADP-forming)	6.3.4.3		(1) ATP[c] + (1) Formate[c] + (1) Tetrahydrofolate[c] --> (1) ADP[c] + (1) Phosphate[c] + (1) 10-Formyltetrahydrofolate[c]	(1) cpd00002[c] + (1) cpd00047[c] + (1) cpd00087[c] --> (1) cpd00008[c] + (1) cpd00009[c] + (1) cpd00201[c]	0,10000	Glyoxylate and dicarboxylate metabolism, One carbon pool by folate
rxn01211	5,10-Methenyltetrahydrofolate 5-hydrolase(decyclizing)	3.5.4.9	sll0753	(1) H2O[c] + (1) 5-10-Methenyltetrahydrofolate[c] <=> (1) H+[c] + (1) 10-Formyltetrahydrofolate[c]	(1) cpd00001[c] + (1) cpd00347[c] <=> (1) cpd00067[c] + (1) cpd00201[c]	-10000,10000	Glyoxylate and dicarboxylate metabolism, One carbon pool by folate
rxn01011	D-Glycerate:NADP+ 2-oxidoreductase	1.1.1.81	(sll1908 or slr1556)	(1) NAD[c] + (1) Glycerate[c] --> (1) NADH[c] + (1) H+[c] + (1) Hydroxypyruvate[c]	(1) cpd00003[c] + (1) cpd00223[c] --> (1) cpd00004[c] + (1) cpd00067[c] + (1) cpd00145[c]	0,10000	Glyoxylate and dicarboxylate metabolism, Glycine,serine and threonine metabolism
rxn00973	citrate hydro-lyase	4.2.1.3	slr0665	(1) Citrate[c] <=> (1) Isocitrate[c]	(1) cpd00137[c] <=> (1) cpd00260[c]	-10000,10000	Glyoxylate and dicarboxylate metabolism, Citrate cycle (TCA cycle), Reductive carboxylate cycle (CO2 fixation)
rxn00256	Citrate oxaloacetate-lyase ((pro-3S)-CH2COO- -> acetyl-CoA)	2.3.3.1	sll0401	(1) H2O[c] + (1) Acetyl-CoA[c] + (1) Oxaloacetate[c] --> (1) CoA[c] + (1) H+[c] + (1) Citrate[c]	(1) cpd00001[c] + (1) cpd00022[c] + (1) cpd00032[c] --> (1) cpd00010[c] + (1) cpd00067[c] + (1) cpd00137[c]	0,10000	Glyoxylate and dicarboxylate metabolism, Citrate cycle (TCA cycle)
rxn00328	4-Hydroxy-2-oxoglutarate glyoxylate-lyase	4.1.2.14	sll0107	(1) 4-Hydroxy-2-oxoglutarate[c] <=> (1) Pyruvate[c] + (1) Glyoxalate[c]	(1) cpd00830[c] <=> (1) cpd00020[c] + (1) cpd00040[c]	-10000,10000	Glyoxylate and dicarboxylate metabolism, Arginine and proline metabolism
rxn00333	(S)-2-Hydroxy-acid:oxygen 2-oxidoreductase	1.1.3.15	((sll0404 or slr0806) and sll1189 and sll1831)	(1) O2[c] + (1) Glycolate[c] --> (1) H2O2[c] + (1) Glyoxalate[c]	(1) cpd00007[c] + (1) cpd00139[c] --> (1) cpd00025[c] + (1) cpd00040[c]	0,10000	Glyoxylate and dicarboxylate metabolism
rxn11933	Glycolate oxidase (nadh)	1.1.99.14	((sll0404 or slr0806) and sll1189 and sll1831)	(1) NAD[c] + (1) Glycolate[c] --> (1) H+[c] + (1) NADH[c] + (1) Glyoxalate[c]	(1) cpd00003[c] + (1) cpd00139[c] --> (1) cpd00067[c] + (1) cpd00004[c] + (1) cpd00040[c]	0,10000	Glyoxylate and dicarboxylate metabolism
rxn00980	2-Phosphoglycolate phosphohydrolase	3.1.3.18	(sll1349) or (slr0458)	(1) H2O[c] + (1) 2-Phosphoglycolate[c] --> (1) Phosphate[c] + (1) H+[c] + (1) Glycolate[c]	(1) cpd00001[c] + (1) cpd00727[c] --> (1) cpd00009[c] + (1) cpd00067[c] + (1) cpd00139[c]	0,10000	Glyoxylate and dicarboxylate metabolism
rxn00010	Glyoxylate carboxy-lyase (dimerizing)	4.1.1.47	(sll1981 and slr2088 and sll0065)	(2) Glyoxalate[c] + (1) H+[c] --> (1) CO2[c] + (1) Tartronate semialdehyde[c]	(2) cpd00040[c] + (1) cpd00067[c] --> (1) cpd00011[c] + (1) cpd00843[c]	0,10000	Glyoxylate and dicarboxylate metabolism
rxn02251	D-Ribulose 1,5-bisphosphate carboxy-lyase (dimerizing)	4.1.1.39	(slr0009) and (slr0012)	(1) O2[ca] + (1) D-Ribulose 1,5-bisphosphate[ca] --> (2) H+[ca] + (1) 3-Phosphoglycerate[ca] + (1) 2-Phosphoglycolate[ca]	(1) cpd00007[ca] + (1) cpd00871[ca] --> (2) cpd00067[ca] + (1) cpd00169[ca] + (1) cpd00727[ca]	0,10000	Glyoxylate and dicarboxylate metabolism
rxn00373	Oxalate carboxy-lyase	4.1.1.2	sll1358	(1) H+[c] + (1) Oxalate[c] --> (1) CO2[c] + (1) Formate[c]	(1) cpd00067[c] + (1) cpd00180[c] --> (1) cpd00011[c] + (1) cpd00047[c]	0,10000	Glyoxylate and dicarboxylate metabolism
rxn11978	Formate Dehydrogenase (ferrocytochrome c6) (periplasm)	1.2.2.1	sll1359	(2) Ferricytochrome c6[p] + (1) Formate[c] --> (1) H+[c] + (1) CO2[c] + (2) Ferrocytochrome c6[p]	(2) ficytc_6[p] + (1) cpd00047[c] --> (1) cpd00067[c] + (1) cpd00011[c] + (2) focytc_6[p]	0,10000	Glyoxylate and dicarboxylate metabolism
rxn00979	glycolaldehyde:NAD+ oxidoreductase	1.2.1.47	slr0091	(1) H2O[c] + (1) NAD[c] + (1) Glycolaldehyde[c] --> (1) NADH[c] + (2) H+[c] + (1) Glycolate[c]	(1) cpd00001[c] + (1) cpd00003[c] + (1) cpd00229[c] --> (1) cpd00004[c] + (2) cpd00067[c] + (1) cpd00139[c]	0,10000	Glyoxylate and dicarboxylate metabolism
rxn01280	(R)-Glycerate:NAD+ oxidoreductase	1.1.1.60	slr0229	(1) NAD[c] + (1) Glycerate[c] --> (1) NADH[c] + (1) H+[c] + (1) Tartronate semialdehyde[c]	(1) cpd00003[c] + (1) cpd00223[c] --> (1) cpd00004[c] + (1) cpd00067[c] + (1) cpd00843[c]	0,10000	Glyoxylate and dicarboxylate metabolism
rxn00325	Glyoxylate:oxygen oxidoreductase	1.2.3.5	sll1556	(1) H2O[c] + (1) O2[c] + (1) Glyoxalate[c] <=> (1) H2O2[c] + (1) H+[c] + (1) Oxalate[c]	(1) cpd00001[c] + (1) cpd00007[c] + (1) cpd00040[c] <=> (1) cpd00025[c] + (1) cpd00067[c] + (1) cpd00180[c]	-10000,10000	Glyoxylate and dicarboxylate metabolism
rxn00272	L-Alanine:glyoxylate aminotransferase	2.6.1.45	sll1559	(1) L-Alanine[c] + (1) Glyoxalate[c] <=> (1) Pyruvate[c] + (1) Glycine[c]	(1) cpd00035[c] + (1) cpd00040[c] <=> (1) cpd00020[c] + (1) cpd00033[c]	-10000,10000	Glyoxylate and Dicarboxylate Metabolism
rxn01169	ATP:D-glucose 6-phosphotransferase	2.7.1.1	sll0593	(1) ATP[c] + (1) beta-D-Glucose[c] --> (1) ADP[c] + (1) beta-D-Glucose 6-phosphate[c]	(1) cpd00002[c] + (1) cpd00190[c] --> (1) cpd00008[c] + (1) cpd00863[c]	0,10000	Glycolysis / Gluconeogenesis
rxn09502	Glucokinase	2.7.1.2	sll0593	(1) ATP[c] + (1) D-Glucose[c] --> (1) ADP[c] + (1) beta-D-Glucose 6-phosphate[c]	(1) cpd00002[c] + (1) cpd00027[c] --> (1) cpd00008[c] + (1) cpd00863[c]	0,10000	Glycolysis / Gluconeogenesis
rxn01106	2-Phospho-D-glycerate 2,3-phosphomutase	5.4.2.1	(slr1124) or (slr1945) or (slr0395)	(1) 2-Phospho-D-glycerate[c] <=> (1) 3-Phosphoglycerate[c]	(1) cpd00482[c] <=> (1) cpd00169[c]	-10000,10000	Glycolysis / Gluconeogenesis
rxn00459	2-Phospho-D-glycerate hydro-lyase	4.2.1.11	slr0752	(1) 2-Phospho-D-glycerate[c] <=> (1) H2O[c] + (1) Phosphoenolpyruvate[c]	(1) cpd00482[c] <=> (1) cpd00001[c] + (1) cpd00061[c]	-10000,10000	Glycolysis / Gluconeogenesis
rxn02936	3-Phospho-D-erythronate hydro-lyase	4.2.1.11	slr0752	(1) 3-Phospho-D-erythronate[c] <=> (1) H2O[c] + (1) Phosphoenol-4-deoxy-3-tetrulosonate[c]	(1) cpd02132[c] <=> (1) cpd00001[c] + (1) cpd02645[c]	-10000,10000	Glycolysis / Gluconeogenesis
rxn00536	Ethanol:NADP+ oxidoreductase	1.1.1.2	slr0942	(1) NADP[c] + (1) Ethanol[c] <=> (1) NADPH[c] + (1) H+[c] + (1) Acetaldehyde[c]	(1) cpd00006[c] + (1) cpd00363[c] <=> (1) cpd00005[c] + (1) cpd00067[c] + (1) cpd00071[c]	-10000,10000	Glycolysis / Gluconeogenesis
rxn02380	beta-D-Glucose 6-phosphate ketol-isomerase	5.3.1.9	slr1349	(1) beta-D-Glucose 6-phosphate[c] <=> (1) D-fructose-6-phosphate[c]	(1) cpd00863[c] <=> (1) cpd00072[c]	-10000,10000	Glycolysis / Gluconeogenesis
rxn01216	3-Phospho-D-glyceroyl phosphate 2,3-phosphomutase		slr1945	(1) 1,3-Bisphospho-D-glycerate[c] <=> (1) H+[c] + (1) DPG[c]	(1) cpd00203[c] <=> (1) cpd00067[c] + (1) cpd00853[c]	-10000,10000	Glycolysis / Gluconeogenesis
rxn01069	O-Phospho-L-homoserine phospho-lyase (adding water)	4.2.3.1	(sll1172) or (sll1688)	(1) H2O[c] + (1) O-Phospho-L-homoserine[c] --> (1) Phosphate[c] + (1) H+[c] + (1) L-Threonine[c]	(1) cpd00001[c] + (1) cpd00809[c] --> (1) cpd00009[c] + (1) cpd00067[c] + (1) cpd00161[c]	0,10000	Glycine,serine and threonine metabolism
rxn01300	ATP:L-homoserine O-phosphotransferase	2.7.1.39	sll1760	(1) ATP[c] + (1) L-Homoserine[c] --> (1) ADP[c] + (1) O-Phospho-L-homoserine[c]	(1) cpd00002[c] + (1) cpd00227[c] --> (1) cpd00008[c] + (1) cpd00809[c]	0,10000	Glycine,serine and threonine metabolism
rxn01101	3-Phospho-D-glycerate:NAD+ 2-oxidoreductase	1.1.1.95	sll1908	(1) NAD[c] + (1) 3-Phosphoglycerate[c] --> (1) NADH[c] + (1) H+[c] + (1) 3-Phosphonooxypyruvate[c]	(1) cpd00003[c] + (1) cpd00169[c] --> (1) cpd00004[c] + (1) cpd00067[c] + (1) cpd02069[c]	0,10000	Glycine,serine and threonine metabolism
rxn06377	glycine cleavage system	1.4.4.2	slr0293 and slr0879	(1) Glycine[c] + (1) H+[c] + (1) Lipoylprotein[c] --> (1) CO2[c] + (1) S-Aminomethyldihydrolipoylprotein[c]	(1) cpd00033[c] + (1) cpd00067[c] + (1) cpd12005[c] --> (1) cpd00011[c] + (1) cpd11830[c]	0,10000	Glycine,serine and threonine metabolism
rxn00165	L-serine ammonia-lyase	4.3.1.19	slr2072	(1) L-Serine[c] --> (1) NH3[c] + (1) Pyruvate[c]	(1) cpd00054[c] --> (1) cpd00013[c] + (1) cpd00020[c]	0,10000	Glycine,serine and threonine metabolism
rxn00424	L-Serine:glyoxylate aminotransferase	2.6.1.45	sll1559	(1) Glyoxalate[c] + (1) L-Serine[c] <=> (1) Glycine[c] + (1) Hydroxypyruvate[c]	(1) cpd00040[c] + (1) cpd00054[c] <=> (1) cpd00033[c] + (1) cpd00145[c]	-10000,10000	Glycine,serine and threonine metabolism
rxn06493	dihydrolipoylprotein:NAD+ oxidoreductase	1.8.1.4	slr1096	(1) NAD[c] + (1) Dihydrolipolprotein[c] <=> (1) NADH[c] + (1) H+[c] + (1) Lipoylprotein[c]	(1) cpd00003[c] + (1) cpd12225[c] <=> (1) cpd00004[c] + (1) cpd00067[c] + (1) cpd12005[c]	-10000,10000	Glycine,serine and threonine metabolism
rxn09499	glycine-cleavage complex (lipoamide), mitochondrial	1.4.4.2	slr0293 and slr0879	(1) Glycine[c] + (1) H+[c] + (1) Lipoamide[c] <=> (1) CO2[c] + (1) S-aminomethyldihydrolipoamide[c]	(1) cpd00033[c] + (1) cpd00067[c] + (1) cpd00213[c] <=> (1) cpd00011[c] + (1) cpd15217[c]	-10000,10000	Glycine, Serine, and Threonine Metabolism
rxn11676	acetyl-phosphate ammonia:thioredoxin disulfide	1.21.4.2		(1) H2O[c] + (1) NH3[c] + (1) Acetylphosphate[c] + (1) Oxidized thioredoxin[c] <=> (1) Phosphate[c] + (1) Glycine[c] + (2) H+[c] + (1) Reduced thioredoxin[c]	(1) cpd00001[c] + (1) cpd00013[c] + (1) cpd00196[c] + (1) cpd11420[c] <=> (1) cpd00009[c] + (1) cpd00033[c] + (2) cpd00067[c] + (1) cpd11421[c]	-10000,10000	Glycine, Serine, and Threonine Metabolism
rxn00198	Isocitrate:NADP+ oxidoreductase (decarboxylating)	1.1.1.42	slr1289	(1) NADP[c] + (1) Isocitrate[c] --> (1) NADPH[c] + (1) CO2[c] + (1) 2-Oxoglutarate[c]	(1) cpd00006[c] + (1) cpd00260[c] --> (1) cpd00005[c] + (1) cpd00011[c] + (1) cpd00024[c]	0,10000	Glutathione metabolism, Reductive carboxylate cycle (CO2 fixation)
rxn01115	6-Phospho-D-gluconate:NADP+ 2-oxidoreductase (decarboxylating)	1.1.1.44	sll0329	(1) NADP[c] + (1) 6-Phospho-D-gluconate[c] --> (1) NADPH[c] + (1) CO2[c] + (1) D-Ribulose5-phosphate[c]	(1) cpd00006[c] + (1) cpd00284[c] --> (1) cpd00005[c] + (1) cpd00011[c] + (1) cpd00171[c]	0,10000	Glutathione metabolism, Pentose phosphate pathway
rxn01975	beta-D-Glucose-6-phosphate:NADP+ 1-oxoreductase	1.1.1.49	slr1843	(1) NADP[c] + (1) beta-D-Glucose 6-phosphate[c] --> (1) NADPH[c] + (1) H+[c] + (1) 6-phospho-D-glucono-1-5-lactone[c]	(1) cpd00006[c] + (1) cpd00863[c] --> (1) cpd00005[c] + (1) cpd00067[c] + (1) cpd00911[c]	0,10000	Glutathione metabolism, Pentose phosphate pathway
rxn01406	S-Adenosylmethioninamine:putrescine 3-aminopropyltransferase	2.5.1.16		(1) Putrescine[c] + (1) S-Adenosylmethioninamine[c] --> (1) H+[c] + (1) 5-Methylthioadenosine[c] + (1) Spermidine[c]	(1) cpd00118[c] + (1) cpd00837[c] --> (1) cpd00067[c] + (1) cpd00147[c] + (1) cpd00264[c]	0,10000	Glutathione metabolism, Methionine metabolism, Urea cycle and metabolism of amino groups
rxn00205	Glutathione:hydrogen-peroxide oxidoreductase	1.11.1.9	(slr1992 or slr1171)	(1) H2O2[c] + (2) Glutathione[c] --> (2) H2O[c] + (1) Oxidized glutathione[c]	(1) cpd00025[c] + (2) cpd00042[c] --> (2) cpd00001[c] + (1) cpd00111[c]	0,10000	Glutathione metabolism
rxn00351	gamma-L-Glutamyl-L-cysteine:glycine ligase (ADP-forming)	6.3.2.3	slr1238	(1) ATP[c] + (1) Glycine[c] + (1) gamma-Glutamylcysteine[c] --> (1) ADP[c] + (1) Phosphate[c] + (1) Glutathione[c] + (1) H+[c]	(1) cpd00002[c] + (1) cpd00033[c] + (1) cpd00506[c] --> (1) cpd00008[c] + (1) cpd00009[c] + (1) cpd00042[c] + (1) cpd00067[c]	0,10000	Glutathione metabolism
rxn00350	glutathione hydralase (periplasmic)	2.3.2.2	slr1269	(1) H2O[c] + (1) Glutathione[c] --> (1) L-Glutamate[c] + (1) L-Cysteinylglycine[c]	(1) cpd00001[c] + (1) cpd00042[c] --> (1) cpd00023[c] + (1) cpd01017[c]	0,10000	Glutathione metabolism
rxn00646	L-Glutamate:L-cysteine gamma-ligase (ADP-forming)	6.3.2.2	slr1269	(1) ATP[c] + (1) L-Glutamate[c] + (1) L-Cysteine[c] --> (1) ADP[c] + (1) Phosphate[c] + (1) H+[c] + (1) gamma-Glutamylcysteine[c]	(1) cpd00002[c] + (1) cpd00023[c] + (1) cpd00084[c] --> (1) cpd00008[c] + (1) cpd00009[c] + (1) cpd00067[c] + (1) cpd00506[c]	0,10000	Glutathione metabolism
rxn00650	membrane alanyl aminopeptidase	3.4.11.1	sll1343 and sll2001 and slr0918 and slr0786 and sll0555	(1) H2O[c] + (1) L-Cysteinylglycine[c] <=> (1) Glycine[c] + (1) L-Cysteine[c]	(1) cpd00001[c] + (1) cpd01017[c] <=> (1) cpd00033[c] + (1) cpd00084[c]	-10000,10000	Glutathione metabolism
rxn00414	Carbon-dioxide:L-glutamine amido-ligase (ADP-forming,	6.3.5.5	sll1498 and sll0370	(1) H2O[c] + (2) ATP[c] + (1) L-Glutamine[c] + (1) Bicarbonate[c] --> (2) ADP[c] + (1) Phosphate[c] + (1) L-Glutamate[c] + (1) H+[c] + (1) Carbamoylphosphate[c]	(1) cpd00001[c] + (2) cpd00002[c] + (1) cpd00053[c] + (1) cpd00242[c] --> (2) cpd00008[c] + (1) cpd00009[c] + (1) cpd00023[c] + (1) cpd00067[c] + (1) cpd00146[c]	0,10000	Glutamate metabolism, Pyrimidine metabolism
rxn00790	5-Phosphoribosylamine:pyrophosphate phosphoribosyltransferase	2.4.2.14	sll0757	(1) H2O[c] + (1) L-Glutamine[c] + (1) PRPP[c] --> (1) PPi[c] + (1) L-Glutamate[c] + (1) 5-Phosphoribosylamine[c]	(1) cpd00001[c] + (1) cpd00053[c] + (1) cpd00103[c] --> (1) cpd00012[c] + (1) cpd00023[c] + (1) cpd01982[c]	0,10000	Glutamate metabolism, Purine metabolism
rxn00917	Xanthosine-5'-phosphate:L-glutamine amido-ligase (AMP-forming)	6.3.5.2	slr0213	(1) H2O[c] + (1) ATP[c] + (1) L-Glutamine[c] + (1) XMP[c] --> (1) PPi[c] + (1) AMP[c] + (1) L-Glutamate[c] + (1) H+[c] + (1) GMP[c]	(1) cpd00001[c] + (1) cpd00002[c] + (1) cpd00053[c] + (1) cpd00497[c] --> (1) cpd00012[c] + (1) cpd00018[c] + (1) cpd00023[c] + (1) cpd00067[c] + (1) cpd00126[c]	0,10000	Glutamate metabolism, Purine metabolism
rxn00069	L-glutamate:NAD+ oxidoreductase (transaminating)	1.4.1.14	(sll1502 and sll1027)	(1) NADH[c] + (1) 2-Oxoglutarate[c] + (1) L-Glutamine[c] + (1) H+[c] --> (1) NAD[c] + (2) L-Glutamate[c]	(1) cpd00004[c] + (1) cpd00024[c] + (1) cpd00053[c] + (1) cpd00067[c] --> (1) cpd00003[c] + (2) cpd00023[c]	0,10000	Glutamate metabolism, Nitrogen metabolism
rxn00187	L-Glutamate:ammonia ligase (ADP-forming)	6.3.1.2	(slr0288 or slr1756)	(1) ATP[c] + (1) NH3[c] + (1) L-Glutamate[c] --> (1) ADP[c] + (1) Phosphate[c] + (1) L-Glutamine[c] + (1) H+[c]	(1) cpd00002[c] + (1) cpd00013[c] + (1) cpd00023[c] --> (1) cpd00008[c] + (1) cpd00009[c] + (1) cpd00053[c] + (1) cpd00067[c]	0,10000	Glutamate metabolism, Nitrogen metabolism
rxn00260	L-Aspartate:2-oxoglutarate aminotransferase	2.6.1.1	(sll0402 or slr0036)	(1) 2-Oxoglutarate[c] + (1) L-Aspartate[c] <=> (1) L-Glutamate[c] + (1) Oxaloacetate[c]	(1) cpd00024[c] + (1) cpd00041[c] <=> (1) cpd00023[c] + (1) cpd00032[c]	-10000,10000	Glutamate metabolism, Carbon fixation in photosynthetic organisms, Alanine and aspartate metabolism
rxn00503	L-1-Pyrroline-5-carboxylate:NAD+ oxidoreductase	1.5.1.12	sll1561	(2) H2O[c] + (1) NAD[c] + (1) 1-Pyrroline-5-carboxylate[c] --> (1) NADH[c] + (1) L-Glutamate[c] + (1) H+[c]	(2) cpd00001[c] + (1) cpd00003[c] + (1) cpd02431[c] --> (1) cpd00004[c] + (1) cpd00023[c] + (1) cpd00067[c]	0,10000	Glutamate metabolism, Arginine and proline metabolism
rxn00555	L-Glutamine:D-fructose-6-phosphate aminotransferase (hexose	2.6.1.16	sll0220	(1) L-Glutamine[c] + (1) D-fructose-6-phosphate[c] --> (1) L-Glutamate[c] + (1) D-Glucosamine phosphate[c]	(1) cpd00053[c] + (1) cpd00072[c] --> (1) cpd00023[c] + (1) cpd00288[c]	0,10000	Glutamate metabolism, Aminosugars metabolism
rxn06937	L-Glutamate:tRNA(Glu) ligase (AMP-forming)	6.1.1.17	sll0179	(1) ATP[c] + (1) L-Glutamate[c] + (1) H+[c] + (1) tRNA-Glu[c] --> (1) PPi[c] + (1) AMP[c] + (1) L-Glutamyl-tRNA-Glu[c]	(1) cpd00002[c] + (1) cpd00023[c] + (1) cpd00067[c] + (1) cpd11912[c] --> (1) cpd00012[c] + (1) cpd00018[c] + (1) cpd12227[c]	0,10000	Glutamate metabolism, Aminoacyl-tRNA biosynthesis, Porphyrin and chlorophyll metabolism
rxn06520	Glu-tRNA(Gln):L-glutamine amido-ligase(ADP-forming)	6.3.5.7	(slr0877 and sll1435 and slr0033)	(1) ATP[c] + (1) L-Glutamine[c] + (1) L-Glutamyl-tRNA(Gln)[c] --> (1) ADP[c] + (1) Phosphate[c] + (1) L-Glutamate[c] + (1) Gln-tRNA(Gln)[c]	(1) cpd00002[c] + (1) cpd00053[c] + (1) cpd12828[c] --> (1) cpd00008[c] + (1) cpd00009[c] + (1) cpd00023[c] + (1) cpd12060[c]	0,10000	Glutamate metabolism, Aminoacyl-tRNA biosynthesis
rxn06437	L-Glutamine:tRNA(Gln) ligase (AMP-forming)	6.1.1.18	sll0179	(1) ATP[c] + (1) L-Glutamine[c] + (1) H+[c] + (1) tRNA(Gln)[c] --> (1) PPi[c] + (1) AMP[c] + (1) Gln-tRNA(Gln)[c]	(1) cpd00002[c] + (1) cpd00053[c] + (1) cpd00067[c] + (1) cpd11911[c] --> (1) cpd00012[c] + (1) cpd00018[c] + (1) cpd12060[c]	0,10000	Glutamate metabolism
rxn06436	L-Glutamate:tRNA(Gln) ligase (AMP-forming)	6.1.1.24	sll0179	(1) ATP[c] + (1) L-Glutamate[c] + (1) tRNA(Gln)[c] <=> (1) PPi[c] + (1) AMP[c] + (1) L-Glutamyl-tRNA(Gln)[c]	(1) cpd00002[c] + (1) cpd00023[c] + (1) cpd11911[c] <=> (1) cpd00012[c] + (1) cpd00018[c] + (1) cpd12828[c]	-10000,10000	Glutamate Metabolism
rxn00214	UDPglucose 4-epimerase	5.1.3.2	(sll0244 or slr1067 or slr1078)	(1) UDP-glucose[c] <=> (1) UDP-galactose[c]	(1) cpd00026[c] <=> (1) cpd00043[c]	-10000,10000	Galactose metabolism, Nucleotide sugars metabolism
rxn02314	ATP:D-tagatose-6-phosphate 1-phosphotransferase	2.7.1.11	sll1196	(1) ATP[c] + (1) D-Tagatose 6-phosphate[c] --> (1) ADP[c] + (1) D-Tagatose 1,6-biphosphate[c]	(1) cpd00002[c] + (1) cpd00805[c] --> (1) cpd00008[c] + (1) cpd02371[c]	0,10000	Galactose metabolism
rxn00642	GDPmannose 4,6-hydro-lyase	4.2.1.47	(sll1212 or slr1072)	(1) GDP-mannose[c] --> (1) H2O[c] + (1) GDP-4-dehydro-D-rhamnose[c]	(1) cpd00083[c] --> (1) cpd00001[c] + (1) cpd00900[c]	0,10000	Fructose and mannose metabolism
rxn00640	GDP:D-mannose-1-phosphate guanylyltransferase	2.7.7.22	(sll1370 or slr0493 or slr2074)	(1) GDP[c] + (1) D-Mannose 1-phosphate[c] --> (1) Phosphate[c] + (1) H+[c] + (1) GDP-mannose[c]	(1) cpd00031[c] + (1) cpd00485[c] --> (1) cpd00009[c] + (1) cpd00067[c] + (1) cpd00083[c]	0,10000	Fructose and mannose metabolism
rxn00641	GTP:alpha-D-mannose-1-phosphate guanylyltransferase	2.7.7.13	(sll1496 or sll1558)	(1) GTP[c] + (1) D-Mannose 1-phosphate[c] --> (1) PPi[c] + (1) GDP-mannose[c]	(1) cpd00038[c] + (1) cpd00485[c] --> (1) cpd00012[c] + (1) cpd00083[c]	0,10000	Fructose and mannose metabolism
rxn01329	D-Mannose 6-phosphate 1,6-phosphomutase	5.4.2.8	(sll1496 or slr1334)	(1) D-mannose-6-phosphate[c] <=> (1) D-Mannose 1-phosphate[c]	(1) cpd00235[c] <=> (1) cpd00485[c]	-10000,10000	Fructose and mannose metabolism
rxn01870	D-Fructose 1-phosphate D-glyceraldehyde-3-phosphate-lyase	4.1.2.13	sll0018	(1) D-fructose-1-phosphate[c] <=> (1) Glycerone-phosphate[c] + (1) D-Glyceraldehyde[c]	(1) cpd00802[c] <=> (1) cpd00095[c] + (1) cpd00448[c]	-10000,10000	Fructose and mannose metabolism
rxn03962	GDP-L-fucose:NADP+ 4-oxidoreductase (3,5-epimerizing)	1.1.1.271	sll1213	(1) NADP[c] + (1) GDP-L-fucose[c] <=> (1) NADPH[c] + (1) H+[c] + (1) GDP-4-dehydro-D-rhamnose[c]	(1) cpd00006[c] + (1) cpd00272[c] <=> (1) cpd00005[c] + (1) cpd00067[c] + (1) cpd00900[c]	-10000,10000	Fructose and mannose metabolism
rxn00559	D-Mannose-6-phosphate ketol-isomerase	5.4.2.8	slr0493	(1) D-mannose-6-phosphate[c] <=> (1) D-fructose-6-phosphate[c]	(1) cpd00235[c] <=> (1) cpd00072[c]	-10000,10000	Fructose and mannose metabolism
rxn09498	glycine-cleavage system (lipoamide) irreversible, mitochondrial	2.1.2.10	sll0171	(1) Tetrahydrofolate[c] + (1) S-aminomethyldihydrolipoamide[c] --> (1) NH3[c] + (1) 5-10-Methylenetetrahydrofolate[c] + (1) Dihydrolipoamide[c]	(1) cpd00087[c] + (1) cpd15217[c] --> (1) cpd00013[c] + (1) cpd00125[c] + (1) cpd00449[c]	0,10000	Folate Metabolism
rxn00909	5-Methyltetrahyfrofolate:(acceptor) oxidoreductase	1.5.1.20	slr2141	(1) 5-10-Methylenetetrahydrofolate[c] + (1) FADH2[c] <=> (1) FAD[c] + (1) 5-Methyltetrahydrofolate[c]	(1) cpd00125[c] + (1) cpd00982[c] <=> (1) cpd00015[c] + (1) cpd00345[c]	-10000,10000	Folate Metabolism
rxn00686	5,6,7,8-Tetrahydrofolate:NADP+ oxidoreductase	1.5.1.3		(1) NADP[c] + (1) Tetrahydrofolate[c] <=> (1) NADPH[c] + (1) H+[c] + (1) Dihydrofolate[c]	(1) cpd00006[c] + (1) cpd00087[c] <=> (1) cpd00005[c] + (1) cpd00067[c] + (1) cpd00330[c]	-10000,10000	Folate biosynthesis, One carbon pool by folate
rxn02986	2-Amino-4-hydroxy-6-(erythro-1,2,3-trihydroxypropyl)	4.2.3.12	sll1612	(1) 7,8-Dihydroneopterin 3'-triphosphate[c] --> (1) H+[c] + (1) Triphosphate[c] + (1) 6-Pyruvoyltetrahydropterin[c]	(1) cpd02978[c] --> (1) cpd00067[c] + (1) cpd00421[c] + (1) cpd02315[c]	0,10000	Folate biosynthesis
rxn00299	GTP 7,8-8,9-dihydrolase	3.5.4.16	slr0426	(1) H2O[c] + (1) GTP[c] --> (1) Formate[c] + (1) H+[c] + (1) 7,8-Dihydroneopterin 3'-triphosphate[c]	(1) cpd00001[c] + (1) cpd00038[c] --> (1) cpd00047[c] + (1) cpd00067[c] + (1) cpd02978[c]	0,10000	Folate biosynthesis
rxn03841	4-amino-4-deoxychorismate pyruvate-lyase	4.1.3.38	slr0887	(1) ADC[c] --> (1) Pyruvate[c] + (1) H+[c] + (1) 4-Aminobenzoate[c]	(1) cpd08210[c] --> (1) cpd00020[c] + (1) cpd00067[c] + (1) cpd00443[c]	0,10000	Folate biosynthesis
rxn02201	2-Amino-4-hydroxy-6-hydroxymethyl-7,8-dihydropteridine-	2.5.1.15	slr1093	(1) 4-Aminobenzoate[c] + (1) 7,8-Dihydropterin pyrophosphate[c] --> (1) PPi[c] + (1) Dihydropteroate[c]	(1) cpd00443[c] + (1) cpd02920[c] --> (1) cpd00012[c] + (1) cpd00683[c]	0,10000	Folate biosynthesis
rxn02503	ATP:2-amino-4-hydroxy-6-hydroxymethyl-7,8-dihydropteridine	2.7.6.3	slr1093	(1) ATP[c] + (1) 6-hydroxymethyl dihydropterin[c] --> (1) AMP[c] + (1) 7,8-Dihydropterin pyrophosphate[c]	(1) cpd00002[c] + (1) cpd00954[c] --> (1) cpd00018[c] + (1) cpd02920[c]	0,10000	Folate biosynthesis
rxn02504	2-Amino-4-hydroxy-6-(D-erythro-1,2,3-trihydroxypropyl)-7,8-	4.1.2.25	slr1626	(1) Dihydroneopterin[c] --> (1) Glycolaldehyde[c] + (1) 6-hydroxymethyl dihydropterin[c]	(1) cpd02961[c] --> (1) cpd00229[c] + (1) cpd00954[c]	0,10000	Folate biosynthesis
rxn01603	7,8-dihydropteroate:L-glutamate ligase (ADP-forming)	6.3.2.12	slr2026	(1) ATP[c] + (1) L-Glutamate[c] + (1) Dihydropteroate[c] --> (1) ADP[c] + (1) Phosphate[c] + (1) H+[c] + (1) Dihydrofolate[c]	(1) cpd00002[c] + (1) cpd00023[c] + (1) cpd00683[c] --> (1) cpd00008[c] + (1) cpd00009[c] + (1) cpd00067[c] + (1) cpd00330[c]	0,10000	Folate biosynthesis
rxn01257	chorismate:L-glutamine aminotransferase	2.6.1.85		(1) L-Glutamine[c] + (1) Chorismate[c] --> (1) L-Glutamate[c] + (1) ADC[c]	(1) cpd00053[c] + (1) cpd00216[c] --> (1) cpd00023[c] + (1) cpd08210[c]	0,10000	Folate biosynthesis
rxn03168	Dihydroneopterin monophosphate dephosphorylase			(1) H2O[c] + (1) Dihydroneopterin phosphate[c] --> (1) Phosphate[c] + (1) Dihydroneopterin[c] + (1) H+[c]	(1) cpd00001[c] + (1) cpd03521[c] --> (1) cpd00009[c] + (1) cpd02961[c] + (1) cpd00067[c]	0,10000	Folate biosynthesis
rxn03173	Dihydroneopterin triphosphate pyrophosphatase	3.1.3.1		(1) H2O[c] + (1) 7,8-Dihydroneopterin 3'-triphosphate[c] --> (1) PPi[c] + (1) Dihydroneopterin phosphate[c]	(1) cpd00001[c] + (1) cpd02978[c] --> (1) cpd00012[c] + (1) cpd03521[c]	0,10000	Folate biosynthesis
rxn01314	NADPH:6,7-dihydropteridine oxidoreductase	1.5.1.34	slr1920	(1) NADPH[c] + (1) H+[c] + (1) Dihydrobiopterin[c] <=> (1) NADP[c] + (1) Tetrahydrobiopterin[c]	(1) cpd00005[c] + (1) cpd00067[c] + (1) cpd00231[c] <=> (1) cpd00006[c] + (1) cpd00233[c]	-10000,10000	Folate biosynthesis
rxn02200	2-Amino-4-hydroxy-6-hydroxymethyl-7,8-dihydropteridine:4-	2.5.1.15	slr2026	(1) 4-Aminobenzoate[c] + (1) 6-hydroxymethyl dihydropterin[c] <=> (1) H2O[c] + (1) Dihydropteroate[c]	(1) cpd00443[c] + (1) cpd00954[c] <=> (1) cpd00001[c] + (1) cpd00683[c]	-10000,10000	Folate biosynthesis
rxn03840	PABB	Undetermined		(1) NH3[c] + (1) Chorismate[c] <=> (1) H2O[c] + (1) ADC[c]	(1) cpd00013[c] + (1) cpd00216[c] <=> (1) cpd00001[c] + (1) cpd08210[c]	-10000,10000	Folate biosynthesis
rxn05457	tetradecanoyl-ACP:[acyl-carrier-protein] transferase	2.3.1.1	sll1883	(1) CoA[c] + (1) Tetradecanoyl-[acyl-carrier protein][c] <=> (1) Myristoyl-CoA[c] + (1) ACP[c]	(1) cpd00010[c] + (1) cpd11466[c] <=> (1) cpd01695[c] + (1) cpd11493[c]	-10000,10000	Fatty Acid Synthesis
rxn09457	Oleoyl-CoA desaturase (n-C18:1CoA -> n-C18:2CoA)	1.14.19.1	sll0541	(1) NADPH[c] + (1) O2[c] + (1) H+[c] + (1) Octadecenoyl-CoA[c] --> (2) H2O[c] + (1) NADP[c] + (1) Octadecynoyl-CoA[c]	(1) cpd00005[c] + (1) cpd00007[c] + (1) cpd00067[c] + (1) cpd15274[c] --> (2) cpd00001[c] + (1) cpd00006[c] + (1) cpd15272[c]	0,10000	Fatty acid metabolism
rxn09458	stearoyl-CoA desaturase (n-C18:0CoA -> n-C18:1CoA)	1.14.19.1	sll0541	(1) NADPH[c] + (1) O2[c] + (1) H+[c] + (1) Stearyl-CoA[c] --> (2) H2O[c] + (1) NADP[c] + (1) Octadecenoyl-CoA[c]	(1) cpd00005[c] + (1) cpd00007[c] + (1) cpd00067[c] + (1) cpd00327[c] --> (2) cpd00001[c] + (1) cpd00006[c] + (1) cpd15274[c]	0,10000	Fatty acid metabolism
rxn09459	Palmitoyl-CoA desaturase (n-C16:0CoA -> n-C16:1CoA)	1.14.19.1	sll0541	(1) NADPH[c] + (1) O2[c] + (1) H+[c] + (1) Palmitoyl-CoA[c] --> (2) H2O[c] + (1) NADP[c] + (1) Hexadecenoyl-CoA[c]	(1) cpd00005[c] + (1) cpd00007[c] + (1) cpd00067[c] + (1) cpd00134[c] --> (2) cpd00001[c] + (1) cpd00006[c] + (1) cpd15238[c]	0,10000	Fatty acid metabolism
rxn09460	Myristicoyl-CoA desaturase (n-C14:0CoA -> n-C14:1CoA)	1.14.19.1	sll0541	(1) NADPH[c] + (1) O2[c] + (1) H+[c] + (1) Myristoyl-CoA[c] --> (2) H2O[c] + (1) NADP[c] + (1) Tetradecenoyl-CoA[c]	(1) cpd00005[c] + (1) cpd00007[c] + (1) cpd00067[c] + (1) cpd01695[c] --> (2) cpd00001[c] + (1) cpd00006[c] + (1) cpd15295[c]	0,10000	Fatty acid metabolism
rxn00947	Palmitate:CoA ligase (AMP-forming)	6.2.1.3	slr1609	(1) ATP[c] + (1) CoA[c] + (1) H+[c] + (1) Hexadecanoate[c] --> (1) PPi[c] + (1) AMP[c] + (1) Palmitoyl-CoA[c]	(1) cpd00002[c] + (1) cpd00010[c] + (1) cpd00067[c] + (1) cpd00214[c] --> (1) cpd00012[c] + (1) cpd00018[c] + (1) cpd00134[c]	0,10000	Fatty acid metabolism
rxn05736	fatty-acid--CoA ligase (tetradecanoate)	6.2.1.3	slr1609	(1) ATP[c] + (1) CoA[c] + (1) H+[c] + (1) Tetradecanoate[c] --> (1) PPi[c] + (1) AMP[c] + (1) Myristoyl-CoA[c]	(1) cpd00002[c] + (1) cpd00010[c] + (1) cpd00067[c] + (1) cpd03847[c] --> (1) cpd00012[c] + (1) cpd00018[c] + (1) cpd01695[c]	0,10000	Fatty acid metabolism
rxn09444	fatty-acid--CoA ligase (octanoate), peroxisomal	6.2.1.3	slr1609	(1) ATP[c] + (1) CoA[c] + (1) H+[c] + (1) octanoate[c] --> (1) PPi[c] + (1) AMP[c] + (1) Octanoyl-CoA[c]	(1) cpd00002[c] + (1) cpd00010[c] + (1) cpd00067[c] + (1) cpd03846[c] --> (1) cpd00012[c] + (1) cpd00018[c] + (1) cpd01335[c]	0,10000	Fatty acid metabolism
rxn09445	fatty-acid--CoA ligase (n-C26:0), peroxisomal	6.2.1.3	slr1609	(1) ATP[c] + (1) CoA[c] + (1) H+[c] + (1) hexacosanoate[c] --> (1) PPi[c] + (1) AMP[c] + (1) Hexacosanoyl-CoA[c]	(1) cpd00002[c] + (1) cpd00010[c] + (1) cpd00067[c] + (1) cpd15240[c] --> (1) cpd00012[c] + (1) cpd00018[c] + (1) cpd15241[c]	0,10000	Fatty acid metabolism
rxn09446	fatty-acid--CoA ligase (n-C24:0), peroxisomal	6.2.1.3	slr1609	(1) ATP[c] + (1) CoA[c] + (1) H+[c] + (1) tetracosanoate[c] --> (1) PPi[c] + (1) AMP[c] + (1) Lignoceroyl-CoA[c]	(1) cpd00002[c] + (1) cpd00010[c] + (1) cpd00067[c] + (1) cpd05235[c] --> (1) cpd00012[c] + (1) cpd00018[c] + (1) cpd15297[c]	0,10000	Fatty acid metabolism
rxn09447	fatty-acid--CoA ligase (octadecynoate)	6.2.1.3	slr1609	(1) ATP[c] + (1) CoA[c] + (1) H+[c] + (1) octadecynoate[c] --> (1) PPi[c] + (1) AMP[c] + (1) Octadecynoyl-CoA[c]	(1) cpd00002[c] + (1) cpd00010[c] + (1) cpd00067[c] + (1) cpd15270[c] --> (1) cpd00012[c] + (1) cpd00018[c] + (1) cpd15272[c]	0,10000	Fatty acid metabolism
rxn09448	fatty-acid--CoA ligase (octadecenoate)	6.2.1.3	slr1609	(1) ATP[c] + (1) CoA[c] + (1) H+[c] + (1) octadecenoate[c] --> (1) PPi[c] + (1) AMP[c] + (1) Octadecenoyl-CoA[c]	(1) cpd00002[c] + (1) cpd00010[c] + (1) cpd00067[c] + (1) cpd15269[c] --> (1) cpd00012[c] + (1) cpd00018[c] + (1) cpd15274[c]	0,10000	Fatty acid metabolism
rxn09449	fatty-acid--CoA ligase (octadecanoate)	6.2.1.3	slr1609	(1) ATP[c] + (1) CoA[c] + (1) H+[c] + (1) octadecanoate (n-C18:0)[c] --> (1) PPi[c] + (1) AMP[c] + (1) Stearyl-CoA[c]	(1) cpd00002[c] + (1) cpd00010[c] + (1) cpd00067[c] + (1) cpd01080[c] --> (1) cpd00012[c] + (1) cpd00018[c] + (1) cpd00327[c]	0,10000	Fatty acid metabolism
rxn09450	fatty-acid--CoA ligase (hexadecenoate), peroxisomal	6.2.1.3	slr1609	(1) ATP[c] + (1) CoA[c] + (1) H+[c] + (1) hexadecenoate[c] --> (1) PPi[c] + (1) AMP[c] + (1) Hexadecenoyl-CoA[c]	(1) cpd00002[c] + (1) cpd00010[c] + (1) cpd00067[c] + (1) cpd15237[c] --> (1) cpd00012[c] + (1) cpd00018[c] + (1) cpd15238[c]	0,10000	Fatty acid metabolism
rxn09452	fatty-acid--CoA ligase (dodecanoate), peroxisomal	6.2.1.3	slr1609	(1) ATP[c] + (1) CoA[c] + (1) H+[c] + (1) Dodecanoate (n-C12:0)[c] --> (1) PPi[c] + (1) AMP[c] + (1) Lauroyl-CoA[c]	(1) cpd00002[c] + (1) cpd00010[c] + (1) cpd00067[c] + (1) cpd01741[c] --> (1) cpd00012[c] + (1) cpd00018[c] + (1) cpd01260[c]	0,10000	Fatty acid metabolism
rxn09453	fatty-acid--CoA ligase (decanoate), peroxisomal	6.2.1.3	slr1609	(1) ATP[c] + (1) CoA[c] + (1) H+[c] + (1) Decanoate[c] --> (1) PPi[c] + (1) AMP[c] + (1) Decanoyl-CoA[c]	(1) cpd00002[c] + (1) cpd00010[c] + (1) cpd00067[c] + (1) cpd01107[c] --> (1) cpd00012[c] + (1) cpd00018[c] + (1) cpd03128[c]	0,10000	Fatty acid metabolism
rxn09451	fatty-acid--CoA ligase (tetradecenoate), peroxisomal	6.2.1.3	slr1609	(1) ATP[c] + (1) CoA[c] + (1) H+[c] + (1) tetradecenoate[c] <=> (1) PPi[c] + (1) AMP[c] + (1) Tetradecenoyl-CoA[c]	(1) cpd00002[c] + (1) cpd00010[c] + (1) cpd00067[c] + (1) cpd15298[c] <=> (1) cpd00012[c] + (1) cpd00018[c] + (1) cpd15295[c]	-10000,10000	Fatty acid metabolism
rxn08767	3-ketoacyl-CoA thiolase	2.3.1.16	slr1993	(1) CoA[c] + (1) 3-Oxostearoyl-CoA[c] <=> (1) Acetyl-CoA[c] + (1) Palmitoyl-CoA[c]	(1) cpd00010[c] + (1) cpd14935[c] <=> (1) cpd00022[c] + (1) cpd00134[c]	-10000,10000	Fatty acid metabolism
rxn00874	Acetyl-CoA:acetyl-CoA C-acetyltransferase	2.3.1.9	slr1994	(1) Acetyl-CoA[c] + (1) Butyryl-CoA[c] <=> (1) CoA[c] + (1) 3-Oxohexanoyl-CoA[c]	(1) cpd00022[c] + (1) cpd00120[c] <=> (1) cpd00010[c] + (1) cpd03123[c]	-10000,10000	Fatty acid metabolism
rxn05343	Octanoyl-[acyl-carrier protein]:malonyl-[acyl-carrier-protein]	2.3.1.41	(sll1069 or slr1332)	(1) H+[c] + (1) Octanoyl-ACP[c] + (1) Malonyl-[acyl-carrier protein][c] --> (1) CO2[c] + (1) 3-oxodecanoyl-acp[c] + (1) ACP[c]	(1) cpd00067[c] + (1) cpd11470[c] + (1) cpd11492[c] --> (1) cpd00011[c] + (1) cpd11487[c] + (1) cpd11493[c]	0,10000	Fatty Acid Biosynthesis
rxn05344	Tetradecanoyl-[acyl-carrier protein]:malonyl-[acyl-carrier-protein]	2.3.1.41	(sll1069 or slr1332)	(1) H+[c] + (1) Tetradecanoyl-[acyl-carrier protein][c] + (1) Malonyl-[acyl-carrier protein][c] --> (1) CO2[c] + (1) 3-oxohexadecanoyl-acp[c] + (1) ACP[c]	(1) cpd00067[c] + (1) cpd11466[c] + (1) cpd11492[c] --> (1) cpd00011[c] + (1) cpd11485[c] + (1) cpd11493[c]	0,10000	Fatty Acid Biosynthesis
rxn05345	dodecanoyl-[acyl-carrier-protein]:malonyl-[acyl-carrier-protein]	2.3.1.41	(sll1069 or slr1332)	(1) H+[c] + (1) Dodecanoyl-ACP[c] + (1) Malonyl-[acyl-carrier protein][c] --> (1) CO2[c] + (1) 3-oxotetradecanoyl-acp[c] + (1) ACP[c]	(1) cpd00067[c] + (1) cpd11468[c] + (1) cpd11492[c] --> (1) cpd00011[c] + (1) cpd11491[c] + (1) cpd11493[c]	0,10000	Fatty Acid Biosynthesis
rxn05346	butyryl-[acyl-carrier protein]:malonyl-[acyl-carrier-protein]	2.3.1.41	(sll1069 or slr1332)	(1) H+[c] + (1) Butyryl-ACP[c] + (1) Malonyl-[acyl-carrier protein][c] --> (1) CO2[c] + (1) 3-Oxohexanoyl-[acp][c] + (1) ACP[c]	(1) cpd00067[c] + (1) cpd11464[c] + (1) cpd11492[c] --> (1) cpd00011[c] + (1) cpd11486[c] + (1) cpd11493[c]	0,10000	Fatty Acid Biosynthesis
rxn05348	Decanoyl-[acyl-carrier protein]:malonyl-[acyl-carrier-protein]	2.3.1.41	(sll1069 or slr1332)	(1) H+[c] + (1) Decanoyl-ACP[c] + (1) Malonyl-[acyl-carrier protein][c] --> (1) CO2[c] + (1) 3-oxododecanoyl-acp[c] + (1) ACP[c]	(1) cpd00067[c] + (1) cpd11474[c] + (1) cpd11492[c] --> (1) cpd00011[c] + (1) cpd11489[c] + (1) cpd11493[c]	0,10000	Fatty Acid Biosynthesis
rxn05350	hexanoyl-[acyl-carrier protein]:malonyl-[acyl-carrier-protein]	2.3.1.41	(sll1069 or slr1332)	(1) H+[c] + (1) Hexanoyl-ACP[c] + (1) Malonyl-[acyl-carrier protein][c] --> (1) CO2[c] + (1) 3-oxooctanoyl-acp[c] + (1) ACP[c]	(1) cpd00067[c] + (1) cpd11472[c] + (1) cpd11492[c] --> (1) cpd00011[c] + (1) cpd11490[c] + (1) cpd11493[c]	0,10000	Fatty Acid Biosynthesis
rxn07997	3-oxoacyl-[acyl-carrier-protein] synthase (n-C12:1)	2.3.1.41	(sll1069 or slr1332)	(1) H+[c] + (1) Malonyl-[acyl-carrier protein][c] + (1) cis-dec-3-enoyl-[acyl-carrier protein][c] --> (1) CO2[c] + (1) ACP[c] + (1) 3-oxo-cis-dodec-5-enoyl-[acyl-carrier protein][c]	(1) cpd00067[c] + (1) cpd11492[c] + (1) cpd15416[c] --> (1) cpd00011[c] + (1) cpd11493[c] + (1) cpd15373[c]	0,10000	Fatty Acid Biosynthesis
rxn07998	3-oxoacyl-[acyl-carrier-protein] synthase (n-C14:1)	2.3.1.41	(sll1069 or slr1332)	(1) H+[c] + (1) Malonyl-[acyl-carrier protein][c] + (1) cis-dodec-5-enoyl-[acyl-carrier protein][c] --> (1) CO2[c] + (1) ACP[c] + (1) 3-oxo-cis-myristol-7-eoyl-[acyl-carrier protein][c]	(1) cpd00067[c] + (1) cpd11492[c] + (1) cpd15415[c] --> (1) cpd00011[c] + (1) cpd11493[c] + (1) cpd15374[c]	0,10000	Fatty Acid Biosynthesis
rxn08000	3-oxoacyl-[acyl-carrier-protein] synthase (n-C16:1)	2.3.1.41	(sll1069 or slr1332)	(1) H+[c] + (1) Malonyl-[acyl-carrier protein][c] + (1) Tetradecenoyl-ACP[c] --> (1) CO2[c] + (1) ACP[c] + (1) 3-oxo-cis-palm-9-eoyl-[acyl-carrier protein][c]	(1) cpd00067[c] + (1) cpd11492[c] + (1) cpd15294[c] --> (1) cpd00011[c] + (1) cpd11493[c] + (1) cpd15375[c]	0,10000	Fatty Acid Biosynthesis
rxn08002	3-oxoacyl-[acyl-carrier-protein] synthase (n-C18:1)	2.3.1.41	(sll1069 or slr1332)	(1) H+[c] + (1) Malonyl-[acyl-carrier protein][c] + (1) Hexadecenoyl-ACP[c] --> (1) CO2[c] + (1) ACP[c] + (1) 3-oxo-cis-vacc-11-enoyl-[acyl-carrier protein][c]	(1) cpd00067[c] + (1) cpd11492[c] + (1) cpd15239[c] --> (1) cpd00011[c] + (1) cpd11493[c] + (1) cpd15376[c]	0,10000	Fatty Acid Biosynthesis
rxn08766	beta-ketoacyl-ACP synthase (2)	2.3.1.41	(sll1069 or slr1332)	(1) Acetyl-CoA[c] + (1) H+[c] + (1) Malonyl-[acyl-carrier protein][c] --> (1) CoA[c] + (1) CO2[c] + (1) Acetoacetyl-ACP[c]	(1) cpd00022[c] + (1) cpd00067[c] + (1) cpd11492[c] --> (1) cpd00010[c] + (1) cpd00011[c] + (1) cpd11488[c]	0,10000	Fatty Acid Biosynthesis
G3P_AT182	glycerol-3-phosphate acyltransferase (C18:2)	2.3.1.15	(sll1973 or slr1510)	(1) Glycerol-3-phosphate[c] + (1) Linoleoyl-ACP[c] --> (1) H+[c] + (1) ACP[c] + (1) 1-octadec-9-12-dienoyl-sn-glycerol 3-phosphate[c]	(1) cpd00080[c] + (1) cpd14881[c] --> (1) cpd00067[c] + (1) cpd11493[c] + (1) cpdLiG3P[c]	0,10000	Fatty Acid Biosynthesis
G3P_AT183	glycerol-3-phosphate acyltransferase (C18:3)	2.3.1.15	(sll1973 or slr1510)	(1) Glycerol-3-phosphate[c] + (1) alpha-Linolenoyl-ACP[c] --> (1) H+[c] + (1) ACP[c] + (1) 1-octadec-9-12-15-trienoyl-sn-glycerol 3-phosphate[c]	(1) cpd00080[c] + (1) cpd14882[c] --> (1) cpd00067[c] + (1) cpd11493[c] + (1) cp_aLG3P[c]	0,10000	Fatty Acid Biosynthesis
G3PAT181	glycerol-3-phosphate acyltransferase (C18:1)	2.3.1.15	(sll1973 or slr1510)	(1) Octadecenoyl-ACP[c] + (1) Glycerol-3-phosphate[c] --> (1) H+[c] + (1) ACP[c] + (1) 1-octadec-9-enoyl-sn-glycerol 3-phosphate[c]	(1) cpd11825[c] + (1) cpd00080[c] --> (1) cpd00067[c] + (1) cpd11493[c] + (1) 1odec9eg3p[c]	0,10000	Fatty Acid Biosynthesis
G3PAT1836912	glycerol-3-phosphate acyltransferase (C18:3)	2.3.1.15	(sll1973 or slr1510)	(1) OctadecatetraenoilACP[c] + (1) Glycerol-3-phosphate[c] --> (1) H+[c] + (1) ACP[c] + (1) 1-octadec-6-9-12-15-tetraenoyl-sn-glycerol 3-phosphate[c]	(1) octe691215ACP[c] + (1) cpd00080[c] --> (1) cpd00067[c] + (1) cpd11493[c] + (1) 1odec691215eg3p[c]	0,10000	Fatty Acid Biosynthesis
G3PAT184691215	glycerol-3-phosphate acyltransferase (C18:4)	2.3.1.15	(sll1973 or slr1510)	(1) gamma-linolenoilACP[c] + (1) Glycerol-3-phosphate[c] --> (1) H+[c] + (1) ACP[c] + (1) 1-octadec-6-9-12trienoyl-sn-glycerol 3-phosphate[c]	(1) octe6912ACP[c] + (1) cpd00080[c] --> (1) cpd00067[c] + (1) cpd11493[c] + (1) 1odec6912eg3p[c]	0,10000	Fatty Acid Biosynthesis
DES_6	stearoyl-CoA desaturase (delta-6 desaturase)	1.14.19.3	sll0262	(2) H+[c] + (1) O2[c] + (2) Reduced ferredoxin[c] + (1) alpha-Linolenoyl-ACP[c] --> (2) H2O[c] + (1) OctadecatetraenoilACP[c] + (2) Oxidized ferredoxin[c]	(2) cpd00067[c] + (1) cpd00007[c] + (2) cpfdxr22[c] + (1) cpd14882[c] --> (2) cpd00001[c] + (1) octe691215ACP[c] + (2) cpfdxo22[c]	0,10000	Fatty Acid Biosynthesis
DES_6B	stearoyl-CoA desaturase (delta-6 desaturase)	1.14.19.3	sll0262	(2) H+[c] + (1) O2[c] + (1) Linoleoyl-ACP[c] + (2) Reduced ferredoxin[c] --> (2) H2O[c] + (1) gamma-linolenoilACP[c] + (2) Oxidized ferredoxin[c]	(2) cpd00067[c] + (1) cpd00007[c] + (1) cpd14881[c] + (2) cpfdxr22[c] --> (2) cpd00001[c] + (1) octe6912ACP[c] + (2) cpfdxo22[c]	0,10000	Fatty Acid Biosynthesis
Desat9	Fatty acid (n-18:1ACP) desaturase (delta 9)	1.14.19.1	sll0541	(2) H+[c] + (1) O2[c] + (1) Stearoyl-[acyl-carrier protein][c] + (2) Reduced ferredoxin[c] --> (2) H2O[c] + (1) Octadecenoyl-ACP[c] + (2) Oxidized ferredoxin[c]	(2) cpd00067[c] + (1) cpd00007[c] + (1) cpd12458[c] + (2) cpfdxr22[c] --> (2) cpd00001[c] + (1) cpd11825[c] + (2) cpfdxo22[c]	0,10000	Fatty Acid Biosynthesis
Desat15	Fatty acid (n-18:3ACP) desaturase (delta 15)	1.14.19.-	sll1441	(2) H+[c] + (1) O2[c] + (1) Linoleoyl-ACP[c] + (2) Reduced ferredoxin[c] --> (2) H2O[c] + (1) alpha-Linolenoyl-ACP[c] + (2) Oxidized ferredoxin[c]	(2) cpd00067[c] + (1) cpd00007[c] + (1) cpd14881[c] + (2) cpfdxr22[c] --> (2) cpd00001[c] + (1) cpd14882[c] + (2) cpfdxo22[c]	0,10000	Fatty Acid Biosynthesis
PGPS_182	Phosphatidylglycerol synthase (n-C16:0)	2.7.8.5	sll1522	(1) Glycerol-3-phosphate[c] + (1) CDP-1,2-dioctadec-9-12-dienoylglycerol[c] --> (1) H+[c] + (1) CMP[c] + (1) Phosphatidylglycerophosphate (dioctadec-9-12-dienoyl, n-C18:2)[c]	(1) cpd00080[c] + (1) CDPDG182[c] --> (1) cpd00067[c] + (1) cpd00046[c] + (1) cpPGP182[c]	0,10000	Fatty Acid Biosynthesis
PGPS_183	Phosphatidylglycerol synthase (n-C16:0)	2.7.8.5	sll1522	(1) Glycerol-3-phosphate[c] + (1) CDP-1,2-dioctadec-9-12-15-trienoylglycerol[c] --> (1) H+[c] + (1) CMP[c] + (1) Phosphatidylglycerophosphate (dioctadec-9-12-15-trienoyl, n-C18:3)[c]	(1) cpd00080[c] + (1) CDPDG183[c] --> (1) cpd00067[c] + (1) cpd00046[c] + (1) cpPGP183[c]	0,10000	Fatty Acid Biosynthesis
PGSA181	Phosphatidylglycerol synthase (n-C18:1)	2.7.8.5	sll1522	(1) CDP-1,2-dioctadec-9-enoylglycerol[c] + (1) Glycerol-3-phosphate[c] --> (1) H+[c] + (1) CMP[c] + (1) Phosphatidylglycerophosphate (dioctadec-9-enoyl, n-C18:1)[c]	(1) cdpdodec9eg[c] + (1) cpd00080[c] --> (1) cpd00067[c] + (1) cpd00046[c] + (1) cpdPGP181:9[c]	0,10000	Fatty Acid Biosynthesis
PGSA1836912	Phosphatidylglycerol synthase (n-C18:3)	2.7.8.5	sll1522	(1) CDP-1,2-dioctadec-6-9-12-trienoylglycerol[c] + (1) Glycerol-3-phosphate[c] --> (1) H+[c] + (1) CMP[c] + (1) Phosphatidylglycerophosphate (dioctadec-6-9-12-trienoyl, n-C18:3)[c]	(1) cdpdodec6912eg[c] + (1) cpd00080[c] --> (1) cpd00067[c] + (1) cpd00046[c] + (1) pgp183:6:9:12[c]	0,10000	Fatty Acid Biosynthesis
PGSA184691215	Phosphatidylglycerol synthase (n-C18:4)	2.7.8.5	sll1522	(1) CDP-1,2-dioctadec-6-9-12-15-tetraenoylglycerol[c] + (1) Glycerol-3-phosphate[c] --> (1) H+[c] + (1) CMP[c] + (1) Phosphatidylglycerophosphate (dioctadec-6-9-12-15-tetraenoyl, n-C18:4)[c]	(1) cdpdodec691215eg[c] + (1) cpd00080[c] --> (1) cpd00067[c] + (1) cpd00046[c] + (1) pgp184:6:9:12:15[c]	0,10000	Fatty Acid Biosynthesis
rxn09111	Phosphatidylglycerol synthase (n-C16:0)	2.7.8.5	sll1522	(1) Glycerol-3-phosphate[c] + (1) CDP-1,2-dihexadecanoylglycerol[c] --> (1) CMP[c] + (1) Phosphatidylglycerophosphate dihexadecanoyl[c]	(1) cpd00080[c] + (1) cpd15419[c] --> (1) cpd00046[c] + (1) cpd15545[c]	0,10000	Fatty Acid Biosynthesis
rxn09112	Phosphatidylglycerol synthase (n-C16:1)	2.7.8.5	sll1522	(1) Glycerol-3-phosphate[c] + (1) CDP-1,2-dihexadec-9-enoylglycerol[c] --> (1) CMP[c] + (1) Phosphatidylglycerophosphate dihexadec-9-enoyl[c]	(1) cpd00080[c] + (1) cpd15418[c] --> (1) cpd00046[c] + (1) cpd15546[c]	0,10000	Fatty Acid Biosynthesis
rxn09113	Phosphatidylglycerol synthase (n-C18:0)	2.7.8.5	sll1522	(1) Glycerol-3-phosphate[c] + (1) CDP-1,2-dioctadecanoylglycerol[c] --> (1) CMP[c] + (1) Phosphatidylglycerophosphate dioctadecanoyl[c]	(1) cpd00080[c] + (1) cpd15421[c] --> (1) cpd00046[c] + (1) cpd15547[c]	0,10000	Fatty Acid Biosynthesis
rxn09114	Phosphatidylglycerol synthase (n-C18:1)	2.7.8.5	sll1522	(1) Glycerol-3-phosphate[c] + (1) CDP-1,2-dioctadec-11-enoylglycerol[c] --> (1) CMP[c] + (1) Phosphatidylglycerophosphate dioctadec-11-enoyl[c]	(1) cpd00080[c] + (1) cpd15420[c] --> (1) cpd00046[c] + (1) cpd15548[c]	0,10000	Fatty Acid Biosynthesis
rxn05329	(3R)-3-Hydroxybutanoyl-[acyl-carrier-protein] hydro-lyase	4.2.1.58	sll1605	(1) (R)-3-Hydroxybutanoyl-[acyl-carrier protein][c] --> (1) H2O[c] + (1) But-2-enoyl-[acyl-carrier protein][c]	(1) cpd11478[c] --> (1) cpd00001[c] + (1) cpd11465[c]	0,10000	Fatty Acid Biosynthesis
rxn05330	(3R)-3-Hydroxybutanoyl-[acyl-carrier-protein] hydro-lyase	4.2.1.58	sll1605	(1) D-3-Hydroxyhexanoyl-[acp][c] --> (1) H2O[c] + (1) (2E)-Hexenoyl-[acp][c]	(1) cpd11479[c] --> (1) cpd00001[c] + (1) cpd11473[c]	0,10000	Fatty Acid Biosynthesis
rxn05331	(3R)-3-Hydroxybutanoyl-[acyl-carrier-protein] hydro-lyase	4.2.1.61	sll1605	(1) D-3-Hydroxydodecanoyl-[acp][c] --> (1) H2O[c] + (1) (2E)-Dodecenoyl-[acp][c]	(1) cpd11480[c] --> (1) cpd00001[c] + (1) cpd11469[c]	0,10000	Fatty Acid Biosynthesis
rxn05332	(3R)-3-Hydroxypalmitoyl-[acyl-carrier-protein] hydro-lyase	4.2.1.61	sll1605	(1) R-3-hydroxypalmitoyl-acyl-carrierprotein-[c] --> (1) H2O[c] + (1) (2E)-Hexadecenoyl-[acp][c]	(1) cpd11481[c] --> (1) cpd00001[c] + (1) cpd11477[c]	0,10000	Fatty Acid Biosynthesis
rxn05333	(3R)-3-Hydroxybutanoyl-[acyl-carrier-protein] hydro-lyase	4.2.1.60	sll1605	(1) (R)-3-Hydroxydecanoyl-[acyl-carrier protein][c] --> (1) H2O[c] + (1) (2E)-Decenoyl-[acp][c]	(1) cpd11482[c] --> (1) cpd00001[c] + (1) cpd11475[c]	0,10000	Fatty Acid Biosynthesis
rxn05334	(3R)-3-Hydroxybutanoyl-[acyl-carrier-protein] hydro-lyase	4.2.1.58	sll1605	(1) (R)-3-Hydroxyoctanoyl-[acyl-carrier protein][c] --> (1) H2O[c] + (1) (2E)-Octenoyl-[acp][c]	(1) cpd11483[c] --> (1) cpd00001[c] + (1) cpd11471[c]	0,10000	Fatty Acid Biosynthesis
rxn05335	(3R)-3-Hydroxypalmitoyl-[acyl-carrier-protein] hydro-lyase	4.2.1.61	sll1605	(1) (R)-3-Hydroxytetradecanoyl-[acyl-carrier protein][c] --> (1) H2O[c] + (1) (2E)-Tetradecenoyl-[acp][c]	(1) cpd11484[c] --> (1) cpd00001[c] + (1) cpd11467[c]	0,10000	Fatty Acid Biosynthesis
rxn07578	3hydroxyacyl-acp dehydratase (c18:0)	4.2.1.61	sll1605	(1) 3-Hydroxystearoyl-[acp][c] --> (1) H2O[c] + (1) (2E)-Octadecenoyl-[acp][c]	(1) cpd14939[c] --> (1) cpd00001[c] + (1) cpd14940[c]	0,10000	Fatty Acid Biosynthesis
rxn07976	3-hydroxyacyl-[acyl-carrier-protein] dehydratase (n-C12:1)	4.2.1.61	sll1605	(1) (R)-3-hydroxy-cis-dodec-5-enoyl-[acyl-carrier protein][c] --> (1) H2O[c] + (1) trans-3-cis-5-dodecenoyl-[acyl-carrier protein][c]	(1) cpd15366[c] --> (1) cpd00001[c] + (1) cpd15569[c]	0,10000	Fatty Acid Biosynthesis
rxn07977	3-hydroxyacyl-[acyl-carrier-protein] dehydratase (n-C14:1)	4.2.1.61	sll1605	(1) (R)-3-hydroxy-cis-myristol-7-eoyl-[acyl-carrier protein][c] --> (1) H2O[c] + (1) trans-3-cis-7-myristoleoyl-[acyl-carrier protein][c]	(1) cpd15368[c] --> (1) cpd00001[c] + (1) cpd15570[c]	0,10000	Fatty Acid Biosynthesis
rxn07978	3-hydroxyacyl-[acyl-carrier-protein] dehydratase (n-C16:1)	4.2.1.61	sll1605	(1) (R)-3-hydroxy-cis-palm-9-eoyl-[acyl-carrier protein][c] --> (1) H2O[c] + (1) trans-3-cis-9-palmitoleoyl-[acyl-carrier protein][c]	(1) cpd15369[c] --> (1) cpd00001[c] + (1) cpd15571[c]	0,10000	Fatty Acid Biosynthesis
rxn07980	3-hydroxyacyl-[acyl-carrier-protein] dehydratase (n-C18:1)	4.2.1.61	sll1605	(1) (R)-3-hydroxy-cis-vacc-11-enoyl-[acyl-carrier protein][c] --> (1) H2O[c] + (1) trans-3-cis-11-vacceoyl-[acyl-carrier protein][c]	(1) cpd15370[c] --> (1) cpd00001[c] + (1) cpd15568[c]	0,10000	Fatty Acid Biosynthesis
AG3P_OAT182	Linoleoyl-G3P O-acyltransferase (n-C18:2)	2.3.1.51	sll1848	(1) Linoleoyl-ACP[c] + (1) 1-octadec-9-12-dienoyl-sn-glycerol 3-phosphate[c] --> (1) ACP[c] + (1) 1,2-dioctadec-9-12-dienoyl-sn-glycerol 3-phosphate[c]	(1) cpd14881[c] + (1) cpdLiG3P[c] --> (1) cpd11493[c] + (1) c_DLiG3P[c]	0,10000	Fatty Acid Biosynthesis
AG3P_OAT183	Linolenoyl-G3P O-acyltransferase (n-C18:3)	2.3.1.51	sll1848	(1) alpha-Linolenoyl-ACP[c] + (1) 1-octadec-9-12-15-trienoyl-sn-glycerol 3-phosphate[c] --> (1) ACP[c] + (1) 1,2-dioctadec-9-12-15-trienoyl-sn-glycerol 3-phosphate[c]	(1) cpd14882[c] + (1) cp_aLG3P[c] --> (1) cpd11493[c] + (1) c_DaLG3P[c]	0,10000	Fatty Acid Biosynthesis
AGPAT181	1-octadec-7-enoyl-sn-glycerol 3-phosphate O-acyltransferase (n-C18:1)	2.3.1.51	sll1848	(1) 1-octadec-9-enoyl-sn-glycerol 3-phosphate[c] + (1) Octadecenoyl-ACP[c] --> (1) ACP[c] + (1) 1,2-dioctadec-9-enoyl-sn-glycerol 3-phosphate[c]	(1) 1odec9eg3p[c] + (1) cpd11825[c] --> (1) cpd11493[c] + (1) pa181:9[c]	0,10000	Fatty Acid Biosynthesis
AGPAT1836912	1-octadec-enoyl-sn-glycerol 3-phosphate O-acyltransferase (n-C18:3)	2.3.1.51	sll1848	(1) 1-octadec-6-9-12trienoyl-sn-glycerol 3-phosphate[c] + (1) gamma-linolenoilACP[c] --> (1) ACP[c] + (1) 1,2-dioctadec-6-9-12-trienoyl-sn-glycerol 3-phosphate[c]	(1) 1odec6912eg3p[c] + (1) octe6912ACP[c] --> (1) cpd11493[c] + (1) pa183:6:9:12[c]	0,10000	Fatty Acid Biosynthesis
AGPAT184691215	1-octadec-enoyl-sn-glycerol 3-phosphate O-acyltransferase (n-C18:4)	2.3.1.51	sll1848	(1) 1-octadec-6-9-12-15-tetraenoyl-sn-glycerol 3-phosphate[c] + (1) OctadecatetraenoilACP[c] --> (1) ACP[c] + (1) 1,2-dioctadec-6-9-12-15-tetraenoyl-sn-glycerol 3-phosphate[c]	(1) 1odec691215eg3p[c] + (1) octe691215ACP[c] --> (1) cpd11493[c] + (1) pa184:6:9:12:15[c]	0,10000	Fatty Acid Biosynthesis
rxn08086	1-hexadecanoyl-sn-glycerol 3-phosphate O-acyltransferase (n-C16:0)	2.3.1.51	sll1848	(1) hexadecanoyl-acp[c] + (1) 1-hexadecanoyl-sn-glycerol 3-phosphate[c] --> (1) ACP[c] + (1) 1,2-dihexadecanoyl-sn-glycerol 3-phosphate[c]	(1) cpd11476[c] + (1) cpd15327[c] --> (1) cpd11493[c] + (1) cpd15524[c]	0,10000	Fatty Acid Biosynthesis
rxn08087	1-hexadec-7-enoyl-sn-glycerol 3-phosphate O-acyltransferase (n-C16:1)	2.3.1.51	sll1848	(1) Hexadecenoyl-ACP[c] + (1) 1-hexadec-9-enoyl-sn-glycerol 3-phosphate[c] --> (1) ACP[c] + (1) 1,2-dihexadec-9-enoyl-sn-glycerol 3-phosphate[c]	(1) cpd15239[c] + (1) cpd15326[c] --> (1) cpd11493[c] + (1) cpd15525[c]	0,10000	Fatty Acid Biosynthesis
rxn08088_mod	1-octadecanoyl-sn-glycerol 3-phosphate O-acyltransferase (n-C18:0)	2.3.1.51	sll1848	(1) Stearoyl-[acyl-carrier protein][c] + (1) 1-octadecanoyl-sn-glycerol 3-phosphate[c] --> (1) ACP[c] + (1) 1,2-dioctadecanoyl-sn-glycerol 3-phosphate[c]	(1) cpd12458[c] + (1) cpd15329[c] --> (1) cpd11493[c] + (1) cpd15526[c]	0,10000	Fatty Acid Biosynthesis
rxn08089	1-octadec-7-enoyl-sn-glycerol 3-phosphate O-acyltransferase (n-C18:1)	2.3.1.51	sll1848	(1) Octadecenoyl-ACP[c] + (1) 1-octadec-11-enoyl-sn-glycerol 3-phosphate[c] --> (1) ACP[c] + (1) 1,2-dioctadec-11-enoyl-sn-glycerol 3-phosphate[c]	(1) cpd11825[c] + (1) cpd15328[c] --> (1) cpd11493[c] + (1) cpd15527[c]	0,10000	Fatty Acid Biosynthesis
rxn08549	glycerol-3-phosphate acyltransferase (C16:0)	2.3.1.15	sll1973 or slr1510	(1) Glycerol-3-phosphate[c] + (1) hexadecanoyl-acp[c] --> (1) ACP[c] + (1) 1-hexadecanoyl-sn-glycerol 3-phosphate[c]	(1) cpd00080[c] + (1) cpd11476[c] --> (1) cpd11493[c] + (1) cpd15327[c]	0,10000	Fatty Acid Biosynthesis
rxn08550	glycerol-3-phosphate acyltransferase (C16:1)	2.3.1.15	sll1973 or slr1510	(1) Glycerol-3-phosphate[c] + (1) Hexadecenoyl-ACP[c] --> (1) ACP[c] + (1) 1-hexadec-9-enoyl-sn-glycerol 3-phosphate[c]	(1) cpd00080[c] + (1) cpd15239[c] --> (1) cpd11493[c] + (1) cpd15326[c]	0,10000	Fatty Acid Biosynthesis
rxn08551_mod	glycerol-3-phosphate acyltransferase (C18:0)	2.3.1.15	sll1973 or slr1510	(1) Glycerol-3-phosphate[c] + (1) Stearoyl-[acyl-carrier protein][c] --> (1) ACP[c] + (1) 1-octadecanoyl-sn-glycerol 3-phosphate[c]	(1) cpd00080[c] + (1) cpd12458[c] --> (1) cpd11493[c] + (1) cpd15329[c]	0,10000	Fatty Acid Biosynthesis
rxn08552	glycerol-3-phosphate acyltransferase (C18:1)	2.3.1.15	sll1973 or slr1510	(1) Glycerol-3-phosphate[c] + (1) Octadecenoyl-ACP[c] --> (1) ACP[c] + (1) 1-octadec-11-enoyl-sn-glycerol 3-phosphate[c]	(1) cpd00080[c] + (1) cpd11825[c] --> (1) cpd11493[c] + (1) cpd15328[c]	0,10000	Fatty Acid Biosynthesis
rxn05342	(3R)-3-Hydroxytetradecanoyl-[acyl-carrier-protein]:NADP+	1.1.1.100	slr0886	(1) NADPH[c] + (1) H+[c] + (1) 3-oxotetradecanoyl-acp[c] --> (1) NADP[c] + (1) (R)-3-Hydroxytetradecanoyl-[acyl-carrier protein][c]	(1) cpd00005[c] + (1) cpd00067[c] + (1) cpd11491[c] --> (1) cpd00006[c] + (1) cpd11484[c]	0,10000	Fatty Acid Biosynthesis
rxn07577	3oxoacyl-acp reductase (c18:0)	1.1.1.100	slr0886	(1) NADPH[c] + (1) H+[c] + (1) 3-Oxostearoyl-[acp][c] --> (1) NADP[c] + (1) 3-Hydroxystearoyl-[acp][c]	(1) cpd00005[c] + (1) cpd00067[c] + (1) cpd14938[c] --> (1) cpd00006[c] + (1) cpd14939[c]	0,10000	Fatty Acid Biosynthesis
rxn07987	3-oxoacyl-[acyl-carrier-protein] reductase (n-C12:1)	1.1.1.100	slr0886	(1) NADPH[c] + (1) H+[c] + (1) 3-oxo-cis-dodec-5-enoyl-[acyl-carrier protein][c] --> (1) NADP[c] + (1) (R)-3-hydroxy-cis-dodec-5-enoyl-[acyl-carrier protein][c]	(1) cpd00005[c] + (1) cpd00067[c] + (1) cpd15373[c] --> (1) cpd00006[c] + (1) cpd15366[c]	0,10000	Fatty Acid Biosynthesis
rxn07989	3-oxoacyl-[acyl-carrier-protein] reductase (n-C14:1)	1.1.1.100	slr0886	(1) NADPH[c] + (1) H+[c] + (1) 3-oxo-cis-myristol-7-eoyl-[acyl-carrier protein][c] --> (1) NADP[c] + (1) (R)-3-hydroxy-cis-myristol-7-eoyl-[acyl-carrier protein][c]	(1) cpd00005[c] + (1) cpd00067[c] + (1) cpd15374[c] --> (1) cpd00006[c] + (1) cpd15368[c]	0,10000	Fatty Acid Biosynthesis
rxn07991	3-oxoacyl-[acyl-carrier-protein] reductase (n-C16:1)	1.1.1.100	slr0886	(1) NADPH[c] + (1) H+[c] + (1) 3-oxo-cis-palm-9-eoyl-[acyl-carrier protein][c] --> (1) NADP[c] + (1) (R)-3-hydroxy-cis-palm-9-eoyl-[acyl-carrier protein][c]	(1) cpd00005[c] + (1) cpd00067[c] + (1) cpd15375[c] --> (1) cpd00006[c] + (1) cpd15369[c]	0,10000	Fatty Acid Biosynthesis
rxn07993	3-oxoacyl-[acyl-carrier-protein] reductase (n-C18:1)	1.1.1.100	slr0886	(1) NADPH[c] + (1) H+[c] + (1) 3-oxo-cis-vacc-11-enoyl-[acyl-carrier protein][c] --> (1) NADP[c] + (1) (R)-3-hydroxy-cis-vacc-11-enoyl-[acyl-carrier protein][c]	(1) cpd00005[c] + (1) cpd00067[c] + (1) cpd15376[c] --> (1) cpd00006[c] + (1) cpd15370[c]	0,10000	Fatty Acid Biosynthesis
rxn08861	Malonyl-ACP decarboxylase	Undetermined	slr0909	(1) H+[c] + (1) Malonyl-[acyl-carrier protein][c] --> (1) CO2[c] + (1) Acetyl-ACP[c]	(1) cpd00067[c] + (1) cpd11492[c] --> (1) cpd00011[c] + (1) cpd11494[c]	0,10000	Fatty Acid Biosynthesis
rxn05322	Butyryl-[acyl-carrier protein]:malonyl-CoA	1.3.1.9	slr1051	(1) NADH[c] + (1) H+[c] + (1) But-2-enoyl-[acyl-carrier protein][c] --> (1) NAD[c] + (1) Butyryl-ACP[c]	(1) cpd00004[c] + (1) cpd00067[c] + (1) cpd11465[c] --> (1) cpd00003[c] + (1) cpd11464[c]	0,10000	Fatty Acid Biosynthesis
rxn05323	Tetradecanoyl-[acyl-carrier protein]:malonyl-CoA	1.3.1.9	slr1051	(1) NADH[c] + (1) H+[c] + (1) (2E)-Tetradecenoyl-[acp][c] --> (1) NAD[c] + (1) Tetradecanoyl-[acyl-carrier protein][c]	(1) cpd00004[c] + (1) cpd00067[c] + (1) cpd11467[c] --> (1) cpd00003[c] + (1) cpd11466[c]	0,10000	Fatty Acid Biosynthesis
rxn05324	Dodecanoyl-[acyl-carrier protein]:malonyl-CoA	1.3.1.9	slr1051	(1) NADH[c] + (1) H+[c] + (1) (2E)-Dodecenoyl-[acp][c] --> (1) NAD[c] + (1) Dodecanoyl-ACP[c]	(1) cpd00004[c] + (1) cpd00067[c] + (1) cpd11469[c] --> (1) cpd00003[c] + (1) cpd11468[c]	0,10000	Fatty Acid Biosynthesis
rxn05325	Octanoyl-[acyl-carrier protein]:malonyl-CoA	1.3.1.9	slr1051	(1) NADH[c] + (1) H+[c] + (1) (2E)-Octenoyl-[acp][c] --> (1) NAD[c] + (1) Octanoyl-ACP[c]	(1) cpd00004[c] + (1) cpd00067[c] + (1) cpd11471[c] --> (1) cpd00003[c] + (1) cpd11470[c]	0,10000	Fatty Acid Biosynthesis
rxn05326	Hexanoyl-[acyl-carrier protein]:malonyl-CoA	1.3.1.9	slr1051	(1) NADH[c] + (1) H+[c] + (1) (2E)-Hexenoyl-[acp][c] --> (1) NAD[c] + (1) Hexanoyl-ACP[c]	(1) cpd00004[c] + (1) cpd00067[c] + (1) cpd11473[c] --> (1) cpd00003[c] + (1) cpd11472[c]	0,10000	Fatty Acid Biosynthesis
rxn05327	Decanoyl-[acyl-carrier protein]:malonyl-CoA	1.3.1.9	slr1051	(1) NADH[c] + (1) H+[c] + (1) (2E)-Decenoyl-[acp][c] --> (1) NAD[c] + (1) Decanoyl-ACP[c]	(1) cpd00004[c] + (1) cpd00067[c] + (1) cpd11475[c] --> (1) cpd00003[c] + (1) cpd11474[c]	0,10000	Fatty Acid Biosynthesis
rxn05328	Hexadecanoyl-[acyl-carrier protein]:malonyl-CoA	1.3.1.9	slr1051	(1) NADH[c] + (1) H+[c] + (1) (2E)-Hexadecenoyl-[acp][c] --> (1) NAD[c] + (1) hexadecanoyl-acp[c]	(1) cpd00004[c] + (1) cpd00067[c] + (1) cpd11477[c] --> (1) cpd00003[c] + (1) cpd11476[c]	0,10000	Fatty Acid Biosynthesis
rxn05351	Tetradecanoyl-[acyl-carrier protein]:malonyl-CoA	1.3.1.10	slr1051	(1) NADPH[c] + (1) H+[c] + (1) (2E)-Tetradecenoyl-[acp][c] --> (1) NADP[c] + (1) Tetradecanoyl-[acyl-carrier protein][c]	(1) cpd00005[c] + (1) cpd00067[c] + (1) cpd11467[c] --> (1) cpd00006[c] + (1) cpd11466[c]	0,10000	Fatty Acid Biosynthesis
rxn05352	Octanoyl-[acyl-carrier protein]:malonyl-CoA	1.3.1.10	slr1051	(1) NADPH[c] + (1) H+[c] + (1) (2E)-Octenoyl-[acp][c] --> (1) NADP[c] + (1) Octanoyl-ACP[c]	(1) cpd00005[c] + (1) cpd00067[c] + (1) cpd11471[c] --> (1) cpd00006[c] + (1) cpd11470[c]	0,10000	Fatty Acid Biosynthesis
rxn05353	Butyryl-[acyl-carrier protein]:malonyl-CoA	1.3.1.10	slr1051	(1) NADPH[c] + (1) H+[c] + (1) But-2-enoyl-[acyl-carrier protein][c] --> (1) NADP[c] + (1) Butyryl-ACP[c]	(1) cpd00005[c] + (1) cpd00067[c] + (1) cpd11465[c] --> (1) cpd00006[c] + (1) cpd11464[c]	0,10000	Fatty Acid Biosynthesis
rxn05355	Dodecanoyl-[acyl-carrier protein]: malonyl-CoA	1.3.1.10	slr1051	(1) NADPH[c] + (1) H+[c] + (1) (2E)-Dodecenoyl-[acp][c] --> (1) NADP[c] + (1) Dodecanoyl-ACP[c]	(1) cpd00005[c] + (1) cpd00067[c] + (1) cpd11469[c] --> (1) cpd00006[c] + (1) cpd11468[c]	0,10000	Fatty Acid Biosynthesis
rxn05356	Decanoyl-[acyl-carrier protein]:malonyl-CoA	1.3.1.10	slr1051	(1) NADPH[c] + (1) H+[c] + (1) (2E)-Decenoyl-[acp][c] --> (1) NADP[c] + (1) Decanoyl-ACP[c]	(1) cpd00005[c] + (1) cpd00067[c] + (1) cpd11475[c] --> (1) cpd00006[c] + (1) cpd11474[c]	0,10000	Fatty Acid Biosynthesis
rxn05357	Hexanoyl-[acyl-carrier protein]:oxoacyl- and enoyl-reducing and	1.3.1.10	slr1051	(1) NADPH[c] + (1) H+[c] + (1) (2E)-Hexenoyl-[acp][c] --> (1) NADP[c] + (1) Hexanoyl-ACP[c]	(1) cpd00005[c] + (1) cpd00067[c] + (1) cpd11473[c] --> (1) cpd00006[c] + (1) cpd11472[c]	0,10000	Fatty Acid Biosynthesis
rxn07579	rxn07579	1.3.1.10	slr1051	(1) NADH[c] + (1) H+[c] + (1) (2E)-Octadecenoyl-[acp][c] --> (1) NAD[c] + (1) Stearoyl-[acyl-carrier protein][c]	(1) cpd00004[c] + (1) cpd00067[c] + (1) cpd14940[c] --> (1) cpd00003[c] + (1) cpd12458[c]	0,10000	Fatty Acid Biosynthesis
rxn08386	enoyl-[acyl-carrier-protein] reductase (NADH) (n-C12:1)	1.3.1.9	slr1051	(1) NADH[c] + (1) H+[c] + (1) trans-3-cis-5-dodecenoyl-[acyl-carrier protein][c] --> (1) NAD[c] + (1) cis-dodec-5-enoyl-[acyl-carrier protein][c]	(1) cpd00004[c] + (1) cpd00067[c] + (1) cpd15569[c] --> (1) cpd00003[c] + (1) cpd15415[c]	0,10000	Fatty Acid Biosynthesis
rxn08387	enoyl-[acyl-carrier-protein] reductase (NADPH) (n-C12:1)	1.3.1.10	slr1051	(1) NADPH[c] + (1) H+[c] + (1) trans-3-cis-5-dodecenoyl-[acyl-carrier protein][c] --> (1) NADP[c] + (1) cis-dodec-5-enoyl-[acyl-carrier protein][c]	(1) cpd00005[c] + (1) cpd00067[c] + (1) cpd15569[c] --> (1) cpd00006[c] + (1) cpd15415[c]	0,10000	Fatty Acid Biosynthesis
rxn08390	enoyl-[acyl-carrier-protein] reductase (NADH) (n-C14:1)	1.3.1.9	slr1051	(1) NADH[c] + (1) H+[c] + (1) trans-3-cis-7-myristoleoyl-[acyl-carrier protein][c] --> (1) NAD[c] + (1) Tetradecenoyl-ACP[c]	(1) cpd00004[c] + (1) cpd00067[c] + (1) cpd15570[c] --> (1) cpd00003[c] + (1) cpd15294[c]	0,10000	Fatty Acid Biosynthesis
rxn08391	enoyl-[acyl-carrier-protein] reductase (NADPH) (n-C14:1)	1.3.1.10	slr1051	(1) NADPH[c] + (1) H+[c] + (1) trans-3-cis-7-myristoleoyl-[acyl-carrier protein][c] --> (1) NADP[c] + (1) Tetradecenoyl-ACP[c]	(1) cpd00005[c] + (1) cpd00067[c] + (1) cpd15570[c] --> (1) cpd00006[c] + (1) cpd15294[c]	0,10000	Fatty Acid Biosynthesis
rxn08392	enoyl-[acyl-carrier-protein] reductase (NADH) (n-C16:0)	1.3.1.9	slr1051	(1) NADH[c] + (1) H+[c] + (1) (2E)-Hexadecenoyl-[acp][c] --> (1) NAD[c] + (1) hexadecanoyl-acp[c]	(1) cpd00004[c] + (1) cpd00067[c] + (1) cpd11477[c] --> (1) cpd00003[c] + (1) cpd11476[c]	0,10000	Fatty Acid Biosynthesis
rxn08393_mod	enoyl-[acyl-carrier-protein] reductase (NADPH) (n-C16:0)	1.3.1.10	slr1051	(1) NADPH[c] + (1) H+[c] + (1) (2E)-Hexadecenoyl-[acp][c] --> (1) NADP[c] + (1) hexadecanoyl-acp[c]	(1) cpd00005[c] + (1) cpd00067[c] + (1) cpd11477[c] --> (1) cpd00006[c] + (1) cpd11476[c]	0,10000	Fatty Acid Biosynthesis
rxn08394	enoyl-[acyl-carrier-protein] reductase (NADH) (n-C16:1)	1.3.1.9	slr1051	(1) NADH[c] + (1) H+[c] + (1) trans-3-cis-9-palmitoleoyl-[acyl-carrier protein][c] --> (1) NAD[c] + (1) Hexadecenoyl-ACP[c]	(1) cpd00004[c] + (1) cpd00067[c] + (1) cpd15571[c] --> (1) cpd00003[c] + (1) cpd15239[c]	0,10000	Fatty Acid Biosynthesis
rxn08395	enoyl-[acyl-carrier-protein] reductase (NADPH) (n-C16:1)	1.3.1.10	slr1051	(1) NADPH[c] + (1) H+[c] + (1) trans-3-cis-9-palmitoleoyl-[acyl-carrier protein][c] --> (1) NADP[c] + (1) Hexadecenoyl-ACP[c]	(1) cpd00005[c] + (1) cpd00067[c] + (1) cpd15571[c] --> (1) cpd00006[c] + (1) cpd15239[c]	0,10000	Fatty Acid Biosynthesis
rxn08398	enoyl-[acyl-carrier-protein] reductase (NADH) (n-C18:1)	1.3.1.9	slr1051	(1) NADH[c] + (1) H+[c] + (1) trans-3-cis-11-vacceoyl-[acyl-carrier protein][c] --> (1) NAD[c] + (1) Octadecenoyl-ACP[c]	(1) cpd00004[c] + (1) cpd00067[c] + (1) cpd15568[c] --> (1) cpd00003[c] + (1) cpd11825[c]	0,10000	Fatty Acid Biosynthesis
rxn08399	enoyl-[acyl-carrier-protein] reductase (NADPH) (n-C18:1)	1.3.1.10	slr1051	(1) NADPH[c] + (1) H+[c] + (1) trans-3-cis-11-vacceoyl-[acyl-carrier protein][c] --> (1) NADP[c] + (1) Octadecenoyl-ACP[c]	(1) cpd00005[c] + (1) cpd00067[c] + (1) cpd15568[c] --> (1) cpd00006[c] + (1) cpd11825[c]	0,10000	Fatty Acid Biosynthesis
Desat12	Fatty acid (n-18:2ACP) desaturase (delta 12)	1.14.19.-	slr1350	(2) H+[c] + (1) O2[c] + (1) Octadecenoyl-ACP[c] + (2) Reduced ferredoxin[c] --> (2) H2O[c] + (1) Linoleoyl-ACP[c] + (2) Oxidized ferredoxin[c]	(2) cpd00067[c] + (1) cpd00007[c] + (1) cpd11825[c] + (2) cpfdxr22[c] --> (2) cpd00001[c] + (1) cpd14881[c] + (2) cpfdxo22[c]	0,10000	Fatty Acid Biosynthesis
CDGS_182	CDP-diacylglycerol synthetase (n-C18:2)	2.7.7.41	slr1369	(1) CTP[c] + (1) 1,2-dioctadec-9-12-dienoyl-sn-glycerol 3-phosphate[c] + (1) H+[c] --> (1) PPi[c] + (1) CDP-1,2-dioctadec-9-12-dienoylglycerol[c]	(1) cpd00052[c] + (1) c_DLiG3P[c] + (1) cpd00067[c] --> (1) cpd00012[c] + (1) CDPDG182[c]	0,10000	Fatty Acid Biosynthesis
CDGS_183	CDP-diacylglycerol synthetase (n-C18:3)	2.7.7.41	slr1369	(1) CTP[c] + (1) 1,2-dioctadec-9-12-15-trienoyl-sn-glycerol 3-phosphate[c] + (1) H+[c] --> (1) PPi[c] + (1) CDP-1,2-dioctadec-9-12-15-trienoylglycerol[c]	(1) cpd00052[c] + (1) c_DaLG3P[c] + (1) cpd00067[c] --> (1) cpd00012[c] + (1) CDPDG183[c]	0,10000	Fatty Acid Biosynthesis
DASYN181	CDP-diacylglycerol synthetase (n-C18:1)	2.7.7.41	slr1369	(1) H+[c] + (1) 1,2-dioctadec-9-enoyl-sn-glycerol 3-phosphate[c] + (1) CTP[c] --> (1) PPi[c] + (1) CDP-1,2-dioctadec-9-enoylglycerol[c]	(1) cpd00067[c] + (1) pa181:9[c] + (1) cpd00052[c] --> (1) cpd00012[c] + (1) cdpdodec9eg[c]	0,10000	Fatty Acid Biosynthesis
DASYN1836912	CDP-diacylglycerol synthetase (n-C18:3)	2.7.7.41	slr1369	(1) H+[c] + (1) 1,2-dioctadec-6-9-12-trienoyl-sn-glycerol 3-phosphate[c] + (1) CTP[c] --> (1) PPi[c] + (1) CDP-1,2-dioctadec-6-9-12-trienoylglycerol[c]	(1) cpd00067[c] + (1) pa183:6:9:12[c] + (1) cpd00052[c] --> (1) cpd00012[c] + (1) cdpdodec6912eg[c]	0,10000	Fatty Acid Biosynthesis
DASYN184691215	CDP-diacylglycerol synthetase (n-C18:4)	2.7.7.41	slr1369	(1) H+[c] + (1) 1,2-dioctadec-6-9-12-15-tetraenoyl-sn-glycerol 3-phosphate[c] + (1) CTP[c] --> (1) PPi[c] + (1) CDP-1,2-dioctadec-6-9-12-15-tetraenoylglycerol[c]	(1) cpd00067[c] + (1) pa184:6:9:12:15[c] + (1) cpd00052[c] --> (1) cpd00012[c] + (1) cdpdodec691215eg[c]	0,10000	Fatty Acid Biosynthesis
rxn08309	CDP-diacylglycerol synthetase (n-C16:0)	2.7.7.41	slr1369	(1) CTP[c] + (1) 1,2-dihexadecanoyl-sn-glycerol 3-phosphate[c] --> (1) PPi[c] + (1) CDP-1,2-dihexadecanoylglycerol[c]	(1) cpd00052[c] + (1) cpd15524[c] --> (1) cpd00012[c] + (1) cpd15419[c]	0,10000	Fatty Acid Biosynthesis
rxn08310	CDP-diacylglycerol synthetase (n-C16:1)	2.7.7.41	slr1369	(1) CTP[c] + (1) 1,2-dihexadec-9-enoyl-sn-glycerol 3-phosphate[c] --> (1) PPi[c] + (1) CDP-1,2-dihexadec-9-enoylglycerol[c]	(1) cpd00052[c] + (1) cpd15525[c] --> (1) cpd00012[c] + (1) cpd15418[c]	0,10000	Fatty Acid Biosynthesis
rxn08311	CDP-diacylglycerol synthetase (n-C18:0)	2.7.7.41	slr1369	(1) CTP[c] + (1) 1,2-dioctadecanoyl-sn-glycerol 3-phosphate[c] --> (1) PPi[c] + (1) CDP-1,2-dioctadecanoylglycerol[c]	(1) cpd00052[c] + (1) cpd15526[c] --> (1) cpd00012[c] + (1) cpd15421[c]	0,10000	Fatty Acid Biosynthesis
rxn08312	CDP-diacylglycerol synthetase (n-C18:1)	2.7.7.41	slr1369	(1) CTP[c] + (1) 1,2-dioctadec-11-enoyl-sn-glycerol 3-phosphate[c] --> (1) PPi[c] + (1) CDP-1,2-dioctadec-11-enoylglycerol[c]	(1) cpd00052[c] + (1) cpd15527[c] --> (1) cpd00012[c] + (1) cpd15420[c]	0,10000	Fatty Acid Biosynthesis
rxn05347	Acyl-[acyl-carrier-protein]:malonyl-[acyl-carrier-protein]	2.3.1.41	slr1511	(1) H+[c] + (1) Malonyl-[acyl-carrier protein][c] + (1) Acetyl-ACP[c] --> (1) CO2[c] + (1) Acetoacetyl-ACP[c] + (1) ACP[c]	(1) cpd00067[c] + (1) cpd11492[c] + (1) cpd11494[c] --> (1) cpd00011[c] + (1) cpd11488[c] + (1) cpd11493[c]	0,10000	Fatty Acid Biosynthesis
rxn06033	Oleoyl-[acyl-carrier-protein] hydrolase	2.3.1.85 and 3.1.2.14	slr1573	(1) H2O[c] + (1) hexadecanoyl-acp[c] --> (1) H+[c] + (1) Hexadecanoate[c] + (1) ACP[c]	(1) cpd00001[c] + (1) cpd11476[c] --> (1) cpd00067[c] + (1) cpd00214[c] + (1) cpd11493[c]	0,10000	Fatty Acid Biosynthesis
PGP_Phos182	phosphatidylglycerol phosphate phosphatase (n-C18:2)	3.1.3.27		(1) H2O[c] + (1) Phosphatidylglycerophosphate (dioctadec-9-12-dienoyl, n-C18:2)[c] + (1) H+[c] --> (1) Phosphate[c] + (1) Phosphatidylglycerol (dioctadec-9-12-dienoyl, n-C18:2)[c]	(1) cpd00001[c] + (1) cpPGP182[c] + (1) cpd00067[c] --> (1) cpd00009[c] + (1) cpdPG182[c]	0,10000	Fatty Acid Biosynthesis
PGP_Phos183	phosphatidylglycerol phosphate phosphatase (n-C18:3)	3.1.3.27		(1) H2O[c] + (1) Phosphatidylglycerophosphate (dioctadec-9-12-15-trienoyl, n-C18:3)[c] + (1) H+[c] --> (1) Phosphate[c] + (1) Phosphatidylglycerol (dioctadec-9-12-15-trienoyl, n-C18:3)[c]	(1) cpd00001[c] + (1) cpPGP183[c] + (1) cpd00067[c] --> (1) cpd00009[c] + (1) cpdPG183[c]	0,10000	Fatty Acid Biosynthesis
PGPP181	phosphatidylglycerol phosphate phosphatase (n-C18:1)	3.1.3.27		(1) H2O[c] + (1) Phosphatidylglycerophosphate (dioctadec-9-enoyl, n-C18:1)[c] --> (1) Phosphate[c] + (1) Phosphatidylglycerol (dioctadec-9-enoyl, n-C18:1)[c]	(1) cpd00001[c] + (1) cpdPGP181:9[c] --> (1) cpd00009[c] + (1) cpdPG181[c]	0,10000	Fatty Acid Biosynthesis
PGPP1836912	phosphatidylglycerol phosphate phosphatase (n-C18:3)	3.1.3.27		(1) H2O[c] + (1) Phosphatidylglycerophosphate (dioctadec-6-9-12-trienoyl, n-C18:3)[c] --> (1) Phosphate[c] + (1) Phosphatidylglycerol (dioctadec-6-9-12-trienoyl, n-C18:3)[c]	(1) cpd00001[c] + (1) pgp183:6:9:12[c] --> (1) cpd00009[c] + (1) pg183:6:9:12[c]	0,10000	Fatty Acid Biosynthesis
PGPP184691215	phosphatidylglycerol phosphate phosphatase (n-C18:4)	3.1.3.27		(1) H2O[c] + (1) Phosphatidylglycerophosphate (dioctadec-6-9-12-15-tetraenoyl, n-C18:4)[c] --> (1) Phosphate[c] + (1) Phosphatidylglycerol (dioctadec-6-9-12-15-tetraenoyl, n-C18:4)[c]	(1) cpd00001[c] + (1) pgp184:6:9:12:15[c] --> (1) cpd00009[c] + (1) pg184:6:9:12:15[c]	0,10000	Fatty Acid Biosynthesis
rxn09104	phosphatidylglycerol phosphate phosphatase (n-C16:0)	3.1.3.27		(1) H2O[c] + (1) Phosphatidylglycerophosphate dihexadecanoyl[c] --> (1) Phosphate[c] + (1) H+[c] + (1) Phosphatidylglycerol dihexadecanoyl[c]	(1) cpd00001[c] + (1) cpd15545[c] --> (1) cpd00009[c] + (1) cpd00067[c] + (1) cpd15538[c]	0,10000	Fatty Acid Biosynthesis
rxn09105	phosphatidylglycerol phosphate phosphatase (n-C16:1)	3.1.3.27		(1) H2O[c] + (1) Phosphatidylglycerophosphate dihexadec-9-enoyl[c] --> (1) Phosphate[c] + (1) H+[c] + (1) Phosphatidylglycerol dihexadec-9-enoyl[c]	(1) cpd00001[c] + (1) cpd15546[c] --> (1) cpd00009[c] + (1) cpd00067[c] + (1) cpd15539[c]	0,10000	Fatty Acid Biosynthesis
rxn09106	phosphatidylglycerol phosphate phosphatase (n-C18:0)	3.1.3.27		(1) H2O[c] + (1) Phosphatidylglycerophosphate dioctadecanoyl[c] --> (1) Phosphate[c] + (1) H+[c] + (1) Phosphatidylglycerol dioctadecanoyl[c]	(1) cpd00001[c] + (1) cpd15547[c] --> (1) cpd00009[c] + (1) cpd00067[c] + (1) cpd15540[c]	0,10000	Fatty Acid Biosynthesis
rxn09107	phosphatidylglycerol phosphate phosphatase (n-C18:1)	3.1.3.27		(1) H2O[c] + (1) Phosphatidylglycerophosphate dioctadec-11-enoyl[c] --> (1) Phosphate[c] + (1) H+[c] + (1) Phosphatidylglycerol dioctadec-11-enoyl[c]	(1) cpd00001[c] + (1) cpd15548[c] --> (1) cpd00009[c] + (1) cpd00067[c] + (1) cpd15541[c]	0,10000	Fatty Acid Biosynthesis
rxn09426	fatty-acyl-ACP synthase (n-C18:1ACP), mitochondrial	Undetermined		(3) NADPH[c] + (1) O2[c] + (4) H+[c] + (1) Malonyl-[acyl-carrier protein][c] + (1) hexadecanoyl-acp[c] --> (3) H2O[c] + (3) NADP[c] + (1) CO2[c] + (1) ACP[c] + (1) Octadecenoyl-ACP[c]	(3) cpd00005[c] + (1) cpd00007[c] + (4) cpd00067[c] + (1) cpd11492[c] + (1) cpd11476[c] --> (3) cpd00001[c] + (3) cpd00006[c] + (1) cpd00011[c] + (1) cpd11493[c] + (1) cpd11825[c]	0,10000	Fatty Acid Biosynthesis
rxn09442	fatty-acyl-ACP synthase (n-C10:0ACP), mitochondrial	Undetermined		(2) NADPH[c] + (3) H+[c] + (1) Octanoyl-ACP[c] + (1) Malonyl-[acyl-carrier protein][c] --> (1) H2O[c] + (2) NADP[c] + (1) CO2[c] + (1) Decanoyl-ACP[c] + (1) ACP[c]	(2) cpd00005[c] + (3) cpd00067[c] + (1) cpd11470[c] + (1) cpd11492[c] --> (1) cpd00001[c] + (2) cpd00006[c] + (1) cpd00011[c] + (1) cpd11474[c] + (1) cpd11493[c]	0,10000	Fatty Acid Biosynthesis
rxn07576	3oxoacyl-acp synthase (c18:0)	2.3.1.41	(sll1069 or slr1332)	(1) hexadecanoyl-acp[c] + (1) Malonyl-[acyl-carrier protein][c] + (1) H+[c] <=> (1) CO2[c] + (1) ACP[c] + (1) 3-Oxostearoyl-[acp][c]	(1) cpd11476[c] + (1) cpd11492[c] + (1) cpd00067[c] <=> (1) cpd00011[c] + (1) cpd11493[c] + (1) cpd14938[c]	-10000,10000	Fatty Acid Biosynthesis
rxn05349	acetyl-CoA:[acyl-carrier-protein] S-acetyltransferase	2.3.1.41	sll1069	(1) Acetyl-CoA[c] + (1) ACP[c] <=> (1) CoA[c] + (1) Acetyl-ACP[c]	(1) cpd00022[c] + (1) cpd11493[c] <=> (1) cpd00010[c] + (1) cpd11494[c]	-10000,10000	Fatty Acid Biosynthesis
rxn05336	(3R)-3-Hydroxypalmitoyl-[acyl-carrier-protein]:NADP+ oxidoreductase	1.1.1.100	slr0886	(1) NADP[c] + (1) R-3-hydroxypalmitoyl-acyl-carrierprotein-[c] <=> (1) NADPH[c] + (1) H+[c] + (1) 3-oxohexadecanoyl-acp[c]	(1) cpd00006[c] + (1) cpd11481[c] <=> (1) cpd00005[c] + (1) cpd00067[c] + (1) cpd11485[c]	-10000,10000	Fatty Acid Biosynthesis
rxn05337	(3R)-3-Hydroxyhexanoyl-[acyl-carrier-protein]:NADP+ oxidoreductase	1.1.1.100	slr0886	(1) NADP[c] + (1) D-3-Hydroxyhexanoyl-[acp][c] <=> (1) NADPH[c] + (1) H+[c] + (1) 3-Oxohexanoyl-[acp][c]	(1) cpd00006[c] + (1) cpd11479[c] <=> (1) cpd00005[c] + (1) cpd00067[c] + (1) cpd11486[c]	-10000,10000	Fatty Acid Biosynthesis
rxn05338	(3R)-3-Hydroxydecanoyl-[acyl-carrier-protein]:NADP+ oxidoreductase	1.1.1.100	slr0886	(1) NADP[c] + (1) (R)-3-Hydroxydecanoyl-[acyl-carrier protein][c] <=> (1) NADPH[c] + (1) H+[c] + (1) 3-oxodecanoyl-acp[c]	(1) cpd00006[c] + (1) cpd11482[c] <=> (1) cpd00005[c] + (1) cpd00067[c] + (1) cpd11487[c]	-10000,10000	Fatty Acid Biosynthesis
rxn05340	(3R)-3-Hydroxydodecanoyl-[acyl-carrier-protein]:NADP+ oxidoreductase	1.1.1.100	slr0886	(1) NADP[c] + (1) D-3-Hydroxydodecanoyl-[acp][c] <=> (1) NADPH[c] + (1) H+[c] + (1) 3-oxododecanoyl-acp[c]	(1) cpd00006[c] + (1) cpd11480[c] <=> (1) cpd00005[c] + (1) cpd00067[c] + (1) cpd11489[c]	-10000,10000	Fatty Acid Biosynthesis
rxn05341	(3R)-3-Hydroxyoctanoyl-[acyl-carrier-protein]:NADP+ oxidoreductase	1.1.1.100	slr0886	(1) NADP[c] + (1) (R)-3-Hydroxyoctanoyl-[acyl-carrier protein][c] <=> (1) NADPH[c] + (1) H+[c] + (1) 3-oxooctanoyl-acp[c]	(1) cpd00006[c] + (1) cpd11483[c] <=> (1) cpd00005[c] + (1) cpd00067[c] + (1) cpd11490[c]	-10000,10000	Fatty Acid Biosynthesis
rxn05339	(3R)-3-Hydroxybutanoyl-[acyl-carrier protein]:NADP+ oxidoreductase	1.1.1.100	slr0886 and slr1994	(1) NADP[c] + (1) (R)-3-Hydroxybutanoyl-[acyl-carrier protein][c] <=> (1) NADPH[c] + (1) H+[c] + (1) Acetoacetyl-ACP[c]	(1) cpd00006[c] + (1) cpd11478[c] <=> (1) cpd00005[c] + (1) cpd00067[c] + (1) cpd11488[c]	-10000,10000	Fatty Acid Biosynthesis
rxn05465	malonyl-ACP:[acyl-carrier-protein] transferase	2.3.1.39	slr2023	(1) Malonyl-CoA[c] + (1) ACP[c] <=> (1) CoA[c] + (1) Malonyl-[acyl-carrier protein][c]	(1) cpd00070[c] + (1) cpd11493[c] <=> (1) cpd00010[c] + (1) cpd11492[c]	-10000,10000	Fatty Acid Biosynthesis
rxn13840	(3R)-3-Hydroxypalmitoyl-[acyl-carrier-protein] hydro-lyase	Undetermined	slr2023	(1) R-3-hydroxypalmitoyl-acyl-carrierprotein-[c] <=> (1) H2O[c] + (1) Hexadecenoyl-ACP[c]	(1) cpd11481[c] <=> (1) cpd00001[c] + (1) cpd15239[c]	-10000,10000	Fatty Acid Biosynthesis
rxn09280	trans-2-decenoyl-ACP isomerase			(1) (2E)-Decenoyl-[acp][c] <=> (1) cis-dec-3-enoyl-[acyl-carrier protein][c]	(1) cpd11475[c] <=> (1) cpd15416[c]	-10000,10000	Fatty Acid Biosynthesis
EX_2-Oxoglutarate	2-Oxoglutarate exchange			(1) 2-Oxoglutarate[e] -->	(1) cpd00024[e] -->	0,10000	Exchange
EX_Acetate	Acetate exchange			(1) Acetate[e] -->	(1) cpd00029[e] -->	0,10000	Exchange
EX_Biomass	Biomass exchange			(1) Biomass[e] -->	(1) cpd11416[e] -->	0,10000	Exchange
EX_Calcium	Calcium exchange			(1) Ca2+[e] -->	(1) cpd00063[e] -->	-200,10000	Exchange
EX_CarbonMonoxide	Carbon monoxide exchange			(1) CO[e] -->	(1) cpd00204[e] -->	0,10000	Exchange
EX_Citrate	Citrate exchange			(1) Citrate[e] -->	(1) cpd00137[e] -->	0,10000	Exchange
EX_CO2	CO2 exchange			(1) CO2[e] -->	(1) cpd00011[e] -->	-200,10000	Exchange
EX_Co2+	Co2+ exchange			(1) Co2+[e] -->	(1) cpd00149[e] -->	-200,10000	Exchange
EX_Cu2+	Cu2+ exchange			(1) Cu2+[e] -->	(1) cpd00058[e] -->	-200,10000	Exchange
EX_Cyanate	Cyanate exchange			(1) Cyanate[e] -->	(1) cpd01015[e] -->	0,10000	Exchange
EX_D-Fructose	D-Fructose exchange			(1) D-Fructose[e] -->	(1) cpd00082[e] -->	0,10000	Exchange
EX_Fe2+	Fe2+ exchange			(1) Fe2+[e] -->	(1) cpd10515[e] -->	-200,10000	Exchange
EX_Fe3+	Fe3+ exchange			(1) Fe3+[e] -->	(1) cpd10516[e] -->	-200,10000	Exchange
EX_Fumarate	Fumarate exchange			(1) Fumarate[e] -->	(1) cpd00106[e] -->	0,10000	Exchange
EX_Glcglyc	2-(beta-D-Glucosyl)-sn-glycerol exchange			(1) 2-(beta-D-Glucosyl)-sn-glycerol[e] -->	(1) cpd08376[e] -->	0,10000	Exchange
EX_Glucose	Glucose exchange			(1) D-Glucose[e] -->	(1) cpd00027[e] -->	0,10000	Exchange
EX_Glycogen	Glycogen exchange			(1) Glycogen[e] -->	(1) cpd00155[e] -->	0,10000	Exchange
EX_H+	Proton exchange			(1) H+[e] -->	(1) cpd00067[e] -->	-200,10000	Exchange
EX_H2	Hydrogen exchange			(1) H2[e] -->	(1) cpd11640[e] -->	0,10000	Exchange
EX_H2CO3	Bicarbonate exchange			(1) Bicarbonate[e] -->	(1) cpd00242[e] -->	0,10000	Exchange
EX_H2O	Water exchange			(1) H2O[e] -->	(1) cpd00001[e] -->	-200,10000	Exchange
EX_Isoprene	Isoprene exchange			(1) Isoprene[e] -->	(1) cpd16336[e] -->	0,10000	Exchange
EX_L-Alanine	L-Alanine exchange			(1) L-Alanine[e] -->	(1) cpd00035[e] -->	0,10000	Exchange
EX_L-Arginine	L-Arginine exchange			(1) L-Arginine[e] -->	(1) cpd00051[e] -->	0,10000	Exchange
EX_L-Glutamate	L-Glutamate exchange			(1) L-Glutamate[e] -->	(1) cpd00023[e] -->	0,10000	Exchange
EX_L-Glutamine	L-Glutamine exchange			(1) L-Glutamine[e] -->	(1) cpd00053[e] -->	0,10000	Exchange
EX_L-Histidine	L-Histidine exchange			(1) L-Histidine[e] -->	(1) cpd00119[e] -->	0,10000	Exchange
EX_L-Leucine	L-Leucine exchange			(1) L-Leucine[e] -->	(1) cpd00107[e] -->	0,10000	Exchange
EX_L-Lysine	L-Lysine exchange			(1) L-Lysine[e] -->	(1) cpd00039[e] -->	0,10000	Exchange
EX_L-Malate	L-Malate exchange			(1) L-Malate[e] -->	(1) cpd00130[e] -->	0,10000	Exchange
EX_L-Proline	L-Proline exchange			(1) L-Proline[e] -->	(1) cpd00129[e] -->	0,10000	Exchange
EX_L-Serine	L-Serine exchange			(1) L-Serine[e] -->	(1) cpd00054[e] -->	0,10000	Exchange
EX_Mg	Magnesium exchange			(1) Mg2+[e] -->	(1) cpd00254[e] -->	-200,10000	Exchange
EX_Mn2+	Mn2+ exchange			(1) Mn2+[e] -->	(1) cpd00030[e] -->	-200,10000	Exchange
EX_Molybdate	Molybdate exchange			(1) Molybdate[e] -->	(1) cpd11574[e] -->	-200,10000	Exchange
EX_NH3	Ammonia exchange			(1) NH3[e] -->	(1) cpd00013[e] -->	0,10000	Exchange
EX_Nickel	Nickel exchange			(1) Ni2+[e] -->	(1) cpd00244[e] -->	-200,10000	Exchange
EX_Nitrate	Nitrate exchange			(1) Nitrate[e] -->	(1) cpd00209[e] -->	-200,10000	Exchange
EX_O2	Oxygen exchange			(1) O2[e] -->	(1) cpd00007[e] -->	0,10000	Exchange
EX_PHO1	Photon exchange			(1) Photosystem 1 photon[e] -->	(1) hvphoton1[e] -->	-200,10000	Exchange
EX_PHO2	Photon exchange			(1) Photosystem 2 photon[e] -->	(1) hvphoton2[e] -->	-200,10000	Exchange
EX_Phosphate	Phosphate exchange			(1) Phosphate[e] -->	(1) cpd00009[e] -->	-200,10000	Exchange
EX_Potassium	Potassium exchange			(1) K+[e] -->	(1) cpd00205[e] -->	-200,10000	Exchange
EX_Putrescine	Putrescine exchange			(1) Putrescine[e] -->	(1) cpd00118[e] -->	0,10000	Exchange
EX_Pyruvate	Pyruvate exchange			(1) Pyruvate[e] -->	(1) cpd00020[e] -->	0,10000	Exchange
EX_Sodium	Sodium exchange			(1) Na+[e] -->	(1) cpd00971[e] -->	-200,10000	Exchange
EX_Spermidine	Spermidine exchange			(1) Spermidine[e] -->	(1) cpd00264[e] -->	0,10000	Exchange
EX_Succinate	Succinate exchange			(1) Succinate[e] -->	(1) cpd00036[e] -->	0,10000	Exchange
EX_Sucrose	Sucrose exchange			(1) Sucrose[e] -->	(1) cpd00076[e] -->	0,10000	Exchange
EX_Sulfate	Sulfate exchange			(1) Sulfate[e] -->	(1) cpd00048[e] -->	-200,10000	Exchange
EX_Urea	Urea exchange			(1) Urea[e] -->	(1) cpd00073[e] -->	0,10000	Exchange
EX_Zinc	Zinc exchange			(1) Zn2+[e] -->	(1) cpd00034[e] -->	-200,10000	Exchange
rxnEntnerD	phosphogluconate dehydratase	4.2.1.12	slr0452	(1) 6-Phospho-D-Gluconate[c] --> (1) 2-Keto-3-deoxy-6-phosphogluconate[c] + (1) H2O[c]	(1) cpd00284[c] --> (1) cpd02711[c] + (1) cpd00001[c]	0,10000	Entner-Doudoroff pathway	[1]
rxn03884	2-dehydro-3-deoxy-D-gluconate-6-phosphate D-glyceraldehyde-3-phosphate-lyase	4.1.2.14/4.1.2.55	sll0107	(1) 2-Keto-3-deoxy-6-phosphogluconate[c] <=> (1) Pyruvate[c] + (1) Glyceraldehyde3-phosphate[c]	(1) cpd02711[c] <=> (1) cpd00020[c] + (1) cpd00102[c]	-10000,10000	Entner-Doudoroff pathway	[1]
rxn02008	UDP-N-acetylmuramoyl-L-alanine:D-glutamate ligase(ADP-forming)	6.3.2.9	sll2010	(1) ATP[c] + (1) D-Glutamate[c] + (1) UDP-N-acetylmuramoyl-L-alanine[c] --> (1) ADP[c] + (1) Phosphate[c] + (1) H+[c] + (1) UDP-N-acetylmuramoyl-L-alanyl-D-glutamate[c]	(1) cpd00002[c] + (1) cpd00186[c] + (1) cpd00890[c] --> (1) cpd00008[c] + (1) cpd00009[c] + (1) cpd00067[c] + (1) cpd00525[c]	0,10000	D-Glutamine and D-glutamate metabolism, Peptidoglycan biosynthesis
rxn02286	UDP-N-acetylmuramate:L-alanine ligase (ADP-forming)	6.3.2.8	slr1423	(1) ATP[c] + (1) L-Alanine[c] + (1) UDP-N-acetylmuramate[c] --> (1) ADP[c] + (1) Phosphate[c] + (1) H+[c] + (1) UDP-N-acetylmuramoyl-L-alanine[c]	(1) cpd00002[c] + (1) cpd00035[c] + (1) cpd00773[c] --> (1) cpd00008[c] + (1) cpd00009[c] + (1) cpd00067[c] + (1) cpd00890[c]	0,10000	D-Glutamine and D-glutamate metabolism, Peptidoglycan biosynthesis
rxn00189	L-Glutamine amidohydrolase	3.5.1.2	slr2079	(1) H2O[c] + (1) L-Glutamine[c] --> (1) NH3[c] + (1) L-Glutamate[c]	(1) cpd00001[c] + (1) cpd00053[c] --> (1) cpd00013[c] + (1) cpd00023[c]	0,10000	D-Glutamine and D-glutamate metabolism, Glutamate metabolism, Nitrogen metabolism
rxn00184	L-Glutamate:NADP+ oxidoreductase (deaminating)	1.4.1.4	slr0710	(1) H2O[c] + (1) NADP[c] + (1) L-Glutamate[c] <=> (1) NADPH[c] + (1) NH3[c] + (1) 2-Oxoglutarate[c] + (1) H+[c]	(1) cpd00001[c] + (1) cpd00006[c] + (1) cpd00023[c] <=> (1) cpd00005[c] + (1) cpd00013[c] + (1) cpd00024[c] + (1) cpd00067[c]	-10000,10000	D-Glutamine and D-glutamate metabolism, Glutamate metabolism, Arginine and proline metabolism, Nitrogen metabolism
rxn00193	L-Glutamate racemase	5.1.1.3	slr1746	(1) L-Glutamate[c] <=> (1) D-Glutamate[c]	(1) cpd00023[c] <=> (1) cpd00186[c]	-10000,10000	D-Glutamine and D-glutamate metabolism, Glutamate metabolism
rxn01153	D-Glutamine amidohydrolase	3.5.1.2	slr2079	(1) H2O[c] + (1) D-Glutamine[c] --> (1) NH3[c] + (1) D-Glutamate[c]	(1) cpd00001[c] + (1) cpd00610[c] --> (1) cpd00013[c] + (1) cpd00186[c]	0,10000	D-Glutamine and D-glutamate metabolism
rxn00851	D-AlanineD-Alanine ligase (ADP-forming)	6.3.2.4	slr1874	(1) ATP[c] + (2) D-Alanine[c] <=> (1) ADP[c] + (1) Phosphate[c] + (1) H+[c] + (1) D-Alanyl-D-alanine[c]	(1) cpd00002[c] + (2) cpd00117[c] <=> (1) cpd00008[c] + (1) cpd00009[c] + (1) cpd00067[c] + (1) cpd00731[c]	-10000,10000	D-Alanine metabolism, Peptidoglycan biosynthesis
rxn00283	L-Alanine racemase	5.1.1.1	slr0827	(1) L-Alanine[c] <=> (1) D-Alanine[c]	(1) cpd00035[c] <=> (1) cpd00117[c]	-10000,10000	D-Alanine metabolism, Alanine and aspartate metabolism
rxn00649	O3-Acetyl-L-serine acetate-lyase (adding hydrogen sulfide)	2.5.1.47	(slr1842 or sll0712)	(1) Hydrogen Sulfide[c] + (1) O-Acetyl-L-serine[c] --> (1) Acetate[c] + (1) H+[c] + (1) L-Cysteine[c]	(1) cpd00239[c] + (1) cpd00722[c] --> (1) cpd00029[c] + (1) cpd00067[c] + (1) cpd00084[c]	0,10000	Cysteine metabolism, Sulfur metabolism
rxn00423	serine O-acetyltransferase	2.3.1.30	slr1348	(1) Acetyl-CoA[c] + (1) L-Serine[c] --> (1) CoA[c] + (1) O-Acetyl-L-serine[c]	(1) cpd00022[c] + (1) cpd00054[c] --> (1) cpd00010[c] + (1) cpd00722[c]	0,10000	Cysteine metabolism, Sulfur metabolism
rxn06435	L-Cysteine:tRNA(Cys) ligase (AMP-forming)	6.1.1.16	slr0958	(1) ATP[c] + (1) H+[c] + (1) L-Cysteine[c] + (1) tRNA(Cys)[c] --> (1) PPi[c] + (1) AMP[c] + (1) L-Cysteinyl-tRNA(Cys)[c]	(1) cpd00002[c] + (1) cpd00067[c] + (1) cpd00084[c] + (1) cpd11910[c] --> (1) cpd00012[c] + (1) cpd00018[c] + (1) cpd12255[c]	0,10000	Cysteine metabolism, Aminoacyl-tRNA biosynthesis
rxn05733	cysteine synthase (Thiosulfate)	2.5.1.47	(slr1842 or sll0712)	(1) Thiosulfate[c] + (1) O-Acetyl-L-serine[c] + (1) Reduced thioredoxin[c] --> (1) Acetate[c] + (1) Sulfite[c] + (1) L-Cysteine[c] + (1) Oxidized thioredoxin[c]	(1) cpd00268[c] + (1) cpd00722[c] + (1) cpd11421[c] --> (1) cpd00029[c] + (1) cpd00081[c] + (1) cpd00084[c] + (1) cpd11420[c]	0,10000	Cysteine metabolism
rxn00826	Glutathione:cystine oxidoreductase	1.8.4.4		(2) Glutathione[c] + (1) L-Cystine[c] --> (2) L-Cysteine[c] + (1) Oxidized glutathione[c]	(2) cpd00042[c] + (1) cpd00381[c] --> (2) cpd00084[c] + (1) cpd00111[c]	0,10000	Cysteine metabolism
rxn02246	O3-Acetyl-L-serine acetate-lyase (adding hydrogen sulfide)	2.5.1.47	(slr1842 or sll0712)	(1) Thiosulfate[c] + (1) O-Acetyl-L-serine[c] <=> (1) Acetate[c] + (1) S-sulfocysteine[c]	(1) cpd00268[c] + (1) cpd00722[c] <=> (1) cpd00029[c] + (1) cpd03456[c]	-10000,10000	Cysteine metabolism
rxn00647	L-Cysteine:2-oxoglutarate aminotransferase	2.6.1.1	sll0402	(1) 2-Oxoglutarate[c] + (1) L-Cysteine[c] <=> (1) L-Glutamate[c] + (1) Mercaptopyruvate[c]	(1) cpd00024[c] + (1) cpd00084[c] <=> (1) cpd00023[c] + (1) cpd00706[c]	-10000,10000	Cysteine metabolism
rxn01416	thiosulfate:cyanide sulfurtranserase	2.8.1.1	slr1184	(1) HCN[c] + (1) Thiosulfate[c] <=> (1) Sulfite[c] + (1) Thiocyanate[c]	(1) cpd00150[c] + (1) cpd00268[c] <=> (1) cpd00081[c] + (1) cpd01211[c]	-10000,10000	Cysteine metabolism
rxn02230	3-mercaptopyruvate:cyanide sulfurtransferase	2.8.1.2	slr1184	(1) HCN[c] + (1) Mercaptopyruvate[c] <=> (1) Pyruvate[c] + (1) H+[c] + (1) Thiocyanate[c]	(1) cpd00150[c] + (1) cpd00706[c] <=> (1) cpd00020[c] + (1) cpd00067[c] + (1) cpd01211[c]	-10000,10000	Cysteine metabolism
rxn09888	cytosine 5-methyltransferase	2.1.1.37	slr0214	(1) S-Adenosyl-L-methionine[c] + (1) Cytosine[c] --> (1) S-Adenosyl-homocysteine[c] + (1) H+[c] + (1) 5-Methylcytosine[c]	(1) cpd00017[c] + (1) cpd00307[c] --> (1) cpd00019[c] + (1) cpd00067[c] + (1) cpd01587[c]	0,10000	Cysteine and Methionine Metabolism
CGPase	Cyanophycinase	Undetermined	slr2001	(1) Cyanophycin dimer[c] + (1) H2O[c] --> (2) L-arginine-L-aspartate monomer of cyanophycin[c]	(1) cyanophy[c] + (1) cpd00001[c] --> (2) argLaspL[c]	0,10000	Cyanophycin Metabolism
CphSArg	Cyanophycin synthase (L-arginine adding)	Undetermined	slr2002	(1) Cyanophycin monomer with aspartate[c] + (1) L-Arginine[c] + (1) ATP[c] --> (1) Cyanophycin dimer[c] + (1) ADP[c] + (1) Phosphate[c] + (1) H+[c]	(1) cpdR-D-D[c] + (1) cpd00051[c] + (1) cpd00002[c] --> (1) cyanophy[c] + (1) cpd00008[c] + (1) cpd00009[c] + (1) cpd00067[c]	0,10000	Cyanophycin Metabolism
CphSAsp	Cyanophycin synthase (L-aspartate adding)	Undetermined	slr2002	(1) L-arginine-L-aspartate monomer of cyanophycin[c] + (1) L-Aspartate[c] + (1) ATP[c] --> (1) Cyanophycin monomer with aspartate[c] + (1) ADP[c] + (1) Phosphate[c] + (1) H+[c]	(1) argLaspL[c] + (1) cpd00041[c] + (1) cpd00002[c] --> (1) cpdR-D-D[c] + (1) cpd00008[c] + (1) cpd00009[c] + (1) cpd00067[c]	0,10000	Cyanophycin Metabolism
MonoCphS	Cyanophycin monomer synthesis	Undetermined	slr2002	(1) L-Arginine[c] + (1) L-Aspartate[c] + (1) ATP[c] --> (1) ADP[c] + (1) L-arginine-L-aspartate monomer of cyanophycin[c] + (1) Phosphate[c] + (1) H+[c]	(1) cpd00051[c] + (1) cpd00041[c] + (1) cpd00002[c] --> (1) cpd00008[c] + (1) argLaspL[c] + (1) cpd00009[c] + (1) cpd00067[c]	0,10000	Cyanophycin Metabolism
rxn00288	Succinate:(acceptor) oxidoreductase	1.3.99.1	sll0823 and sll1625 and slr1233	(1) Fumarate[c] + (1) FADH2[c] --> (1) FAD[c] + (1) Succinate[c]	(1) cpd00106[c] + (1) cpd00982[c] --> (1) cpd00015[c] + (1) cpd00036[c]	0,10000	Citrate Cycle (TCA)
rxn00799	(S)-Malate hydro-lyase	4.2.1.2	slr0018	(1) L-Malate[c] <=> (1) H2O[c] + (1) Fumarate[c]	(1) cpd00130[c] <=> (1) cpd00001[c] + (1) cpd00106[c]	-10000,10000	Citrate cycle (TCA cycle), Reductive carboxylate cycle (CO2 fixation)
rxn01242	pyruvate:[dihydrolipoyllysine-residue	1.2.4.1	sll1721	(1) Pyruvate[c] + (1) H+[c] + (1) Lipoamide[c] --> (1) CO2[c] + (1) S-Acetyldihydrolipoamide[c]	(1) cpd00020[c] + (1) cpd00067[c] + (1) cpd00213[c] --> (1) cpd00011[c] + (1) cpd00836[c]	0,10000	Citrate cycle (TCA cycle), Pyruvate metabolism, Valine,leucine and isoleucine degradation, Glycolysis / Gluconeogenesis
rxn01241	Dihydrolipoamide:NAD+ oxidoreductase	1.8.1.4	slr1096	(1) NAD[c] + (1) Dihydrolipoamide[c] <=> (1) NADH[c] + (1) H+[c] + (1) Lipoamide[c]	(1) cpd00003[c] + (1) cpd00449[c] <=> (1) cpd00004[c] + (1) cpd00067[c] + (1) cpd00213[c]	-10000,10000	Citrate cycle (TCA cycle), Pyruvate metabolism, Valine,leucine and isoleucine degradation, Glycolysis / Gluconeogenesis
rxn01871	acetyl-CoA:enzyme N6-(dihydrolipoyl)lysine S-acetyltransferase	2.3.1.12	sll1841	(1) Acetyl-CoA[c] + (1) Dihydrolipoamide[c] <=> (1) CoA[c] + (1) S-Acetyldihydrolipoamide[c]	(1) cpd00022[c] + (1) cpd00449[c] <=> (1) cpd00010[c] + (1) cpd00836[c]	-10000,10000	Citrate cycle (TCA cycle), Pyruvate metabolism, Glycolysis / Gluconeogenesis
rxn00154	pyruvate:NAD+ 2-oxidoreductase (CoA-acetylating)	1.2.4.1 and 1.8.1.4 and 2.3.1.12	(sll1721 and sll1841 and slr1096)	(1) NAD[c] + (1) CoA[c] + (1) Pyruvate[c] --> (1) NADH[c] + (1) CO2[c] + (1) Acetyl-CoA[c]	(1) cpd00003[c] + (1) cpd00010[c] + (1) cpd00020[c] --> (1) cpd00004[c] + (1) cpd00011[c] + (1) cpd00022[c]	0,10000	Citrate cycle (TCA cycle)
rxn00508	Succinate-semialdehyde:NAD+ oxidoreductase	1.2.1.16	slr0370	(1) H2O[c] + (1) NAD[c] + (1) 4-Oxobutanoate[c] --> (1) NADH[c] + (1) Succinate[c] + (2) H+[c]	(1) cpd00001[c] + (1) cpd00003[c] + (1) cpd00199[c] --> (1) cpd00004[c] + (1) cpd00036[c] + (2) cpd00067[c]	0,10000	Citrate cycle (TCA cycle)
rxn00199	Oxalosuccinate:NADP+ oxidoreductase (decarboxylating)	1.1.1.42	slr1289	(1) H+[c] + (1) Oxalosuccinate[c] --> (1) CO2[c] + (1) 2-Oxoglutarate[c]	(1) cpd00067[c] + (1) cpd03187[c] --> (1) cpd00011[c] + (1) cpd00024[c]	0,10000	Citrate cycle (TCA cycle)
rxn00974	citrate hydro-lyase	4.2.1.3	slr0665	(1) Citrate[c] <=> (1) H2O[c] + (1) cis-Aconitate[c]	(1) cpd00137[c] <=> (1) cpd00001[c] + (1) cpd00331[c]	-10000,10000	Citrate cycle (TCA cycle)
rxn01387	Isocitrate:NADP+ oxidoreductase (decarboxylating)	1.1.1.42	slr1289	(1) NADP[c] + (1) Isocitrate[c] <=> (1) NADPH[c] + (1) H+[c] + (1) Oxalosuccinate[c]	(1) cpd00006[c] + (1) cpd00260[c] <=> (1) cpd00005[c] + (1) cpd00067[c] + (1) cpd03187[c]	-10000,10000	Citrate cycle (TCA cycle)
rxn05794	Oxalosuccinate:NADP+ oxidoreductase (decarboxylating)	1.1.1.42	slr1289	(1) NADP[c] + (2) H+[c] + (1) Oxalosuccinate[c] <=> (1) NADPH[c] + (1) CO2[c] + (1) 2-Oxoglutarate[c]	(1) cpd00006[c] + (2) cpd00067[c] + (1) cpd03187[c] <=> (1) cpd00005[c] + (1) cpd00011[c] + (1) cpd00024[c]	-10000,10000	Citrate cycle (TCA cycle)
BCAROHX	beta-carotene hydroxylase		sll1468	(1) H+[c] + (1) O2[c] + (1) NADPH[c] + (1) beta-Carotene[c] --> (1) H2O[c] + (1) NADP[c] + (1) beta-Cryptoxanthin[c]	(1) cpd00067[c] + (1) cpd00007[c] + (1) cpd00005[c] + (1) cpd01420[c] --> (1) cpd00001[c] + (1) cpd00006[c] + (1) cpd05498[c]	0,10000	Carotenoid biosynthesis - General
BCAROHX2	beta-carotene hydroxylase		sll1468	(1) H+[c] + (1) O2[c] + (1) NADPH[c] + (1) beta-Cryptoxanthin[c] --> (1) H2O[c] + (1) NADP[c] + (1) Zeaxanthin[c]	(1) cpd00067[c] + (1) cpd00007[c] + (1) cpd00005[c] + (1) cpd05498[c] --> (1) cpd00001[c] + (1) cpd00006[c] + (1) cpd03637[c]	0,10000	Carotenoid biosynthesis - General
rxn06790	zeta-Carotene, hydrogen-donor:oxygen oxidoreductase	1.14.99.30	slr0940	(1) H+[c] + (1) O2[c] + (1) NADPH[c] + (1) zeta-Carotene[c] --> (2) H2O[c] + (1) NADP[c] + (1) Neurosporene[c]	(1) cpd00067[c] + (1) cpd00007[c] + (1) cpd00005[c] + (1) cpd03215[c] --> (2) cpd00001[c] + (1) cpd00006[c] + (1) cpd03216[c]	0,10000	Carotenoid biosynthesis - General
rxn06792	Neurosporene, hydrogen-donor:oxygen oxidoreductase	1.14.99.30	slr0940	(1) H+[c] + (1) O2[c] + (1) NADPH[c] + (1) Neurosporene[c] --> (2) H2O[c] + (1) NADP[c] + (1) Lycopene[c]	(1) cpd00067[c] + (1) cpd00007[c] + (1) cpd00005[c] + (1) cpd03216[c] --> (2) cpd00001[c] + (1) cpd00006[c] + (1) cpd03217[c]	0,10000	Carotenoid biosynthesis - General
PHYTEDH1	Phytoene dehydrogenase	1.14.99.-	slr1254	(1) NAD[c] + (1) Phytoene[c] --> (1) H+[c] + (1) NADH[c] + (1) Phytofluene[c]	(1) cpd00003[c] + (1) cpd03205[c] --> (1) cpd00067[c] + (1) cpd00004[c] + (1) cpd03206[c]	0,10000	Carotenoid biosynthesis - General
PHYTEDH2	Phytoene dehydrogenase(2)	1.14.99.-	slr1254	(1) NADP[c] + (1) Phytoene[c] --> (1) H+[c] + (1) NADPH[c] + (1) Phytofluene[c]	(1) cpd00006[c] + (1) cpd03205[c] --> (1) cpd00067[c] + (1) cpd00005[c] + (1) cpd03206[c]	0,10000	Carotenoid biosynthesis - General
PHYTFDH1	Phytofluene dehydrogenase	1.14.99.-	slr1254	(1) NAD[c] + (1) Phytofluene[c] --> (1) H+[c] + (1) NADH[c] + (1) zeta-Carotene[c]	(1) cpd00003[c] + (1) cpd03206[c] --> (1) cpd00067[c] + (1) cpd00004[c] + (1) cpd03215[c]	0,10000	Carotenoid biosynthesis - General
PHYTFDH2	Phytofluene dehydrogenase(2)	1.14.99.-	slr1254	(1) NADP[c] + (1) Phytofluene[c] --> (1) H+[c] + (1) NADPH[c] + (1) zeta-Carotene[c]	(1) cpd00006[c] + (1) cpd03206[c] --> (1) cpd00067[c] + (1) cpd00005[c] + (1) cpd03215[c]	0,10000	Carotenoid biosynthesis - General
rxn01489	Geranylgeranyl-diphosphate:geranylgeranyl-diphosphate	2.5.1.32	slr1255	(2) Geranylgeranyl diphosphate[c] --> (1) PPi[c] + (1) Prephytoene diphosphate[c]	(2) cpd00289[c] --> (1) cpd00012[c] + (1) cpd02168[c]	0,10000	Carotenoid biosynthesis - General
rxn03646	rxn03646			(1) Lycopene[c] --> (1) gamma-Carotene[c]	(1) cpd03217[c] --> (1) cpd03220[c]	0,10000	Carotenoid biosynthesis - General
rxn07385	rxn07385			(1) (2'S)-Deoxymyxol 2'-(2,4-di-O-methyl-alpha-L-fucoside)[c] --> (1) (3R,2'S)-Myxol 2'-(2,4-di-O-methyl-alpha-L-fucoside)[c]	(1) cpd14663[c] --> (1) cpd14665[c]	0,10000	Carotenoid biosynthesis - General
rxn07643	rxn07643			(1) gamma-Carotene[c] --> (1) (2'S)-Deoxymyxol 2'-(2,4-di-O-methyl-alpha-L-fucoside)[c]	(1) cpd03220[c] --> (1) cpd14663[c]	0,10000	Carotenoid biosynthesis - General
rxn11573	rxn11573	Undetermined		(1) Lycopene[c] --> (1) beta-Carotene[c]	(1) cpd03217[c] --> (1) cpd01420[c]	0,10000	Carotenoid biosynthesis - General
rxn11574	rxn11574			(1) gamma-Carotene[c] --> (1) beta-Carotene[c]	(1) cpd03220[c] --> (1) cpd01420[c]	0,10000	Carotenoid biosynthesis - General
R09703	15-cis-phytoene:acceptor oxidoreductase	5.2.1.13	sll0033	(1) 15-cis-Phytoene[c] <=> (1) 3,4-Dehydrolycopene[c] + (10) H+[c]	(1) cpd03211[c] <=> (1) cpd14598[c] + (10) cpd00067[c]	-10000,10000	Carotenoid biosynthesis - General
rxn00251	Orthophosphate:oxaloacetate carboxyl-lyase (phosphorylating)	4.1.1.31	sll0920	(1) H2O[c] + (1) CO2[c] + (1) Phosphoenolpyruvate[c] --> (1) Phosphate[c] + (1) Oxaloacetate[c] + (2) H+[c]	(1) cpd00001[c] + (1) cpd00011[c] + (1) cpd00061[c] --> (1) cpd00009[c] + (1) cpd00032[c] + (2) cpd00067[c]	0,10000	Carbon fixation in photosynthetic organisms, Pyruvate metabolism, Reductive carboxylate cycle (CO2 fixation)
rxn00148	ATP:pyruvate O2-phosphotransferase	2.7.1.40	(sll0587 or sll1275)	(1) ADP[c] + (1) Phosphoenolpyruvate[c] --> (1) ATP[c] + (1) Pyruvate[c]	(1) cpd00008[c] + (1) cpd00061[c] --> (1) cpd00002[c] + (1) cpd00020[c]	0,10000	Carbon fixation in photosynthetic organisms, Pyruvate metabolism, Purine metabolism, Glycolysis / Gluconeogenesis
rxn01116	D-Ribulose-5-phosphate 3-epimerase	5.1.3.1	sll0807	(1) D-Ribulose5-phosphate[c] <=> (1) D-Xylulose5-phosphate[c]	(1) cpd00171[c] <=> (1) cpd00198[c]	-10000,10000	Carbon fixation in photosynthetic organisms, Pentose phosphate pathway, Pentose and glucuronate interconversions
rxn00549	D-Fructose-1,6-bisphosphate 1-phosphohydrolase	3.1.3.11	(slr0952 or slr2094)	(1) H2O[c] + (1) D-fructose-1,6-bisphosphate[c] --> (1) Phosphate[c] + (1) H+[c] + (1) D-fructose-6-phosphate[c]	(1) cpd00001[c] + (1) cpd00290[c] --> (1) cpd00009[c] + (1) cpd00067[c] + (1) cpd00072[c]	0,10000	Carbon fixation in photosynthetic organisms, Pentose phosphate pathway, Fructose and mannose metabolism, Glycolysis / Gluconeogenesis
rxn00786	D-Fructose-1,6-bisphosphate D-glyceraldehyde-3-phosphate-lyase	4.1.2.13	(slr0943 or sll0018)	(1) Glycerone-phosphate[c] + (1) Glyceraldehyde3-phosphate[c] <=> (1) D-fructose-1,6-bisphosphate[c]	(1) cpd00095[c] + (1) cpd00102[c] <=> (1) cpd00290[c]	-10000,10000	Carbon fixation in photosynthetic organisms, Pentose phosphate pathway, Fructose and mannose metabolism, Glycolysis / Gluconeogenesis
rxn01343	ATP:Sedoheptulose 7-phosphate 1-phosphotransferase	2.7.1.11	sll1196	(1) ATP[c] + (1) Sedoheptulose7-phosphate[c] --> (1) ADP[c] + (1) Sedoheptulose 1,7-bisphosphate[c]	(1) cpd00002[c] + (1) cpd00238[c] --> (1) cpd00008[c] + (1) cpd00349[c]	0,10000	Carbon fixation in photosynthetic organisms, Pentose phosphate pathway
rxn00777	D-Ribose-5-phosphate ketol-isomerase	5.3.1.6	(slr0194 or ssl2153)	(1) ribose-5-phosphate[c] <=> (1) D-Ribulose5-phosphate[c]	(1) cpd00101[c] <=> (1) cpd00171[c]	-10000,10000	Carbon fixation in photosynthetic organisms, Pentose phosphate pathway
rxn00785	D-Fructose 6-phosphate:D-glyceraldehyde-3-phosphate glycolaldehyde	2.2.1.1	sll1070	(1) D-fructose-6-phosphate[c] + (1) Glyceraldehyde3-phosphate[c] <=> (1) D-Xylulose5-phosphate[c] + (1) D-Erythrose4-phosphate[c]	(1) cpd00072[c] + (1) cpd00102[c] <=> (1) cpd00198[c] + (1) cpd00236[c]	-10000,10000	Carbon fixation in photosynthetic organisms, Pentose phosphate pathway
rxn01200	Sedoheptulose-7-phosphate:D-glyceraldehyde-3-phosphate	2.2.1.1	sll1070	(1) Glyceraldehyde3-phosphate[c] + (1) Sedoheptulose7-phosphate[c] <=> (1) ribose-5-phosphate[c] + (1) D-Xylulose5-phosphate[c]	(1) cpd00102[c] + (1) cpd00238[c] <=> (1) cpd00101[c] + (1) cpd00198[c]	-10000,10000	Carbon fixation in photosynthetic organisms, Pentose phosphate pathway
rxn00747	D-Glyceraldehyde-3-phosphate ketol-isomerase	5.3.1.1	slr0783	(1) Glyceraldehyde3-phosphate[c] <=> (1) Glycerone-phosphate[c]	(1) cpd00102[c] <=> (1) cpd00095[c]	-10000,10000	Carbon fixation in photosynthetic organisms, Inositol metabolism, Fructose and mannose metabolism, Glycolysis / Gluconeogenesis
rxn00248	(S)-malate:NAD+ oxidoreductase	1.1.1.37	sll0891	(1) NAD[c] + (1) L-Malate[c] <=> (1) NADH[c] + (1) Oxaloacetate[c] + (1) H+[c]	(1) cpd00003[c] + (1) cpd00130[c] <=> (1) cpd00004[c] + (1) cpd00032[c] + (1) cpd00067[c]	-10000,10000	Carbon fixation in photosynthetic organisms, Glyoxylate and dicarboxylate metabolism, Citrate cycle (TCA cycle), Pyruvate metabolism, Reductive carboxylate cycle (CO2 fixation)
rxn00782	D-Glyceraldehyde-3-phosphate:NADP+ oxidoreductase(phosphorylating)	1.2.1.59	sll1342	(1) NADPH[c] + (1) 1,3-Bisphospho-D-glycerate[c] --> (1) NADP[c] + (1) Phosphate[c] + (1) Glyceraldehyde3-phosphate[c]	(1) cpd00005[c] + (1) cpd00203[c] --> (1) cpd00006[c] + (1) cpd00009[c] + (1) cpd00102[c]	0,10000	Carbon fixation in photosynthetic organisms, Glycolysis / Gluconeogenesis
rxn00781	D-Glyceraldehyde-3-phosphate:NAD+ oxidoreductase(phosphorylating)	1.2.1.12	slr0884	(1) NAD[c] + (1) Phosphate[c] + (1) Glyceraldehyde3-phosphate[c] --> (1) NADH[c] + (1) 1,3-Bisphospho-D-glycerate[c]	(1) cpd00003[c] + (1) cpd00009[c] + (1) cpd00102[c] --> (1) cpd00004[c] + (1) cpd00203[c]	0,10000	Carbon fixation in photosynthetic organisms, Glycolysis / Gluconeogenesis
rxn01100	ATP:3-phospho-D-glycerate 1-phosphotransferase	2.7.2.3	slr0394	(1) ATP[c] + (1) H+[c] + (1) 3-Phosphoglycerate[c] <=> (1) ADP[c] + (1) 1,3-Bisphospho-D-glycerate[c]	(1) cpd00002[c] + (1) cpd00067[c] + (1) cpd00169[c] <=> (1) cpd00008[c] + (1) cpd00203[c]	-10000,10000	Carbon fixation in photosynthetic organisms, Glycolysis / Gluconeogenesis
rxn00018	D-Ribulose 1,5-bisphosphate carboxy-lyase (dimerizing)	4.1.1.39	(slr0009) and (slr0012)	(1) H2O[ca] + (1) CO2[ca] + (1) D-Ribulose 1,5-bisphosphate[ca] --> (2) H+[ca] + (2) 3-Phosphoglycerate[ca]	(1) cpd00001[ca] + (1) cpd00011[ca] + (1) cpd00871[ca] --> (2) cpd00067[ca] + (2) cpd00169[ca]	0,10000	Carbon fixation in photosynthetic organisms
rxn01345	Sedoheptulose 1,7-bisphosphate 1-phosphohydrolase	3.1.3.37	(slr0952 or slr2094)	(1) H2O[c] + (1) Sedoheptulose 1,7-bisphosphate[c] --> (1) Phosphate[c] + (1) H+[c] + (1) Sedoheptulose7-phosphate[c]	(1) cpd00001[c] + (1) cpd00349[c] --> (1) cpd00009[c] + (1) cpd00067[c] + (1) cpd00238[c]	0,10000	Carbon fixation in photosynthetic organisms
rxn01111	ATP:D-ribulose-5-phosphate 1-phosphotransferase	2.7.1.19	sll1525	(1) ATP[c] + (1) D-Ribulose5-phosphate[c] --> (1) ADP[c] + (1) D-Ribulose 1,5-bisphosphate[c]	(1) cpd00002[c] + (1) cpd00171[c] --> (1) cpd00008[c] + (1) cpd00871[c]	0,10000	Carbon fixation in photosynthetic organisms
CA	Carbonic anhydrase	4.2.1.1	slr0051 or slr1347	(1) Bicarbonate[ca] + (1) H+[ca] --> (1) H2O[ca] + (1) CO2[ca]	(1) cpd00242[ca] + (1) cpd00067[ca] --> (1) cpd00001[ca] + (1) cpd00011[ca]	0,10000	Carbon fixation in photosynthetic organisms
rxn01334	Sedoheptulose 1,7-bisphosphate D-glyceraldehyde-3-phosphate-lyase		(slr0943) or (sll0018)	(1) Sedoheptulose 1,7-bisphosphate[c] <=> (1) Glycerone-phosphate[c] + (1) D-Erythrose4-phosphate[c]	(1) cpd00349[c] <=> (1) cpd00095[c] + (1) cpd00236[c]	-10000,10000	Carbon fixation in photosynthetic organisms
rxn00509	Succinate-semialdehyde:NADP+ oxidoreductase	1.2.1.16	slr0370	(1) H2O[c] + (1) NADP[c] + (1) 4-Oxobutanoate[c] <=> (1) NADPH[c] + (1) Succinate[c] + (2) H+[c]	(1) cpd00001[c] + (1) cpd00006[c] + (1) cpd00199[c] <=> (1) cpd00005[c] + (1) cpd00036[c] + (2) cpd00067[c]	-10000,10000	Butanoate metabolism, Glutamate metabolism, Tyrosine metabolism
rxn01204	4-Aminobutanoate:2-oxoglutarate aminotransferase	2.6.1.19	(slr1022) or (sll0017)	(1) 2-Oxoglutarate[c] + (1) GABA[c] --> (1) L-Glutamate[c] + (1) 4-Oxobutanoate[c]	(1) cpd00024[c] + (1) cpd00281[c] --> (1) cpd00023[c] + (1) cpd00199[c]	0,10000	Butanoate metabolism, Glutamate metabolism
rxn00194	L-Glutamate 1-carboxy-lyase	4.1.1.15	sll1641	(1) L-Glutamate[c] + (1) H+[c] --> (1) CO2[c] + (1) GABA[c]	(1) cpd00023[c] + (1) cpd00067[c] --> (1) cpd00011[c] + (1) cpd00281[c]	0,10000	Butanoate metabolism, Glutamate metabolism
rxn00989	Acetoacetyl-CoA hydrolase	3.1.2.11		(1) H2O[c] + (1) Acetoacetyl-CoA[c] --> (1) CoA[c] + (1) H+[c] + (1) Acetoacetate[c]	(1) cpd00001[c] + (1) cpd00279[c] --> (1) cpd00010[c] + (1) cpd00067[c] + (1) cpd00142[c]	0,10000	Butanoate metabolism
rxn01453	(R)-3-Hydroxybutanoyl-CoA:NADP+ oxidoreductase		slr1994	(1) NADP[c] + (1) (R)-3-Hydroxybutanoyl-CoA[c] <=> (1) NADPH[c] + (1) H+[c] + (1) Acetoacetyl-CoA[c]	(1) cpd00006[c] + (1) cpd02234[c] <=> (1) cpd00005[c] + (1) cpd00067[c] + (1) cpd00279[c]	-10000,10000	Butanoate metabolism
rxn00968	2,4'-dihydroxyacetophenone oxidoreductase (C-C-bond-cleaving)	3.1.3.4		(1) O2[c] + (1) Resacetophenone[c] --> (1) Formate[c] + (2) H+[c] + (1) 4-Hydroxybenzoate[c]	(1) cpd00007[c] + (1) cpd02300[c] --> (1) cpd00047[c] + (2) cpd00067[c] + (1) cpd00136[c]	0,10000	Bisphenol A degradation
rxn08180	Biotin synthase	2.8.1.6	slr1364	(1) S-Adenosyl-L-methionine[c] + (1) Sulfur[c] + (1) Dethiobiotin[c] --> (1) L-Methionine[c] + (1) H+[c] + (1) Biotin[c] + (1) 5'-Deoxyadenosine[c]	(1) cpd00017[c] + (1) cpd00074[c] + (1) cpd01311[c] --> (1) cpd00060[c] + (1) cpd00067[c] + (1) cpd00104[c] + (1) cpd03091[c]	0,10000	Biotin metabolism
rxn02277	7,8-Diaminononanoate:carbon-dioxide cyclo-ligase	6.3.3.3	slr0523	(1) ATP[c] + (1) CO2[c] + (1) 7-8-Diaminononanoate[c] <=> (1) ADP[c] + (1) Phosphate[c] + (3) H+[c] + (1) Dethiobiotin[c]	(1) cpd00002[c] + (1) cpd00011[c] + (1) cpd00764[c] <=> (1) cpd00008[c] + (1) cpd00009[c] + (3) cpd00067[c] + (1) cpd01311[c]	-10000,10000	Biotin metabolism
rxn02297	6-Carboxyhexanoyl-CoA:L-alanine C-carboxyhexanoyltransferase	2.3.1.47	slr0917	(1) L-Alanine[c] + (1) H+[c] + (1) Pimeloyl-CoA[c] <=> (1) CoA[c] + (1) CO2[c] + (1) 8-Amino-7-oxononanoate[c]	(1) cpd00035[c] + (1) cpd00067[c] + (1) cpd00782[c] <=> (1) cpd00010[c] + (1) cpd00011[c] + (1) cpd00800[c]	-10000,10000	Biotin metabolism
rxn03958	1-Deoxy-D-xylulose-5-phosphate isomeroreductase	1.1.1.267	sll0019	(1) NADPH[c] + (1) H+[c] + (1) 1-deoxy-D-xylulose5-phosphate[c] --> (1) NADP[c] + (1) 2-C-methyl-D-erythritol4-phosphate[c]	(1) cpd00005[c] + (1) cpd00067[c] + (1) cpd08289[c] --> (1) cpd00006[c] + (1) cpd08286[c]	0,10000	Biosynthesis of steroids
rxn03063	S-Adenosyl-L-methionine:zymosterol C-methyltransferase	2.1.1.41	sll0418	(1) S-Adenosyl-L-methionine[c] + (1) Zymosterol[c] --> (1) S-Adenosyl-homocysteine[c] + (1) H+[c] + (1) Fecosterol[c]	(1) cpd00017[c] + (1) cpd03221[c] --> (1) cpd00019[c] + (1) cpd00067[c] + (1) cpd02755[c]	0,10000	Biosynthesis of steroids
rxn00498	Farnesyl-diphosphate:farnesyl-diphosphate farnesyltransferase	2.5.1.21	sll0513	(2) Farnesyldiphosphate[c] --> (1) PPi[c] + (1) Presqualene diphosphate[c]	(2) cpd00350[c] --> (1) cpd00012[c] + (1) cpd02169[c]	0,10000	Biosynthesis of steroids
rxn02062	Presqualene diphosphate:farnesyl-diphosphate farnesyltransferase	2.5.1.21	sll0513	(1) NADPH[c] + (1) H+[c] + (1) Presqualene diphosphate[c] --> (1) NADP[c] + (1) PPi[c] + (1) Supraene[c]	(1) cpd00005[c] + (1) cpd00067[c] + (1) cpd02169[c] --> (1) cpd00006[c] + (1) cpd00012[c] + (1) cpd00559[c]	0,10000	Biosynthesis of steroids
rxn03908	ATP: 4-(Cytidine 5'-diphospho)-2-C-methyl-D-erythritol	2.7.1.148	sll0711	(1) ATP[c] + (1) 4--cytidine5-diphospho-2-C-methyl-D-erythritol[c] --> (1) ADP[c] + (1) 2-phospho-4--cytidine5-diphospho-2-C-methyl-D-erythritol[c]	(1) cpd00002[c] + (1) cpd08287[c] --> (1) cpd00008[c] + (1) cpd08288[c]	0,10000	Biosynthesis of steroids
rxn01487	rxn01487	1.3.1.83	sll1091	(3) NADPH[c] + (3) H+[c] + (1) Geranylgeranyl diphosphate[c] --> (3) NADP[c] + (1) Phytyl diphosphate[c]	(3) cpd00005[c] + (3) cpd00067[c] + (1) cpd00289[c] --> (3) cpd00006[c] + (1) cpd03214[c]	0,10000	Biosynthesis of steroids
rxn03909	1-Deoxy-D-xylulose-5-phosphate pyruvate-lyase (carboxylating)	2.2.1.7	sll1945	(1) Pyruvate[c] + (1) H+[c] + (1) Glyceraldehyde3-phosphate[c] --> (1) CO2[c] + (1) 1-deoxy-D-xylulose5-phosphate[c]	(1) cpd00020[c] + (1) cpd00067[c] + (1) cpd00102[c] --> (1) cpd00011[c] + (1) cpd08289[c]	0,10000	Biosynthesis of steroids
rxn04113	isopentenyl-diphosphate:NAD(P)+ oxidoreductase	1.17.1.2	slr0348	(1) NADPH[c] + (1) H+[c] + (1) 1-Hydroxy-2-methyl-2-butenyl 4-diphosphate[c] --> (1) H2O[c] + (1) NADP[c] + (1) Isopentenyldiphosphate[c]	(1) cpd00005[c] + (1) cpd00067[c] + (1) cpd08615[c] --> (1) cpd00001[c] + (1) cpd00006[c] + (1) cpd00113[c]	0,10000	Biosynthesis of steroids
rxn03907	CTP: 2-C-Methyl-D-erythritol 4-phosphate cytidylyltransferase	2.7.7.60	slr0951	(1) CTP[c] + (1) 2-C-methyl-D-erythritol4-phosphate[c] --> (1) PPi[c] + (1) 4--cytidine5-diphospho-2-C-methyl-D-erythritol[c]	(1) cpd00052[c] + (1) cpd08286[c] --> (1) cpd00012[c] + (1) cpd08287[c]	0,10000	Biosynthesis of steroids
rxn03910	2-Phospho-4-(cytidine 5'-diphospho)-2-C-methyl-D-erythritol	4.6.1.12	slr1542	(1) 2-phospho-4--cytidine5-diphospho-2-C-methyl-D-erythritol[c] --> (1) CMP[c] + (1) 2-C-methyl-D-erythritol2-4-cyclodiphosphate[c]	(1) cpd08288[c] --> (1) cpd00046[c] + (1) cpd08301[c]	0,10000	Biosynthesis of steroids
rxn07334	tocopherol cyclase (d)		slr1737	(1) 2-Methyl-6-phytylquinol[c] --> (1) delta-Tocopherol[c]	(1) cpd14613[c] --> (1) cpd09850[c]	0,10000	Biosynthesis of steroids
rxn07332	rxn07332	2.1.1.-	sll0418	(1) S-Adenosyl-L-methionine[c] + (1) 2-Methyl-6-phytylquinol[c] <=> (1) S-Adenosyl-homocysteine[c] + (1) H+[c] + (1) 2,3-Dimethyl-5-phytylquinol[c]	(1) cpd00017[c] + (1) cpd14613[c] <=> (1) cpd00019[c] + (1) cpd00067[c] + (1) cpd14614[c]	-10000,10000	Biosynthesis of steroids
rxn05004	S-adenosyl-L-methionine:gamma-tocopherol 5-O-methyltransferase	2.1.1.95	slr0089	(1) S-Adenosyl-L-methionine[c] + (1) gamma-Tocopherol[c] <=> (1) S-Adenosyl-homocysteine[c] + (1) H+[c] + (1) Vitamin E[c]	(1) cpd00017[c] + (1) cpd01631[c] <=> (1) cpd00019[c] + (1) cpd00067[c] + (1) cpd01628[c]	-10000,10000	Biosynthesis of steroids
rxn07335	tocopherol O-methyltransferase(2)	2.1.1.95	slr0089	(1) S-Adenosyl-L-methionine[c] + (1) delta-Tocopherol[c] <=> (1) S-Adenosyl-homocysteine[c] + (1) H+[c] + (1) beta-Tocopherol[c]	(1) cpd00017[c] + (1) cpd09850[c] <=> (1) cpd00019[c] + (1) cpd00067[c] + (1) cpd09851[c]	-10000,10000	Biosynthesis of steroids
rxn01058	Cholesterol:NAD+ delta7-oxidoreductase	1.3.1.21	slr1307	(1) NAD[c] + (1) Cholesterol[c] <=> (1) NADH[c] + (1) H+[c] + (1) Provitamin D3[c]	(1) cpd00003[c] + (1) cpd00160[c] <=> (1) cpd00004[c] + (1) cpd00067[c] + (1) cpd00857[c]	-10000,10000	Biosynthesis of steroids
rxn07333	tocopherol cyclase (g)		slr1737	(1) 2,3-Dimethyl-5-phytylquinol[c] <=> (1) gamma-Tocopherol[c]	(1) cpd14614[c] <=> (1) cpd01631[c]	-10000,10000	Biosynthesis of steroids
rxn00346	L-Aspartate 1-carboxy-lyase	4.1.1.11	sll0892	(1) L-Aspartate[c] + (1) H+[c] --> (1) CO2[c] + (1) beta-Alanine[c]	(1) cpd00041[c] + (1) cpd00067[c] --> (1) cpd00011[c] + (1) cpd00085[c]	0,10000	beta-Alanine metabolism, Alanine and aspartate metabolism
rxn00653	beta-Aminopropion aldehyde:NAD+ oxidoreductase	1.2.1.3	slr0091	(1) NADH[c] + (2) H+[c] + (1) beta-Alanine[c] --> (1) H2O[c] + (1) NAD[c] + (1) 3-Aminopropanal[c]	(1) cpd00004[c] + (2) cpd00067[c] + (1) cpd00085[c] --> (1) cpd00001[c] + (1) cpd00003[c] + (1) cpd01504[c]	0,10000	beta-Alanine metabolism
rxn00643	GDPmannose 3,5-epimerase	5.1.3.18	sll1213	(1) GDP-mannose[c] <=> (1) GDP-L-galactose[c]	(1) cpd00083[c] <=> (1) cpd01536[c]	-10000,10000	Ascorbate and aldarate metabolism
rxn08171	arsenate reductase	1.20.4.1	sll5104 and slr0946	(2) Glutathione[c] + (2) H+[c] + (1) Arsenate[c] <=> (1) H2O[c] + (1) Oxidized glutathione[c] + (1) Arsenite[c]	(2) cpd00042[c] + (2) cpd00067[c] + (1) cpd01048[c] <=> (1) cpd00001[c] + (1) cpd00111[c] + (1) cpd04098[c]	-10000,10000	Arsenate metabolism
rxn06432	L-Arginine:tRNA(Arg) ligase (AMP-forming)	6.1.1.19	sll0502	(1) ATP[c] + (1) L-Arginine[c] + (1) H+[c] + (1) tRNA(Arg)[c] --> (1) PPi[c] + (1) AMP[c] + (1) L-Arginyl-tRNA[c]	(1) cpd00002[c] + (1) cpd00051[c] + (1) cpd00067[c] + (1) cpd11907[c] --> (1) cpd00012[c] + (1) cpd00018[c] + (1) cpd12036[c]	0,10000	Arginine and proline metabolism, Aminoacyl-tRNA biosynthesis
rxn06445	L-Proline:tRNA(Pro) ligase (AMP-forming)	6.1.1.15	sll1425	(1) ATP[c] + (1) H+[c] + (1) L-Proline[c] + (1) tRNA(Pro)[c] --> (1) PPi[c] + (1) AMP[c] + (1) L-Prolyl-tRNA(Pro)[c]	(1) cpd00002[c] + (1) cpd00067[c] + (1) cpd00129[c] + (1) cpd11920[c] --> (1) cpd00012[c] + (1) cpd00018[c] + (1) cpd12164[c]	0,10000	Arginine and proline metabolism, Aminoacyl-tRNA biosynthesis
rxn02339	4-Hydroxy-L-glutamate:2-oxoglutarate aminotransferase	2.6.1.1	(sll0402) or (slr0036)	(1) 2-Oxoglutarate[c] + (1) 4-Hydroxy-L-glutamate[c] --> (1) L-Glutamate[c] + (1) 4-Hydroxy-2-oxoglutarate[c]	(1) cpd00024[c] + (1) cpd01974[c] --> (1) cpd00023[c] + (1) cpd00830[c]	0,10000	Arginine and proline metabolism
rxn00395	L-Arginine iminohydrolase	3.5.3.6	sll1336	(1) H2O[c] + (1) L-Arginine[c] --> (1) NH3[c] + (1) Citrulline[c]	(1) cpd00001[c] + (1) cpd00051[c] --> (1) cpd00013[c] + (1) cpd00274[c]	0,10000	Arginine and proline metabolism
rxn00183	L-Glutamate 5-semialdehyde:NAD+ oxidoreductase	1.5.1.12	sll1561	(1) H2O[c] + (1) NAD[c] + (1) L-Glutamate5-semialdehyde[c] --> (1) NADH[c] + (1) L-Glutamate[c] + (2) H+[c]	(1) cpd00001[c] + (1) cpd00003[c] + (1) cpd00858[c] --> (1) cpd00004[c] + (1) cpd00023[c] + (2) cpd00067[c]	0,10000	Arginine and proline metabolism
rxn03071	L-1-Pyrroline-3-hydroxy-5-carboxylate:NAD+ oxidoreductase	1.5.1.12	sll1561	(2) H2O[c] + (1) NAD[c] + (1) 3-Hydroxy-L-1-pyrroline-5-carboxylate[c] --> (1) NADH[c] + (1) H+[c] + (1) 4-Hydroxy-L-glutamate[c]	(2) cpd00001[c] + (1) cpd00003[c] + (1) cpd02625[c] --> (1) cpd00004[c] + (1) cpd00067[c] + (1) cpd01974[c]	0,10000	Arginine and proline metabolism
rxn03424	L-erythro-4-Hydroxyglutamate:NAD+ oxidoreductase	1.5.1.12 or 1.5.99.8	sll1561	(1) H2O[c] + (1) NAD[c] + (1) L-4-Hydroxyglutamatesemialdehyde[c] --> (1) NADH[c] + (2) H+[c] + (1) 4-Hydroxy-L-glutamate[c]	(1) cpd00001[c] + (1) cpd00003[c] + (1) cpd03530[c] --> (1) cpd00004[c] + (2) cpd00067[c] + (1) cpd01974[c]	0,10000	Arginine and proline metabolism
rxn09188	Proline dehydrogenase	1.5.99.8	sll1561	(1) FAD[c] + (1) L-Proline[c] --> (1) FADH2[c] + (1) 1-Pyrroline-5-carboxylate[c]	(1) cpd00015[c] + (1) cpd00129[c] --> (1) cpd00982[c] + (1) cpd02431[c]	0,10000	Arginine and proline metabolism
rxn09487	D1-pyrroline-5-carboxylate dehydrogenase, mitochondrial	1.5.1.12	sll1561	(1) H2O[c] + (1) NADP[c] + (1) L-Glutamate5-semialdehyde[c] --> (1) NADPH[c] + (1) L-Glutamate[c] + (2) H+[c]	(1) cpd00001[c] + (1) cpd00006[c] + (1) cpd00858[c] --> (1) cpd00005[c] + (1) cpd00023[c] + (2) cpd00067[c]	0,10000	Arginine and Proline Metabolism
rxn00929	L-Proline:NAD+ 5-oxidoreductase	1.5.1.2	slr0661	(1) NADH[c] + (1) H+[c] + (1) 1-Pyrroline-5-carboxylate[c] --> (1) NAD[c] + (1) L-Proline[c]	(1) cpd00004[c] + (1) cpd00067[c] + (1) cpd02431[c] --> (1) cpd00003[c] + (1) cpd00129[c]	0,10000	Arginine and proline metabolism
rxn02356	trans-4-Hydroxy-L-proline:NAD+ 5-oxidoreductase	1.5.1.2	slr0661	(1) NAD[c] + (1) trans-4-Hydroxy-L-proline[c] --> (1) NADH[c] + (1) H+[c] + (1) 3-Hydroxy-L-1-pyrroline-5-carboxylate[c]	(1) cpd00003[c] + (1) cpd00851[c] --> (1) cpd00004[c] + (1) cpd00067[c] + (1) cpd02625[c]	0,10000	Arginine and proline metabolism
rxn02358	trans-4-Hydroxy-L-proline:NADP+ 5-oxidoreductase	1.5.1.2	slr0661	(1) NADP[c] + (1) trans-4-Hydroxy-L-proline[c] --> (1) NADPH[c] + (1) H+[c] + (1) 3-Hydroxy-L-1-pyrroline-5-carboxylate[c]	(1) cpd00006[c] + (1) cpd00851[c] --> (1) cpd00005[c] + (1) cpd00067[c] + (1) cpd02625[c]	0,10000	Arginine and proline metabolism
rxn00467	L-Ornithine:2-oxo-acid aminotransferase	2.6.1.13		(1) 2-Oxoglutarate[c] + (1) Ornithine[c] --> (1) L-Glutamate[c] + (1) L-Glutamate5-semialdehyde[c]	(1) cpd00024[c] + (1) cpd00064[c] --> (1) cpd00023[c] + (1) cpd00858[c]	0,10000	Arginine and proline metabolism
rxn00504	L-1-Pyrroline-5-carboxylate:NAD+ oxidoreductase	1.5.1.12	sll1561	(2) H2O[c] + (1) NADP[c] + (1) 1-Pyrroline-5-carboxylate[c] <=> (1) NADPH[c] + (1) L-Glutamate[c] + (1) H+[c]	(2) cpd00001[c] + (1) cpd00006[c] + (1) cpd02431[c] <=> (1) cpd00005[c] + (1) cpd00023[c] + (1) cpd00067[c]	-10000,10000	Arginine and Proline Metabolism
rxn03072	L-1-Pyrroline-3-hydroxy-5-carboxylate:NADP+ oxidoreductase	1.5.1.12	sll1561	(2) H2O[c] + (1) NADP[c] + (1) 3-Hydroxy-L-1-pyrroline-5-carboxylate[c] <=> (1) NADPH[c] + (1) H+[c] + (1) 4-Hydroxy-L-glutamate[c]	(2) cpd00001[c] + (1) cpd00006[c] + (1) cpd02625[c] <=> (1) cpd00005[c] + (1) cpd00067[c] + (1) cpd01974[c]	-10000,10000	Arginine and Proline Metabolism
rxn04840	Glutathione: 5-HPETE oxidoreductase	1.11.1.9	slr1992 or slr1171	(2) Glutathione[c] + (1) 5(S)-HPETE[c] --> (1) H2O[c] + (1) Oxidized glutathione[c] + (1) 5-HETE[c]	(2) cpd00042[c] + (1) cpd03176[c] --> (1) cpd00001[c] + (1) cpd00111[c] + (1) cpd02918[c]	0,10000	Arachidonic acid metabolism
rxn04841	Glutathione: 15-HPETE oxidoreductase	1.11.1.9	slr1992 or slr1171	(2) Glutathione[c] + (1) 15(S)-HPETE[c] --> (1) H2O[c] + (1) Oxidized glutathione[c] + (1) 15(S)-HETE[c]	(2) cpd00042[c] + (1) cpd03555[c] --> (1) cpd00001[c] + (1) cpd00111[c] + (1) cpd02890[c]	0,10000	Arachidonic acid metabolism
rxn00293	UTP:N-acetyl-alpha-D-glucosamine-1-phosphate uridylyltransferase	2.7.7.23	sll0899	(1) UTP[c] + (1) N-Acetyl-D-glucosamine1-phosphate[c] --> (1) PPi[c] + (1) UDP-N-acetylglucosamine[c]	(1) cpd00062[c] + (1) cpd02611[c] --> (1) cpd00012[c] + (1) cpd00037[c]	0,10000	Aminosugars metabolism
rxn03638	Acetyl-CoA:D-glucosamine-1-phosphate N-acetyltransferase	2.3.1.157	sll0899	(1) Acetyl-CoA[c] + (1) D-Glucosamine1-phosphate[c] --> (1) CoA[c] + (1) H+[c] + (1) N-Acetyl-D-glucosamine1-phosphate[c]	(1) cpd00022[c] + (1) cpd03671[c] --> (1) cpd00010[c] + (1) cpd00067[c] + (1) cpd02611[c]	0,10000	Aminosugars metabolism
rxn00461	Phosphoenolpyruvate:UDP-N-acetyl-D-glucosamine	2.5.1.7	slr0017	(1) UDP-N-acetylglucosamine[c] + (1) Phosphoenolpyruvate[c] --> (1) Phosphate[c] + (1) H+[c] + (1) UDP-N-acetylglucosamine enolpyruvate[c]	(1) cpd00037[c] + (1) cpd00061[c] --> (1) cpd00009[c] + (1) cpd00067[c] + (1) cpd02820[c]	0,10000	Aminosugars metabolism
rxn02285	UDP-N-acetylmuramate:NADP+ oxidoreductase	1.1.1.158	slr1424	(1) NADPH[c] + (1) H+[c] + (1) UDP-N-acetylglucosamine enolpyruvate[c] --> (1) NADP[c] + (1) UDP-N-acetylmuramate[c]	(1) cpd00005[c] + (1) cpd00067[c] + (1) cpd02820[c] --> (1) cpd00006[c] + (1) cpd00773[c]	0,10000	Aminosugars metabolism
rxn01485	D-Glucosamine 1-phosphate 1,6-phosphomutase	5.4.2.10	(sll0726 or sll1758)	(1) D-Glucosamine1-phosphate[c] <=> (1) D-Glucosamine phosphate[c]	(1) cpd03671[c] <=> (1) cpd00288[c]	-10000,10000	Aminosugars metabolism
rxn09486	UDP-N-acetylglucosamine diphosphorylase	2.7.7.23	sll0899	(1) UTP[c] + (1) N-Acetyl-D-glucosamine1-phosphate[c] <=> (1) PPi[c] + (1) UDP-N-acetyl-D-galactosamine[c]	(1) cpd00062[c] + (1) cpd02611[c] <=> (1) cpd00012[c] + (1) cpd00175[c]	-10000,10000	Aminosugars metabolism
rxn00292	UDP-N-acetyl-D-glucosamine 2-epimerase	5.1.3.14	slr0624	(1) H2O[c] + (1) UDP-N-acetylglucosamine[c] <=> (1) UDP[c] + (1) N-Acetyl-D-mannosamine[c]	(1) cpd00001[c] + (1) cpd00037[c] <=> (1) cpd00014[c] + (1) cpd00492[c]	-10000,10000	Aminosugars metabolism
rxn00297	UDP-N-acetyl-D-glucosamine 2-epimerase	5.1.3.14	slr0624	(1) UDP-N-acetylglucosamine[c] <=> (1) UDP-N-acetyl-D-mannosamine[c]	(1) cpd00037[c] <=> (1) cpd00861[c]	-10000,10000	Aminosugars metabolism
rxn02284	UDP-N-acetylmuramate:NADP+ oxidoreductase	1.1.1.158	slr1424	(1) NAD[c] + (1) UDP-N-acetylmuramate[c] <=> (1) NADH[c] + (1) H+[c] + (1) UDP-N-acetylglucosamine enolpyruvate[c]	(1) cpd00003[c] + (1) cpd00773[c] <=> (1) cpd00004[c] + (1) cpd00067[c] + (1) cpd02820[c]	-10000,10000	Aminosugars metabolism
rxn06441	L-Leucine:tRNA(Leu) ligase (AMP-forming)	6.1.1.4	sll1074	(1) ATP[c] + (1) H+[c] + (1) L-Leucine[c] + (1) tRNA(Leu)[c] --> (1) PPi[c] + (1) AMP[c] + (1) L-Leucyl-tRNA[c]	(1) cpd00002[c] + (1) cpd00067[c] + (1) cpd00107[c] + (1) cpd11916[c] --> (1) cpd00012[c] + (1) cpd00018[c] + (1) cpd12003[c]	0,10000	Aminoacyl-tRNA biosynthesis, Valine,leucine and isoleucine biosynthesis
rxn06440	L-Isoleucine:tRNA(Ile) ligase (AMP-forming)	6.1.1.5	sll1362	(1) ATP[c] + (1) H+[c] + (1) L-Isoleucine[c] + (1) tRNA(Ile)[c] --> (1) PPi[c] + (1) AMP[c] + (1) L-Isoleucyl-tRNA(Ile)[c]	(1) cpd00002[c] + (1) cpd00067[c] + (1) cpd00322[c] + (1) cpd11915[c] --> (1) cpd00012[c] + (1) cpd00018[c] + (1) cpd12256[c]	0,10000	Aminoacyl-tRNA biosynthesis, Valine,leucine and isoleucine biosynthesis
rxn06449	L-Valine:tRNAVal ligase (AMP-forming)	6.1.1.9	slr0557	(1) ATP[c] + (1) H+[c] + (1) L-Valine[c] + (1) tRNA(Val)[c] --> (1) PPi[c] + (1) AMP[c] + (1) L-Valyl-tRNA(Val)[c]	(1) cpd00002[c] + (1) cpd00067[c] + (1) cpd00156[c] + (1) cpd11924[c] --> (1) cpd00012[c] + (1) cpd00018[c] + (1) cpd12133[c]	0,10000	Aminoacyl-tRNA biosynthesis, Valine,leucine and isoleucine biosynthesis
rxn06444	L-Phenylalanine:tRNA(Ala) ligase (AMP-forming)	6.1.1.20	(sll0454 and sll1553)	(1) ATP[c] + (1) L-Phenylalanine[c] + (1) H+[c] + (1) tRNA(Phe)[c] --> (1) PPi[c] + (1) AMP[c] + (1) L-Phenylalanyl-tRNA(Phe)[c]	(1) cpd00002[c] + (1) cpd00066[c] + (1) cpd00067[c] + (1) cpd11919[c] --> (1) cpd00012[c] + (1) cpd00018[c] + (1) cpd12335[c]	0,10000	Aminoacyl-tRNA biosynthesis, Phenylalanine,tyrosine and tryptophan biosynthesis
rxn06280	L-Tyrosine:tRNA(Tyr) ligase (AMP-forming)	6.1.1.1	(slr1031) or (ssr1720)	(1) ATP[c] + (1) H+[c] + (1) L-Tyrosine[c] + (1) tRNA(Tyr)[c] --> (1) PPi[c] + (1) AMP[c] + (1) L-Tyrosyl-tRNA(Tyr)[c]	(1) cpd00002[c] + (1) cpd00067[c] + (1) cpd00069[c] + (1) cpd11751[c] --> (1) cpd00012[c] + (1) cpd00018[c] + (1) cpd12194[c]	0,10000	Aminoacyl-tRNA biosynthesis, Phenylalanine,tyrosine and tryptophan biosynthesis
rxn08857	Lysyl-tRNA synthetase	6.1.1.6	slr1550	(1) ATP[c] + (1) L-Lysine[c] + (1) H+[c] + (1) tRNA(Lys)[c] --> (1) PPi[c] + (1) AMP[c] + (1) L-Lysine-tRNA (Lys)[c]	(1) cpd00002[c] + (1) cpd00039[c] + (1) cpd00067[c] + (1) cpd11917[c] --> (1) cpd00012[c] + (1) cpd00018[c] + (1) cpd15249[c]	0,10000	Aminoacyl-tRNA biosynthesis, Lysine biosynthesis
rxn06439	L-Histidine:tRNA(His) ligase (AMP-forming)	6.1.1.21	slr0357	(1) ATP[c] + (1) H+[c] + (1) L-Histidine[c] + (1) tRNA(His)[c] --> (1) PPi[c] + (1) AMP[c] + (1) L-Histidyl-tRNA(His)[c]	(1) cpd00002[c] + (1) cpd00067[c] + (1) cpd00119[c] + (1) cpd11914[c] --> (1) cpd00012[c] + (1) cpd00018[c] + (1) cpd12228[c]	0,10000	Aminoacyl-tRNA biosynthesis, Histidine metabolism
rxn06438	Glycine:tRNA(Gly) ligase (AMP-forming)	6.1.1.14	(slr0638 and slr0220)	(1) ATP[c] + (1) Glycine[c] + (1) H+[c] + (1) tRNA(Gly)[c] --> (1) PPi[c] + (1) AMP[c] + (1) Glycyl-tRNA(Gly)[c]	(1) cpd00002[c] + (1) cpd00033[c] + (1) cpd00067[c] + (1) cpd11913[c] --> (1) cpd00012[c] + (1) cpd00018[c] + (1) cpd12100[c]	0,10000	Aminoacyl-tRNA biosynthesis, Glycine,serine and threonine metabolism
rxn06447	L-Threonine:tRNA(Thr) ligase (AMP-forming)	6.1.1.3	sll0078	(1) ATP[c] + (1) L-Threonine[c] + (1) tRNA(Thr)[c] --> (1) PPi[c] + (1) AMP[c] + (1) L-Threonyl-tRNA(Thr)[c]	(1) cpd00002[c] + (1) cpd00161[c] + (1) cpd11922[c] --> (1) cpd00012[c] + (1) cpd00018[c] + (1) cpd12229[c]	0,10000	Aminoacyl-tRNA biosynthesis, Glycine,serine and threonine metabolism
rxn06446	L-Serine:tRNA(Ser) ligase (AMP-forming)	6.1.1.11	slr1703	(1) ATP[c] + (1) L-Serine[c] + (1) tRNA(Ser)[c] --> (1) PPi[c] + (1) AMP[c] + (1) L-Seryl-tRNA(Ser)[c]	(1) cpd00002[c] + (1) cpd00054[c] + (1) cpd11921[c] --> (1) cpd00012[c] + (1) cpd00018[c] + (1) cpd12132[c]	0,10000	Aminoacyl-tRNA biosynthesis, Glycine,serine and threonine metabolism
rxn06300	L-Alanine:tRNA(Ala) ligase (AMP-forming)	6.1.1.7	sll0362	(1) ATP[c] + (1) L-Alanine[c] + (1) H+[c] + (1) tRNA(Ala)[c] --> (1) PPi[c] + (1) AMP[c] + (1) L-Alanyl-tRNA[c]	(1) cpd00002[c] + (1) cpd00035[c] + (1) cpd00067[c] + (1) cpd11906[c] --> (1) cpd00012[c] + (1) cpd00018[c] + (1) cpd11770[c]	0,10000	Aminoacyl-tRNA biosynthesis, Alanine and aspartate metabolism
rxn06434	L-Asparagine:tRNA(Asn) ligase (AMP-forming)	6.1.1.22	sll0495	(1) ATP[c] + (1) H+[c] + (1) L-Asparagine[c] + (1) tRNA(Asn)[c] --> (1) PPi[c] + (1) AMP[c] + (1) L-Asparaginyl-tRNA(Asn)[c]	(1) cpd00002[c] + (1) cpd00067[c] + (1) cpd00132[c] + (1) cpd11908[c] --> (1) cpd00012[c] + (1) cpd00018[c] + (1) cpd12313[c]	0,10000	Aminoacyl-tRNA biosynthesis, Alanine and aspartate metabolism
rxn06936	L-Aspartate:tRNA(Asp) ligase (AMP-forming)	6.1.1.12	slr1720	(1) ATP[c] + (1) L-Aspartate[c] + (1) H+[c] + (1) tRNA(Asp)[c] --> (1) PPi[c] + (1) AMP[c] + (1) L-Aspartyl-tRNA(Asp)[c]	(1) cpd00002[c] + (1) cpd00041[c] + (1) cpd00067[c] + (1) cpd11909[c] --> (1) cpd00012[c] + (1) cpd00018[c] + (1) cpd12226[c]	0,10000	Aminoacyl-tRNA biosynthesis, Alanine and aspartate metabolism
rxn11951	S-Adenosyl-L-methionine:tRNA (uracil-5-)-methyltransferase	2.1.1.35	slr0457	(1) S-Adenosyl-L-methionine[c] + (1) tRNA UpsiC[c] --> (1) S-Adenosyl-homocysteine[c] + (1) H+[c] + (1) tRNA TpsiC[c]	(1) cpd00017[c] + (1) cpd11948[c] --> (1) cpd00019[c] + (1) cpd00067[c] + (1) cpd11947[c]	0,10000	Aminoacyl-tRNA biosynthesis
rxn06459	5,10-Methylenetetrahydrofolate:tRNA-UpsiC	2.1.1.74	sll0204	(1) 5-10-Methylenetetrahydrofolate[c] + (1) FADH2[c] + (1) tRNA UpsiC[c] <=> (1) FAD[c] + (1) Tetrahydrofolate[c] + (1) tRNA TpsiC[c]	(1) cpd00125[c] + (1) cpd00982[c] + (1) cpd11948[c] <=> (1) cpd00015[c] + (1) cpd00087[c] + (1) cpd11947[c]	-10000,10000	Aminoacyl-tRNA biosynthesis
rxn00527	L-Tyrosine:2-oxoglutarate aminotransferase	2.6.1.5	(sll0402 or sll0480 or slr0036 or sll1713 or sll1958)	(1) 2-Oxoglutarate[c] + (1) L-Tyrosine[c] <=> (1) L-Glutamate[c] + (1) p-hydroxyphenylpyruvate[c]	(1) cpd00024[c] + (1) cpd00069[c] <=> (1) cpd00023[c] + (1) cpd00868[c]	-10000,10000	Alkaloid biosynthesis I, Novobiocin biosynthesis, Tyrosine metabolism, Phenylalanine,tyrosine and tryptophan biosynthesis
rxn00262	L-Aspartic acid:oxygen oxidoreductase (deaminating)	1.4.3.16	sll0631	(1) H2O[c] + (1) O2[c] + (1) L-Aspartate[c] --> (1) NH3[c] + (1) H2O2[c] + (1) Oxaloacetate[c]	(1) cpd00001[c] + (1) cpd00007[c] + (1) cpd00041[c] --> (1) cpd00013[c] + (1) cpd00025[c] + (1) cpd00032[c]	0,10000	Alanine and aspartate metabolism
rxn00340	L-Aspartate:ammonia ligase (AMP-forming)	6.3.1.1		(1) ATP[c] + (1) NH3[c] + (1) L-Aspartate[c] --> (1) PPi[c] + (1) AMP[c] + (1) L-Asparagine[c]	(1) cpd00002[c] + (1) cpd00013[c] + (1) cpd00041[c] --> (1) cpd00012[c] + (1) cpd00018[c] + (1) cpd00132[c]	0,10000	Alanine and aspartate metabolism
rxn06619	Asp-tRNA(Asn):L-glutamine amido-ligase (ADP-forming)	6.3.5.6	sll1435 and slr0033 and slr0877	(1) ADP[c] + (1) Phosphate[c] + (1) L-Glutamate[c] + (1) L-Asparaginyl-tRNA(Asn)[c] <=> (1) ATP[c] + (1) L-Glutamine[c] + (1) Asp-tRNA(Asn)[c]	(1) cpd00008[c] + (1) cpd00009[c] + (1) cpd00023[c] + (1) cpd12313[c] <=> (1) cpd00002[c] + (1) cpd00053[c] + (1) cpd12829[c]	-10000,10000	Alanine and aspartate metabolism
rxn06433	L-Aspartate:tRNAAsp ligase (AMP-forming)	6.1.1.23	slr1720	(1) ATP[c] + (1) L-Aspartate[c] + (1) tRNA(Asn)[c] + (2) H+[c] <=> (1) PPi[c] + (1) AMP[c] + (1) Asp-tRNA(Asn)[c]	(1) cpd00002[c] + (1) cpd00041[c] + (1) cpd11908[c] + (2) cpd00067[c] <=> (1) cpd00012[c] + (1) cpd00018[c] + (1) cpd12829[c]	-10000,10000	Alanine and aspartate metabolism
rxn04161_deg	chlorophyllase	3.1.1.14		(1) Chlorophyll a[c] + (1) H2O[c] --> (1) Phytol[c] + (1) Chlorophyllide[c]	(1) cpd03148[c] + (1) cpd00001[c] --> (1) cpd00999[c] + (1) cpd01449[c]	0,10000	Porphyrin and chlorophyll metabolism
Ec_biomass_SynAuto	Autotrophic Biomas			(53.4862) ATP[c] + (4.4667e-005) NADH[c] + (0.0017867) NAD[c] + (48.7499) H2O[c] + (0.000335) NADPH[c] + (0.00011167) NADP[c] + (0.13259) GTP[c] + (0.000279) Acetyl-CoA[c] + (3.1267e-005) Malonyl-CoA[c] + (0.147770023) L-Glutamate[c] + (0.0001675) CoA[c] + (0.00022333) Riboflavin[c] + (0.135574722) L-Glutamine[c] + (0.000223) Calomide[c] + (0.135448041) L-Aspartate[c] + (0.03327) Putrescine[c] + …	(53.4862) cpd00002[c] + (4.4667e-005) cpd00004[c] + (0.0017867) cpd00003[c] + (48.7499) cpd00001[c] + (0.000335) cpd00005[c] + (0.00011167) cpd00006[c] + (0.13259) cpd00038[c] + (0.000279) cpd00022[c] + (3.1267e-005) cpd00070[c] + (0.147770023) cpd00023[c] + (0.0001675) cpd00010[c] + (0.00022333) cpd00220[c] + (0.135574722) cpd00053[c] + (0.000223) cpd00166[c] + (0.135448041) cpd00041[c] + (0.033…	0,10000
rxn00644_mod	rxn00644_mod			(1) NADH[c] + (1) L-Cystine[c] + (1) H+[c] --> (1) NAD[c] + (2) L-Cysteine[c]	(1) cpd00004[c] + (1) cpd00381[c] + (1) cpd00067[c] --> (1) cpd00003[c] + (2) cpd00084[c]	0,10000
rxn03542_mod	hydrogenobyrinic-acid-a,c-diamide:cobalt cobalt-ligase (ADP-forming)			(1) ATP[c] + (1) Co2+[c] + (1) Hydrogenobyrinate diamide[c] + (1) H2O[c] --> (1) ADP[c] + (1) Phosphate[c] + (2) H+[c] + (1) Cob(II)yrinate diamide[c]	(1) cpd00002[c] + (1) cpd00149[c] + (1) cpd03913[c] + (1) cpd00001[c] --> (1) cpd00008[c] + (1) cpd00009[c] + (2) cpd00067[c] + (1) cpd03914[c]	0,10000
rxn03648_mod	rxn03648			(1) beta-Carotene[c] + (1) NADPH[c] + (1) O2[c] --> (1) Echinenone[c] + (1) NADP[c] + (1) H2O[c] + (1) H+[c]	(1) cpd01420[c] + (1) cpd00005[c] + (1) cpd00007[c] --> (1) cpd05499[c] + (1) cpd00006[c] + (1) cpd00001[c] + (1) cpd00067[c]	0,10000
rxn03843	Farnesyl diphosphate:Isopentenyl diphosphate farnesyl transferase			(1) Farnesyldiphosphate[c] + (1) Isopentenyldiphosphate[c] --> (1) PPi[c] + (1) trans,trans,cis-Geranylgeranyl diphosphate[c]	(1) cpd00350[c] + (1) cpd00113[c] --> (1) cpd00012[c] + (1) cpd08211[c]	0,10000
rxn04996	rxn04996			(1) 1-Hydroxy-2-methyl-2-butenyl 4-diphosphate[c] + (1) H+[c] + (1) NADPH[c] --> (1) DMAPP[c] + (1) NADP[c] + (1) H2O[c]	(1) cpd08615[c] + (1) cpd00067[c] + (1) cpd00005[c] --> (1) cpd00202[c] + (1) cpd00006[c] + (1) cpd00001[c]	0,10000
xylcycle	xylcycle			(1) D-Xylulose5-phosphate[c] + (1) H+[c] + (1) NADPH[c] --> (1) Xylitol 5-phosphate[c] + (1) NADP[c]	(1) cpd00198[c] + (1) cpd00067[c] + (1) cpd00005[c] --> (1) cpd01855[c] + (1) cpd00006[c]	0,10000
hyprxn	hyprxn			(1) Xylitol 5-phosphate[c] + (1) CTP[c] + (2) H+[c] --> (1) 4--cytidine5-diphospho-2-C-methyl-D-erythritol[c] + (1) PPi[c] + (1) H2O[c]	(1) cpd01855[c] + (1) cpd00052[c] + (2) cpd00067[c] --> (1) cpd08287[c] + (1) cpd00012[c] + (1) cpd00001[c]	0,10000
rxn00203	rxn00203			(1) 2-Oxoglutarate[c] + (1) H+[c] --> (1) CO2[c] + (1) 4-Oxobutanoate[c]	(1) cpd00024[c] + (1) cpd00067[c] --> (1) cpd00011[c] + (1) cpd00199[c]	0,10000
rxnAAred	rxnAAred			(1) Stearoyl-[acyl-carrier protein][c] + (1) H+[c] + (1) NADH[c] --> (1) NAD[c] + (1) ACP[c] + (1) Octadecanal[c]	(1) cpd12458[c] + (1) cpd00067[c] + (1) cpd00004[c] --> (1) cpd00003[c] + (1) cpd11493[c] + (1) cpd01264[c]	0,10000
rxnALDcc	rxnALDcc			(1) Octadecanal[c] + (1) O2[c] + (2) NADPH[c] + (1) H+[c] --> (1) Formate[c] + (1) H2O[c] + (2) NADP[c] + (1) Heptadecane[c]	(1) cpd01264[c] + (1) cpd00007[c] + (2) cpd00005[c] + (1) cpd00067[c] --> (1) cpd00047[c] + (1) cpd00001[c] + (2) cpd00006[c] + (1) cpd01250[c]	0,10000
heptr	hep transport			(1) Heptadecane[c] --> (1) Heptadecane[e]	(1) cpd01250[c] --> (1) cpd01250[e]	0,10000
Ex_hep	hep exchange			(1) Heptadecane[e] -->	(1) cpd01250[e] -->	0,10000
phbtr	phb transport			(1) (R)-3-Hydroxybutanoyl-CoA[c] --> (1) (R)-3-Hydroxybutanoyl-CoA[e]	(1) cpd02234[c] --> (1) cpd02234[e]	0,10000
EX_phb	phb exchange			(1) (R)-3-Hydroxybutanoyl-CoA[e] -->	(1) cpd02234[e] -->	0,10000
EX_dialurate				(1)dialurate[c] -->	(1) dialurate[c] -->	0,10000
EX_niacin				(1)Niacin[c] -->	(1) cpd00218[c] -->	0,10000
rxn03974		1.5.1.39		(1)NADH[c] + (1)FMN[c] + (1)H+[c] <=> (1) NAD[c] + (1)FMNH2[c]	(1) cpd00004[c] + (1) cpd00050[c] + (1) cpd00067[c] <=> (1) cpd00003[c] + (1) cpd01270[c]	-10000,10000
dmb_syn		1.13.11.79		(1)FMNH2[c] + (1)O2[c] <=> (1)dialurate[c] + (1)d-erythrose 4-phosphate[c] + (1)Dimethylbenzimidazole[c]	(1) cpd01270[c] + (1) cpd00007[c] <=> (1) dialurate[c] + (1) cpd00236[c] + (1) cpd01997[c]	-10000,10000
rxn02897		2.4.2.21		(1)Nicotinate ribonucleotide[c] + (1)Dimethylbenzimidazole[c] <=> (1)H+[c] + (1)Niacin[c] + (1)alpha-Ribazole 5'-phosphate[c]	(1) cpd00873[c] + (1) cpd01997[c] <=> (1) cpd00067[c] + (1) cpd00218[c] + (1) cpd02904[c]	-10000,10000
rxn03150		3.1.3.73		(1)H2O[c] + (1)alpha-Ribazole 5'-phosphate[c]?<=>?(1)Phosphate[c] + (1)H+[c] + (1)alpha-Ribazole[c]	(1) cpd00001[c] + (1) cpd02904[c] <=> (1) cpd00009[c] + (1) cpd00067[c] + (1) cpd03423[c]	-10000,10000
rxn30003	cytidine deaminase	3.5.4.5	sll5107	(1) H2O[c] + (1) Cytidine[c] <=> (1) Uridine[c] + (1) NH3[c]	(1) cpd00001[c] + (1) cpd00367[c] <=> (1) cpd00249[c] + (1) cpd00013[c]	-10000,10000		[4]
rxn30007	deoxycytidine deaminase	3.5.4.5	sll5107	(1) H2O[c] + (1) Deoxycytidine[c] <=> (1) Deoxyuridine[c] + (1) NH3[c]	(1) cpd00001[c] + (1) cpd00654[c] <=> (1) cpd00412[c] + (1) cpd00013[c]	-10000,10000		[4]
UDPglcdehyd	UDP-glucose dehydrogenase	1.1.1.22	slr1299	(1) UDP-glucose[c] + (1) H2O[c] + (2) NAD[c] <=> (1) UDPglucuronate[c] + (2) NADH[c] + (2) proton[c]	(1) cpd00026[c] + (1) cpd00001[c] + (2) cpd00003[c] <=> (1) cpd00144[c] + (2) cpd00004[c] + (2) cpd00067[c]	-10000,10000		[5]
References
[1] Chen X, Schreiber K, Appel J, Makowka A, Fähnrich B, Roettger M, et al. The Entner-Doudoroff pathway is an overlooked glycolytic route in cyanobacteria and plants. Proc Natl Acad Sci U S A 2016;113:5441–6. doi:10.1073/pnas.1521916113.
[2] Xiong W, Lee T-C, Rommelfanger S, Gjersing E, Cano M, Maness P-C, et al. Phosphoketolase pathway contributes to carbon metabolism in cyanobacteria. Nat Plants 2015;2:15187. doi:10.1038/nplants.2015.187.
[3] Volkmer T, Knoop H, Beyer G, Baier A, Lockau W, Steuer R, et al. Identification of the light-independent phosphoserine pathway as an additional source of serine in the cyanobacterium Synechocystis sp. PCC 6803. Microbiology 2015;161:1050–60. doi:10.1099/mic.0.000055.
[4] Gene [Internet]. Bethesda (MD): National Library of Medicine (US), National Center for Biotechnology Information; [1988] – . Accession No. NC_005229.1, Synechocystis sp. PCC 6803 cytidine deaminase (sll5107); [cited 2016 10 7] n.d. https://www.ncbi.nlm.nih.gov/gene/2655946.
[5] Gene [Internet]. Bethesda (MD): National Library of Medicine (US), National Center for Biotechnology Information; [1988] – . Accession No. NC_005229.1, Synechocystis sp. PCC 6803 UDP-glucose dehydrogenase (slr1299); [cited 2016 10 7] n.d. https://www.ncbi.nlm.nih.gov/gene/953468.

## Sheet: BaseModel_METABOLITES
Metabolite ID	Metabolite Name	Formula(charged)	Charge
cpd00727[ca]	2-Phosphoglycolate	C2H3O6P	-2
cpd00727[c]	2-Phosphoglycolate	C2H3O6P	-2
cpd00169[ca]	3-Phosphoglycerate	C3H5O7P	-2
cpd00169[c]	3-Phosphoglycerate	C3H5O7P	-2
cpd14881[c]	Linoleoyl-ACP	C18H31ORS	0
cpdLiG3P[c]	1-octadec-9-12-dienoyl-sn-glycerol 3-phosphate	C21H37O7P1	-2
cpd11493[c]	ACP	C11H21N2O7PRS	-1
c_DLiG3P[c]	1,2-dioctadec-9-12-dienoyl-sn-glycerol 3-phosphate	C39H67O8P1	-2
cpd14882[c]	alpha-Linolenoyl-ACP	C18H29ORS	0
cp_aLG3P[c]	1-octadec-9-12-15-trienoyl-sn-glycerol 3-phosphate	C21H35O7P1	-2
c_DaLG3P[c]	1,2-dioctadec-9-12-15-trienoyl-sn-glycerol 3-phosphate	C39H63O8P1	-2
1odec9eg3p[c]	1-octadec-9-enoyl-sn-glycerol 3-phosphate	C21H39O7P1	-2
cpd11825[c]	Octadecenoyl-ACP	C29H53N2O8PRS	-1
pa181:9[c]	1,2-dioctadec-9-enoyl-sn-glycerol 3-phosphate	C39H71O8P1	-2
1odec6912eg3p[c]	1-octadec-6-9-12trienoyl-sn-glycerol 3-phosphate	C21H35O7P1	-2
octe6912ACP[c]	gamma-linolenoilACP	C29H49N2O8PRS	-1
pa183:6:9:12[c]	1,2-dioctadec-6-9-12-trienoyl-sn-glycerol 3-phosphate	C39H63O8P1	-2
1odec691215eg3p[c]	1-octadec-6-9-12-15-tetraenoyl-sn-glycerol 3-phosphate	C21H33O7P1	-2
octe691215ACP[c]	OctadecatetraenoilACP	C29H47N2O8PRS	-1
pa184:6:9:12:15[c]	1,2-dioctadec-6-9-12-15-tetraenoyl-sn-glycerol 3-phosphate	C39H59O8P1	-2
cpd00067[p]	H+	H	1
cpd00024[p]	2-Oxoglutarate	C5H4O5	-2
cpd00067[c]	H+	H	1
cpd00024[c]	2-Oxoglutarate	C5H4O5	-2
cpd00067[l]	H+	H	1
cpd00008[c]	ADP	C10H13N5O10P2	-2
cpd00009[c]	Phosphate	HO4P	-2
cpd00002[c]	ATP	C10H13N5O13P3	-3
cpd00001[c]	H2O	H2O	0
cpd00007[c]	O2	O2	0
cpd00005[c]	NADPH	C21H27N7O17P3	-3
cpd01420[c]	beta-Carotene	C40H56	0
cpd00006[c]	NADP	C21H26N7O17P3	-2
cpd05498[c]	beta-Cryptoxanthin	C40H56O	0
cpd03637[c]	Zeaxanthin	C40H56O2	0
cpd00242[p]	Bicarbonate	CHO3	-1
cpd00242[c]	Bicarbonate	CHO3	-1
cpd00004[c]	NADH	C21H27N7O14P2	-2
cpd00003[c]	NAD	C21H26N7O14P2	-1
cpd00038[c]	GTP	C10H13N5O14P3	-3
cpd00022[c]	Acetyl-CoA	C23H35N7O17P3S	-3
cpd00070[c]	Malonyl-CoA	C24H34N7O19P3S	-4
cpd00023[c]	L-Glutamate	C5H8NO4	-1
cpd00010[c]	CoA	C21H33N7O16P3S	-3
cpd00220[c]	Riboflavin	C17H20N4O6	0
cpd00053[c]	L-Glutamine	C5H10N2O3	0
cpd00166[c]	Calomide	C72H101CoN18O17P	1
cpd00041[c]	L-Aspartate	C4H6NO4	-1
cpd00118[c]	Putrescine	C4H14N2	2
cpd00201[c]	10-Formyltetrahydrofolate	C20H21N7O7	-2
cpd00087[c]	Tetrahydrofolate	C19H21N7O6	-2
cpd00013[c]	NH3	H4N	1
cpd00035[c]	L-Alanine	C3H7NO2	0
cpd00216[c]	Chorismate	C10H8O6	-2
cpd00051[c]	L-Arginine	C6H15N4O2	1
cpd00132[c]	L-Asparagine	C4H8N2O3	0
cpd05499[c]	Echinenone	C40H54O	0
cpd00017[c]	S-Adenosyl-L-methionine	C15H23N6O5S	1
cpd00060[c]	L-Methionine	C5H11NO2S	0
cpd00205[c]	K+	K	1
cpd00034[c]	Zn2+	Zn	2
cpd00063[c]	Ca2+	Ca	2
cpd00058[c]	Cu2+	Cu	2
cpd00971[c]	Na+	Na	1
cpd03148[c]	Chlorophyll a	C55H71N4O5Mg	0
cpd00149[c]	Co2+	Co	2
cpd00062[c]	UTP	C9H12N2O15P3	-3
cpd00052[c]	CTP	C9H13N3O14P3	-3
cpd00084[c]	L-Cysteine	C3H7NO2S	0
cpd00039[c]	L-Lysine	C6H15N2O2	1
cpd00356[c]	dCTP	C9H13N3O13P3	-3
cpdMG160[c]	1,2-Diacyl-3-beta-D-galactosyl-sn-glycerol (n-C16)	C41H78O5	0
cpdDG160[c]	Digalactosyl-diacylglycerol(n-C16)	C47H89O10	1
cpdMG161[c]	1,2-Diacyl-3-beta-D-galactosyl-sn-glycerol (n-C16:1)	C41H74O5	0
cpdDG161[c]	Digalactosyl-diacylglycerol(n-C16:1)	C47H85O10	1
cpdMG180[c]	1,2-Diacyl-3-beta-D-galactosyl-sn-glycerol (n-C18:0)	C45H82O5	0
cpdDG180[c]	Digalactosyl-diacylglycerol(n-C18:0)	C51H93O10	1
mgdg181[c]	1,2-Diacyl-3-beta-D-galactosyl-sn-glycerol (n-C18:1)	C45H78O5	0
dgdg181[c]	Digalactosyl-diacylglycerol(n-C18:1)	C51H88O10	1
cpdMG181[c]	1,2-Diacyl-3-beta-D-galactosyl-sn-glycerol (n-C18:1)	C45H78O5	0
cpdDG181[c]	Digalactosyl-diacylglycerol(n-C18:1)	C51H89O10	1
cpdMG182[c]	1,2-Diacyl-3-beta-D-galactosyl-sn-glycerol (n-C18:2)	C45H74O5	0
cpdDG182[c]	Digalactosyl-diacylglycerol(n-C18:2)	C51H85O10	1
mgdg183:6:9:12[c]	1,2-Diacyl-3-beta-D-galactosyl-sn-glycerol (n-C18:3)	C45H70O5	0
dgdg183:6:9:12[c]	Digalactosyl-diacylglycerol(n-C18:3)	C51H81O10	1
cpdMG183[c]	1,2-Diacyl-3-beta-D-galactosyl-sn-glycerol (n-C18:3)	C45H70O5	0
cpdDG183[c]	Digalactosyl-diacylglycerol(n-C18:3)	C51H81O10	1
mgdg184:6:9:12:15[c]	1,2-Diacyl-3-beta-D-galactosyl-sn-glycerol (n-C18:4)	C45H66O5	0
dgdg184:6:9:12:15[c]	Digalactosyl-diacylglycerol(n-C18:4)	C51H77O10	1
cpd10515[c]	Fe2+	Fe	2
cpd00028[c]	Heme	C34H30FeN4O4	-2
cpd00015[c]	FAD	C27H31N9O15P2	-2
cpd00357[c]	TTP	C10H14N2O14P3	-3
cpd03220[c]	gamma-Carotene	C40H56	0
cpd00054[c]	L-Serine	C3H7NO3	0
cpd00033[c]	Glycine	C2H5NO2	0
cpd00125[c]	5-10-Methylenetetrahydrofolate	C20H21N7O6	-2
cpd00155[c]	Glycogen	C30H52O26	0
cpd00042[c]	Glutathione	C10H16N3O6S	-1
cpd11313[c]	hemeO	C49H56FeN4O5	-2
cpd11312[c]	hemeA	C49H54FeN4O6	-2
cpd00119[c]	L-Histidine	C6H9N3O2	0
cpd00322[c]	L-Isoleucine	C6H13NO2	0
cpd00107[c]	L-Leucine	C6H13NO2	0
cpd03002[c]	Lipid A disaccharide	C68H128N2O20P	-1
cpd00345[c]	5-Methyltetrahydrofolate	C20H23N7O6	-2
cpd00254[c]	Mg2+	Mg	2
cpd00241[c]	dGTP	C10H13N5O13P3	-3
cpd00115[c]	dATP	C10H13N5O12P3	-3
cpd00129[c]	L-Proline	C5H8NO2	-1
cpd15538[c]	Phosphatidylglycerol dihexadecanoyl	C38H74O10P	-1
cpd15539[c]	Phosphatidylglycerol dihexadec-9-enoyl	C38H70O10P	-1
cpd15540[c]	Phosphatidylglycerol dioctadecanoyl	C42H82O10P	-1
cpd15541[c]	Phosphatidylglycerol dioctadec-11-enoyl	C42H78O10P	-1
cpdPG181[c]	Phosphatidylglycerol (dioctadec-9-enoyl, n-C18:1)	C42H78O10P1	-1
cpdPG182[c]	Phosphatidylglycerol (dioctadec-9-12-dienoyl, n-C18:2)	C42H74O10P1	-1
pg183:6:9:12[c]	Phosphatidylglycerol (dioctadec-6-9-12-trienoyl, n-C18:3)	C42H70O10P1	-1
cpdPG183[c]	Phosphatidylglycerol (dioctadec-9-12-15-trienoyl, n-C18:3)	C42H70O10P1	-1
pg184:6:9:12:15[c]	Phosphatidylglycerol (dioctadec-6-9-12-15-tetraenoyl, n-C18:4)	C42H66O10P1	-1
cpd00066[c]	L-Phenylalanine	C9H11NO2	0
peptido_syn[p]	Peptidoglycan subunit of Synechocystis sp. PCC8603	C40H62N8O21	-2
cpd02229[c]	Bactoprenyl diphosphate	C55H90O7P2	-2
cpd00048[c]	Sulfate	O4S	-2
cpd00264[c]	Spermidine	C7H22N3	3
cSQDG160[c]	Sulfoquinovosyldiacylglycerol (n-C16:0)	C41H79O13S	-1
cSQDG161[c]	Sulfoquinovosyldiacylglycerol (n-C16:1)	C41H75O13S	-1
sqdg183:6:9:12[c]	Sulfoquinovosyldiacylglycerol (n-C18:3)	C45H71O13S	-1
cSQDG180[c]	Sulfoquinovosyldiacylglycerol (n-C18:0)	C45H83O13S	-1
sqdg181[c]	Sulfoquinovosyldiacylglycerol (n-C18:1)	C45H79O13S	-1
cSQDG181[c]	Sulfoquinovosyldiacylglycerol (n-C18:1)	C45H79O13S	-1
cSQDG182[c]	Sulfoquinovosyldiacylglycerol (n-C18:2)	C45H75O13S	-1
cSQDG183[c]	Sulfoquinovosyldiacylglycerol (n-C18:3)	C45H71O13S	-1
sqdg184:6:9:12:15[c]	Sulfoquinovosyldiacylglycerol (n-C18:4)	C45H67O13S	-1
cpd00078[c]	Succinyl-CoA	C25H36N7O19P3S	-4
cpd00161[c]	L-Threonine	C4H9NO3	0
cpd00069[c]	L-Tyrosine	C9H11NO3	0
cpd01631[c]	gamma-Tocopherol	C28H48O2	0
cpd01628[c]	Vitamin E	C29H50O2	0
cpd09850[c]	delta-Tocopherol	C27H46O2	0
cpd09851[c]	beta-Tocopherol	C28H48O2	0
cpd00065[c]	L-Tryptophan	C11H12N2O2	0
cpd00156[c]	L-Valine	C5H11NO2	0
cpd01401[c]	Phylloquinone	C31H46O2	0
cpd11574[c]	Molybdate	H2MoO4	0
cpd10516[c]	Fe3+	Fe	3
cpd00030[c]	Mn2+	Mn	2
cpd11416[c]	Biomass	0	NA
cpd00012[c]	PPi	H2O7P2	-2
cpd11416[p]	Biomass	0	NA
cpd11416[e]	Biomass	0	NA
cpd00242[ca]	Bicarbonate	CHO3	-1
cpd00067[ca]	H+	H	1
cpd00001[ca]	H2O	H2O	0
cpd00011[ca]	CO2	CO2	0
ficytc_6[l]	Ferricytochrome c6	R	3
cpd16503[l]	Plastoquinol-9	C53H82O2	0
focytc_6[l]	Ferrocytochrome c6	R	2
cpd07274[l]	Plastoquinone 9	C53H80O2	0
cpd16503[p]	Plastoquinol-9	C53H82O2	0
ficytc_6[p]	Ferricytochrome c6	R	3
cpd07274[p]	Plastoquinone 9	C53H80O2	0
focytc_6[p]	Ferrocytochrome c6	R	2
cpd12265[p]	Oxidized plastocyanin	noformula	2
cpd12239[p]	Reduced plastocyanin	noformula	1
cpd12265[l]	Oxidized plastocyanin	noformula	2
cpd12239[l]	Reduced plastocyanin	noformula	1
CDPDG182[c]	CDP-1,2-dioctadec-9-12-dienoylglycerol	C48H79N3O15P2	-2
CDPDG183[c]	CDP-1,2-dioctadec-9-12-15-trienoylglycerol	C48H75N3O15P2	-2
cpd00137[p]	Citrate	C6H5O7	-3
cpd00137[c]	Citrate	C6H5O7	-3
cpd00149[p]	Co2+	Co	2
cpd00204[e]	CO	CHO	1
cpd00204[p]	CO	CHO	1
cpd00058[e]	Cu2+	Cu	2
cpd00058[p]	Cu2+	Cu	2
cpd00007[l]	O2	O2	0
cpd00001[l]	H2O	H2O	0
cpd00007[p]	O2	O2	0
cpd00001[p]	H2O	H2O	0
cpd03914[c]	Cob(II)yrinate diamide	C45H57CoN6O12	-3
cpd03915[c]	Cob(I)yrinate diamide	C45H57CoN6O12	-4
cdpdodec9eg[c]	CDP-1,2-dioctadec-9-enoylglycerol	C48H83N3O15P2	-2
cdpdodec6912eg[c]	CDP-1,2-dioctadec-6-9-12-trienoylglycerol	C48H75N3O15P2	-2
cdpdodec691215eg[c]	CDP-1,2-dioctadec-6-9-12-15-tetraenoylglycerol	C48H71N3O15P2	-2
cpfdxr22[c]	Reduced ferredoxin	Fe2S2X	-1
cpfdxo22[c]	Oxidized ferredoxin	Fe2S2X	0
cpd12458[c]	Stearoyl-[acyl-carrier protein]	C18H35ORS	0
cpd00043[c]	UDP-galactose	C15H22N2O17P2	-2
cpd00014[c]	UDP	C9H12N2O12P2	-2
cpd00024[e]	2-Oxoglutarate	C5H4O5	-2
cpd00029[e]	Acetate	C2H3O2	-1
cpd00063[e]	Ca2+	Ca	2
cpd00137[e]	Citrate	C6H5O7	-3
cpd00011[e]	CO2	CO2	0
cpd00149[e]	Co2+	Co	2
cpd01015[e]	Cyanate	CNO	-1
cpd00082[e]	D-Fructose	C6H12O6	0
cpd10515[e]	Fe2+	Fe	2
cpd10516[e]	Fe3+	Fe	3
cpd00106[e]	Fumarate	C4H2O4	-2
cpd00106[e]	Fumarate	C4H2O4	-2
cpd08376[e]	2-(beta-D-Glucosyl)-sn-glycerol	C9H18O8	0
cpd00027[e]	D-Glucose	C6H12O6	0
cpd00155[e]	Glycogen	C30H52O26	0
cpd00067[e]	H+	H	1
cpd11640[e]	H2	H2	0
cpd00242[e]	Bicarbonate	CHO3	-1
cpd00001[e]	H2O	H2O	0
cpd16336[e]	Isoprene	C5H8	0
cpd00035[e]	L-Alanine	C3H7NO2	0
cpd00051[e]	L-Arginine	C6H15N4O2	1
cpd00023[e]	L-Glutamate	C5H8NO4	-1
cpd00053[e]	L-Glutamine	C5H10N2O3	0
cpd00119[e]	L-Histidine	C6H9N3O2	0
cpd00107[e]	L-Leucine	C6H13NO2	0
cpd00039[e]	L-Lysine	C6H15N2O2	1
cpd00130[e]	L-Malate	C4H4O5	-2
cpd00129[e]	L-Proline	C5H8NO2	-1
cpd00054[e]	L-Serine	C3H7NO3	0
cpd00254[e]	Mg2+	Mg	2
cpd00030[e]	Mn2+	Mn	2
cpd11574[e]	Molybdate	H2MoO4	0
cpd00013[e]	NH3	H4N	1
cpd00244[e]	Ni2+	Ni	2
cpd00209[e]	Nitrate	NO3	-1
cpd00007[e]	O2	O2	0
hvphoton1[e]	Photosystem 1 photon	Z	0
hvphoton2[e]	Photosystem 2 photon	Z	0
cpd00009[e]	Phosphate	HO4P	-2
cpd00205[e]	K+	K	1
cpd00118[e]	Putrescine	C4H14N2	2
cpd00020[e]	Pyruvate	C3H3O3	-1
cpd00971[e]	Na+	Na	1
cpd00264[e]	Spermidine	C7H22N3	3
cpd00036[e]	Succinate	C4H4O4	-2
cpd00076[e]	Sucrose	C12H22O11	0
cpd00048[e]	Sulfate	O4S	-2
cpd00073[e]	Urea	CH4N2O	0
cpd00034[e]	Zn2+	Zn	2
cpd00082[p]	D-Fructose	C6H12O6	0
cpd00082[c]	D-Fructose	C6H12O6	0
cpd11420[c]	Oxidized thioredoxin	C6H7NO2R2S2	0
cpd11421[c]	Reduced thioredoxin	C6H9NO2R2S2	0
cpd00106[p]	Fumarate	C4H2O4	-2
cpd00106[c]	Fumarate	C4H2O4	-2
cpd00080[c]	Glycerol-3-phosphate	C3H8O6P	-1
cpd15309[c]	1,2-Diacyl-sn-glycerol dihexadecanoyl	C35H68O5	0
cpd15310[c]	1,2-Diacyl-sn-glycerol dihexadec-9-enoyl	C35H64O5	0
cpd15311[c]	1,2-Diacyl-sn-glycerol dioctadecanoyl	C39H76O5	0
cpd15312[c]	1,2-Diacyl-sn-glycerol dioctadec-11-enoyl	C39H72O5	0
cp_DLiGl[c]	1,2-Diacyl-sn-glycerol (dioctadec-9-12-dienoyl, n-C18:2)	C39H68O5	0
cp_DaLGl[c]	1,2-Diacyl-sn-glycerol (dioctadec-9-12-15-trienoyl, n-C18:3)	C39H64O5	0
cpd08376[p]	2-(beta-D-Glucosyl)-sn-glycerol	C9H18O8	0
cpd08376[c]	2-(beta-D-Glucosyl)-sn-glycerol	C9H18O8	0
cpd00089[c]	D-Glucose 1-phosphate	C6H12O9P	-1
cpd15413[c]	branching glycogen	C30H52O26	0
cpd00027[p]	D-Glucose	C6H12O6	0
cpd00033[p]	Glycine	C2H5NO2	0
cpd11640[c]	H2	H2	0
cpd00971[p]	Na+	Na	1
cpd00426[c]	Homogentisate	C8H7O4	-1
cpd02172[c]	Solanesyl diphosphate	C45H74O7P2	-2
cpd00011[c]	CO2	CO2	0
cpd_msbq[c]	2-methyl-6-solanyl-1,4-benzoquinone	C52H80O2	0
cpd16336[c]	Isoprene	C5H8	0
cpd00205[p]	K+	K	1
cpd00130[p]	L-Malate	C4H4O5	-2
cpd00130[c]	L-Malate	C4H4O5	-2
cpd08301[c]	2-C-methyl-D-erythritol2-4-cyclodiphosphate	C5H10O9P2	-2
cpd08615[c]	1-Hydroxy-2-methyl-2-butenyl 4-diphosphate	C5H10O8P2	-2
12dgr181:9[c]	1,2-Diacyl-sn-glycerol (dioctadec-9-enoyl, n-C18:1)	C39H72O5	0
12dgr183:6:9:12[c]	1,2-Diacyl-sn-glycerol (dioctadec-6-9-12-trienoyl, n-C18:3)	C39H64O5	0
12dgr184:6:9:12:15[c]	1,2-Diacyl-sn-glycerol (dioctadec-6-9-12-15-tetraenoyl, n-C18:4)	C39H60O5	0
cpd00254[p]	Mg2+	Mg	2
cpd02762[c]	Mg-Protoporphyrin IX 13-monomethyl ester	C35H33N4O4Mg	0
cpd08629[c]	13(1)-Hydroxy-Mg-protoporphyrin IX 13-monomethyl ester	C35H33N4O5Mg	0
cpd08630[c]	13(1)-Oxo-Mg-protoporphyrin IX 13-monomethyl ester	C35H31N4O5Mg	0
cpd08631[c]	Divinylprotochlorophyllide	C35H28N4O5Mg	-1
cpd00019[c]	S-Adenosyl-homocysteine	C14H20N6O5S	0
cpd00011[p]	CO2	CO2	0
cpd00013[p]	NH3	H4N	1
cpd00244[p]	Ni2+	Ni	2
cpd00244[c]	Ni2+	Ni	2
cpd00209[p]	Nitrate	NO3	-1
cpd00209[c]	Nitrate	NO3	-1
cpd00007[ca]	O2	O2	0
cpPGP182[c]	Phosphatidylglycerophosphate (dioctadec-9-12-dienoyl, n-C18:2)	C42H73O13P2	-3
cpPGP183[c]	Phosphatidylglycerophosphate (dioctadec-9-12-15-trienoyl, n-C18:3)	C42H69O13P2	-3
cpdPGP181:9[c]	Phosphatidylglycerophosphate (dioctadec-9-enoyl, n-C18:1)	C42H77O13P2	-3
pgp183:6:9:12[c]	Phosphatidylglycerophosphate (dioctadec-6-9-12-trienoyl, n-C18:3)	C42H69O13P2	-3
pgp184:6:9:12:15[c]	Phosphatidylglycerophosphate (dioctadec-6-9-12-15-tetraenoyl, n-C18:4)	C42H65O13P2	-3
cpd00046[c]	CMP	C9H13N3O8P	-1
cpd16898[c]	3-Hydroxybutyryl-CoA	C25H39N7O18P3S	-3
cpd_phbg[c]	Growing PHB granule	-	-
cmpd_PHB[c]	PHB granule	-	-
hvphoton1[p]	Photosystem 1 photon	Z	0
hvphoton2[p]	Photosystem 2 photon	Z	0
hvphoton1[c]	Photosystem 1 photon	Z	0
hvphoton2[c]	Photosystem 2 photon	Z	0
cpd03205[c]	Phytoene	C40H64	0
cpd03206[c]	Phytofluene	C40H62	0
cpd03215[c]	zeta-Carotene	C40H60	0
cpd02201[c]	4-phosphopantothenate	C9H16NO8P	-2
cpd00096[c]	CDP	C9H13N3O11P2	-2
cpd02666[c]	(R)-4'-Phosphopantothenoyl-L-cysteine	C12H21N2O9PS	-2
peptido_syn[c]	Peptidoglycan subunit of Synechocystis sp. PCC8603	C40H62N8O21	-2
cpd03495[c]	Undecaprenyl-diphospho-N-acetylmuramoyl--N-acetylglucosamine-L-ala-D-glu-meso-2-6-diaminopimeloyl-D-ala-D-ala	C95H152N8O28P2	-4
cpd00020[p]	Pyruvate	C3H3O3	-1
cpd00020[c]	Pyruvate	C3H3O3	-1
cpd03420[c]	Precorrin 3A	C43H44N4O16	-6
cpd03833[c]	Precorrin 3B	C43H44N4O17	-6
cpd00202[c]	DMAPP	C5H10O7P2	-2
cpd03211[c]	15-cis-Phytoene	C40H64	0
cpd14598[c]	3,4-Dehydrolycopene	C40H54	0
cpd00871[c]	D-Ribulose 1,5-bisphosphate	C5H10O11P2	-2
cpd00871[ca]	D-Ribulose 1,5-bisphosphate	C5H10O11P2	-2
cpd00668[c]	2-Acetolactate	C5H7O4	-1
cpd00025[c]	H2O2	H2O2	0
cpd00040[c]	Glyoxalate	C2HO3	-1
cpd00843[c]	Tartronate semialdehyde	C3H3O4	-1
cpd00056[c]	TPP	C12H17N4O7P2S	-1
cpd03049[c]	2-Hydroxyethyl-ThPP	C14H21N4O8P2S	-1
cpd00179[c]	Maltose	C12H22O11	0
cpd00027[c]	D-Glucose	C6H12O6	0
cpd00338[c]	5-Aminolevulinate	C5H9NO3	0
cpd00689[c]	Porphobilinogen	C10H13N2O4	-1
cpd02656[c]	6-7-Dimethyl-8--1-D-ribityllumazine	C13H18N4O6	0
cpd02882[c]	4--1-D-Ribitylamino-5-aminouracil	C9H16N4O6	0
cpd00755[c]	Hydroxymethylbilane	C40H38N4O17	-8
cpd00068[c]	ITP	C10H12N4O14P3	-3
cpd00446[c]	cAMP	C10H11N5O6P	-1
cpd00133[c]	Nicotinamide	C6H6N2O	0
cpd00251[c]	ADP-ribose	C15H21N5O14P2	-2
cpd00924[c]	AppppA	C20H24N10O19P4	-4
cpd00018[c]	AMP	C10H13N5O7P	-1
cpd00655[c]	Dephospho-CoA	C21H33N7O13P2S	-2
cpd00073[c]	Urea	CH4N2O	0
cpd00421[c]	Triphosphate	HO10P3	-4
cpd00355[c]	Nicotinamide ribonucleotide	C11H15N2O8P	0
cpd00146[c]	Carbamoylphosphate	CH3NO5P	-1
cpd00091[c]	UMP	C9H12N2O9P	-1
cpd00050[c]	FMN	C17H20N4O9P	-1
cpd00837[c]	S-Adenosylmethioninamine	C14H24N6O3S	2
cpd00114[c]	IMP	C10H12N4O8P	-1
cpd00101[c]	ribose-5-phosphate	C5H10O8P	-1
cpd00128[c]	Adenine	C5H5N5	0
cpd00182[c]	Adenosine	C10H13N5O4	0
cpd00045[c]	Adenosine 3-5-bisphosphate	C10H13N5O10P2	-2
cpd00638[c]	Deamido-NAD	C21H24N6O15P2	-2
cpd00103[c]	PRPP	C5H10O14P3	-3
cpd00135[c]	Homocysteine	C4H9NO2S	0
cpd00061[c]	Phosphoenolpyruvate	C3H3O6P	-2
cpd00196[c]	Acetylphosphate	C2H4O5P	-1
cpd00029[c]	Acetate	C2H3O2	-1
cpd00279[c]	Acetoacetyl-CoA	C25H36N7O18P3S	-4
cpd02097[c]	L-Glutamyl 5-phosphate	C5H9NO7P	-1
cpd00858[c]	L-Glutamate5-semialdehyde	C5H9NO3	0
cpd00477[c]	N-Acetyl-L-glutamate	C7H9NO5	-2
cpd00186[c]	D-Glutamate	C5H8NO4	-1
cpd00281[c]	GABA	C4H9NO2	0
cpd00260[c]	Isocitrate	C6H5O7	-3
cpd03187[c]	Oxalosuccinate	C6H3O7	-3
cpd00111[c]	Oxidized glutathione	C20H30N6O12S2	-2
cpd00493[c]	Pyridoxamine phosphate	C8H12N2O5P	-1
cpd00016[c]	Pyridoxal phosphate	C8H8N06P	-2
cpd00478[c]	Pyridoxine phosphate	C8H11NO6P	-1
cpd00026[c]	UDP-glucose	C15H22N2O17P2	-2
cpd00079[c]	D-glucose-6-phosphate	C6H12O9P	-1
cpd01476[c]	Protoporphyrin	C34H32N4O4	-2
cpd00031[c]	GDP	C10H13N5O11P2	-2
cpd00126[c]	GMP	C10H13N5O8P	-1
cpd00032[c]	Oxaloacetate	C4H2O5	-2
cpd00117[c]	D-Alanine	C3H7NO2	0
cpd00036[c]	Succinate	C4H4O4	-2
cpd00982[c]	FADH2	C27H33N9O15P2	-2
cpd00142[c]	Acetoacetate	C4H5O3	-1
cpd00037[c]	UDP-N-acetylglucosamine	C17H25N3O17P2	-2
cpd00492[c]	N-Acetyl-D-mannosamine	C8H15NO6	0
cpd02611[c]	N-Acetyl-D-glucosamine1-phosphate	C8H15NO9P	-1
cpd00861[c]	UDP-N-acetyl-D-mannosamine	C17H25N3O17P2	-2
cpd00047[c]	Formate	CHO2	-1
cpd02978[c]	7,8-Dihydroneopterin 3'-triphosphate	C9H13N5O13P3	-3
cpd00957[c]	2,5-Diamino-6-(5'-phosphoribosylamino)-4-pyrimidineone	C9H15N5O8P	-1
cpd00697[c]	cGMP	C10H11N5O7P	-1
cpd00516[c]	meso-2,6-Diaminopimelate	C7H14N2O4	0
cpd01155[c]	Cadaverine	C5H16N2	2
cpd00180[c]	Oxalate	C2O4	-2
cpd00830[c]	4-Hydroxy-2-oxoglutarate	C5H4O6	-2
cpd00139[c]	Glycolate	C2H3O3	-1
cpd01977[c]	4-Phospho-L-aspartate	C4H7NO7P	-1
cpd03470[c]	Iminoaspartate	C4H3NO4	-2
cpd00085[c]	beta-Alanine	C3H7NO2	0
cpd01017[c]	L-Cysteinylglycine	C5H10N2O3S	0
cpd00506[c]	gamma-Glutamylcysteine	C8H13N2O5S	-1
cpd00193[c]	APS	C10H12N5O10PS	-2
cpd00044[c]	3-phosphoadenylylsulfate	C10H12N5O13P2S	-3
cpd00367[c]	Cytidine	C9H13N3O5	0
cpd00064[c]	Ornithine	C5H13N2O2	1
cpd00274[c]	Citrulline	C6H13N3O3	0
cpd00152[c]	Agmatine	C5H16N4	2
cpd00722[c]	O-Acetyl-L-serine	C5H9NO4	0
cpd00145[c]	Hydroxypyruvate	C3H3O4	-1
cpd00793[c]	Thiamine phosphate	C12H17N4O4PS	0
cpd03450[c]	Succinatesemialdehyde-thiamindiphosphateanion	C16H22N4O10P2S	-2
cpd00482[c]	2-Phospho-D-glycerate	C3H5O7P	-2
cpd02820[c]	UDP-N-acetylglucosamine enolpyruvate	C20H26N3O19P2	-3
cpd00359[c]	Indole	C8H7N	0
cpd00143[c]	Phenylpyruvate	C9H7O3	-1
cpd00350[c]	Farnesyldiphosphate	C15H26O7P2	-2
cpd02169[c]	Presqualene diphosphate	C30H50O7P2	-2
cpd00221[c]	D-Lactate	C3H5O3	-1
cpd00191[c]	3-Oxopropanoate	C3H3O3	-1
cpd02431[c]	1-Pyrroline-5-carboxylate	C5H6NO2	-1
cpd00071[c]	Acetaldehyde	C2H4O	0
cpd00199[c]	4-Oxobutanoate	C4H5O3	-1
cpd00351[c]	Saccharopine	C11H19N2O6	-1
cpd00090[c]	IDP	C10H12N4O11P2	-2
cpd00616[c]	Pretyrosine	C10H12NO5	-1
cpd00868[c]	p-hydroxyphenylpyruvate	C9H7O4	-1
cpd00363[c]	Ethanol	C2H6O	0
cpd00072[c]	D-fructose-6-phosphate	C6H12O9P	-1
cpd00290[c]	D-fructose-1,6-bisphosphate	C6H12O12P2	-2
cpd01693[c]	6-Phosphosucrose	C12H21O14P	-2
cpd00288[c]	D-Glucosamine phosphate	C6H14NO8P	0
cpd00235[c]	D-mannose-6-phosphate	C6H12O9P	-1
cpd00076[c]	Sucrose	C12H22O11	0
cpd00911[c]	6-phospho-D-glucono-1-5-lactone	C6H10O9P	-1
cpd00867[c]	Inositol 1-phosphate	C6H12O9P	-1
cpd00095[c]	Glycerone-phosphate	C3H6O6P	-1
cpd00100[c]	Glycerol	C3H8O3	0
cpd00485[c]	D-Mannose 1-phosphate	C6H12O9P	-1
cpd00083[c]	GDP-mannose	C16H23N5O16P2	-2
cpd00900[c]	GDP-4-dehydro-D-rhamnose	C16H21N5O15P2	-2
cpd01536[c]	GDP-L-galactose	C16H23N5O16P2	-2
cpd00381[c]	L-Cystine	C6H12N2O4S2	0
cpd00706[c]	Mercaptopyruvate	C3H3O3S	-1
cpd00239[c]	Hydrogen Sulfide	H2S	0
cpd01504[c]	3-Aminopropanal	C3H8NO	1
cpd00330[c]	Dihydrofolate	C19H19N7O6	-2
cpd00387[c]	ADP-glucose	C16H23N5O15P2	-2
cpd00348[c]	D-Galactose 1-phosphate	C6H11O9P	-2
cpd00810[c]	Orotidylic acid	C10H11N2O11P	-2
cpd00092[c]	Uracil	C4H4N2O2	0
cpd00307[c]	Cytosine	C4H5N3O	0
cpd00093[c]	Anthranilate	C7H6NO2	-1
cpd00094[c]	2-Oxobutyrate	C4H5O3	-1
cpd00102[c]	Glyceraldehyde3-phosphate	C3H6O6P	-1
cpd00428[c]	2-Oxopropanal	C3H4O2	0
cpd00157[c]	Glycerone	C3H6O3	0
cpd00448[c]	D-Glyceraldehyde	C3H6O3	0
cpd00105[c]	D-Ribose	C5H10O5	0
cpd00171[c]	D-Ribulose5-phosphate	C5H10O8P	-1
cpd00475[c]	Ribose 1-phosphate	C5H10O8P	-1
cpd00203[c]	1,3-Bisphospho-D-glycerate	C3H6O10P2	-2
cpd00510[c]	deoxyribose-5-phosphate	C5H10O7P	-1
cpd00198[c]	D-Xylulose5-phosphate	C5H10O8P	-1
cpd00236[c]	D-Erythrose4-phosphate	C4H8O7P	-1
cpd01775[c]	Phosphoribosyl-ATP	C15H21N5O20P4	-4
cpd01982[c]	5-Phosphoribosylamine	C5H12NO7P	0
cpd02642[c]	N-5-phosphoribosyl-anthranilate	C12H14NO9P	-2
cpd02375[c]	Adenylosuccinate	C14H15N5O11P	-3
cpd02152[c]	L-Argininosuccinate	C10H17N4O6	-1
cpd00200[c]	4MOP	C6H9O3	-1
cpd00108[c]	Galactose	C2H12O6	0
cpd00113[c]	Isopentenyldiphosphate	C5H10O7P2	-2
cpd02884[c]	FAICAR	C10H14N4O9P	-1
cpd00497[c]	XMP	C10H12N4O9P	-1
cpd00177[c]	dADP	C10H13N5O9P2	-2
cpd00731[c]	D-Alanyl-D-alanine	C6H12N2O3	0
cpd01758[c]	N-Acetylputrescine	C6H15N2O	1
cpd00641[c]	L-Histidinol	C6H12N3O	1
cpd01324[c]	L-Histidinal	C6H10N3O	1
cpd00120[c]	Butyryl-CoA	C25H38N7O17P3S	-4
cpd03123[c]	3-Oxohexanoyl-CoA	C27H40N7O18P3S	-4
cpd00121[c]	L-Inositol	C6H12O6	0
cpd02230[c]	Inositol 4-phosphate	C6H12O9P	-1
cpd02484[c]	Inositol 3-phosphate	C6H12O9P	-1
cpd02498[c]	2,3-Dihydroxy-isovalerate	C5H9O4	-1
cpd00123[c]	3-Methyl-2-oxobutanoate	C5H7O3	-1
cpd01646[c]	2-Isopropylmalate	C7H10O5	-2
cpd00347[c]	5-10-Methenyltetrahydrofolate	C20H20N7O6	-1
cpd00712[c]	2-Dehydropantoate	C6H9O4	-1
cpd00311[c]	Guanosine	C10H13N5O5	0
cpd00214[c]	Hexadecanoate	C16H31O2	-1
cpd00134[c]	Palmitoyl-CoA	C37H63N7O17P3S	-3
cpd00424[c]	Cystathionine	C7H14N2O4S	0
cpd00790[c]	O-Acetyl-L-homoserine	C6H11NO4	0
cpd00136[c]	4-Hydroxybenzoate	C7H5O3	-1
cpd02476[c]	4-(beta-D-Glucosyloxy)benzoate	C13H15O8	-1
cpd02300[c]	Resacetophenone	C8H8O3	0
cpd00331[c]	cis-Aconitate	C6H3O6	-3
cpd00229[c]	Glycolaldehyde	C2H4O2	0
cpd01844[c]	Propionyl phosphate	C3H6O5P	-1
cpd00141[c]	Propionate	C3H5O2	-1
cpd03480[c]	2-Hydroxyphenylacetate	C8H7O3	-1
cpd00219[c]	Prephenate	C10H8O6	-2
cpd00464[c]	alpha-Tolualdehyde	C8H8O	0
cpd00223[c]	Glycerate	C3H5O4	-1
cpd01101[c]	Carbamate	CH2NO2	-1
cpd00343[c]	N-Carbamoyl-L-aspartate	C5H6N2O5	-2
cpd00147[c]	5-Methylthioadenosine	C11H15N5O3S	0
cpd02574[c]	methylthioribose-1-phosphate	C6H12O7PS	-1
cpd00306[c]	Xylitol	C5H12O5	0
cpd00154[c]	Xylose	C5H10O5	0
cpd00160[c]	Cholesterol	C27H46O	0
cpd00857[c]	Provitamin D3	C27H44O	0
cpd00809[c]	O-Phospho-L-homoserine	C4H9NO6P	-1
cpd00162[c]	Aminoethanol	C2H8NO	1
cpd00285[c]	Phosphoethanolamine	C2H7NO4P	-1
cpd02069[c]	3-Phosphonooxypyruvate	C3H3O7P	-2
cpd00190[c]	beta-D-Glucose	C6H12O6	0
cpd00170[c]	Gluconolactone	C6H10O6	0
cpd00284[c]	6-Phospho-D-gluconate	C6H11O10P	-2
cpd00294[c]	dAMP	C10H13N5O6P	-1
cpd00184[c]	Thymidine	C10H14N2O5	0
cpd00298[c]	dTMP	C10H14N2O8P	-1
cpd00610[c]	D-Glutamine	C5H10N2O3	0
cpd00863[c]	beta-D-Glucose 6-phosphate	C6H12O9P	-1
cpd00238[c]	Sedoheptulose7-phosphate	C7H14O10P	-1
cpd02605[c]	2-isopropyl-3-oxosuccinate	C7H8O5	-2
cpd00283[c]	Geranyl diphosphate	C10H18O7P2	-2
cpd00853[c]	DPG	C3H5O10P2	-3
cpd00449[c]	Dihydrolipoamide	C8H17NOS2	0
cpd00213[c]	Lipoamide	C8H15NOS2	0
cpd00836[c]	S-Acetyldihydrolipoamide	C10H19NO2S2	0
cpd00215[c]	Pyridoxal	C8H9NO3	0
cpd00715[c]	4-Pyridoxolactone	C8H7NO3	0
cpd00932[c]	5-O--1-Carboxyvinyl-3-phosphoshikimate	C10H10O10P	-3
cpd08210[c]	ADC	C10H10NO5	-1
cpd00658[c]	Isochorismate	C10H8O6	-2
cpd02182[c]	(R)-S-Lactoylglutathione	C13H20N3O8S	-1
cpd00227[c]	L-Homoserine	C4H9NO3	0
cpd00346[c]	L-Aspartate4-semialdehyde	C4H7NO3	0
cpd00231[c]	Dihydrobiopterin	C9H13N5O3	0
cpd00233[c]	Tetrahydrobiopterin	C9H15N5O3	0
cpd02857[c]	DAHP	C7H11O10P	-2
cpd00349[c]	Sedoheptulose 1,7-bisphosphate	C7H14O13P2	-2
cpd00296[c]	dGMP	C10H13N5O7P	-1
cpd00277[c]	Deoxyguanosine	C10H13N5O4	0
cpd00295[c]	dGDP	C10H13N5O10P2	-2
cpd00282[c]	S-Dihydroorotate	C5H5N2O4	-1
cpd00247[c]	Orotate	C5H3N2O4	-1
cpd00150[c]	HCN	CHN	0
cpd00268[c]	Thiosulfate	O3S2	-2
cpd00081[c]	Sulfite	HO3S	-1
cpd01211[c]	Thiocyanate	CNS	-1
cpd00269[c]	2-Oxoadipate	C6H6O5	-2
cpd00413[c]	Glutaryl-CoA	C26H38N7O19P3S	-4
cpd02234[c]	(R)-3-Hydroxybutanoyl-CoA	C25H39N7O18P3S	-3
cpd00434[c]	4-Aminobutanal	C4H10NO	1
cpd00876[c]	3-Hydroxyisobutyrate	C4H7O3	-1
cpd00287[c]	3-Oxo-2-methylpropanoate	C4H5O3	-1
cpd03671[c]	D-Glucosamine1-phosphate	C6H14NO8P	0
cpd00289[c]	Geranylgeranyl diphosphate	C20H34O7P2	-2
cpd03214[c]	Phytyl diphosphate	C20H40O7P2	-2
cpd02168[c]	Prephytoene diphosphate	C40H66O7P2	-2
cpd00297[c]	dTDP	C10H14N2O11P2	-2
cpd00299[c]	dUMP	C9H12N2O8P	-1
cpd00978[c]	dUDP	C9H12N2O11P2	-2
cpd00412[c]	Deoxyuridine	C9H12N2O5	0
cpd00358[c]	dUTP	C9H12N2O14P3	-3
cpd00305[c]	Thiamin	C12H17N4OS	1
cpd00508[c]	2-keto-3-methyl-valerate	C6H9O3	-1
cpd00683[c]	Dihydropteroate	C14H13N6O3	-1
cpd00453[c]	1,2-Propanediol	C3H8O2	0
cpd00334[c]	L-Lactaldehyde	C3H6O2	0
cpd02345[c]	L-Glutamate1-semialdehyde	C5H9NO3	0
cpd00342[c]	N-Acetylornithine	C7H14N2O3	0
cpd00918[c]	2-Acetamido-5-oxopentanoate	C7H10NO4	-1
cpd02120[c]	Dihydrodipicolinate	C7H5NO4	-2
cpd02197[c]	5-Formyltetrahydrofolate	C20H21N7O7	-2
cpd00533[c]	dCDP	C9H13N3O10P2	-2
cpd00626[c]	dTDPglucose	C16H24N2O16P2	-2
cpd02210[c]	Indoleglycerol phosphate	C11H13NO6P	-1
cpd00376[c]	Bilirubin	C33H34N4O6	-2
cpd00389[c]	Biliverdin	C33H32N4O6	-2
cpd00383[c]	Shikimate	C7H9O5	-1
cpd02030[c]	Shikimate 3-phosphate	C7H9O8P	-2
cpd01716[c]	3-Dehydroshikimate	C7H7O5	-1
cpd01725[c]	5-Dehydroshikimate	C7H7O5	-1
cpd00408[c]	Pantoate	C6H11O4	-1
cpd00644[c]	Pantothenate	C9H16NO5	-1
cpd00418[c]	nitric oxide	NO	0
cpd00659[c]	Nitrous oxide	N2O	0
cpd00430[c]	Phenyl acetate	C8H8O2	0
cpd00452[c]	Phenylacetyl-CoA	C29H38N7O17P3S	-4
cpd01647[c]	2-Phenylacetamide	C8H9NO	0
cpd00802[c]	D-fructose-1-phosphate	C6H12O9P	-1
cpd02552[c]	n-acetylglutamyl-phosphate	C7H10NO8P	-2
cpd00486[c]	Indoleacetaldehyde	C10H9NO	0
cpd00703[c]	Indoleacetate	C10H8NO2	-1
cpd00501[c]	beta-D-Glucose 1-phosphate	C6H11O9P	-2
cpd02698[c]	N-Succinyl-L-2,6-diaminopimelate	C11H16N2O7	-2
cpd00504[c]	LL-2,6-Diaminopimelate	C7H14N2O4	0
cpd01242[c]	Thyminose	C5H10O4	0
cpd00521[c]	dTDP-4-oxo-6-deoxy-D-glucose	C16H22N2O15P2	-2
cpd00522[c]	dTDP-4-oxo-L-rhamnose	C16H22N2O15P2	-2
cpd02113[c]	dTDP-rhamnose	C16H24N2O15P2	-2
cpd00890[c]	UDP-N-acetylmuramoyl-L-alanine	C23H33N4O20P2	-3
cpd00525[c]	UDP-N-acetylmuramoyl-L-alanyl-D-glutamate	C28H39N5O23P2	-4
cpd02964[c]	UDP-N-acetylmuramoyl-L-alanyl-D-gamma-glutamyl-meso-2-6-diaminopimelate	C35H51N7O26P2	-4
cpd00559[c]	Supraene	C30H50	0
cpd00873[c]	Nicotinate ribonucleotide	C11H13NO9P	-1
cpd00807[c]	L-histidinol-phosphate	C6H12N3O4P	0
cpd00834[c]	Phosphopantetheine	C11H22N2O7PS	-1
cpd02569[c]	2-Oxo-3-hydroxyisovalerate	C5H7O4	-1
cpd00443[c]	4-Aminobenzoate	C7H6NO2	-1
cpd00954[c]	6-hydroxymethyl dihydropterin	C7H9N5O2	0
cpd02920[c]	7,8-Dihydropterin pyrophosphate	C7H9N5O8P2	-2
cpd00699[c]	5-Dehydroquinate	C7H9O6	-1
cpd01881[c]	3-Indoleacetonitrile	C10H8N2	0
cpd01747[c]	Indole-3-acetamide	C10H10N2O	0
cpd03456[c]	S-sulfocysteine	C3H6NO5S2	-1
cpd00774[c]	UroporphyrinogenIII	C40H36N4O16	-8
cpd01973[c]	4-Guanidinobutanamide	C5H13N4O	1
cpd00762[c]	4-Guanidinobutanoate	C5H11N3O2	0
cpd00764[c]	7-8-Diaminononanoate	C9H21N2O2	1
cpd01311[c]	Dethiobiotin	C10H17N2O3	-1
cpd00773[c]	UDP-N-acetylmuramate	C20H28N3O19P2	-3
cpd01620[c]	Precorrin 2	C42H40N4O16	-8
cpd02083[c]	Coproporphyrinogen III	C36H40N4O8	-4
cpd00782[c]	Pimeloyl-CoA	C28H42N7O19P3S	-4
cpd00800[c]	8-Amino-7-oxononanoate	C9H17NO3	0
cpd00791[c]	ProtoporphyrinogenIX	C34H38N4O4	-2
cpd02654[c]	4-Methyl-5--2-phosphoethyl-thiazole	C6H9NO4PS	-1
cpd02894[c]	4-Amino-2-methyl-5-diphosphomethylpyrimidine	C6H9N3O7P2	-2
cpd00805[c]	D-Tagatose 6-phosphate	C6H12O9P	-1
cpd02371[c]	D-Tagatose 1,6-biphosphate	C6H12O12P2	-2
cpd00930[c]	imidazole acetol-phosphate	C6H8N2O5P	-1
cpd01974[c]	4-Hydroxy-L-glutamate	C5H8NO5	-1
cpd00845[c]	4-Trimethylammoniobutanal	C7H16NO	1
cpd00923[c]	3-Hydroxy-N6,N6,N6-trimethyl-L-lysine	C9H21N2O3	1
cpd00851[c]	trans-4-Hydroxy-L-proline	C5H8NO3	-1
cpd02625[c]	3-Hydroxy-L-1-pyrroline-5-carboxylate	C5H6NO3	-1
cpd02333[c]	Quinolinate	C7H3NO4	-2
cpd02843[c]	D-erythro-imidazole-glycerol-phosphate	C6H10N2O6P	-1
cpd00931[c]	5-Amino-6--5-phosphoribosylaminouracil	C9H14N4O9P	-1
cpd02720[c]	5-Amino-6--5-phosphoribitylaminouracil	C9H16N4O9P	-1
cpd02961[c]	Dihydroneopterin	C9H13N5O4	0
cpd00956[c]	1-(2-carboxyphenylamino)-1-deoxyribulose 5-phosphate	C12H14NO9P	-2
cpd00976[c]	dIDP	C10H12N4O10P2	-2
cpd00977[c]	dITP	C10H12N4O13P3	-3
cpd01015[c]	Cyanate	CNO	-1
cpd02216[c]	Mg-protoporphyrin IX	C34H30N4O4Mg	-1
cpd01502[c]	Citraconate	C5H4O4	-2
cpd01700[c]	D-Citramalate	C5H6O5	-2
cpd01710[c]	2-Isopropylmaleate	C7H8O4	-2
cpd02693[c]	3-Isopropylmalate	C7H10O5	-2
cpd01772[c]	Succinylbenzoate	C11H8O5	-2
cpd02021[c]	Succinylbenzoyl-CoA	C32H40N7O20P3S	-4
cpd03451[c]	SHCHC	C11H10O6	-2
cpd01777[c]	Phosphoribosyl-AMP	C15H21N5O14P2	-2
cpd02979[c]	phosphoribosylformiminoaicar-phosphate	C15H23N5O15P2	-2
cpd03052[c]	Imidazole acetaldehyde	C5H6N2O	0
cpd01831[c]	4-Imidazoleacetate	C5H5N2O2	-1
cpd02394[c]	GAR	C7H15N2O8P	0
cpd02295[c]	1-4-Dihydroxy-2-naphthoate	C11H7O4	-1
cpd02465[c]	tetrahydrodipicolinate	C7H7NO4	-2
cpd02132[c]	3-Phospho-D-erythronate	C4H7O8P	-2
cpd02645[c]	Phosphoenol-4-deoxy-3-tetrulosonate	C4H5O7P	-2
cpd02826[c]	5'-Phosphoribosylformylglycinamidine	C8H16N3O8P	0
cpd02140[c]	Aminoimidazole ribotide	C8H14N3O7P	0
cpd02893[c]	5'-Phosphoribosyl-4-carboxy-5-aminoimidazole	C9H13N3O9P	-1
cpd02315[c]	6-Pyruvoyltetrahydropterin	C9H11N5O3	0
cpd02678[c]	N-Formyl-GAR	C8H14N2O9P	-1
cpd02724[c]	N-Succinyl-L-2-amino-6-oxopimelate	C11H12NO8	-3
cpd02791[c]	methylthioribulose-1-phosphate	C6H12O7PS	-1
cpd03221[c]	Zymosterol	C27H44O	0
cpd02755[c]	Fecosterol	C28H46O	0
cpd11225[c]	3-4-dihydroxy-2-butanone4-phosphate	C4H8O6P	-1
cpd02835[c]	UDP-2,3-bis(3-hydroxytetradecanoyl)glucosamine	C43H75N3O20P2	-2
cpd02930[c]	2,3-Bis(beta-hydoroxymyristoyl)-beta-D-glucosaminyl 1-phosphate	C34H65NO12P	-1
cpd02991[c]	phosphoribulosylformimino-AICAR-phosphate	C15H23N5O15P2	-2
cpd02851[c]	AICAR	C9H14N4O8P	-1
cpd02921[c]	SAICAR	C13H16N4O12P	-3
cpd02861[c]	UDP-N-acetylmuramoyl-L-alanyl-D-glutamyl-L-lysine	C34H52N7O24P2	-3
cpd02943[c]	UDP-N-acetylmuramoyl-L-alanyl-D-glutamyl-L-lysyl-D-alanyl-D-alanine	C40H62N9O26P2	-3
cpd03490[c]	UDP-N-acetylmuramoyl-L-alanyl-gamma-D-glutamyl-L-lysine	C34H52N7O24P2	-3
cpd02862[c]	UDPMurAc(oyl-L-Ala-D-gamma-Glu-L-Lys-D-Ala-D-Ala)	C40H62N9O26P2	-3
cpd02886[c]	UDP-3-O-(beta-hydroxymyristoyl)-N-acetylglucosamine	C31H51N3O19P2	-2
cpd03584[c]	UDP-3-O-(beta-hydroxymyristoyl)-D-glucosamine	C29H50N3O18P2	-1
cpd02968[c]	UDP-N-acetylmuramoyl-L-alanyl-D-glutamyl-6-carboxy-L-lysyl-D-alanyl- D-alanine	C41H61N9O28P2	-4
cpd03521[c]	Dihydroneopterin phosphate	C9H13N5O7P	-1
cpd00498[c]	2-Aceto-2-hydroxybutanoate	C6H9O4	-1
cpd03897[c]	4a-Hydroxytetrahydrobiopterin	C9H15N5O4	0
cpd03306[c]	3,4-Dihydroxyphenylethyleneglycol	C8H10O4	0
cpd03307[c]	3,4-Dihydroxymandelaldehyde	C8H8O4	0
cpd03414[c]	UroporphyrinogenI	C40H36N4O16	-8
cpd03416[c]	CoproporphyrinogenI	C36H40N4O8	-4
cpd03443[c]	3-Octaprenyl-4-hydroxybenzoate	C47H69O3	-1
cpd03444[c]	2-Octaprenylphenol	C46H70O	0
cpd03486[c]	N-acetylmuramoyl-L-alanyl-D-glutamyl-L-lysyl-D-alanyl-D-alanine-diphosphoundecaprenol	C86H140N7O21P2	-3
cpd03487[c]	Undecaprenyl-diphospho-N-acetylmuramoyl-(N-acetylglucosamine)-L-alanyl-D-glutamyl-L-lysyl-D-alanyl-D-alanine	C94H153N8O26P2	-3
cpd03494[c]	Undecaprenyl-diphospho-N-acetylmuramoyl-L-alanyl-D-glutamyl-meso-2-6-diaminopimeloyl-D-alanyl-D-alanine	C87H139N7O23P2	-4
cpd03529[c]	N4-Acetylaminobutanal	C6H11NO2	0
cpd01889[c]	4-Acetamidobutanoate	C6H10NO3	-1
cpd03530[c]	L-4-Hydroxyglutamatesemialdehyde	C5H9NO4	0
cpd02535[c]	2,3-Dihydroxy-3-methylvalerate	C6H11O4	-1
cpd10162[c]	(R)-3-Hydroxy-3-methyl-2-oxopentanoate	C6H9O4	-1
cpd03760[c]	Precorrin 6B	C44H49N4O16	-7
cpd03835[c]	Precorrin 8	C45H53N4O14	-7
cpd03761[c]	Precorrin 6A	C44H47N4O16	-7
cpd03832[c]	Hydrogenobyrinate	C45H54N4O14	-6
cpd03834[c]	Precorrin 4	C44H45N4O17	-7
cpd03839[c]	Precorrin 5	C45H47N4O17	-7
cpd03916[c]	Adenosyl cobyrinate diamide	C55H69CoN11O15	-3
cpd03918[c]	Adenosyl cobinamide	C58H85CoN16O11	2
cpd03919[c]	Adenosyl cobinamide phosphate	C58H84CoN16O14P	0
cpd03920[c]	Adenosylcobinamide-GDP	C68H96CoN21O21P2	0
cpd03423[c]	alpha-Ribazole	C14H18N2O4	0
cpd03917[c]	Adenosylcobyric acid	C55H77CoN15O11	1
cpd03913[c]	Hydrogenobyrinate diamide	C45H58N6O12	-4
cpd07403[c]	2-(beta-D-Glucosyl)-sn-glycerol 3-phosphate	C9H18O11P	-1
cpd03217[c]	Lycopene	C40H56	0
cpd08211[c]	trans,trans,cis-Geranylgeranyl diphosphate	C20H34O7P2	-2
cpd00286[c]	Undecaprenyl phosphate	C55H90O4P	-1
cpd08286[c]	2-C-methyl-D-erythritol4-phosphate	C5H12O7P	-1
cpd08287[c]	4--cytidine5-diphospho-2-C-methyl-D-erythritol	C14H23N3O14P2	-2
cpd08288[c]	2-phospho-4--cytidine5-diphospho-2-C-methyl-D-erythritol	C14H23N3O17P3	-3
cpd08289[c]	1-deoxy-D-xylulose5-phosphate	C5H10O7P	-1
cpd02948[c]	MurAc(oyl-L-Ala-D-gamma-Glu-L-Lys-D-Ala-D-Ala)-diphospho- undecaprenol	C86H140N7O21P2	-3
cpd03491[c]	Undecaprenyl-diphospho-N-acetylmuramoyl-(N-acetylglucosamine)-L-alanyl-gamma-D-glutamyl-L-lysyl-D-alanyl-D-alanine	C94H153N8O26P2	-3
cpd00272[c]	GDP-L-fucose	C16H23N5O15P2	-2
cpd00523[c]	Trehalose 6-phosphate	C12H21O14P	-2
cpd08358[c]	UDP-6-sulfoquinovose	C15H21N2O19P2S	-3
cpd08632[c]	Divinyl chlorophyllide a	C35H31N4O5Mg	0
cpd01449[c]	Chlorophyllide	C35H33N4O5Mg	0
cpd02547[c]	(R)-1-Aminopropan-2-yl phosphate	C3H10NO4P	0
cpd09410[c]	Demethylphylloquinone	C30H44O2	0
cpd03091[c]	5'-Deoxyadenosine	C10H13N5O3	0
cpd09879[c]	S-(Hydroxymethyl)glutathione	C11H18N3O7S	-1
cpd00759[c]	S-Formylglutathione	C11H16N3O7S	-1
cpd03176[c]	5(S)-HPETE	C20H31O4	-1
cpd02918[c]	5-HETE	C20H31O3	-1
cpd03555[c]	15(S)-HPETE	C20H31O4	-1
cpd02890[c]	15(S)-HETE	C20H31O3	-1
cpd10527[c]	GDP-4-keto-6-L-deoxygalactose	C16H21N5O15P2	-2
cpd11206[c]	Precorrin 1	C41H38N4O16	-8
cpd11217[c]	1,4-Dihydroxy-2-naphthoyl-CoA	C32H39N7O19P3S	-3
cpd03422[c]	Cobinamide	C48H73CoN11O8	3
cpd02039[c]	(R)-1-Amino-2-propanol	C3H10NO	1
cpd03751[c]	Diploptene	C30H50	0
cpd03750[c]	22-Hopanol	C30H52O	0
cpd11465[c]	But-2-enoyl-[acyl-carrier protein]	C15H25N2O8PRS	-1
cpd11464[c]	Butyryl-ACP	C15H27N2O8PRS	-1
cpd11467[c]	(2E)-Tetradecenoyl-[acp]	C25H45N2O8PRS	-1
cpd11466[c]	Tetradecanoyl-[acyl-carrier protein]	C25H47N2O8PRS	-1
cpd11469[c]	(2E)-Dodecenoyl-[acp]	C23H41N2O8PRS	-1
cpd11468[c]	Dodecanoyl-ACP	C23H43N2O8PRS	-1
cpd11471[c]	(2E)-Octenoyl-[acp]	C19H33N2O8PRS	-1
cpd11470[c]	Octanoyl-ACP	C19H35N2O8PRS	-1
cpd11473[c]	(2E)-Hexenoyl-[acp]	C17H29N2O8PRS	-1
cpd11472[c]	Hexanoyl-ACP	C17H31N2O8PRS	-1
cpd11475[c]	(2E)-Decenoyl-[acp]	C21H37N2O8PRS	-1
cpd11474[c]	Decanoyl-ACP	C21H39N2O8PRS	-1
cpd11477[c]	(2E)-Hexadecenoyl-[acp]	C27H49N2O8PRS	-1
cpd11476[c]	hexadecanoyl-acp	C27H51N2O8PRS	-1
cpd11478[c]	(R)-3-Hydroxybutanoyl-[acyl-carrier protein]	C15H27N2O9PRS	-1
cpd11479[c]	D-3-Hydroxyhexanoyl-[acp]	C17H31N2O9PRS	-1
cpd11480[c]	D-3-Hydroxydodecanoyl-[acp]	C23H43N2O9PRS	-1
cpd11481[c]	R-3-hydroxypalmitoyl-acyl-carrierprotein-	C27H51N2O9PRS	-1
cpd11482[c]	(R)-3-Hydroxydecanoyl-[acyl-carrier protein]	C21H39N2O9PRS	-1
cpd11483[c]	(R)-3-Hydroxyoctanoyl-[acyl-carrier protein]	C19H35N2O9PRS	-1
cpd11484[c]	(R)-3-Hydroxytetradecanoyl-[acyl-carrier protein]	C25H47N2O9PRS	-1
cpd11485[c]	3-oxohexadecanoyl-acp	C27H49N2O9PRS	-1
cpd11486[c]	3-Oxohexanoyl-[acp]	C17H29N2O9PRS	-1
cpd11487[c]	3-oxodecanoyl-acp	C21H37N2O9PRS	-1
cpd11488[c]	Acetoacetyl-ACP	C15H25N2O9PRS	-1
cpd11489[c]	3-oxododecanoyl-acp	C23H41N2O9PRS	-1
cpd11490[c]	3-oxooctanoyl-acp	C19H33N2O9PRS	-1
cpd11491[c]	3-oxotetradecanoyl-acp	C25H45N2O9PRS	-1
cpd11492[c]	Malonyl-[acyl-carrier protein]	C14H22N2O10PRS	-2
cpd11494[c]	Acetyl-ACP	C13H23N2O8PRS	-1
cpd01695[c]	Myristoyl-CoA	C35H59N7O17P3S	-3
cpd03847[c]	Tetradecanoate	C14H27O2	-1
cpd11461[c]	DNA	C15H23O13P2R3	-2
cpd12223[c]	DNA 5-methylcytosine	C20H29N3O17P3R2	-3
cpd00075[c]	Nitrite	NO2	-1
cpd11669[c]	Ubiquinone	C19H26O4	0
cpd11665[c]	Ubiquinol	C19H28O4	0
cpd11751[c]	tRNA(Tyr)	C10H12N5O3R	0
cpd12194[c]	L-Tyrosyl-tRNA(Tyr)	C19H22N6O5R	1
cpd11906[c]	tRNA(Ala)	C10H12N5O3R	0
cpd11770[c]	L-Alanyl-tRNA	C13H18N6O4R	1
cpd12005[c]	Lipoylprotein	CHRS2	0
cpd11830[c]	S-Aminomethyldihydrolipoylprotein	C2H7NRS2	1
cpd11907[c]	tRNA(Arg)	C10H12N5O3R	0
cpd12036[c]	L-Arginyl-tRNA	C16H26N9O4R	2
cpd11908[c]	tRNA(Asn)	C10H12N5O3R	0
cpd12829[c]	Asp-tRNA(Asn)	C19H27NO19P2R3	-3
cpd12313[c]	L-Asparaginyl-tRNA(Asn)	C14H19N7O5R	1
cpd11910[c]	tRNA(Cys)	C10H12N5O3R	0
cpd12255[c]	L-Cysteinyl-tRNA(Cys)	C13H18N6O4RS	1
cpd11911[c]	tRNA(Gln)	C10H12N5O3R	0
cpd12828[c]	L-Glutamyl-tRNA(Gln)	C25H33N6O19P2R2	-3
cpd12060[c]	Gln-tRNA(Gln)	C15H21N7O5R	1
cpd11913[c]	tRNA(Gly)	C10H12N5O3R	0
cpd12100[c]	Glycyl-tRNA(Gly)	C12H16N6O4R	1
cpd11914[c]	tRNA(His)	C10H12N5O3R	0
cpd12228[c]	L-Histidyl-tRNA(His)	C16H20N8O4R	1
cpd11915[c]	tRNA(Ile)	C10H12N5O3R	0
cpd12256[c]	L-Isoleucyl-tRNA(Ile)	C16H24N6O4R	1
cpd11916[c]	tRNA(Leu)	C10H12N5O3R	0
cpd12003[c]	L-Leucyl-tRNA	C16H24N6O4R	1
cpd11918[c]	tRNA(Met)	C10H12N5O3R	0
cpd12105[c]	L-Methionyl-tRNA	C15H22N6O4RS	1
cpd11919[c]	tRNA(Phe)	C10H12N5O3R	0
cpd12335[c]	L-Phenylalanyl-tRNA(Phe)	C19H22N6O4R	1
cpd11920[c]	tRNA(Pro)	C10H12N5O3R	0
cpd12164[c]	L-Prolyl-tRNA(Pro)	C15H19N6O4R	0
cpd11921[c]	tRNA(Ser)	C10H12N5O3R	0
cpd12132[c]	L-Seryl-tRNA(Ser)	C13H17N6O5R	0
cpd11922[c]	tRNA(Thr)	C10H12N5O3R	0
cpd12229[c]	L-Threonyl-tRNA(Thr)	C14H19N6O5R	0
cpd11923[c]	tRNA(Trp)	C10H12N5O3R	0
cpd12336[c]	L-Tryptophanyl-tRNA(Trp)	C21H23N7O4R	1
cpd11924[c]	tRNA(Val)	C10H12N5O3R	0
cpd12133[c]	L-Valyl-tRNA(Val)	C15H22N6O4R	1
cpd11940[c]	Hemoglobin	-	0
cpd00204[c]	CO	CHO	1
cpd12850[c]	Globin	noformula	0
cpd11948[c]	tRNA UpsiC	C19H26N2O21P3R2	-3
cpd11947[c]	tRNA TpsiC	C20H28N2O21P3R2	-3
cpd12225[c]	Dihydrolipolprotein	CH3RS2	0
cpd12285[c]	N-Formylmethionyl-tRNA	C16H21N6O5RS	0
cpd12227[c]	L-Glutamyl-tRNA-Glu	C15H19N6O6R	0
cpd11912[c]	tRNA-Glu	C10H12N5O3R	0
cpd12559[c]	N-Acetyl-D-glucosaminyldiphosphodolichol	C33H57NO12P2	-2
cpd12568[c]	Chitobiosyldiphosphodolichol	C41H70N2O17P2	-2
cpd03216[c]	Neurosporene	C40H58	0
cpd11909[c]	tRNA(Asp)	C10H12N5O3R	0
cpd12226[c]	L-Aspartyl-tRNA(Asp)	C14H17N6O6R	0
cpd03427[c]	(3Z)-Phycocyanobilin	C33H36N4O6	-2
cpd14613[c]	2-Methyl-6-phytylquinol	C27H46O2	0
cpd14614[c]	2,3-Dimethyl-5-phytylquinol	C28H48O2	0
cpd14663[c]	(2'S)-Deoxymyxol 2'-(2,4-di-O-methyl-alpha-L-fucoside)	C48H70O6	0
cpd14665[c]	(3R,2'S)-Myxol 2'-(2,4-di-O-methyl-alpha-L-fucoside)	C48H70O7	0
cpd14938[c]	3-Oxostearoyl-[acp]	C18H33O2RS	0
cpd14939[c]	3-Hydroxystearoyl-[acp]	C18H35O2RS	0
cpd14940[c]	(2E)-Octadecenoyl-[acp]	C18H33ORS	0
cpd15366[c]	(R)-3-hydroxy-cis-dodec-5-enoyl-[acyl-carrier protein]	C23H41N2O9PRS	-1
cpd15569[c]	trans-3-cis-5-dodecenoyl-[acyl-carrier protein]	C23H39N2O8PRS	-1
cpd15368[c]	(R)-3-hydroxy-cis-myristol-7-eoyl-[acyl-carrier protein]	C25H45N2O9PRS	-1
cpd15570[c]	trans-3-cis-7-myristoleoyl-[acyl-carrier protein]	C25H43N2O8PRS	-1
cpd15369[c]	(R)-3-hydroxy-cis-palm-9-eoyl-[acyl-carrier protein]	C27H49N2O9PRS	-1
cpd15571[c]	trans-3-cis-9-palmitoleoyl-[acyl-carrier protein]	C27H47N2O8PRS	-1
cpd15370[c]	(R)-3-hydroxy-cis-vacc-11-enoyl-[acyl-carrier protein]	C29H53N2O9PRS	-1
cpd15568[c]	trans-3-cis-11-vacceoyl-[acyl-carrier protein]	C29H51N2O8PRS	-1
cpd15373[c]	3-oxo-cis-dodec-5-enoyl-[acyl-carrier protein]	C23H39N2O9PRS	-1
cpd15374[c]	3-oxo-cis-myristol-7-eoyl-[acyl-carrier protein]	C25H43N2O9PRS	-1
cpd15375[c]	3-oxo-cis-palm-9-eoyl-[acyl-carrier protein]	C27H47N2O9PRS	-1
cpd15376[c]	3-oxo-cis-vacc-11-enoyl-[acyl-carrier protein]	C29H51N2O9PRS	-1
cpd15416[c]	cis-dec-3-enoyl-[acyl-carrier protein]	C21H37N2O8PRS	-1
cpd15415[c]	cis-dodec-5-enoyl-[acyl-carrier protein]	C23H41N2O8PRS	-1
cpd15294[c]	Tetradecenoyl-ACP	C25H45N2O8PRS	-1
cpd15239[c]	Hexadecenoyl-ACP	C27H49N2O8PRS	-1
cpd00029[p]	Acetate	C2H3O2	-1
cpd15325[c]	1-dodecanoyl-sn-glycerol 3-phosphate	C15H30O7P	-1
cpd15521[c]	1,2-didodecanoyl-sn-glycerol 3-phosphate	C27H52O8P	-1
cpd15331[c]	1-tetradecanoyl-sn-glycerol 3-phosphate	C17H34O7P	-1
cpd15522[c]	1,2-ditetradecanoyl-sn-glycerol 3-phosphate	C31H60O8P	-1
cpd15330[c]	1-tetradec-7-enoyl-sn-glycerol 3-phosphate	C17H32O7P	-1
cpd15523[c]	1,2-ditetradec-7-enoyl-sn-glycerol 3-phosphate	C31H56O8P	-1
cpd15327[c]	1-hexadecanoyl-sn-glycerol 3-phosphate	C19H38O7P	-1
cpd15524[c]	1,2-dihexadecanoyl-sn-glycerol 3-phosphate	C35H68O8P	-1
cpd15326[c]	1-hexadec-9-enoyl-sn-glycerol 3-phosphate	C19H36O7P	-1
cpd15525[c]	1,2-dihexadec-9-enoyl-sn-glycerol 3-phosphate	C35H64O8P	-1
cpd15329[c]	1-octadecanoyl-sn-glycerol 3-phosphate	C21H42O7P	-1
cpd15526[c]	1,2-dioctadecanoyl-sn-glycerol 3-phosphate	C39H76O8P	-1
cpd15328[c]	1-octadec-11-enoyl-sn-glycerol 3-phosphate	C21H40O7P	-1
cpd15527[c]	1,2-dioctadec-11-enoyl-sn-glycerol 3-phosphate	C39H72O8P	-1
cpd00035[p]	L-Alanine	C3H7NO2	0
cpd00371[c]	Propanal	C3H6O	0
cpd01262[c]	Amylotriose	C18H32O16	0
cpd01399[c]	Maltotetraose	C24H42O21	0
cpd15495[c]	Maltopentaose	C30H52O26	0
cpd01329[c]	Maltohexaose	C36H62O31	0
cpd15494[c]	Maltoheptaose	C42H72O36	0
cpd00051[p]	L-Arginine	C6H15N4O2	1
cpd01048[c]	Arsenate	HO4As	-2
cpd04098[c]	Arsenite	AsH2O3	-1
cpd00074[c]	Sulfur	S	0
cpd00104[c]	Biotin	C10H15N2O3S	-1
cpd00063[p]	Ca2+	Ca	2
cpd00635[c]	Cbl	C62H89CoN13O14P	0
cpd15418[c]	CDP-1,2-dihexadec-9-enoylglycerol	C44H75N3O15P2	-2
cpd15420[c]	CDP-1,2-dioctadec-11-enoylglycerol	C48H83N3O15P2	-2
cpd01015[p]	Cyanate	CNO	-1
cpd15306[c]	1,2-Diacyl-sn-glycerol didodecanoyl	C27H52O5	0
cpd15417[c]	CDP-1,2-didodecanoylglycerol	C36H63N3O15P2	-2
cpd15423[c]	CDP-1,2-ditetradecanoylglycerol	C40H71N3O15P2	-2
cpd15422[c]	CDP-1,2-ditetradec-7-enoylglycerol	C40H67N3O15P2	-2
cpd15419[c]	CDP-1,2-dihexadecanoylglycerol	C44H79N3O15P2	-2
cpd15421[c]	CDP-1,2-dioctadecanoylglycerol	C48H87N3O15P2	-2
cpd10515[p]	Fe2+	Fe	2
cpd10516[p]	Fe3+	Fe	3
cpd00053[p]	L-Glutamine	C5H10N2O3	0
cpd00023[p]	L-Glutamate	C5H8NO4	-1
cpd00033[e]	Glycine	C2H5NO2	0
cpd11640[p]	H2	H2	0
cpd00119[p]	L-Histidine	C6H9N3O2	0
cpd14935[c]	3-Oxostearoyl-CoA	C39H65N7O18P3S	-3
cpd00107[p]	L-Leucine	C6H13NO2	0
cpd00039[p]	L-Lysine	C6H15N2O2	1
cpd11917[c]	tRNA(Lys)	C10H12N5O3R	0
cpd15249[c]	L-Lysine-tRNA (Lys)	C16H26N7O4R	2
cpd15511[c]	two linked disacharide pentapeptide murein units (uncrosslinked, middle of chain)	C80H124N16O42	-4
cpd15510[c]	two linked disacharide pentapeptide and tetrapeptide murein units (uncrosslinked, middle of chain)	C77H119N15O41	-4
cpd15505[c]	two linked disacharide tetrapeptide murein units (uncrosslinked, middle of chain)	C74H114N14O40	-4
cpd15509[c]	two linked disacharide pentapeptide and tripeptide murein units (uncrosslinked, middle of chain)	C74H114N14O40	-4
cpd15504[c]	two linked disacharide tetrapeptide and tripeptide murein units (uncrosslinked, middle of chain)	C71H109N13O39	-4
cpd00030[p]	Mn2+	Mn	2
cpd11574[p]	Molybdate	H2MoO4	0
cpd03607[c]	4-(Phosphonooxy)-threonine	C4H9NO7P	-1
cpd15545[c]	Phosphatidylglycerophosphate dihexadecanoyl	C38H74O13P2	-2
cpd15546[c]	Phosphatidylglycerophosphate dihexadec-9-enoyl	C38H70O13P2	-2
cpd15547[c]	Phosphatidylglycerophosphate dioctadecanoyl	C42H82O13P2	-2
cpd15548[c]	Phosphatidylglycerophosphate dioctadec-11-enoyl	C42H78O13P2	-2
cpd15542[c]	Phosphatidylglycerophosphate didodecanoyl	C30H58O13P2	-2
cpd15543[c]	Phosphatidylglycerophosphate ditetradecanoyl	C34H66O13P2	-2
cpd15544[c]	Phosphatidylglycerophosphate ditetradec-7-enoyl	C34H62O13P2	-2
cpd00009[p]	Phosphate	HO4P	-2
cpd00129[p]	L-Proline	C5H8NO2	-1
cpd00118[p]	Putrescine	C4H14N2	2
cpd00054[p]	L-Serine	C3H7NO3	0
cpd00048[p]	Sulfate	O4S	-2
cpd00264[p]	Spermidine	C7H22N3	3
cpd00036[p]	Succinate	C4H4O4	-2
cpd00076[p]	Sucrose	C12H22O11	0
cpd15378[c]	4-Hydroxy-benzylalcohol	C7H8O2	0
cpd00073[p]	Urea	CH4N2O	0
cpd00034[p]	Zn2+	Zn	2
cpd11735[c]	Amylose	C30H52O26	0
cpd03846[c]	octanoate	C8H15O2	-1
cpd01335[c]	Octanoyl-CoA	C29H47N7O17P3S	-3
cpd15240[c]	hexacosanoate	C26H51O2	-1
cpd15241[c]	Hexacosanoyl-CoA	C47H83N7O17P3S	-3
cpd05235[c]	tetracosanoate	C24H47O2	-1
cpd15297[c]	Lignoceroyl-CoA	C45H79N7O17P3S	-3
cpd15270[c]	octadecynoate	C18H31O2	-1
cpd15272[c]	Octadecynoyl-CoA	C39H63N7O17P3S	-3
cpd15269[c]	octadecenoate	C18H33O2	-1
cpd15274[c]	Octadecenoyl-CoA	C39H65N7O17P3S	-3
cpd01080[c]	octadecanoate (n-C18:0)	C18H35O2	-1
cpd00327[c]	Stearyl-CoA	C39H67N7O17P3S	-3
cpd15237[c]	hexadecenoate	C16H29O2	-1
cpd15238[c]	Hexadecenoyl-CoA	C37H61N7O17P3S	-3
cpd15298[c]	tetradecenoate	C14H25O2	-1
cpd15295[c]	Tetradecenoyl-CoA	C35H57N7O17P3S	-3
cpd01741[c]	Dodecanoate (n-C12:0)	C12H23O2	-1
cpd01260[c]	Lauroyl-CoA	C33H55N7O17P3S	-3
cpd01107[c]	Decanoate	C10H19O2	-1
cpd03128[c]	Decanoyl-CoA	C31H51N7O17P3S	-3
cpd00175[c]	UDP-N-acetyl-D-galactosamine	C17H25N3O17P2	-2
cpd15217[c]	S-aminomethyldihydrolipoamide	C9H21N2OS2	1
cpd00419[c]	Pyridoxamine	C8H13N2O2	1
cpd01587[c]	5-Methylcytosine	C5H7N3O	0
cpd00086[c]	Propionyl-CoA	C24H37N7O17P3S	-3
cpd00939[c]	Toxopyrimidine	C6H9N3O	0
cpd15677[c]	1,2-diisoheptadecanoyl-sn-glycerol 3-phosphate	C37H72O8P	-1
cpd15683[c]	CDP-1,2-diisoheptadecanoylglycerol	C46H83N3O15P2	-2
cpd15678[c]	1,2-dianteisoheptadecanoyl-sn-glycerol 3-phosphate	C37H72O8P	-1
cpd15684[c]	CDP-1,2-dianteisoheptadecanoylglycerol	C46H83N3O15P2	-2
cpd15679[c]	1,2-diisotetradecanoyl-sn-glycerol 3-phosphate	C31H60O8P	-1
cpd15685[c]	CDP-1,2-diisotetradecanoylglycerol	C40H71N3O15P2	-2
cpd15680[c]	1,2-diisopentadecanoyl-sn-glycerol 3-phosphate	C33H64O8P	-1
cpd15686[c]	CDP-1,2-diisopentadecanoylglycerol	C42H75N3O15P2	-2
cpd15681[c]	1,2-dianteisopentadecanoyl-sn-glycerol 3-phosphate	C33H64O8P	-1
cpd15687[c]	CDP-1,2-dianteisopentadecanoylglycerol	C42H75N3O15P2	-2
cpd15682[c]	1,2-diisohexadecanoyl-sn-glycerol 3-phosphate	C35H68O8P	-1
cpd15688[c]	CDP-1,2-diisohexadecanoylglycerol	C44H79N3O15P2	-2
cpd15716[c]	Diisoheptadecanoylphosphatidylglycerophosphate	C40H78O13P2	-2
cpd15717[c]	Dianteisoheptadecanoylphosphatidylglycerophosphate	C40H78O13P2	-2
cpd15718[c]	Diisotetradecanoylphosphatidylglycerophosphate	C34H66O13P2	-2
cpd15719[c]	Diisopentadecanoylphosphatidylglycerophosphate	C36H70O13P2	-2
cpd15720[c]	Dianteisopentadecanoylphosphatidylglycerophosphate	C36H70O13P2	-2
cpd15721[c]	Diisohexadecanoylphosphatidylglycerophosphate	C38H74O13P2	-2
cpd00058[l]	Cu2+	Cu	2
cpd16335[c]	2-Succinyl-5-enolpyruvyl-6-hydroxy-3-cyclohexene-1-carboxylate	C14H13O9	-3
cpd00415[c]	Quinol	C6H6O2	0
cpd00364[c]	Chinone	C6H4O2	0
cpd12265[c]	Oxidized plastocyanin	noformula	2
cpd16503[c]	Plastoquinol-9	C53H82O2	0
cpd07274[c]	Plastoquinone 9	C53H80O2	0
cpd12239[c]	Reduced plastocyanin	noformula	1
cpd16757[c]	(R)-Hydroxyhexanoyl-CoA	C27H42N7O18P3S	-4
cpd02506[c]	5-Amino-4-imidazolecarboxyamide	C4H6N4O	0
cpd08928[c]	L-Threonine phosphate	C4H9NO6P	-1
cpd01174[p]	Glyceollin	C20H18O5	0
cpd01174[c]	Glyceollin	C20H18O5	0
cyanophy[c]	cyanophycin	-	-
argLaspL[c]	L-arginine-L-aspartate monomer of cyanophycin	-	-
cpdR-D-D[c]	Cyanophycin monomer with aspartate	-	-
cpd01855[c]	Xylitol 5-phosphate	C5H12O8P	-1
cpd01264[c]	Octadecanal	C18H36O	0
cpd01250[c]	Heptadecane	C17H36	0
cpd01250[e]	Heptadecane	C17H36	0
cpd02234[e]	(R)-3-Hydroxybutanoyl-CoA	C25H39N7O18P3S	-3
cpd01270[c]	FMNH2	C17H22N4O9P	-1
dialurate[c]	Dialurate	C4H4N2O4	0
cpd01997[c]	Dimethylbenzimidazole	C9H10N2	0
cpd00218[c]	Niacin	C6H4NO2	-1
cpd02904[c]	alpha-Ribazole 5'-phosphate	C14H18N2O7P	-1
cpd00999[c]	Phytol	C20H40O	0

## Sheet: TPM1
Reaction ID	CycleSyn Reaction ID	Reaction Name	EC number	GPR	Reaction Description	Reaction	Pathway	Reference
NO3abcpp	NO3abcpp_tpm1	Nitrate transport via ABC system (periplasm)		(sll1450 and sll1452 and sll1453)	(1) ATP[c][tpm1] + (1) H2O[c][tpm1] + (1) Nitrate[p][tpm1] --> (1) ADP[c][tpm1] + (1) H+[c][tpm1] + (1) Phosphate[c][tpm1] + (1) Nitrate[c][tpm1]	(1) cpd00002[c][tpm1] + (1) cpd00001[c][tpm1] + (1) cpd00209[p][tpm1] --> (1) cpd00008[c][tpm1] + (1) cpd00067[c][tpm1] + (1) cpd00009[c][tpm1] + (1) cpd00209[c][tpm1]	Transport
rxn04704	rxn04704_tpm1	coproporphyrinogen-III:S-adenosyl-L-methionine	1.3.99.22	(sll1917) or (sll1876)	(2) S-Adenosyl-L-methionine[c][tpm1] + (1) Coproporphyrinogen III[c][tpm1] --> (2) CO2[c][tpm1] + (2) L-Methionine[c][tpm1] + (1) ProtoporphyrinogenIX[c][tpm1] + (2) 5'-Deoxyadenosine[c][tpm1]	(2) cpd00017[c][tpm1] + (1) cpd02083[c][tpm1] --> (2) cpd00011[c][tpm1] + (2) cpd00060[c][tpm1] + (1) cpd00791[c][tpm1] + (2) cpd03091[c][tpm1]	Porphyrin and chlorophyll metabolism
rxn00405	rxn00405_tpm1	L-Arginine carboxy-lyase	4.1.1.19	(slr0662 or slr1312)	(1) L-Arginine[c][tpm1] + (1) H+[c][tpm1] --> (1) CO2[c][tpm1] + (1) Agmatine[c][tpm1]	(1) cpd00051[c][tpm1] + (1) cpd00067[c][tpm1] --> (1) cpd00011[c][tpm1] + (1) cpd00152[c][tpm1]	Urea cycle and metabolism of amino groups
rxn08151	rxn08151_tpm1	L-arginine transport via ABC system (periplasm)		(slr1735 and sll1270)	(1) H2O[c][tpm1] + (1) ATP[c][tpm1] + (1) L-Arginine[p][tpm1] --> (1) ADP[c][tpm1] + (1) Phosphate[c][tpm1] + (1) L-Arginine[c][tpm1] + (1) H+[c][tpm1]	(1) cpd00001[c][tpm1] + (1) cpd00002[c][tpm1] + (1) cpd00051[p][tpm1] --> (1) cpd00008[c][tpm1] + (1) cpd00009[c][tpm1] + (1) cpd00051[c][tpm1] + (1) cpd00067[c][tpm1]	Transport
rxn08853	rxn08853_tpm1	L-lysine transport via ABC system (periplasm)		(slr1735 and sll1270)	(1) H2O[c][tpm1] + (1) ATP[c][tpm1] + (1) L-Lysine[p][tpm1] --> (1) ADP[c][tpm1] + (1) Phosphate[c][tpm1] + (1) L-Lysine[c][tpm1] + (1) H+[c][tpm1]	(1) cpd00001[c][tpm1] + (1) cpd00002[c][tpm1] + (1) cpd00039[p][tpm1] --> (1) cpd00008[c][tpm1] + (1) cpd00009[c][tpm1] + (1) cpd00039[c][tpm1] + (1) cpd00067[c][tpm1]	Transport
rxn03904	rxn03904_tpm1	UDPMurAc(oyl-L-Ala-D-gamma-Glu-L-Lys-D-Ala-D-Ala):undecaprenyl-	2.7.8.13	sll0657	(1) Undecaprenyl phosphate[c][tpm1] + (1) UDP-N-acetylmuramoyl-L-alanyl-D-glutamyl-6-carboxy-L-lysyl-D-alanyl- D-alanine[c][tpm1] --> (1) UMP[c][tpm1] + (1) Undecaprenyl-diphospho-N-acetylmuramoyl-L-alanyl-D-glutamyl-meso-2-6-diaminopimeloyl-D-alanyl-D-alanine[c][tpm1]	(1) cpd00286[c][tpm1] + (1) cpd02968[c][tpm1] --> (1) cpd00091[c][tpm1] + (1) cpd03494[c][tpm1]	Peptidoglycan biosynthesis
rxn01211	rxn01211_tpm1	5,10-Methenyltetrahydrofolate 5-hydrolase(decyclizing)	3.5.4.9	sll0753	(1) H2O[c][tpm1] + (1) 5-10-Methenyltetrahydrofolate[c][tpm1] <=> (1) H+[c][tpm1] + (1) 10-Formyltetrahydrofolate[c][tpm1]	(1) cpd00001[c][tpm1] + (1) cpd00347[c][tpm1] <=> (1) cpd00067[c][tpm1] + (1) cpd00201[c][tpm1]	Glyoxylate and dicarboxylate metabolism, One carbon pool by folate
rxn08934	rxn08934_tpm1	Maltodextrin glucosidase (maltopentaose)	Undetermined	sll1356 or slr1367	(1) H2O[c][tpm1] + (1) Maltopentaose[c][tpm1] --> (1) D-Glucose[c][tpm1] + (1) Maltotetraose[c][tpm1]	(1) cpd00001[c][tpm1] + (1) cpd15495[c][tpm1] --> (1) cpd00027[c][tpm1] + (1) cpd01399[c][tpm1]	Starch and sucrose metabolism
BCAROHX	BCAROHX_tpm1	beta-carotene hydroxylase		sll1468	(1) H+[c][tpm1] + (1) O2[c][tpm1] + (1) NADPH[c][tpm1] + (1) beta-Carotene[c][tpm1] --> (1) H2O[c][tpm1] + (1) NADP[c][tpm1] + (1) beta-Cryptoxanthin[c][tpm1]	(1) cpd00067[c][tpm1] + (1) cpd00007[c][tpm1] + (1) cpd00005[c][tpm1] + (1) cpd01420[c][tpm1] --> (1) cpd00001[c][tpm1] + (1) cpd00006[c][tpm1] + (1) cpd05498[c][tpm1]	Carotenoid biosynthesis - General
BCAROHX2	BCAROHX2_tpm1	beta-carotene hydroxylase		sll1468	(1) H+[c][tpm1] + (1) O2[c][tpm1] + (1) NADPH[c][tpm1] + (1) beta-Cryptoxanthin[c][tpm1] --> (1) H2O[c][tpm1] + (1) NADP[c][tpm1] + (1) Zeaxanthin[c][tpm1]	(1) cpd00067[c][tpm1] + (1) cpd00007[c][tpm1] + (1) cpd00005[c][tpm1] + (1) cpd05498[c][tpm1] --> (1) cpd00001[c][tpm1] + (1) cpd00006[c][tpm1] + (1) cpd03637[c][tpm1]	Carotenoid biosynthesis - General
rxn06887	rxn06887_tpm1	Hydrogenobyrinate <=> Hydrogenobyrinate a,c diamide		sll1501	(2) H2O[c][tpm1] + (2) ATP[c][tpm1] + (2) L-Glutamine[c][tpm1] + (1) Hydrogenobyrinate[c][tpm1] --> (2) ADP[c][tpm1] + (2) Phosphate[c][tpm1] + (2) L-Glutamate[c][tpm1] + (2) H+[c][tpm1] + (1) Hydrogenobyrinate diamide[c][tpm1]	(2) cpd00001[c][tpm1] + (2) cpd00002[c][tpm1] + (2) cpd00053[c][tpm1] + (1) cpd03832[c][tpm1] --> (2) cpd00008[c][tpm1] + (2) cpd00009[c][tpm1] + (2) cpd00023[c][tpm1] + (2) cpd00067[c][tpm1] + (1) cpd03913[c][tpm1]	Porphyrin and chlorophyll metabolism
NDH1_1p	NDH1_1p_tpm1	NAD(P)H dehydrogenase (plastoquinone-8 & 3 protons) (periplasm)	1.6.5.3	( (slr0331 or slr1291) and slr0844 and sll0519 and sll0223 and slr1279 and sll0522 and sll0521 and slr0261 and sll0520 and slr1281 and (slr1280 or sll8031) and slr1623 and sll1262 and sll1220 and sll1221 and sll1223 )	(4) H+[c][tpm1] + (1) NADPH[c][tpm1] + (1) Plastoquinone 9[p][tpm1] --> (1) NADP[c][tpm1] + (3) H+[p][tpm1] + (1) Plastoquinol-9[p][tpm1]	(4) cpd00067[c][tpm1] + (1) cpd00005[c][tpm1] + (1) cpd07274[p][tpm1] --> (1) cpd00006[c][tpm1] + (3) cpd00067[p][tpm1] + (1) cpd16503[p][tpm1]	Oxidative Phosphorylation
NDH1_1u	NDH1_1u_tpm1	NAD(P)H dehydrogenase (plastoquinone-8 & 3 protons) (tilacoide)	1.6.5.3	( (slr0331 or slr1291) and slr0844 and sll0519 and sll0223 and slr1279 and sll0522 and sll0521 and slr0261 and sll0520 and slr1281 and (slr1280 or sll8031) and slr1623 and sll1262 and sll1220 and sll1221 and sll1223 )	(4) H+[c][tpm1] + (1) NADPH[c][tpm1] + (1) Plastoquinone 9[l][tpm1] --> (1) NADP[c][tpm1] + (3) H+[l][tpm1] + (1) Plastoquinol-9[l][tpm1]	(4) cpd00067[c][tpm1] + (1) cpd00005[c][tpm1] + (1) cpd07274[l][tpm1] --> (1) cpd00006[c][tpm1] + (3) cpd00067[l][tpm1] + (1) cpd16503[l][tpm1]	Oxidative Phosphorylation
NDH1_2p	NDH1_2p_tpm1	NAD(P)H dehydrogenase (plastoquinone-8 & 3 protons) (periplasm)	1.6.5.3	( (slr0331 or slr1291) and slr0844 and sll0519 and sll0223 and slr1279 and sll0522 and sll0521 and slr0261 and sll0520 and slr1281 and (slr1280 or sll8031) and slr1623 and sll1262 and sll1220 and sll1221 and sll1223 )	(4) H+[c][tpm1] + (1) NADH[c][tpm1] + (1) Plastoquinone 9[p][tpm1] --> (1) NAD[c][tpm1] + (3) H+[p][tpm1] + (1) Plastoquinol-9[p][tpm1]	(4) cpd00067[c][tpm1] + (1) cpd00004[c][tpm1] + (1) cpd07274[p][tpm1] --> (1) cpd00003[c][tpm1] + (3) cpd00067[p][tpm1] + (1) cpd16503[p][tpm1]	Oxidative Phosphorylation
NDH1_2u	NDH1_2u_tpm1	NAD(P)H dehydrogenase (plastoquinone-8 & 3 protons) (tilacoide)	1.6.5.3	( (slr0331 or slr1291) and slr0844 and sll0519 and sll0223 and slr1279 and sll0522 and sll0521 and slr0261 and sll0520 and slr1281 and (slr1280 or sll8031) and slr1623 and sll1262 and sll1220 and sll1221 and sll1223 )	(4) H+[c][tpm1] + (1) NADH[c][tpm1] + (1) Plastoquinone 9[l][tpm1] --> (1) NAD[c][tpm1] + (3) H+[l][tpm1] + (1) Plastoquinol-9[l][tpm1]	(4) cpd00067[c][tpm1] + (1) cpd00004[c][tpm1] + (1) cpd07274[l][tpm1] --> (1) cpd00003[c][tpm1] + (3) cpd00067[l][tpm1] + (1) cpd16503[l][tpm1]	Oxidative Phosphorylation
rxn00333	rxn00333_tpm1	(S)-2-Hydroxy-acid:oxygen 2-oxidoreductase	1.1.3.15	((sll0404 or slr0806) and sll1189 and sll1831)	(1) O2[c][tpm1] + (1) Glycolate[c][tpm1] --> (1) H2O2[c][tpm1] + (1) Glyoxalate[c][tpm1]	(1) cpd00007[c][tpm1] + (1) cpd00139[c][tpm1] --> (1) cpd00025[c][tpm1] + (1) cpd00040[c][tpm1]	Glyoxylate and dicarboxylate metabolism
rxn11933	rxn11933_tpm1	Glycolate oxidase (nadh)	1.1.99.14	((sll0404 or slr0806) and sll1189 and sll1831)	(1) NAD[c][tpm1] + (1) Glycolate[c][tpm1] --> (1) H+[c][tpm1] + (1) NADH[c][tpm1] + (1) Glyoxalate[c][tpm1]	(1) cpd00003[c][tpm1] + (1) cpd00139[c][tpm1] --> (1) cpd00067[c][tpm1] + (1) cpd00004[c][tpm1] + (1) cpd00040[c][tpm1]	Glyoxylate and dicarboxylate metabolism
rxn00011	rxn00011_tpm1	pyruvate:thiamin diphosphate acetaldehydetransferase	1.2.4.1 or 2.2.1.6	((sll1721 and slr1934) or (sll0065))	(1) Pyruvate[c][tpm1] + (1) TPP[c][tpm1] + (1) H+[c][tpm1] --> (1) CO2[c][tpm1] + (1) 2-Hydroxyethyl-ThPP[c][tpm1]	(1) cpd00020[c][tpm1] + (1) cpd00056[c][tpm1] + (1) cpd00067[c][tpm1] --> (1) cpd00011[c][tpm1] + (1) cpd03049[c][tpm1]	Pyruvate Metabolism
PSII	PSII_tpm1	photosystem II		((sll1867 or slr1181 or slr1311) and slr0906 and sll0851 and ssr3451 and smr0006 and ssl2598 and sml0001 and smr0008 and sml0005 and smr0007 and sml0003 and smr0009 and sll1418 and slr1739 and sml0007 and (slr0927 or sll0849) and (sll0427 or Unknown_gene) and (sll1194 or Unknown_gene) and (sll0258 or Unknown_gene) and (sll1398 or Unknown_gene) and (sml0002 or Unknown_gene) and (slr1645 or Unknown…	(2) H+[c][tpm1] + (1) Plastoquinone 9[l][tpm1] + (1) H2O[l][tpm1] + (2) Photosystem 2 photon[c][tpm1] --> (2) H+[l][tpm1] + (1) Plastoquinol-9[l][tpm1] + (0.5) O2[l][tpm1]	(2) cpd00067[c][tpm1] + (1) cpd07274[l][tpm1] + (1) cpd00001[l][tpm1] + (2) hvphoton2[c][tpm1] --> (2) cpd00067[l][tpm1] + (1) cpd16503[l][tpm1] + (0.5) cpd00007[l][tpm1]	Photosynthesis
rxn00726	rxn00726_tpm1	Chorismate pyruvate-lyase (amino-accepting)	4.1.3.27	((slr0738 or slr1979) and slr0055)	(1) NH3[c][tpm1] + (1) Chorismate[c][tpm1] --> (1) H2O[c][tpm1] + (1) Pyruvate[c][tpm1] + (1) H+[c][tpm1] + (1) Anthranilate[c][tpm1]	(1) cpd00013[c][tpm1] + (1) cpd00216[c][tpm1] --> (1) cpd00001[c][tpm1] + (1) cpd00020[c][tpm1] + (1) cpd00067[c][tpm1] + (1) cpd00093[c][tpm1]	Phenylalanine,tyrosine and tryptophan biosynthesis
rxn00727	rxn00727_tpm1	Chorismate pyruvate-lyase (amino-accepting)	4.1.3.27	((slr0738 or slr1979) and slr0055)	(1) L-Glutamine[c][tpm1] + (1) Chorismate[c][tpm1] --> (1) Pyruvate[c][tpm1] + (1) L-Glutamate[c][tpm1] + (1) H+[c][tpm1] + (1) Anthranilate[c][tpm1]	(1) cpd00053[c][tpm1] + (1) cpd00216[c][tpm1] --> (1) cpd00020[c][tpm1] + (1) cpd00023[c][tpm1] + (1) cpd00067[c][tpm1] + (1) cpd00093[c][tpm1]	Phenylalanine,tyrosine and tryptophan biosynthesis
rxn04159	rxn04159_tpm1	chlorophyllide-a:NADP+ oxidoreductase	1.3.1.75	((slr0749 and slr0750 and slr0772) or slr0506)	(1) NADPH[c][tpm1] + (1) H+[c][tpm1] + (1) Divinyl chlorophyllide a[c][tpm1] --> (1) NADP[c][tpm1] + (1) Chlorophyllide[c][tpm1]	(1) cpd00005[c][tpm1] + (1) cpd00067[c][tpm1] + (1) cpd08632[c][tpm1] --> (1) cpd00006[c][tpm1] + (1) cpd01449[c][tpm1]	Porphyrin and chlorophyll metabolism
rxn03087	rxn03087_tpm1	N-Succinyl-L-2,6-diaminoheptanedioate:2-ocoglytarate	2.6.1.17	(sll0006) or (sll0938)	(1) 2-Oxoglutarate[c][tpm1] + (1) N-Succinyl-L-2,6-diaminopimelate[c][tpm1] <=> (1) L-Glutamate[c][tpm1] + (1) N-Succinyl-L-2-amino-6-oxopimelate[c][tpm1]	(1) cpd00024[c][tpm1] + (1) cpd02698[c][tpm1] <=> (1) cpd00023[c][tpm1] + (1) cpd02724[c][tpm1]	Lysine biosynthesis
NH3tpp	NH3tpp_tpm1	Ammonia (ireversible) transport pp		(sll0108 or sll0537 or sll1017)	(1) H+[p][tpm1] + (1) NH3[p][tpm1] --> (1) H+[c][tpm1] + (1) NH3[c][tpm1]	(1) cpd00067[p][tpm1] + (1) cpd00013[p][tpm1] --> (1) cpd00067[c][tpm1] + (1) cpd00013[c][tpm1]	Transport
rxn08987	rxn08987_tpm1	ammonia ireversible transport (periplasm)		(sll0108) or (sll0537) or (sll1017)	(1) H+[p][tpm1] + (1) NH3[p][tpm1] --> (1) H+[c][tpm1] + (1) NH3[c][tpm1]	(1) cpd00067[p][tpm1] + (1) cpd00013[p][tpm1] --> (1) cpd00067[c][tpm1] + (1) cpd00013[c][tpm1]	Transport
rxn01675	rxn01675_tpm1	dTTP:alpha-D-glucose-1-phosphate thymidylyltransferase	2.7.7.24	(sll0207 or slr0983)	(1) D-Glucose 1-phosphate[c][tpm1] + (1) TTP[c][tpm1] --> (1) PPi[c][tpm1] + (1) dTDPglucose[c][tpm1]	(1) cpd00089[c][tpm1] + (1) cpd00357[c][tpm1] --> (1) cpd00012[c][tpm1] + (1) cpd00626[c][tpm1]	Streptomycin biosynthesis, Nucleotide sugars metabolism, Polyketide sugar unit biosynthesis
rxn00214	rxn00214_tpm1	UDPglucose 4-epimerase	5.1.3.2	(sll0244 or slr1067 or slr1078)	(1) UDP-glucose[c][tpm1] <=> (1) UDP-galactose[c][tpm1]	(1) cpd00026[c][tpm1] <=> (1) cpd00043[c][tpm1]	Galactose metabolism, Nucleotide sugars metabolism
rxn02373	rxn02373_tpm1	L-Glutamate-5-semialdehyde:NADP+ 5-oxidoreductase (phosphorylationg)	1.2.1.41	(sll0373) or (sll0461)	(1) NADP[c][tpm1] + (1) Phosphate[c][tpm1] + (1) L-Glutamate5-semialdehyde[c][tpm1] --> (1) NADPH[c][tpm1] + (1) L-Glutamyl 5-phosphate[c][tpm1]	(1) cpd00006[c][tpm1] + (1) cpd00009[c][tpm1] + (1) cpd00858[c][tpm1] --> (1) cpd00005[c][tpm1] + (1) cpd02097[c][tpm1]	Urea cycle and metabolism of amino groups
COBALT2abcpp_syn	COBALT2abcpp_syn_tpm1	Cobalt (Co+2) ABC transporter (periplasm)		(sll0383 and sll0384 and sll0385)	(1) ATP[c][tpm1] + (1) H2O[c][tpm1] + (1) Co2+[p][tpm1] --> (1) ADP[c][tpm1] + (1) H+[c][tpm1] + (1) Phosphate[c][tpm1] + (1) Co2+[c][tpm1]	(1) cpd00002[c][tpm1] + (1) cpd00001[c][tpm1] + (1) cpd00149[p][tpm1] --> (1) cpd00008[c][tpm1] + (1) cpd00067[c][tpm1] + (1) cpd00009[c][tpm1] + (1) cpd00149[c][tpm1]	Transport
NIabc	NIabc_tpm1	Nickle (Ni+2) ABC transporter (periplasm)		(sll0383 and sll0384 and sll0385)	(1) ATP[c][tpm1] + (1) H2O[c][tpm1] + (1) Ni2+[p][tpm1] --> (1) ADP[c][tpm1] + (1) H+[c][tpm1] + (1) Phosphate[c][tpm1] + (1) Ni2+[c][tpm1]	(1) cpd00002[c][tpm1] + (1) cpd00001[c][tpm1] + (1) cpd00244[p][tpm1] --> (1) cpd00008[c][tpm1] + (1) cpd00067[c][tpm1] + (1) cpd00009[c][tpm1] + (1) cpd00244[c][tpm1]	Transport
rxn00493	rxn00493_tpm1	L-Phenylalanine:2-oxoglutarate aminotransferase	2.6.1.58	(sll0402 or sll0480 or slr0036 or sll1713 or sll1958)	(1) 2-Oxoglutarate[c][tpm1] + (1) L-Phenylalanine[c][tpm1] <=> (1) L-Glutamate[c][tpm1] + (1) Phenylpyruvate[c][tpm1]	(1) cpd00024[c][tpm1] + (1) cpd00066[c][tpm1] <=> (1) cpd00023[c][tpm1] + (1) cpd00143[c][tpm1]	Phenylalanine,tyrosine and tryptophan biosynthesis, Phenylalanine metabolism
[truncated: 1,137 more rows]

## Sheet: TPM2
Reaction ID	CycleSyn Reaction ID	Reaction Name	EC number	GPR	Reaction Description	Reaction	Pathway	Reference
[truncated: 1,168 more rows]

## Sheet: TPM3
Reaction ID	CycleSyn Reaction ID	Reaction Name	EC number	GPR	Reaction Description	Reaction	Pathway	Reference
[truncated: 1,168 more rows]

## Sheet: TPM4
Reaction ID	CycleSyn Reaction ID	Reaction Name	EC number	GPR	Reaction Description	Reaction	Pathway	Reference
[truncated: 1,168 more rows]

[truncated: 9 more sheets: TPM5, TPM6, TPM7, TPM8, TPM9, TPM10, TPM11, TPM12, Transfer Reactions]
