# Supplementary material for: A diurnal flux balance model of Synechocystis sp. PCC 6803 metabolism
Source: PLoS Comput Biol. 2019 Jan 24;15(1):e1006692. doi: 10.1371/journal.pcbi.1006692 (PMC6364703; doi:10.1371/journal.pcbi.1006692)
Supplement: S6 Table — (XLSX) [file pcbi.1006692.s006.xlsx]

## Sheet: AllTransferMetabs_aa
	Metabolite Transfer Flux (mmol gDW-1 hr-1)
	TPM 1 → TPM 2		TPM 2 → TPM 3		TPM 3 → TPM 4		TPM 4 → TPM 5		TPM 5 → TPM 6		TPM 6 → TPM 7		TPM 7 → TPM 8		TPM 8 → TPM 9		TPM 9 → TPM 10		TPM 10 → TPM 11		TPM 11 → TPM 12		TPM 12 → TPM 1
Metabolite ID	max	min	max	min	max	min	max	min	max	min	max	min	max	min	max	min	max	min	max	min	max	min	max	min	Metabolite Classification
cpd00023	0.00014	0	0.00025	0	2.6109	2.59114	1.95269	1.93685	0.00018	0	1e-05	0	0.00013	0	0.06087	0	0.22609	0	0.00038	0	0.00038	0	4e-05	0	Amino Acid
cpd00053	0.00013	0	0.00032	0	0.09055	0.07059	0.0154	0.0129	0.00035	0	1e-05	0	2.4473	2.44432	3.87765	3.82628	1.77301	1.64759	0.01823	0.01802	0.01815	0.01804	2e-05	0	Amino Acid
cpd00041	0.00019	0	2.91707	2.90743	0.00053	0	0.28836	0.26318	0.00055	0	2e-05	0	0.00042	0	0.08606	0.08549	9e-05	0	9e-05	0	9e-05	0	1e-05	0	Amino Acid
cpd00118	1e-05	0	1e-05	0	1e-05	0	2e-05	0	3e-05	0	2e-05	0	2e-05	0	3e-05	0	4e-05	0	5e-05	0	5e-05	0	1e-05	0	Amino Acid
cpd00035	0.00367	0	0.0028	0	0.00025	0	0.00023	0	0.00012	0	1e-05	0	0.07791	0.04757	0.0842	0.04757	0.08421	0.04757	0.07845	0.0479	0.06559	0.04802	0.0103	0.00337	Amino Acid
cpd00051	2e-05	0	2e-05	0	3e-05	0	4e-05	0	8e-05	0	6e-05	0	6e-05	0	6e-05	0	6e-05	0	6e-05	0	0.00011	0	1e-05	0	Amino Acid
cpd00132	9e-05	0	0.00013	0	0.00013	0	0.0006	0	0.95961	0.93244	1.59115	1.5747	1.24207	1.22563	0.01509	0.01467	0.01476	0.01467	0.01473	0.01467	0.01472	0.01467	1e-05	0	Amino Acid
cpd00060	1e-05	0	1e-05	0	2e-05	0	3e-05	0	5e-05	0	2e-05	0	0.00046	0	0.00636	0	0.00636	0	0.00636	0.00597	0.00636	0.00616	1e-05	0	Amino Acid
cpd00084	2e-05	0	2e-05	0	3e-05	0	4e-05	0	4e-05	0	1e-05	0	1e-05	0	2e-05	0	2e-05	0	3e-05	0	6e-05	0	5e-05	0	Amino Acid
cpd00039	1e-05	0	1e-05	0	2e-05	0	3e-05	0	5e-05	0	0.01404	0.01347	0.01404	0.01347	0.01404	0.01347	0.01404	0.01347	0.01404	0.01347	0.01404	0.01347	1e-05	0	Amino Acid
cpd00054	2e-05	0	2e-05	0	5e-05	0	0.0012	0	0.00031	0	0.03318	0.03289	0.03314	0.03245	0.03312	0.02655	0.03311	0.02655	0.02696	0.02655	0.02684	0.02655	1e-05	0	Amino Acid
cpd00033	4e-05	0	5e-05	0	8e-05	0	0.00016	0	0.00015	0	0.0227	0.02209	0.02292	0	0.02921	0	0.02921	0	0.02921	0.00508	0.02921	0.01805	1e-05	0	Amino Acid
cpd00119	1e-05	0	1e-05	0	2e-05	0	6e-05	0	0.00063	0	0.0058	0.00579	0.0058	0.00579	0.0058	0.00579	0.0058	0.00579	0.0058	0.00579	0.0058	0.00579	1e-05	0	Amino Acid
cpd00322	0.00556	0.00537	0.01105	0.01074	0.01175	0.01061	0.01175	0.00936	0.01611	0.01593	0.02287	0.02286	0.02287	0.02286	0.02287	0.02286	0.02287	0.02286	0.02287	0.02286	0.02287	0.02286	1e-05	0	Amino Acid
cpd00107	5e-05	0	0.00011	0	0.00397	0.00374	0.01641	0.01627	0.02886	0.0288	0.04134	0.04133	0.04134	0.04133	0.04134	0.04133	0.04134	0.04133	0.04134	0.04133	0.04134	0.04133	1e-05	0	Amino Acid
cpd00129	7.17527	7.17041	6.23055	6.20733	1.91397	1.90578	0.00046	0	0.00012	0	1e-05	0	0.00013	0	0.03043	0	4.39745	4.0674	8.61495	8.61071	10.8507	10.8465	13.7792	13.7765	Amino Acid
cpd00066	0.00257	0.00254	0.00485	0.00482	0.00675	0.00669	0.00911	0.00887	0.01146	0.01101	0.0116	0.01155	0.01158	0.01155	0.01157	0.01155	0.01157	0.01155	0.01157	0.01155	0.01156	0.01155	1e-05	0	Amino Acid
cpd00161	9e-05	0	7e-05	0	7e-05	0	9e-05	0	0.00015	0	0.02195	0.02193	0.02195	0.02193	0.02195	0.02193	0.02195	0.02193	0.02195	0.02193	0.02195	0.02193	1e-05	0	Amino Acid
cpd00069	0.00104	0.00101	0.00196	0.00192	0.00274	0.00268	0.00386	0.00363	0.00501	0.00457	0.00773	0.00768	0.00773	0.0077	0.00773	0.00771	0.00773	0.00771	0.00773	0.00771	0.00773	0.00771	1e-05	0	Amino Acid
cpd00065	1e-05	0	1e-05	0	2e-05	0	0.00013	0	0.00013	0	0.00362	0.00354	0.00362	0.00357	0.00362	0.00358	0.00362	0.00359	0.00362	0.0036	0.00362	0.0036	1e-05	0	Amino Acid
cpd00156	0.00815	0.00806	0.01629	0.01612	0.01907	0.0175	0.01903	0.01705	0.01892	0.01872	0.02686	0.02686	0.02686	0.02686	0.02686	0.02686	0.02686	0.02686	0.02686	0.02686	0.02686	0.02686	1e-05	0	Amino Acid
cpd00117	0.00018	0	0.0001	0	5e-05	0	3e-05	0	2e-05	0	1e-05	0	0.00673	0	0.00673	0	0.00673	0	0.00673	0	0.00673	0	0.00673	0	Amino Acid
cpd00381	1e-05	0	1e-05	0	1e-05	0	1e-05	0	1e-05	0	1e-05	0	1e-05	0	1e-05	0	1e-05	0	1e-05	0	1e-05	0	1e-05	0	Amino Acid
cpd00610	1e-05	0	1e-05	0	1e-05	0	1e-05	0	1e-05	0	1e-05	0	1e-05	0	1e-05	0	1e-05	0	1e-05	0	1e-05	0	1e-05	0	Amino Acid
cpd00169	0.00028	0	0.00028	0	0.00026	0	0.00032	0	0.00094	0	2e-05	0	0.00084	0	0.00037	0	0.00032	0	0.00021	0	0.00021	0	3e-05	0	Carbohydrate
cpd00155	0.85375	0	1.42212	0	2.08297	0	2.79654	0	3.16425	0	3.57768	0.02804	3.06998	0.02804	2.2605	0.02804	1.5885	0.02804	1.00505	0.02804	0.58556	0.02804	1e-05	0	Carbohydrate
cpd00137	1.039	0	1.0601	0	0.00046	0	0.00046	0	0.00046	0	0.00046	0	0.00046	0	0.00046	0	0.00046	0	0.00046	0	0.00046	0	1e-05	0	Carbohydrate
cpd00043	0.00024	0	7e-05	0	0.00022	0	0.00283	0	0.00025	0	1e-05	0	2e-05	0	2e-05	0	2e-05	0	2e-05	0	2e-05	0	1e-05	0	Carbohydrate
cpd00082	1e-05	0	1e-05	0	1e-05	0	1e-05	0	1e-05	0	1e-05	0	1e-05	0	1e-05	0	1e-05	0	1e-05	0	1e-05	0	1e-05	0	Carbohydrate
cpd00106	0.00012	0	0.00017	0	0.00018	0	0.00043	0	0.00024	0	2e-05	0	0.00046	0	0.00018	0	0.00018	0	0.00013	0	0.00013	0	1e-05	0	Carbohydrate
cpd00080	0.00011	0	9e-05	0	0.0001	0	0.00031	0	0.0001	0	4e-05	0	0.00011	0	9e-05	0	9e-05	0	8e-05	0	8e-05	0	1e-05	0	Carbohydrate
cpd00089	0.00018	0	0.00027	0	0.00024	0	0.00015	0	0.00015	0	1e-05	0	0.00023	0	0.00042	0	0.00035	0	0.00033	0	0.00033	0	6e-05	0	Carbohydrate
cpd15413	0.85375	0	1.42212	0	2.08297	0	2.79654	0	3.16425	0	3.54964	0	3.04194	0	2.23246	0	1.56046	0	0.97701	0	0.55752	0	1e-05	0	Carbohydrate
cpd00871	0.0002	0	0.00018	0	0.0004	0	1.10412	0	0.76456	0	2e-05	0	2e-05	0	2e-05	0	2e-05	0	2e-05	0	2e-05	0	2e-05	0	Carbohydrate
cpd00668	0.00936	0.00783	0.00936	0.00783	0.00936	0.00783	0.00936	0.00783	0.00817	0.00783	1e-05	0	0.00936	0.00772	0.00936	0.00783	0.00936	0.00783	0.00936	0.00783	0.00936	0.00783	0.00936	0.00783	Carbohydrate
cpd03049	1e-05	0	1e-05	0	1e-05	0	1e-05	0	1e-05	0	1e-05	0	1e-05	0	1e-05	0	1e-05	0	1e-05	0	1e-05	0	1e-05	0	Carbohydrate
cpd00179	1e-05	0	1e-05	0	1e-05	0	1e-05	0	1e-05	0	1e-05	0	1e-05	0	1e-05	0	1e-05	0	1e-05	0	1e-05	0	1e-05	0	Carbohydrate
cpd00027	1e-05	0	1e-05	0	1e-05	0	1e-05	0	1e-05	0	1e-05	0	1e-05	0	1e-05	0	1e-05	0	1e-05	0	1e-05	0	1e-05	0	Carbohydrate
cpd00101	0.00014	0	0.00018	0	0.00024	0	0.00045	0	0.00016	0	1e-05	0	0.00014	0	0.00021	0	0.00018	0	0.00016	0	0.00016	0	3e-05	0	Carbohydrate
cpd00196	0.00045	0	0.00023	0	0.21446	0.19866	0.11584	0.11301	0.0973	0.09609	1e-05	0	0.00014	0	0.00534	0	0.00163	0	0.00038	0	0.07799	0.07185	8e-05	0	Carbohydrate
cpd00260	1.039	0	1.0601	0	0.00046	0	4.39521	4.37851	9.1113	9.09459	13.5781	13.5614	11.3923	11.3901	9.55091	9.48898	7.3592	7.12988	5.05473	5.04478	1.18029	1.17034	1e-05	0	Carbohydrate
cpd03187	6.76819	6.72353	9.48389	9.45989	12.1364	12.1307	8.95572	8.93186	4.6437	4.62831	0.27645	0.25734	0.00052	0	0.06087	0	0.22609	0	0.16021	0.15186	1.79887	1.79053	1e-05	0	Carbohydrate
cpd00026	0.00024	0	7e-05	0	0.00022	0	0.00336	0	0.00025	0	1e-05	0	2e-05	0	2e-05	0	2e-05	0	2e-05	0	2e-05	0	1e-05	0	Carbohydrate
cpd00079	0.00018	0	0.00027	0	0.00024	0	0.00015	0	0.00015	0	1e-05	0	0.00023	0	0.00042	0	0.00035	0	0.00033	0	0.00033	0	6e-05	0	Carbohydrate
cpd00036	0.0004	0	0.00174	0	0.00031	0	0.00038	0	0.00013	0	1e-05	0	0.00023	0	0.00018	0	0.00018	0	0.0002	0	0.0002	0	2e-05	0	Carbohydrate
cpd00180	1e-05	0	1e-05	0	1e-05	0	1e-05	0	1e-05	0	1e-05	0	1e-05	0	1e-05	0	1e-05	0	1e-05	0	1e-05	0	1e-05	0	Carbohydrate
cpd00830	1e-05	0	1e-05	0	1e-05	0	1e-05	0	1e-05	0	1e-05	0	1e-05	0	1e-05	0	1e-05	0	1e-05	0	1e-05	0	1e-05	0	Carbohydrate
cpd00139	1e-05	0	1e-05	0	1e-05	0	3e-05	0	5e-05	0	3e-05	0	3e-05	0	3e-05	0	3e-05	0	3e-05	0	3e-05	0	1e-05	0	Carbohydrate
cpd00482	0.00014	0	0.00014	0	7e-05	0	1.80002	0	0.00047	0	1e-05	0	0.00083	0	0.00036	0	0.00031	0	0.0002	0	0.0002	0	2e-05	0	Carbohydrate
cpd00143	5e-05	0	3e-05	0	7e-05	0	0.00012	0	7e-05	0	1e-05	0	3e-05	0	3e-05	0	3e-05	0	2e-05	0	3e-05	0	3e-05	0	Carbohydrate
cpd00221	1e-05	0	1e-05	0	1e-05	0	2e-05	0	1e-05	0	1e-05	0	1e-05	0	1e-05	0	1e-05	0	1e-05	0	1e-05	0	1e-05	0	Carbohydrate
cpd00191	0.01641	0.01271	0.032	0.02918	0.05064	0.04995	0.00041	0	0.00041	0	1e-05	0	0.00024	0	0.02029	0	0.1776	0	0.17724	0.17647	0.10002	0.09981	2e-05	0	Carbohydrate
cpd00071	1e-05	0	1e-05	0	1e-05	0	1e-05	0	1e-05	0	1e-05	0	1e-05	0	1e-05	0	1e-05	0	1e-05	0	1e-05	0	1e-05	0	Carbohydrate
cpd00199	4.81028	4.79299	0.00455	0	0.00023	0	0.00023	0	8e-05	0	1e-05	0	1.65939	1.64654	3.62133	3.58844	3.7072	3.67432	3.90092	3.88693	5.61636	5.60237	7.86331	7.84863	Carbohydrate
cpd00868	5e-05	0	3e-05	0	9e-05	0	0.00017	0	0.0001	0	1e-05	0	1e-05	0	1e-05	0	1e-05	0	1e-05	0	1e-05	0	1e-05	0	Carbohydrate
cpd00072	0.00018	0	0.00027	0	0.00024	0	0.00015	0	0.00015	0	1e-05	0	0.00023	0	0.00042	0	0.00035	0	0.00033	0	0.00033	0	6e-05	0	Carbohydrate
cpd00290	0.00029	0	0.00054	0	1.04164	1.02778	0.00048	0	0.25826	0.24916	3e-05	0	0.00018	0	0.00019	0	0.00017	0	0.00013	0	0.00013	0	1e-05	0	Carbohydrate
cpd00235	1e-05	0	1e-05	0	1e-05	0	1e-05	0	1e-05	0	1e-05	0	1e-05	0	1e-05	0	1e-05	0	1e-05	0	1e-05	0	1e-05	0	Carbohydrate
cpd00076	1e-05	0	1e-05	0	1e-05	0	1e-05	0	1e-05	0	1e-05	0	1e-05	0	1e-05	0	1e-05	0	1e-05	0	1e-05	0	1e-05	0	Carbohydrate
cpd00911	1e-05	0	2e-05	0	2e-05	0	2e-05	0	2e-05	0	1e-05	0	1e-05	0	1e-05	0	1e-05	0	1e-05	0	1e-05	0	1e-05	0	Carbohydrate
cpd00867	1e-05	0	1e-05	0	1e-05	0	1e-05	0	1e-05	0	1e-05	0	1e-05	0	1e-05	0	1e-05	0	1e-05	0	1e-05	0	1e-05	0	Carbohydrate
cpd00095	0.0001	0	0.00011	0	0.00012	0	0.00103	0	0.00016	0	3e-05	0	9e-05	0	9e-05	0	9e-05	0	8e-05	0	8e-05	0	1e-05	0	Carbohydrate
cpd00485	1e-05	0	1e-05	0	1e-05	0	1e-05	0	1e-05	0	1e-05	0	1e-05	0	1e-05	0	1e-05	0	1e-05	0	1e-05	0	1e-05	0	Carbohydrate
cpd00083	1e-05	0	1e-05	0	1e-05	0	1e-05	0	1e-05	0	1e-05	0	1e-05	0	1e-05	0	1e-05	0	1e-05	0	1e-05	0	1e-05	0	Carbohydrate
cpd00900	1e-05	0	1e-05	0	1e-05	0	1e-05	0	1e-05	0	1e-05	0	1e-05	0	1e-05	0	1e-05	0	1e-05	0	1e-05	0	1e-05	0	Carbohydrate
cpd01536	1e-05	0	1e-05	0	1e-05	0	1e-05	0	1e-05	0	1e-05	0	1e-05	0	1e-05	0	1e-05	0	1e-05	0	1e-05	0	1e-05	0	Carbohydrate
cpd00387	6e-05	0	5e-05	0	0.00011	0	0.00011	0	0.00034	0	1e-05	0	1e-05	0	1e-05	0	1e-05	0	1e-05	0	2e-05	0	1e-05	0	Carbohydrate
cpd00348	1e-05	0	1e-05	0	1e-05	0	1e-05	0	1e-05	0	1e-05	0	1e-05	0	1e-05	0	1e-05	0	1e-05	0	1e-05	0	1e-05	0	Carbohydrate
cpd00102	0.0001	0	0.00011	0	0.00012	0	6e-05	0	0.0001	0	8e-05	0	9e-05	0	9e-05	0	9e-05	0	8e-05	0	8e-05	0	1e-05	0	Carbohydrate
cpd00157	1e-05	0	1e-05	0	1e-05	0	1e-05	0	1e-05	0	1e-05	0	1e-05	0	1e-05	0	1e-05	0	1e-05	0	1e-05	0	1e-05	0	Carbohydrate
cpd00448	1e-05	0	1e-05	0	1e-05	0	1e-05	0	1e-05	0	1e-05	0	1e-05	0	1e-05	0	1e-05	0	1e-05	0	1e-05	0	1e-05	0	Carbohydrate
cpd00105	3e-05	0	4e-05	0	4e-05	0	5e-05	0	4e-05	0	1e-05	0	1e-05	0	1e-05	0	1e-05	0	1e-05	0	1e-05	0	1e-05	0	Carbohydrate
cpd00171	0.00014	0	0.00018	0	0.00024	0	0.00045	0	0.00016	0	1e-05	0	0.00014	0	0.00021	0	0.00018	0	0.00016	0	0.00016	0	3e-05	0	Carbohydrate
cpd00475	0.00014	0	0.00018	0	0.00024	0	0.00045	0	0.00016	0	1e-05	0	0.00014	0	0.00021	0	0.00018	0	0.00016	0	0.00016	0	3e-05	0	Carbohydrate
cpd00203	0.00011	0	0.00016	0	0.00049	0	9e-05	0	0.62446	0.62232	1e-05	0	0.67778	0.67119	0.01866	0.01287	0.00116	0	0.00021	0	0.00021	0	2e-05	0	Carbohydrate
cpd00510	1e-05	0	1e-05	0	1e-05	0	1e-05	0	1e-05	0	1e-05	0	1e-05	0	1e-05	0	1e-05	0	1e-05	0	1e-05	0	1e-05	0	Carbohydrate
cpd00198	0.00014	0	0.00018	0	0.00024	0	0.00045	0	0.00016	0	1e-05	0	0.00014	0	0.00021	0	0.00018	0	0.00016	0	0.00016	0	3e-05	0	Carbohydrate
cpd00236	0.00012	0	0.00014	0	0.00012	0	5e-05	0	6e-05	0	2e-05	0	0.00012	0	0.00012	0	0.00012	0	0.00011	0	0.00011	0	2e-05	0	Carbohydrate
cpd00108	1e-05	0	1e-05	0	1e-05	0	1e-05	0	1e-05	0	1e-05	0	1e-05	0	1e-05	0	1e-05	0	1e-05	0	1e-05	0	1e-05	0	Carbohydrate
cpd00121	1e-05	0	1e-05	0	1e-05	0	1e-05	0	1e-05	0	1e-05	0	1e-05	0	1e-05	0	1e-05	0	1e-05	0	1e-05	0	1e-05	0	Carbohydrate
cpd02230	1e-05	0	1e-05	0	1e-05	0	1e-05	0	1e-05	0	1e-05	0	1e-05	0	1e-05	0	1e-05	0	1e-05	0	1e-05	0	1e-05	0	Carbohydrate
cpd02484	1e-05	0	1e-05	0	1e-05	0	1e-05	0	1e-05	0	1e-05	0	1e-05	0	1e-05	0	1e-05	0	1e-05	0	1e-05	0	1e-05	0	Carbohydrate
cpd00123	0.01332	0	0.00279	0	0.00041	0	0.00167	0	0.00031	0	1e-05	0	0.0604	0	0.0604	0	0.0604	0	0.0604	0	0.0604	0	0.0604	0	Carbohydrate
cpd01646	0.02733	0	0.01719	0	0.00466	0	0.00057	0	0.00018	0	1e-05	0	1e-05	0	1e-05	0	1e-05	0	1e-05	0	1e-05	0	1e-05	0	Carbohydrate
cpd00306	1e-05	0	1e-05	0	1e-05	0	1e-05	0	1e-05	0	1e-05	0	1e-05	0	1e-05	0	1e-05	0	1e-05	0	1e-05	0	1e-05	0	Carbohydrate
cpd00154	1e-05	0	1e-05	0	1e-05	0	1e-05	0	1e-05	0	1e-05	0	1e-05	0	1e-05	0	1e-05	0	1e-05	0	1e-05	0	1e-05	0	Carbohydrate
cpd00190	1e-05	0	1e-05	0	1e-05	0	1e-05	0	1e-05	0	1e-05	0	1e-05	0	1e-05	0	1e-05	0	1e-05	0	1e-05	0	1e-05	0	Carbohydrate
cpd00170	1e-05	0	1e-05	0	1e-05	0	1e-05	0	1e-05	0	1e-05	0	1e-05	0	1e-05	0	1e-05	0	1e-05	0	1e-05	0	1e-05	0	Carbohydrate
cpd00284	1e-05	0	1e-05	0	2e-05	0	2e-05	0	2e-05	0	1e-05	0	1e-05	0	1e-05	0	1e-05	0	1e-05	0	1e-05	0	1e-05	0	Carbohydrate
cpd00863	0.00018	0	0.00027	0	0.00024	0	0.00015	0	0.00015	0	1e-05	0	0.00023	0	0.00042	0	0.00035	0	0.00033	0	0.00033	0	6e-05	0	Carbohydrate
cpd00238	0.00024	0	0.00054	0	0.00024	0	0.00012	0	9e-05	0	1e-05	0	0.00059	0	1.63916	1.63624	1.67362	1.66711	1.35753	1.35506	0.76335	0.7575	0.00771	0.00694	Carbohydrate
cpd02605	0.00035	0	0.00281	0	0.03385	0.03293	0.02506	0.02448	0.01253	0.01235	1e-05	0	1e-05	0	1e-05	0	1e-05	0	1e-05	0	1e-05	0	1e-05	0	Carbohydrate
cpd08210	0.00332	0.00175	0.00013	0	0.00043	0	0.0006	0	0.00024	0	3e-05	0	4e-05	0	4e-05	0	4e-05	0	4e-05	0	4e-05	0	1e-05	0	Carbohydrate
cpd00349	0.00051	0	1.02593	1.01802	0.51382	0.51102	0.00024	0	0.00019	0	2e-05	0	0.00034	0	0.00036	0	0.00031	0	0.0002	0	0.0002	0	1e-05	0	Carbohydrate
cpd00334	1e-05	0	1e-05	0	1e-05	0	1e-05	0	1e-05	0	1e-05	0	1e-05	0	1e-05	0	1e-05	0	1e-05	0	1e-05	0	1e-05	0	Carbohydrate
cpd00802	1e-05	0	1e-05	0	1e-05	0	1e-05	0	1e-05	0	1e-05	0	1e-05	0	1e-05	0	1e-05	0	1e-05	0	1e-05	0	1e-05	0	Carbohydrate
cpd00501	3e-05	0	3e-05	0	4e-05	0	5e-05	0	6e-05	0	1e-05	0	1e-05	0	1e-05	0	1e-05	0	1e-05	0	1e-05	0	1e-05	0	Carbohydrate
cpd01242	1e-05	0	1e-05	0	1e-05	0	1e-05	0	1e-05	0	1e-05	0	1e-05	0	1e-05	0	1e-05	0	1e-05	0	1e-05	0	1e-05	0	Carbohydrate
cpd02693	0.01253	0.01161	0.02506	0.02225	0.00092	0	0.00057	0	0.00018	0	1e-05	0	1e-05	0	1e-05	0	1e-05	0	1e-05	0	1e-05	0	1e-05	0	Carbohydrate
cpd00498	0.00014	0	0.00028	0	0.00276	0.00176	0.0042	0.00319	0.00079	0.00042	1e-05	0	1e-05	0	1e-05	0	1e-05	0	1e-05	0	1e-05	0	1e-05	0	Carbohydrate
cpd10162	1e-05	0	1e-05	0	1e-05	0	1e-05	0	1e-05	0	1e-05	0	1e-05	0	1e-05	0	1e-05	0	1e-05	0	1e-05	0	1e-05	0	Carbohydrate
cpd01855	1e-05	0	1e-05	0	1e-05	0	1e-05	0	1e-05	0	1e-05	0	1e-05	0	1e-05	0	1e-05	0	1e-05	0	1e-05	0	1e-05	0	Carbohydrate
cpd00356	2e-05	0	2e-05	0	5e-05	0	4e-05	0	4e-05	0	2e-05	0	2e-05	0	2e-05	0	2e-05	0	2e-05	0	5e-05	0	1e-05	0	DNA
cpd00241	1e-05	0	1e-05	0	1e-05	0	2e-05	0	2e-05	0	2e-05	0	2e-05	0	2e-05	0	2e-05	0	2e-05	0	5e-05	0	1e-05	0	DNA
cpd00115	1e-05	0	1e-05	0	1e-05	0	2e-05	0	2e-05	0	2e-05	0	2e-05	0	2e-05	0	2e-05	0	2e-05	0	5e-05	0	1e-05	0	DNA
cpd00177	1e-05	0	1e-05	0	2e-05	0	1e-05	0	2e-05	0	1e-05	0	1e-05	0	1e-05	0	2e-05	0	3e-05	0	6e-05	0	1e-05	0	DNA
cpd00294	1e-05	0	1e-05	0	1e-05	0	1e-05	0	1e-05	0	1e-05	0	1e-05	0	1e-05	0	1e-05	0	1e-05	0	1e-05	0	1e-05	0	DNA
cpd00298	3e-05	0	5e-05	0	0.00022	0	0.00022	0	6e-05	0	1e-05	0	1e-05	0	1e-05	0	1e-05	0	1e-05	0	1e-05	0	1e-05	0	DNA
cpd00296	1e-05	0	1e-05	0	1e-05	0	1e-05	0	1e-05	0	1e-05	0	1e-05	0	1e-05	0	1e-05	0	1e-05	0	1e-05	0	1e-05	0	DNA
cpd00277	1e-05	0	1e-05	0	1e-05	0	1e-05	0	1e-05	0	1e-05	0	1e-05	0	1e-05	0	1e-05	0	1e-05	0	1e-05	0	1e-05	0	DNA
cpd00295	1e-05	0	1e-05	0	1e-05	0	2e-05	0	2e-05	0	1e-05	0	1e-05	0	1e-05	0	2e-05	0	3e-05	0	6e-05	0	1e-05	0	DNA
cpd00297	2e-05	0	3e-05	0	0.00018	0	0.00045	0	0.00013	0	1e-05	0	1e-05	0	1e-05	0	1e-05	0	1e-05	0	1e-05	0	1e-05	0	DNA
cpd00299	0.00088	0.0008	0.00171	0.00161	0.00266	0.0024	8e-05	0	4e-05	0	1e-05	0	1e-05	0	1e-05	0	1e-05	0	1e-05	0	1e-05	0	1e-05	0	DNA
cpd00978	0.00272	0.00225	0.00191	0.00142	0.00102	0	0.0001	0	6e-05	0	1e-05	0	1e-05	0	1e-05	0	2e-05	0	3e-05	0	6e-05	0	0.00353	0.00311	DNA
cpd00358	0.00029	0	0.00017	0	0.00091	0	0.00013	0	0.0001	0	1e-05	0	1e-05	0	1e-05	0	1e-05	0	1e-05	0	1e-05	0	1e-05	0	DNA
cpd00533	3e-05	0	3e-05	0	5e-05	0	4e-05	0	3e-05	0	1e-05	0	1e-05	0	1e-05	0	2e-05	0	3e-05	0	6e-05	0	1e-05	0	DNA
cpd11461	1e-05	0	1e-05	0	1e-05	0	1e-05	0	1e-05	0	1e-05	0	1e-05	0	1e-05	0	1e-05	0	1e-05	0	1e-05	0	1e-05	0	DNA
cpd00002	4e-05	0	4e-05	0	8e-05	0	0.0001	0	0.19221	0.18034	1.60681	1.6003	0.00083	0	0.00036	0	0.00031	0	0.0002	0	0.0002	0	1e-05	0	Energy Metabolites
cpd00038	2e-05	0	2e-05	0	4e-05	0	0.00043	0	0.01607	0.01514	0.0209	0.02087	0.00083	0	0.00036	0	0.00031	0	0.0002	0	0.0002	0	1e-05	0	Energy Metabolites
cpd00052	4e-05	0	4e-05	0	0.0001	0	0.03593	0.02615	0.04263	0.03373	0.0453	0.04464	0.00083	0	0.00036	0	0.00031	0	0.0002	0	0.0002	0	1e-05	0	Energy Metabolites
cpd00982	1e-05	0	1e-05	0	1e-05	0	2e-05	0	3e-05	0	2e-05	0	4e-05	0	4e-05	0	4e-05	0	4e-05	0	4e-05	0	1e-05	0	Energy Metabolites
cpd00062	9e-05	0	4e-05	0	0.00011	0	0.00837	0	0.00049	0	2e-05	0	0.00042	0	0.00036	0	0.00031	0	0.0002	0	0.0002	0	1e-05	0	Energy Metabolites
cpd14881	1e-05	0	1e-05	0	2e-05	0	2e-05	0	2e-05	0	1e-05	0	1e-05	0	1e-05	0	1e-05	0	1e-05	0	1e-05	0	1e-05	0	Fatty Acid
cpdLiG3P	3e-05	0	3e-05	0	3e-05	0	2e-05	0	2e-05	0	1e-05	0	1e-05	0	1e-05	0	1e-05	0	1e-05	0	1e-05	0	1e-05	0	Fatty Acid
cpd14882	1e-05	0	1e-05	0	1e-05	0	2e-05	0	2e-05	0	2e-05	0	2e-05	0	2e-05	0	2e-05	0	2e-05	0	2e-05	0	1e-05	0	Fatty Acid
cp_aLG3P	1e-05	0	1e-05	0	3e-05	0	5e-05	0	4e-05	0	1e-05	0	1e-05	0	1e-05	0	1e-05	0	1e-05	0	1e-05	0	1e-05	0	Fatty Acid
1odec9eg3p	1e-05	0	1e-05	0	1e-05	0	1e-05	0	1e-05	0	1e-05	0	1e-05	0	1e-05	0	1e-05	0	1e-05	0	1e-05	0	1e-05	0	Fatty Acid
cpd11825	3e-05	0	3e-05	0	3e-05	0	2e-05	0	3e-05	0	1e-05	0	1e-05	0	1e-05	0	1e-05	0	1e-05	0	1e-05	0	1e-05	0	Fatty Acid
1odec6912eg3p	1e-05	0	1e-05	0	3e-05	0	5e-05	0	4e-05	0	1e-05	0	1e-05	0	1e-05	0	1e-05	0	1e-05	0	1e-05	0	1e-05	0	Fatty Acid
octe6912ACP	1e-05	0	1e-05	0	1e-05	0	2e-05	0	2e-05	0	1e-05	0	1e-05	0	1e-05	0	1e-05	0	1e-05	0	1e-05	0	1e-05	0	Fatty Acid
1odec691215eg3p	1e-05	0	1e-05	0	2e-05	0	6e-05	0	5e-05	0	1e-05	0	1e-05	0	1e-05	0	1e-05	0	1e-05	0	1e-05	0	1e-05	0	Fatty Acid
octe691215ACP	1e-05	0	1e-05	0	1e-05	0	2e-05	0	2e-05	0	1e-05	0	1e-05	0	1e-05	0	1e-05	0	1e-05	0	1e-05	0	1e-05	0	Fatty Acid
cpd12458	1e-05	0	1e-05	0	1e-05	0	1e-05	0	1e-05	0	1e-05	0	1e-05	0	1e-05	0	1e-05	0	1e-05	0	1e-05	0	1e-05	0	Fatty Acid
cpd08376	1e-05	0	1e-05	0	1e-05	0	1e-05	0	1e-05	0	1e-05	0	1e-05	0	1e-05	0	1e-05	0	1e-05	0	1e-05	0	1e-05	0	Fatty Acid
cpd00214	2e-05	0	2e-05	0	1e-05	0	1e-05	0	1e-05	0	1e-05	0	1e-05	0	1e-05	0	1e-05	0	1e-05	0	1e-05	0	1e-05	0	Fatty Acid
cpd00134	1e-05	0	1e-05	0	1e-05	0	1e-05	0	1e-05	0	1e-05	0	1e-05	0	1e-05	0	1e-05	0	1e-05	0	1e-05	0	1e-05	0	Fatty Acid
cpd00453	1e-05	0	1e-05	0	1e-05	0	1e-05	0	1e-05	0	1e-05	0	1e-05	0	1e-05	0	1e-05	0	1e-05	0	1e-05	0	1e-05	0	Fatty Acid
cpd02569	1e-05	0	1e-05	0	1e-05	0	1e-05	0	1e-05	0	1e-05	0	1e-05	0	1e-05	0	1e-05	0	1e-05	0	1e-05	0	1e-05	0	Fatty Acid
cpd11476	1e-05	0	1e-05	0	1e-05	0	1e-05	0	1e-05	0	1e-05	0	1e-05	0	1e-05	0	1e-05	0	1e-05	0	1e-05	0	1e-05	0	Fatty Acid
cpd11484	3e-05	0	3e-05	0	3e-05	0	2e-05	0	2e-05	0	1e-05	0	1e-05	0	1e-05	0	1e-05	0	1e-05	0	1e-05	0	1e-05	0	Fatty Acid
cpd11492	1e-05	0	3e-05	0	3e-05	0	2e-05	0	2e-05	0	2e-05	0	2e-05	0	2e-05	0	2e-05	0	2e-05	0	2e-05	0	1e-05	0	Fatty Acid
cpd14938	1e-05	0	1e-05	0	1e-05	0	1e-05	0	1e-05	0	1e-05	0	1e-05	0	1e-05	0	1e-05	0	1e-05	0	1e-05	0	1e-05	0	Fatty Acid
cpd15375	2e-05	0	2e-05	0	2e-05	0	2e-05	0	2e-05	0	1e-05	0	1e-05	0	1e-05	0	1e-05	0	1e-05	0	1e-05	0	1e-05	0	Fatty Acid
cpd11464	1e-05	0	2e-05	0	2e-05	0	2e-05	0	2e-05	0	1e-05	0	1e-05	0	1e-05	0	1e-05	0	1e-05	0	1e-05	0	1e-05	0	Fatty Acid
cpd11467	2e-05	0	2e-05	0	2e-05	0	1e-05	0	1e-05	0	1e-05	0	1e-05	0	1e-05	0	1e-05	0	1e-05	0	1e-05	0	1e-05	0	Fatty Acid
cpd11466	2e-05	0	2e-05	0	2e-05	0	2e-05	0	2e-05	0	1e-05	0	1e-05	0	1e-05	0	1e-05	0	1e-05	0	1e-05	0	1e-05	0	Fatty Acid
cpd11469	2e-05	0	3e-05	0	3e-05	0	2e-05	0	2e-05	0	1e-05	0	1e-05	0	1e-05	0	1e-05	0	1e-05	0	1e-05	0	1e-05	0	Fatty Acid
cpd11468	3e-05	0	3e-05	0	2e-05	0	2e-05	0	2e-05	0	1e-05	0	1e-05	0	1e-05	0	1e-05	0	1e-05	0	1e-05	0	1e-05	0	Fatty Acid
cpd11471	2e-05	0	3e-05	0	2e-05	0	2e-05	0	2e-05	0	1e-05	0	1e-05	0	1e-05	0	1e-05	0	1e-05	0	1e-05	0	1e-05	0	Fatty Acid
cpd11470	2e-05	0	3e-05	0	2e-05	0	2e-05	0	2e-05	0	1e-05	0	1e-05	0	1e-05	0	1e-05	0	1e-05	0	1e-05	0	1e-05	0	Fatty Acid
cpd11473	1e-05	0	3e-05	0	2e-05	0	2e-05	0	2e-05	0	1e-05	0	1e-05	0	1e-05	0	1e-05	0	1e-05	0	1e-05	0	1e-05	0	Fatty Acid
cpd11472	1e-05	0	3e-05	0	2e-05	0	2e-05	0	2e-05	0	1e-05	0	1e-05	0	1e-05	0	1e-05	0	1e-05	0	1e-05	0	1e-05	0	Fatty Acid
cpd11475	2e-05	0	3e-05	0	2e-05	0	2e-05	0	2e-05	0	1e-05	0	1e-05	0	1e-05	0	1e-05	0	1e-05	0	1e-05	0	1e-05	0	Fatty Acid
cpd11474	2e-05	0	3e-05	0	2e-05	0	2e-05	0	2e-05	0	1e-05	0	1e-05	0	1e-05	0	1e-05	0	1e-05	0	1e-05	0	1e-05	0	Fatty Acid
cpd11477	1e-05	0	1e-05	0	1e-05	0	1e-05	0	1e-05	0	1e-05	0	1e-05	0	1e-05	0	1e-05	0	1e-05	0	1e-05	0	1e-05	0	Fatty Acid
cpd11478	1e-05	0	2e-05	0	2e-05	0	2e-05	0	2e-05	0	1e-05	0	1e-05	0	1e-05	0	1e-05	0	1e-05	0	1e-05	0	1e-05	0	Fatty Acid
cpd11479	1e-05	0	3e-05	0	2e-05	0	2e-05	0	2e-05	0	1e-05	0	1e-05	0	1e-05	0	1e-05	0	1e-05	0	1e-05	0	1e-05	0	Fatty Acid
cpd11480	2e-05	0	3e-05	0	3e-05	0	2e-05	0	2e-05	0	1e-05	0	1e-05	0	1e-05	0	1e-05	0	1e-05	0	1e-05	0	1e-05	0	Fatty Acid
cpd11481	3e-05	0	2e-05	0	3e-05	0	3e-05	0	3e-05	0	1e-05	0	1e-05	0	1e-05	0	1e-05	0	1e-05	0	1e-05	0	1e-05	0	Fatty Acid
cpd11482	2e-05	0	3e-05	0	2e-05	0	2e-05	0	2e-05	0	1e-05	0	1e-05	0	1e-05	0	1e-05	0	1e-05	0	1e-05	0	1e-05	0	Fatty Acid
cpd11483	2e-05	0	3e-05	0	2e-05	0	2e-05	0	2e-05	0	1e-05	0	1e-05	0	1e-05	0	1e-05	0	1e-05	0	1e-05	0	1e-05	0	Fatty Acid
cpd11485	3e-05	0	3e-05	0	3e-05	0	3e-05	0	3e-05	0	1e-05	0	1e-05	0	1e-05	0	1e-05	0	1e-05	0	1e-05	0	1e-05	0	Fatty Acid
cpd11486	1e-05	0	3e-05	0	2e-05	0	2e-05	0	2e-05	0	1e-05	0	1e-05	0	1e-05	0	1e-05	0	1e-05	0	1e-05	0	1e-05	0	Fatty Acid
cpd11487	2e-05	0	3e-05	0	2e-05	0	2e-05	0	2e-05	0	1e-05	0	1e-05	0	1e-05	0	1e-05	0	1e-05	0	1e-05	0	1e-05	0	Fatty Acid
cpd11488	1e-05	0	2e-05	0	2e-05	0	2e-05	0	2e-05	0	1e-05	0	1e-05	0	1e-05	0	1e-05	0	1e-05	0	1e-05	0	1e-05	0	Fatty Acid
cpd11489	2e-05	0	3e-05	0	3e-05	0	2e-05	0	2e-05	0	1e-05	0	1e-05	0	1e-05	0	1e-05	0	1e-05	0	1e-05	0	1e-05	0	Fatty Acid
cpd11490	2e-05	0	3e-05	0	2e-05	0	2e-05	0	2e-05	0	1e-05	0	1e-05	0	1e-05	0	1e-05	0	1e-05	0	1e-05	0	1e-05	0	Fatty Acid
cpd11491	3e-05	0	3e-05	0	3e-05	0	3e-05	0	3e-05	0	1e-05	0	1e-05	0	1e-05	0	1e-05	0	1e-05	0	1e-05	0	1e-05	0	Fatty Acid
cpd03847	0.00781	0.00771	0.00781	0.00771	0.00781	0.00771	8e-05	0	6e-05	0	1e-05	0	1e-05	0	1e-05	0	1e-05	0	1e-05	0	1e-05	0	1e-05	0	Fatty Acid
cpd14939	1e-05	0	1e-05	0	1e-05	0	1e-05	0	1e-05	0	1e-05	0	1e-05	0	1e-05	0	1e-05	0	1e-05	0	1e-05	0	1e-05	0	Fatty Acid
cpd14940	1e-05	0	1e-05	0	1e-05	0	1e-05	0	1e-05	0	1e-05	0	1e-05	0	1e-05	0	1e-05	0	1e-05	0	1e-05	0	1e-05	0	Fatty Acid
cpd15366	2e-05	0	2e-05	0	2e-05	0	1e-05	0	2e-05	0	1e-05	0	1e-05	0	1e-05	0	1e-05	0	1e-05	0	1e-05	0	1e-05	0	Fatty Acid
cpd15569	2e-05	0	2e-05	0	2e-05	0	1e-05	0	2e-05	0	1e-05	0	1e-05	0	1e-05	0	1e-05	0	1e-05	0	1e-05	0	1e-05	0	Fatty Acid
cpd15368	2e-05	0	2e-05	0	2e-05	0	2e-05	0	2e-05	0	1e-05	0	1e-05	0	1e-05	0	1e-05	0	1e-05	0	1e-05	0	1e-05	0	Fatty Acid
cpd15570	2e-05	0	2e-05	0	2e-05	0	2e-05	0	2e-05	0	1e-05	0	1e-05	0	1e-05	0	1e-05	0	1e-05	0	1e-05	0	1e-05	0	Fatty Acid
cpd15369	2e-05	0	2e-05	0	2e-05	0	2e-05	0	2e-05	0	1e-05	0	1e-05	0	1e-05	0	1e-05	0	1e-05	0	1e-05	0	1e-05	0	Fatty Acid
cpd15571	2e-05	0	2e-05	0	2e-05	0	2e-05	0	2e-05	0	1e-05	0	1e-05	0	1e-05	0	1e-05	0	1e-05	0	1e-05	0	1e-05	0	Fatty Acid
cpd15370	3e-05	0	3e-05	0	3e-05	0	3e-05	0	3e-05	0	2e-05	0	1e-05	0	1e-05	0	1e-05	0	1e-05	0	1e-05	0	1e-05	0	Fatty Acid
cpd15568	3e-05	0	3e-05	0	3e-05	0	3e-05	0	3e-05	0	2e-05	0	1e-05	0	1e-05	0	1e-05	0	1e-05	0	1e-05	0	1e-05	0	Fatty Acid
cpd15373	2e-05	0	2e-05	0	2e-05	0	2e-05	0	2e-05	0	1e-05	0	1e-05	0	1e-05	0	1e-05	0	1e-05	0	1e-05	0	1e-05	0	Fatty Acid
cpd15374	2e-05	0	2e-05	0	2e-05	0	2e-05	0	2e-05	0	1e-05	0	1e-05	0	1e-05	0	1e-05	0	1e-05	0	1e-05	0	1e-05	0	Fatty Acid
cpd15376	3e-05	0	3e-05	0	3e-05	0	3e-05	0	3e-05	0	1e-05	0	1e-05	0	1e-05	0	1e-05	0	1e-05	0	1e-05	0	1e-05	0	Fatty Acid
cpd15416	1e-05	0	2e-05	0	1e-05	0	1e-05	0	1e-05	0	1e-05	0	1e-05	0	1e-05	0	1e-05	0	1e-05	0	1e-05	0	1e-05	0	Fatty Acid
cpd15415	2e-05	0	2e-05	0	2e-05	0	1e-05	0	1e-05	0	1e-05	0	1e-05	0	1e-05	0	1e-05	0	1e-05	0	1e-05	0	1e-05	0	Fatty Acid
cpd15294	2e-05	0	2e-05	0	2e-05	0	1e-05	0	2e-05	0	1e-05	0	1e-05	0	1e-05	0	1e-05	0	1e-05	0	1e-05	0	1e-05	0	Fatty Acid
cpd15239	3e-05	0	2e-05	0	3e-05	0	3e-05	0	3e-05	0	1e-05	0	1e-05	0	1e-05	0	1e-05	0	1e-05	0	1e-05	0	1e-05	0	Fatty Acid
cpd00009	6e-05	0	6e-05	0	7e-05	0	8e-05	0	0.0001	0	2e-05	0	0.0001	0	9e-05	0	9e-05	0	9e-05	0	9e-05	0	8e-05	0	Inorganic Ions
cpd00001	0.00012	0	0.00012	0	0.0001	0	9e-05	0	0.0001	0	7e-05	0	7e-05	0	7e-05	0	8e-05	0	8e-05	0	9e-05	0	0.00012	0	Inorganic Ions
cpd00242	0.00168	0	0.0012	0	0.0002	0	0.00016	0	0.00024	0	2e-05	0	0.00044	0	0.00021	0	0.00021	0	0.00024	0	0.00025	0	4e-05	0	Inorganic Ions
cpd00013	8e-05	0	0.00011	0	8e-05	0	7e-05	0	7e-05	0	3e-05	0	8e-05	0	6e-05	0	6e-05	0	6e-05	0	6e-05	0	5e-05	0	Inorganic Ions
cpd00205	1e-05	0	1e-05	0	1e-05	0	2e-05	0	2e-05	0	3e-05	0	3e-05	0	3e-05	0	3e-05	0	3e-05	0	5e-05	0	1e-05	0	Inorganic Ions
cpd00034	1e-05	0	1e-05	0	2e-05	0	3e-05	0	6e-05	0	0.00041	0.00039	0.00041	0.00039	0.00041	0.00039	0.00041	0.00039	0.00041	0.00039	0.00041	0.00039	1e-05	0	Inorganic Ions
cpd00063	6e-05	0	7e-05	0	6e-05	0	6e-05	0	0.00022	0	0.00061	0.00059	0.00061	0.00059	0.00061	0.00059	0.00061	0.00059	0.00061	0.00059	0.00061	0.00059	1e-05	0	Inorganic Ions
cpd00058	1e-05	0	1e-05	0	2e-05	0	3e-05	0	6e-05	0	0.00041	0.00039	0.00041	0.00039	0.00041	0.00039	0.00041	0.00039	0.00041	0.00039	0.00041	0.00039	1e-05	0	Inorganic Ions
cpd00971	1e-05	0	1e-05	0	1e-05	0	1e-05	0	1e-05	0	1e-05	0	2e-05	0	2e-05	0	3e-05	0	4e-05	0	9e-05	0	1e-05	0	Inorganic Ions
cpd00149	1e-05	0	2e-05	0	2e-05	0	3e-05	0	3e-05	0	1e-05	0	1e-05	0	2e-05	0	2e-05	0	3e-05	0	6e-05	0	1e-05	0	Inorganic Ions
cpd10515	1e-05	0	1e-05	0	2e-05	0	3e-05	0	6e-05	0	0.00091	0.00089	0.00091	0.00089	0.00091	0.00089	0.00091	0.00089	0.00091	0.00089	0.00091	0.00089	1e-05	0	Inorganic Ions
cpd00254	1e-05	0	1e-05	0	2e-05	0	3e-05	0	6e-05	0	0.00101	0.00099	0.00101	0.00099	0.00101	0.00099	0.00101	0.00099	0.00101	0.00099	0.00101	0.00099	1e-05	0	Inorganic Ions
cpd00048	2e-05	0	4e-05	0	5e-05	0	5e-05	0	6e-05	0	0.00055	0.00049	0.00054	0.00049	0.00054	0.00049	0.00053	0.00049	0.00052	0.00049	0.00052	0.00049	1e-05	0	Inorganic Ions
cpd11574	1e-05	0	1e-05	0	2e-05	0	3e-05	0	6e-05	0	0.00041	0.00039	0.00041	0.00039	0.00041	0.00039	0.00041	0.00039	0.00041	0.00039	0.00041	0.00039	1e-05	0	Inorganic Ions
cpd10516	1e-05	0	1e-05	0	2e-05	0	3e-05	0	6e-05	0	0.00093	0.00089	0.00093	0.00089	0.00093	0.00089	0.00093	0.00089	0.00093	0.00089	0.00093	0.00089	1e-05	0	Inorganic Ions
cpd00030	1e-05	0	1e-05	0	1e-05	0	2e-05	0	2e-05	0	3e-05	0	3e-05	0	3e-05	0	3e-05	0	3e-05	0	5e-05	0	1e-05	0	Inorganic Ions
cpd00244	1e-05	0	1e-05	0	1e-05	0	1e-05	0	1e-05	0	1e-05	0	1e-05	0	1e-05	0	1e-05	0	1e-05	0	1e-05	0	1e-05	0	Inorganic Ions
cpd00209	0.26515	0.26488	0.5283	0.52805	0.61033	0.61009	0.67976	0.67929	0.3502	0.3495	0.00045	0	4e-05	0	2e-05	0	1e-05	0	1e-05	0	1e-05	0	1e-05	0	Inorganic Ions
cpd00421	3e-05	0	3e-05	0	5e-05	0	7e-05	0	0.00011	0	1e-05	0	1e-05	0	1e-05	0	1e-05	0	1e-05	0	1e-05	0	1e-05	0	Inorganic Ions
cpd00268	1e-05	0	1e-05	0	1e-05	0	2e-05	0	2e-05	0	1e-05	0	1e-05	0	1e-05	0	1e-05	0	1e-05	0	1e-05	0	1e-05	0	Inorganic Ions
cpd00081	2e-05	0	3e-05	0	5e-05	0	5e-05	0	5e-05	0	2e-05	0	3e-05	0	2e-05	0	3e-05	0	3e-05	0	3e-05	0	3e-05	0	Inorganic Ions
cpd00075	0.00023	0	0.00023	0	0.00023	0	0.00045	0	0.42376	0.42306	0.86232	0.86186	4e-05	0	2e-05	0	1e-05	0	1e-05	0	1e-05	0	1e-05	0	Inorganic Ions
cpd01048	1e-05	0	1e-05	0	1e-05	0	1e-05	0	1e-05	0	1e-05	0	1e-05	0	1e-05	0	1e-05	0	1e-05	0	1e-05	0	1e-05	0	Inorganic Ions
cpd04098	1e-05	0	1e-05	0	1e-05	0	1e-05	0	1e-05	0	1e-05	0	1e-05	0	1e-05	0	1e-05	0	1e-05	0	1e-05	0	1e-05	0	Inorganic Ions
c_DLiG3P	0.00206	0.00165	0.00193	0.00165	0.00193	0.00104	0.00124	0.00096	0.00124	0.00085	3e-05	0	3e-05	0	3e-05	0	3e-05	0	3e-05	0	3e-05	0	1e-05	0	Lipids
c_DaLG3P	1e-05	0	1e-05	0	2e-05	0	0.00019	0	0.00014	0	2e-05	0	2e-05	0	2e-05	0	2e-05	0	2e-05	0	2e-05	0	1e-05	0	Lipids
pa181:9	0.00064	0.00039	0.00064	0.00038	0.00062	0.00033	0.00059	0.00029	0.00056	0.00017	1e-05	0	1e-05	0	1e-05	0	1e-05	0	1e-05	0	1e-05	0	1e-05	0	Lipids
pa183:6:9:12	1e-05	0	1e-05	0	2e-05	0	0.00337	0.00169	0.00231	0.00149	1e-05	0	1e-05	0	1e-05	0	1e-05	0	1e-05	0	1e-05	0	1e-05	0	Lipids
pa184:6:9:12:15	1e-05	0	1e-05	0	1e-05	0	0.00015	0	0.00015	0	1e-05	0	1e-05	0	1e-05	0	1e-05	0	1e-05	0	1e-05	0	1e-05	0	Lipids
cpdMG160	0.00056	0	0.00343	0.00298	0.00414	0.00374	0.00413	0.00375	0.0041	0.00386	0.00405	0.00403	0.00405	0.00403	0.00405	0.00403	0.00405	0.00403	0.00405	0.00403	0.00405	0.00403	1e-05	0	Lipids
cpdDG160	0.00277	0.00247	0.00277	0.00262	0.00277	0.00267	0.00277	0.00269	0.00277	0.00271	0.00277	0.00276	0.00277	0.00276	0.00277	0.00276	0.00277	0.00276	0.00277	0.00276	0.00277	0.00276	1e-05	0	Lipids
cpdMG161	0.00026	0	0.00039	0	0.00034	8e-05	0.00032	9e-05	0.0003	0.00012	0.00025	0.00022	0.00025	0.00022	0.00025	0.00022	0.00025	0.00022	0.00025	0.00022	0.00025	0.00022	1e-05	0	Lipids
cpdDG161	0.00021	0	0.00021	5e-05	0.00021	0.0001	0.00021	0.00012	0.00021	0.00014	0.00021	0.00019	0.00021	0.00019	0.00021	0.00019	0.00021	0.00019	0.00021	0.00019	0.00021	0.00019	1e-05	0	Lipids
cpdMG180	6e-05	0	6e-05	0	6e-05	0	6e-05	0	6e-05	0	2e-05	0	2e-05	0	2e-05	0	2e-05	0	2e-05	0	2e-05	0	1e-05	0	Lipids
cpdDG180	5e-05	0	5e-05	0	5e-05	0	5e-05	0	5e-05	0	5e-05	4e-05	5e-05	4e-05	5e-05	4e-05	5e-05	4e-05	5e-05	4e-05	5e-05	4e-05	1e-05	0	Lipids
mgdg181	0.00016	0	0.00016	0	0.00016	0	0.00016	1e-05	0.00016	3e-05	0.00011	9e-05	0.00011	9e-05	0.00011	9e-05	0.00011	9e-05	0.00011	9e-05	0.00011	9e-05	1e-05	0	Lipids
dgdg181	7e-05	0	7e-05	0	7e-05	0	7e-05	0	7e-05	0	7e-05	5e-05	7e-05	5e-05	7e-05	5e-05	7e-05	5e-05	7e-05	5e-05	7e-05	5e-05	1e-05	0	Lipids
cpdMG181	0.00016	0	0.00016	0	0.00016	0	0.00016	0	0.00016	0	0.00011	8e-05	0.00011	8e-05	0.00011	8e-05	0.00011	8e-05	0.00011	8e-05	0.00011	8e-05	1e-05	0	Lipids
cpdDG181	7e-05	0	7e-05	0	7e-05	0	7e-05	0	7e-05	0	7e-05	5e-05	7e-05	5e-05	7e-05	5e-05	7e-05	5e-05	7e-05	5e-05	7e-05	5e-05	1e-05	0	Lipids
cpdMG182	0.00159	0.00099	0.00144	0.00113	0.00139	0.00113	0.00137	0.00113	0.00135	0.00113	0.0013	0.00126	0.0013	0.00126	0.0013	0.00126	0.0013	0.00126	0.0013	0.00126	0.0013	0.00126	1e-05	0	Lipids
cpdDG182	0.00071	0.00041	0.00071	0.00056	0.00071	0.00061	0.00071	0.00063	0.00071	0.00065	0.00071	0.0007	0.00071	0.0007	0.00071	0.0007	0.00071	0.0007	0.00071	0.0007	0.00071	0.0007	1e-05	0	Lipids
mgdg183:6:9:12	1e-05	0	1e-05	0	2e-05	0	0.00043	0	0.00046	0	0.00193	0.00191	0.00193	0.00191	0.00193	0.00191	0.00193	0.00191	0.00193	0.00191	0.00193	0.00191	1e-05	0	Lipids
dgdg183:6:9:12	1e-05	0	1e-05	0	2e-05	0	0.00154	0.00012	0.00154	0.00118	0.00154	0.00153	0.00154	0.00153	0.00154	0.00153	0.00154	0.00153	0.00154	0.00153	0.00154	0.00153	1e-05	0	Lipids
cpdMG183	1e-05	0	1e-05	0	2e-05	0	3e-05	0	3e-05	0	2e-05	0	2e-05	0	2e-05	0	2e-05	0	2e-05	0	2e-05	0	1e-05	0	Lipids
cpdDG183	1e-05	0	1e-05	0	2e-05	0	3e-05	0	3e-05	0	3e-05	1e-05	3e-05	1e-05	3e-05	1e-05	3e-05	1e-05	3e-05	1e-05	3e-05	1e-05	1e-05	0	Lipids
mgdg184:6:9:12:15	1e-05	0	1e-05	0	1e-05	0	0.00014	0	0.00014	0	7e-05	5e-05	7e-05	5e-05	7e-05	5e-05	7e-05	5e-05	7e-05	5e-05	7e-05	5e-05	1e-05	0	Lipids
dgdg184:6:9:12:15	1e-05	0	1e-05	0	1e-05	0	9e-05	0	9e-05	0	9e-05	7e-05	9e-05	7e-05	9e-05	7e-05	9e-05	7e-05	9e-05	7e-05	9e-05	7e-05	1e-05	0	Lipids
cpd03002	0.00019	0	0.00224	0.00191	0.00224	0.00191	0.00224	0.00191	0.00337	0.0032	0.00337	0.00336	0.00337	0.00336	0.00337	0.00336	0.00337	0.00336	0.00337	0.00336	0.00337	0.00336	1e-05	0	Lipids
cpd15538	3e-05	0	3e-05	0	5e-05	0	9e-05	0	0.00015	0	0.00107	0.00105	0.00107	0.00105	0.00107	0.00105	0.00107	0.00105	0.00107	0.00105	0.00107	0.00105	1e-05	0	Lipids
cpd15539	2e-05	0	2e-05	0	2e-05	0	2e-05	0	2e-05	0	2e-05	1e-05	2e-05	1e-05	2e-05	1e-05	2e-05	1e-05	2e-05	1e-05	2e-05	1e-05	1e-05	0	Lipids
cpd15540	3e-05	0	3e-05	0	4e-05	0	4e-05	0	4e-05	0	4e-05	3e-05	4e-05	3e-05	4e-05	3e-05	4e-05	3e-05	4e-05	3e-05	4e-05	3e-05	1e-05	0	Lipids
cpd15541	3e-05	0	3e-05	0	5e-05	0	7e-05	0	7e-05	0	7e-05	6e-05	7e-05	6e-05	7e-05	6e-05	7e-05	6e-05	7e-05	6e-05	7e-05	6e-05	1e-05	0	Lipids
cpdPG181	3e-05	0	4e-05	0	6e-05	0	7e-05	0	7e-05	0	7e-05	1e-05	7e-05	1e-05	7e-05	1e-05	7e-05	1e-05	7e-05	1e-05	7e-05	1e-05	1e-05	0	Lipids
cpdPG182	1e-05	0	1e-05	0	2e-05	0	2e-05	0	2e-05	0	2e-05	0	0.00024	0	0.0007	0	0.0007	0	0.0007	0	0.0007	0	1e-05	0	Lipids
pg183:6:9:12	1e-05	0	1e-05	0	1e-05	0	1e-05	0	1e-05	0	1e-05	0	1e-05	0	1e-05	0	1e-05	0	1e-05	0	1e-05	0	1e-05	0	Lipids
cpdPG183	1e-05	0	1e-05	0	1e-05	0	2e-05	0	2e-05	0	2e-05	0	0.00017	0	0.00018	0	0.00018	0	0.00018	0	0.00018	0	1e-05	0	Lipids
pg184:6:9:12:15	1e-05	0	1e-05	0	1e-05	0	1e-05	0	1e-05	0	1e-05	0	1e-05	0	1e-05	0	1e-05	0	1e-05	0	1e-05	0	1e-05	0	Lipids
cpd02229	2e-05	0	1e-05	0	1e-05	0	1e-05	0	1e-05	0	1e-05	0	1e-05	0	1e-05	0	1e-05	0	1e-05	0	2e-05	0	2e-05	0	Lipids
cSQDG160	3e-05	0	4e-05	0	0.00026	0	0.00027	0	0.00041	0	0.00319	0.00318	0.00319	0.00318	0.00319	0.00318	0.00319	0.00318	0.00319	0.00318	0.00319	0.00318	1e-05	0	Lipids
cSQDG161	4e-05	0	5e-05	0	0.00024	0	0.00024	0	0.00033	0	0.00037	0.00036	0.00037	0.00036	0.00037	0.00036	0.00037	0.00036	0.00037	0.00036	0.00037	0.00036	1e-05	0	Lipids
sqdg183:6:9:12	1e-05	0	1e-05	0	1e-05	0	4e-05	0	4e-05	0	4e-05	2e-05	4e-05	2e-05	4e-05	2e-05	4e-05	2e-05	4e-05	2e-05	4e-05	2e-05	1e-05	0	Lipids
cSQDG180	3e-05	0	4e-05	0	7e-05	0	7e-05	0	7e-05	0	7e-05	6e-05	7e-05	6e-05	7e-05	6e-05	7e-05	6e-05	7e-05	6e-05	7e-05	6e-05	1e-05	0	Lipids
sqdg181	4e-05	0	5e-05	0	0.00033	0	0.00033	0	0.00039	0	0.00041	0.0004	0.00041	0.0004	0.00041	0.0004	0.00041	0.0004	0.00041	0.0004	0.00041	0.0004	1e-05	0	Lipids
cSQDG181	3e-05	0	3e-05	0	9e-05	0	0.00012	0	0.00024	0	0.00041	0.0004	0.00041	0.0004	0.00041	0.0004	0.00041	0.0004	0.00041	0.0004	0.00041	0.0004	1e-05	0	Lipids
cSQDG182	4e-05	0	4e-05	0	0.00013	0	0.00013	0	0.00024	0	0.00109	0.00107	0.00109	0.00107	0.00109	0.00107	0.00109	0.00107	0.00109	0.00107	0.00109	0.00107	1e-05	0	Lipids
cSQDG183	1e-05	0	1e-05	0	2e-05	0	5e-05	0	5e-05	0	5e-05	3e-05	5e-05	3e-05	5e-05	3e-05	5e-05	3e-05	5e-05	3e-05	5e-05	3e-05	1e-05	0	Lipids
sqdg184:6:9:12:15	1e-05	0	1e-05	0	1e-05	0	1e-05	0	1e-05	0	1e-05	0	1e-05	0	1e-05	0	1e-05	0	1e-05	0	1e-05	0	1e-05	0	Lipids
CDPDG182	9e-05	0	9e-05	0	0.00069	0	0.00069	0	0.00032	0	1e-05	0	1e-05	0	1e-05	0	1e-05	0	1e-05	0	1e-05	0	1e-05	0	Lipids
CDPDG183	1e-05	0	1e-05	0	2e-05	0	0.00018	0	0.00017	0	1e-05	0	1e-05	0	1e-05	0	1e-05	0	1e-05	0	1e-05	0	1e-05	0	Lipids
cdpdodec9eg	7e-05	0	7e-05	0	7e-05	0	7e-05	0	7e-05	0	1e-05	0	1e-05	0	1e-05	0	1e-05	0	1e-05	0	1e-05	0	1e-05	0	Lipids
cdpdodec6912eg	1e-05	0	1e-05	0	1e-05	0	1e-05	0	1e-05	0	1e-05	0	1e-05	0	1e-05	0	1e-05	0	1e-05	0	1e-05	0	1e-05	0	Lipids
cdpdodec691215eg	1e-05	0	1e-05	0	1e-05	0	1e-05	0	1e-05	0	1e-05	0	1e-05	0	1e-05	0	1e-05	0	1e-05	0	1e-05	0	1e-05	0	Lipids
cpd15309	0.00028	0	0.0003	0	0.00256	0.00129	0.00045	0	0.00026	0	1e-05	0	1e-05	0	1e-05	0	1e-05	0	1e-05	0	1e-05	0	1e-05	0	Lipids
cpd15310	0.00017	0	0.00029	0	0.00044	0	0.00039	0	0.00024	0	1e-05	0	1e-05	0	1e-05	0	1e-05	0	1e-05	0	1e-05	0	1e-05	0	Lipids
cpd15311	8e-05	0	0.00011	0	0.00013	0	0.00013	0	0.0001	0	1e-05	0	1e-05	0	1e-05	0	1e-05	0	1e-05	0	1e-05	0	1e-05	0	Lipids
cpd15312	0.00019	0	0.00032	5e-05	0.00047	0	0.00043	0	0.00029	0	1e-05	0	1e-05	0	1e-05	0	1e-05	0	1e-05	0	1e-05	0	1e-05	0	Lipids
cp_DLiGl	0.0003	0	0.00015	0	0.00013	0	0.00013	0	0.00016	0	1e-05	0	3e-05	0	3e-05	0	3e-05	0	3e-05	0	3e-05	0	1e-05	0	Lipids
cp_DaLGl	1e-05	0	1e-05	0	2e-05	0	8e-05	0	8e-05	0	1e-05	0	2e-05	0	2e-05	0	2e-05	0	2e-05	0	2e-05	0	1e-05	0	Lipids
12dgr181:9	0.00018	0	0.00014	0	0.00011	0	0.00012	0	0.00016	0	1e-05	0	1e-05	0	1e-05	0	1e-05	0	1e-05	0	1e-05	0	1e-05	0	Lipids
12dgr183:6:9:12	1e-05	0	1e-05	0	2e-05	0	0.00021	0	0.00016	0	1e-05	0	1e-05	0	1e-05	0	1e-05	0	1e-05	0	1e-05	0	1e-05	0	Lipids
12dgr184:6:9:12:15	1e-05	0	1e-05	0	1e-05	0	0.00014	0	0.00013	0	1e-05	0	1e-05	0	1e-05	0	1e-05	0	1e-05	0	1e-05	0	1e-05	0	Lipids
cpPGP182	6e-05	0	7e-05	0	0.00024	0	0.0007	0	0.0007	0.00037	0.0007	0.00067	0.0007	0.00045	0.0007	0	0.00069	0	0.00069	0	0.00069	0	1e-05	0	Lipids
cpPGP183	1e-05	0	1e-05	0	2e-05	0	0.00018	0	0.00018	0	0.00018	0.00015	0.00018	0	0.00018	0	0.00018	0	0.00018	0	0.00018	0	1e-05	0	Lipids
cpdPGP181:9	6e-05	0	7e-05	0	7e-05	0	7e-05	0	7e-05	0	5e-05	0	5e-05	0	5e-05	0	5e-05	0	5e-05	0	5e-05	0	1e-05	0	Lipids
pgp183:6:9:12	1e-05	0	1e-05	0	1e-05	0	1e-05	0	1e-05	0	1e-05	0	1e-05	0	1e-05	0	1e-05	0	1e-05	0	1e-05	0	1e-05	0	Lipids
pgp184:6:9:12:15	1e-05	0	1e-05	0	1e-05	0	1e-05	0	1e-05	0	1e-05	0	1e-05	0	1e-05	0	1e-05	0	1e-05	0	1e-05	0	1e-05	0	Lipids
peptido_syn	1e-05	0	3e-05	0	4e-05	0	7e-05	0	0.0031	0	0.00337	0.00334	0.00337	0.00334	0.00337	0.00334	0.00337	0.00334	0.00337	0.00334	0.00337	0.00334	1e-05	0	Lipids
cpd03495	1e-05	0	1e-05	0	2e-05	0	2e-05	0	2e-05	0	2e-05	0	2e-05	0	2e-05	0	2e-05	0	2e-05	0	2e-05	0	1e-05	0	Lipids
cpd00100	1e-05	0	1e-05	0	1e-05	0	1e-05	0	1e-05	0	1e-05	0	1e-05	0	1e-05	0	1e-05	0	1e-05	0	1e-05	0	1e-05	0	Lipids
cpd00160	1e-05	0	1e-05	0	1e-05	0	1e-05	0	1e-05	0	1e-05	0	1e-05	0	1e-05	0	1e-05	0	1e-05	0	1e-05	0	1e-05	0	Lipids
cpd00413	1e-05	0	1e-05	0	1e-05	0	1e-05	0	1e-05	0	1e-05	0	1e-05	0	1e-05	0	1e-05	0	1e-05	0	1e-05	0	1e-05	0	Lipids
cpd02835	0.00365	0.00308	0.00291	0.00226	0.00291	0.00226	0.00291	0.00226	0.00032	0	1e-05	0	1e-05	0	1e-05	0	1e-05	0	1e-05	0	1e-05	0	1e-05	0	Lipids
cpd09410	1e-05	0	1e-05	0	2e-05	0	6e-05	0	9e-05	0	1e-05	0	1e-05	0	1e-05	0	1e-05	0	1e-05	0	1e-05	0	1e-05	0	Lipids
cpd15521	1e-05	0	1e-05	0	1e-05	0	1e-05	0	1e-05	0	1e-05	0	1e-05	0	1e-05	0	1e-05	0	1e-05	0	1e-05	0	1e-05	0	Lipids
cpd15524	0.0081	0.00797	0.00511	0.00494	0.00296	0.0015	0.00348	0.00273	0.00315	0.00278	1e-05	0	1e-05	0	1e-05	0	1e-05	0	1e-05	0	1e-05	0	1e-05	0	Lipids
cpd15525	0.00065	0.00053	0.00045	0.00028	0.00048	2e-05	0.00051	0	0.00037	4e-05	1e-05	0	1e-05	0	1e-05	0	1e-05	0	1e-05	0	1e-05	0	1e-05	0	Lipids
cpd15526	0.00017	6e-05	0.00015	1e-05	0.00016	0	0.00014	0	0.00012	0	1e-05	0	1e-05	0	1e-05	0	1e-05	0	1e-05	0	1e-05	0	1e-05	0	Lipids
cpd15527	0.00054	0.00039	0.00043	0.00021	0.00053	0	0.00048	0	0.00032	1e-05	1e-05	0	1e-05	0	1e-05	0	1e-05	0	1e-05	0	1e-05	0	1e-05	0	Lipids
cpd15418	5e-05	0	5e-05	0	8e-05	0	0.0001	0	9e-05	0	1e-05	0	1e-05	0	1e-05	0	1e-05	0	1e-05	0	1e-05	0	1e-05	0	Lipids
cpd15420	7e-05	0	7e-05	0	0.00013	0	0.00014	0	0.00013	0	1e-05	0	1e-05	0	1e-05	0	1e-05	0	1e-05	0	1e-05	0	1e-05	0	Lipids
cpd15306	1e-05	0	1e-05	0	1e-05	0	1e-05	0	1e-05	0	1e-05	0	1e-05	0	1e-05	0	1e-05	0	1e-05	0	1e-05	0	1e-05	0	Lipids
cpd15417	1e-05	0	1e-05	0	1e-05	0	1e-05	0	1e-05	0	1e-05	0	1e-05	0	1e-05	0	1e-05	0	1e-05	0	1e-05	0	1e-05	0	Lipids
cpd15419	7e-05	0	7e-05	0	0.00049	0	0.00077	0	0.00027	0	1e-05	0	1e-05	0	1e-05	0	1e-05	0	1e-05	0	1e-05	0	1e-05	0	Lipids
cpd15421	4e-05	0	4e-05	0	4e-05	0	4e-05	0	4e-05	0	1e-05	0	1e-05	0	1e-05	0	1e-05	0	1e-05	0	1e-05	0	1e-05	0	Lipids
cpd15511	1e-05	0	1e-05	0	1e-05	0	1e-05	0	1e-05	0	1e-05	0	1e-05	0	1e-05	0	1e-05	0	1e-05	0	1e-05	0	1e-05	0	Lipids
cpd15509	1e-05	0	1e-05	0	1e-05	0	1e-05	0	1e-05	0	1e-05	0	1e-05	0	1e-05	0	1e-05	0	1e-05	0	1e-05	0	1e-05	0	Lipids
cpd15504	1e-05	0	1e-05	0	1e-05	0	1e-05	0	1e-05	0	1e-05	0	1e-05	0	1e-05	0	1e-05	0	1e-05	0	1e-05	0	1e-05	0	Lipids
cpd15542	1e-05	0	1e-05	0	1e-05	0	1e-05	0	1e-05	0	1e-05	0	1e-05	0	1e-05	0	1e-05	0	1e-05	0	1e-05	0	1e-05	0	Lipids
cpd00419	1e-05	0	1e-05	0	1e-05	0	1e-05	0	1e-05	0	1e-05	0	1e-05	0	1e-05	0	1e-05	0	1e-05	0	1e-05	0	1e-05	0	Lipids
cpd03214	0.00015	0	8e-05	0	0.00049	0	0.03722	0.03699	0.01836	0.01825	1e-05	0	1e-05	0	1e-05	0	1e-05	0	1e-05	0	1e-05	0	1e-05	0	Lipids
cpd00008	5e-05	0	5e-05	0	8e-05	0	8e-05	0	0.00016	0	1e-05	0	1.60681	1.6003	1.60681	1.6003	1.60681	1.6003	1.29072	1.28922	0.77039	0.76832	1e-05	0	NDP/NMP
cpd00014	0.00013	0	6e-05	0	0.00013	0	0.00043	0	0.00012	0	1e-05	0	0.00083	0	0.02555	0.02489	0.02555	0.02489	0.02555	0.02489	0.02555	0.02489	0.00371	0.00308	NDP/NMP
cpd00046	3e-05	0	4e-05	0	8e-05	0	0.00022	0	8e-05	0	1e-05	0	1e-05	0	1e-05	0	1e-05	0	1e-05	0	1e-05	0	1e-05	0	NDP/NMP
cpd00096	5e-05	0	5e-05	0	0.00011	0	0.00045	0	0.00016	0	1e-05	0	0.0453	0.04422	0.01993	0.01939	0.01984	0.01944	0.01981	0.01955	0.01979	0.01955	1e-05	0	NDP/NMP
cpd00018	6e-05	0	6e-05	0	9e-05	0	7e-05	0	8e-05	0	1e-05	0	0.00012	0	0.00016	0	0.00016	0	0.00016	0	0.00016	0	2e-05	0	NDP/NMP
cpd00091	0.00011	0	9e-05	0	0.00015	0	0.00022	0	7e-05	0	1e-05	0	1e-05	0	1e-05	0	1e-05	0	1e-05	0	1e-05	0	1e-05	0	NDP/NMP
cpd00031	2e-05	0	2e-05	0	4e-05	0	0.00022	0	0.00016	0	1e-05	0	0.0209	0.02006	0.0209	0.02053	0.0209	0.02058	0.0209	0.02069	0.0209	0.02069	1e-05	0	NDP/NMP
cpd00126	2e-05	0	3e-05	0	4e-05	0	0.00015	0	8e-05	0	1e-05	0	1e-05	0	1e-05	0	1e-05	0	1e-05	0	1e-05	0	1e-05	0	NDP/NMP
cpd00355	1e-05	0	1e-05	0	1e-05	0	2e-05	0	2e-05	0	1e-05	0	1e-05	0	1e-05	0	1e-05	0	1e-05	0	1e-05	0	1e-05	0	Nucleotide
cpd00128	9e-05	0	9e-05	0	5e-05	0	4e-05	0	6e-05	0	1e-05	0	6e-05	0	6e-05	0	6e-05	0	6e-05	0	6e-05	0	9e-05	0	Nucleotide
cpd00182	2e-05	0	2e-05	0	3e-05	0	6e-05	0	8e-05	0	1e-05	0	1e-05	0	1e-05	0	2e-05	0	3e-05	0	4e-05	0	1e-05	0	Nucleotide
cpd00045	3e-05	0	3e-05	0	0.00011	0	0.0001	0	0.00017	0	1e-05	0	1e-05	0	1e-05	0	1e-05	0	1e-05	0	1e-05	0	1e-05	0	Nucleotide
cpd00367	1e-05	0	1e-05	0	1e-05	0	1e-05	0	1e-05	0	1e-05	0	1e-05	0	1e-05	0	1e-05	0	1e-05	0	1e-05	0	1e-05	0	Nucleotide
cpd00092	1e-05	0	1e-05	0	1e-05	0	1e-05	0	1e-05	0	1e-05	0	1e-05	0	1e-05	0	1e-05	0	1e-05	0	1e-05	0	1e-05	0	Nucleotide
cpd00307	1e-05	0	1e-05	0	1e-05	0	1e-05	0	1e-05	0	1e-05	0	1e-05	0	1e-05	0	1e-05	0	1e-05	0	1e-05	0	1e-05	0	Nucleotide
cpd00311	1e-05	0	1e-05	0	1e-05	0	1e-05	0	1e-05	0	1e-05	0	1e-05	0	1e-05	0	1e-05	0	1e-05	0	1e-05	0	1e-05	0	Nucleotide
cpd00184	2e-05	0	2e-05	0	5e-05	0	5e-05	0	3e-05	0	1e-05	0	1e-05	0	1e-05	0	1e-05	0	1e-05	0	1e-05	0	1e-05	0	Nucleotide
cpd00412	4e-05	0	5e-05	0	5e-05	0	3e-05	0	2e-05	0	1e-05	0	1e-05	0	1e-05	0	1e-05	0	1e-05	0	1e-05	0	1e-05	0	Nucleotide
cpd00873	5e-05	0	6e-05	0	0.00029	0	0.00034	0	0.00019	0	1e-05	0	1e-05	0	1e-05	0	1e-05	0	1e-05	0	1e-05	0	1e-05	0	Nucleotide
cpd00130	0.00012	0	0.00017	0	0.00018	0	0.00043	0	0.00024	0	2e-05	0	0.00046	0	0.00018	0	0.00018	0	0.00013	0	0.00013	0	1e-05	0	Organic Acid
cpd00020	20.6085	20.5957	13.887	13.8751	6.77579	6.76746	0.51608	0.49732	0.00012	0	1e-05	0	1.62467	1.59017	6.55946	6.51342	13.218	12.9969	19.6047	19.5734	25.1942	25.1736	28.5964	28.5895	Organic Acid
cpd00061	0.00011	0	7e-05	0	0.00016	0	1.80002	0	0.00047	0	1e-05	0	0.00083	0	0.00036	0	0.00031	0	0.0002	0	0.0002	0	2e-05	0	Organic Acid
cpd00029	2.12891	2.10228	0.24077	0.23729	0.0152	0	0.00037	0	0.00016	0	1e-05	0	0.00012	0	0.00034	0	0.00034	0	0.00036	0	0.00537	0	4.08896	4.08182	Organic Acid
cpd00024	8e-05	0	0.0001	0	0.00041	0	0.00167	0	0.00026	0	1e-05	0	8e-05	0	0.11305	0.07367	0.11305	0	0.00075	0	0.00075	0	4e-05	0	Organic Acid
cpd00426	1e-05	0	1e-05	0	2e-05	0	4e-05	0	6e-05	0	1e-05	0	1e-05	0	1e-05	0	1e-05	0	1e-05	0	1e-05	0	1e-05	0	Organic Acid
cpd00040	4e-05	0	5e-05	0	8e-05	0	0.00016	0	0.00011	0	0.00019	0	0.02292	0	0.02921	0	0.02921	0	0.02333	0	0.01047	0	1e-05	0	Organic Acid
cpd00843	1e-05	0	1e-05	0	1e-05	0	1e-05	0	1e-05	0	1e-05	0	1e-05	0	1e-05	0	1e-05	0	1e-05	0	1e-05	0	1e-05	0	Organic Acid
cpd00032	9e-05	0	0.00016	0	0.00023	0	0.00167	0	0.00584	0	0.00011	0	0.82295	0.81683	0.00018	0	0.00018	0	0.0001	0	0.0001	0	1e-05	0	Organic Acid
cpd00142	1e-05	0	1e-05	0	1e-05	0	1e-05	0	1e-05	0	1e-05	0	1e-05	0	1e-05	0	1e-05	0	1e-05	0	1e-05	0	1e-05	0	Organic Acid
cpd00047	1e-05	0	2e-05	0	3e-05	0	5e-05	0	6e-05	0	1e-05	0	1e-05	0	1e-05	0	1e-05	0	1e-05	0	1e-05	0	1e-05	0	Organic Acid
cpd00145	1e-05	0	1e-05	0	1e-05	0	1e-05	0	1e-05	0	1e-05	0	1e-05	0	1e-05	0	1e-05	0	1e-05	0	1e-05	0	1e-05	0	Organic Acid
cpd00363	1e-05	0	1e-05	0	1e-05	0	1e-05	0	1e-05	0	1e-05	0	1e-05	0	1e-05	0	1e-05	0	1e-05	0	1e-05	0	1e-05	0	Organic Acid
cpd00200	4e-05	0	7e-05	0	0.00015	0	0.00026	0	0.00012	0	1e-05	0	1e-05	0	1e-05	0	1e-05	0	1e-05	0	1e-05	0	1e-05	0	Organic Acid
cpd00331	1e-05	0	1e-05	0	1e-05	0	1e-05	0	1e-05	0	1e-05	0	1e-05	0	1e-05	0	1e-05	0	1e-05	0	1e-05	0	1e-05	0	Organic Acid
cpd01844	1e-05	0	1e-05	0	1e-05	0	1e-05	0	1e-05	0	1e-05	0	1e-05	0	1e-05	0	1e-05	0	1e-05	0	1e-05	0	1e-05	0	Organic Acid
cpd00141	1e-05	0	1e-05	0	1e-05	0	1e-05	0	1e-05	0	1e-05	0	1e-05	0	1e-05	0	1e-05	0	1e-05	0	1e-05	0	1e-05	0	Organic Acid
cpd00219	0.00022	0	6e-05	0	0.00014	0	0.00022	0	0.00015	0	1e-05	0	1e-05	0	1e-05	0	1e-05	0	1e-05	0	1e-05	0	1e-05	0	Organic Acid
cpd01101	1e-05	0	1e-05	0	1e-05	0	1e-05	0	1e-05	0	1e-05	0	1e-05	0	1e-05	0	1e-05	0	1e-05	0	1e-05	0	1e-05	0	Organic Acid
cpd02857	0.00027	0	0.00016	0	0.00052	0	0.00013	0	0.00013	0	1e-05	0	1e-05	0	1e-05	0	1e-05	0	1e-05	0	1e-05	0	1e-05	0	Organic Acid
cpd00282	0.00937	0.00844	0.00937	0.00603	0.00092	0	0.00028	0	6e-05	0	1e-05	0	1e-05	0	1e-05	0	1e-05	0	1e-05	0	1e-05	0	1e-05	0	Organic Acid
cpd00247	0.0004	0	0.00281	0	0.00937	0.00793	0.00053	0	9e-05	0	1e-05	0	1e-05	0	1e-05	0	1e-05	0	1e-05	0	1e-05	0	1e-05	0	Organic Acid
cpd00269	1e-05	0	1e-05	0	1e-05	0	1e-05	0	1e-05	0	1e-05	0	1e-05	0	1e-05	0	1e-05	0	1e-05	0	1e-05	0	1e-05	0	Organic Acid
cpd02333	0.00023	0	0.00034	5e-05	0.00034	4e-05	0.00023	0	0.00034	0	1e-05	0	1e-05	0	1e-05	0	1e-05	0	1e-05	0	1e-05	0	1e-05	0	Organic Acid
cpd05498	1e-05	0	1e-05	0	1e-05	0	1e-05	0	1e-05	0	4e-05	0	2e-05	0	2e-05	0	1e-05	0	1e-05	0	1e-05	0	1e-05	0	Pigment
cpd03148	0.0224	0.02237	0.04188	0.04186	0.06753	0.06752	0.08903	0.089	0.1079	0.10788	0.12668	0.12666	0.12668	0.12665	0.12668	0.12664	0.12668	0.12664	0.12668	0.12663	0.12668	0.1266	1e-05	0	Pigment
cpd08631	1e-05	0	1e-05	0	1e-05	0	2e-05	0	4e-05	0	1e-05	0	1e-05	0	1e-05	0	1e-05	0	1e-05	0	1e-05	0	1e-05	0	Pigment
cpd03215	1e-05	0	1e-05	0	1e-05	0	1e-05	0	1e-05	0	2e-05	0	1e-05	0	1e-05	0	1e-05	0	1e-05	0	1e-05	0	1e-05	0	Pigment
cpd03420	1e-05	0	1e-05	0	1e-05	0	3e-05	0	3e-05	0	1e-05	0	1e-05	0	1e-05	0	1e-05	0	1e-05	0	1e-05	0	1e-05	0	Pigment
cpd03833	1e-05	0	1e-05	0	1e-05	0	3e-05	0	3e-05	0	1e-05	0	1e-05	0	1e-05	0	1e-05	0	1e-05	0	1e-05	0	1e-05	0	Pigment
cpd14598	1e-05	0	1e-05	0	1e-05	0	1e-05	0	1e-05	0	1e-05	0	1e-05	0	1e-05	0	1e-05	0	1e-05	0	1e-05	0	1e-05	0	Pigment
cpd00376	1e-05	0	1e-05	0	1e-05	0	1e-05	0	1e-05	0	1e-05	0	1e-05	0	1e-05	0	1e-05	0	1e-05	0	1e-05	0	1e-05	0	Pigment
cpd00389	1e-05	0	1e-05	0	1e-05	0	1e-05	0	1e-05	0	1e-05	0	1e-05	0	1e-05	0	1e-05	0	1e-05	0	1e-05	0	1e-05	0	Pigment
cpd08632	1e-05	0	1e-05	0	1e-05	0	2e-05	0	3e-05	0	1e-05	0	1e-05	0	1e-05	0	1e-05	0	1e-05	0	1e-05	0	1e-05	0	Pigment
cpd03834	1e-05	0	1e-05	0	1e-05	0	3e-05	0	3e-05	0	1e-05	0	1e-05	0	1e-05	0	1e-05	0	1e-05	0	1e-05	0	1e-05	0	Pigment
cpd00028	1e-05	0	1e-05	0	1e-05	0	2e-05	0	3e-05	0	4e-05	2e-05	4e-05	3e-05	4e-05	3e-05	4e-05	3e-05	4e-05	3e-05	4e-05	3e-05	1e-05	0	Porphyrin
cpd11313	1e-05	0	1e-05	0	1e-05	0	1e-05	0	2e-05	0	3e-05	2e-05	3e-05	2e-05	3e-05	2e-05	3e-05	2e-05	3e-05	2e-05	3e-05	2e-05	1e-05	0	Porphyrin
cpd11312	1e-05	0	1e-05	0	1e-05	0	1e-05	0	2e-05	0	3e-05	3e-05	3e-05	3e-05	3e-05	3e-05	3e-05	3e-05	3e-05	3e-05	3e-05	3e-05	1e-05	0	Porphyrin
cpd02762	1e-05	0	1e-05	0	1e-05	0	2e-05	0	3e-05	0	1e-05	0	1e-05	0	1e-05	0	1e-05	0	1e-05	0	1e-05	0	1e-05	0	Porphyrin
cpd08629	1e-05	0	1e-05	0	1e-05	0	2e-05	0	3e-05	0	1e-05	0	1e-05	0	1e-05	0	1e-05	0	1e-05	0	1e-05	0	1e-05	0	Porphyrin
cpd08630	1e-05	0	1e-05	0	1e-05	0	2e-05	0	3e-05	0	1e-05	0	1e-05	0	1e-05	0	1e-05	0	1e-05	0	1e-05	0	1e-05	0	Porphyrin
cpd00338	4e-05	0	5e-05	0	9e-05	0	8e-05	0	5e-05	0	1e-05	0	1e-05	0	1e-05	0	1e-05	0	1e-05	0	1e-05	0	1e-05	0	Porphyrin
cpd00689	3e-05	0	4e-05	0	0.00013	0	0.0001	0	5e-05	0	1e-05	0	1e-05	0	1e-05	0	1e-05	0	1e-05	0	1e-05	0	1e-05	0	Porphyrin
cpd00755	1e-05	0	1e-05	0	0.00057	0	0.00057	0	0.00057	0	1e-05	0	1e-05	0	1e-05	0	1e-05	0	1e-05	0	1e-05	0	1e-05	0	Porphyrin
cpd01476	1e-05	0	1e-05	0	1e-05	0	2e-05	0	3e-05	0	1e-05	0	1e-05	0	1e-05	0	1e-05	0	1e-05	0	1e-05	0	1e-05	0	Porphyrin
cpd00791	1e-05	0	1e-05	0	1e-05	0	2e-05	0	2e-05	0	1e-05	0	1e-05	0	1e-05	0	1e-05	0	1e-05	0	1e-05	0	1e-05	0	Porphyrin
cpd02216	1e-05	0	1e-05	0	1e-05	0	2e-05	0	3e-05	0	1e-05	0	1e-05	0	1e-05	0	1e-05	0	1e-05	0	1e-05	0	1e-05	0	Porphyrin
cpd11493	1e-05	0	2e-05	0	2e-05	0	2e-05	0	2e-05	0	3e-05	0	3e-05	0	3e-05	0	3e-05	0	3e-05	0	3e-05	0	3e-05	0	Protein
cpd00216	0.00022	0	6e-05	0	0.00014	0	0.00022	0	0.00015	0	4e-05	0	4e-05	0	4e-05	0	4e-05	0	4e-05	0	4e-05	0	1e-05	0	Protein
cpd00042	2e-05	0	2e-05	0	5e-05	0	0.00013	0	0.00014	0	7e-05	0	5e-05	0	5e-05	0	4e-05	0	6e-05	0	8e-05	0	1e-05	0	Protein
cpd00264	1e-05	0	1e-05	0	1e-05	0	1e-05	0	2e-05	0	0.0009	0.00089	0.0009	0.00089	0.0009	0.00089	0.0009	0.00089	0.0009	0.00089	0.0009	0.00089	1e-05	0	Protein
cpd00019	1e-05	0	1e-05	0	1e-05	0	2e-05	0	5e-05	0	9e-05	0	9e-05	0	9e-05	0	9e-05	0	9e-05	0	9e-05	0	1e-05	0	Protein
cpd16898	1e-05	0	1e-05	0	1e-05	0	1e-05	0	1e-05	0	1e-05	0	1e-05	0	1e-05	0	1e-05	0	1e-05	0	1e-05	0	1e-05	0	Protein
cpd_phbg	1e-05	0	1e-05	0	1e-05	0	1e-05	0	1e-05	0	1e-05	0	1e-05	0	1e-05	0	1e-05	0	1e-05	0	1e-05	0	1e-05	0	Protein
cmpd_PHB	1e-05	0	1e-05	0	1e-05	0	1e-05	0	1e-05	0	1e-05	0	1e-05	0	1e-05	0	1e-05	0	1e-05	0	1e-05	0	1e-05	0	Protein
cpd02201	8e-05	0	8e-05	0	8e-05	0	8e-05	0	8e-05	0	1e-05	0	1e-05	0	1e-05	0	1e-05	0	1e-05	0	1e-05	0	1e-05	0	Protein
cpd02666	2e-05	0	2e-05	0	5e-05	0	8e-05	0	8e-05	0	1e-05	0	1e-05	0	1e-05	0	1e-05	0	1e-05	0	1e-05	0	1e-05	0	Protein
cpd00655	2e-05	0	2e-05	0	3e-05	0	7e-05	0	6e-05	0	1e-05	0	1e-05	0	1e-05	0	1e-05	0	1e-05	0	1e-05	0	1e-05	0	Protein
cpd00837	1e-05	0	1e-05	0	1e-05	0	2e-05	0	3e-05	0	1e-05	0	1e-05	0	1e-05	0	1e-05	0	1e-05	0	1e-05	0	1e-05	0	Protein
cpd00135	2e-05	0	2e-05	0	2e-05	0	2e-05	0	4e-05	0	0.00636	0.00626	0.00636	0.00589	0.00636	0	0.00636	0	0.00038	0	0.00019	0	1e-05	0	Protein
cpd00279	1e-05	0	1e-05	0	1e-05	0	1e-05	0	1e-05	0	1e-05	0	1e-05	0	1e-05	0	1e-05	0	1e-05	0	1e-05	0	1e-05	0	Protein
cpd02097	1e-05	0	1e-05	0	1e-05	0	1e-05	0	1e-05	0	1e-05	0	1e-05	0	1e-05	0	1e-05	0	1e-05	0	1e-05	0	1e-05	0	Protein
cpd00858	3e-05	0	3e-05	0	5e-05	0	6e-05	0	5e-05	0	1e-05	0	1e-05	0	1e-05	0	1e-05	0	1e-05	0	1e-05	0	1e-05	0	Protein
cpd00477	2e-05	0	2e-05	0	2e-05	0	2e-05	0	2e-05	0	1e-05	0	1e-05	0	1e-05	0	1e-05	0	1e-05	0	1e-05	0	1e-05	0	Protein
cpd00186	0.00014	0	0.00025	0	5e-05	0	2e-05	0	1e-05	0	1e-05	0	2e-05	0	3e-05	0	3e-05	0	3e-05	0	3e-05	0	3e-05	0	Protein
cpd00281	4e-05	0	4e-05	0	0.00015	0	0.00026	0	7e-05	0	1e-05	0	1e-05	0	1e-05	0	2e-05	0	2e-05	0	3e-05	0	4e-05	0	Protein
cpd00111	1e-05	0	1e-05	0	2e-05	0	0.00205	0.00195	0.00205	0.00195	7e-05	0	7e-05	0	7e-05	0	7e-05	0	7e-05	0	7e-05	0	1e-05	0	Protein
cpd00516	7e-05	0	6e-05	0	4e-05	0	4e-05	0	0.0001	0	0.00056	0	0.00056	0	0.00056	0	0.00056	0	0.00056	0	0.00056	0	1e-05	0	Protein
cpd01155	1e-05	0	1e-05	0	1e-05	0	1e-05	0	1e-05	0	1e-05	0	1e-05	0	1e-05	0	1e-05	0	1e-05	0	1e-05	0	1e-05	0	Protein
cpd01977	0.00014	0	0.00023	0	0.00055	0	0.02996	0.02952	0.01585	0.01565	1e-05	0	1e-05	0	1e-05	0	1e-05	0	1e-05	0	1e-05	0	1e-05	0	Protein
cpd00085	0.00367	0	0.0028	0	0.00025	0	0.00017	0	0.0002	0	1e-05	0	2e-05	0	2e-05	0	2e-05	0	2e-05	0	2e-05	0	2e-05	0	Protein
cpd01017	1e-05	0	1e-05	0	2e-05	0	2e-05	0	5e-05	0	0.00406	0.00389	0.00406	0.00389	0.00406	0.00389	0.00406	0.00389	0.00406	0.00389	0.00406	0.00389	1e-05	0	Protein
cpd00506	2e-05	0	2e-05	0	5e-05	0	6e-05	0	4e-05	0	1e-05	0	1e-05	0	1e-05	0	1e-05	0	1e-05	0	1e-05	0	1e-05	0	Protein
cpd00064	7e-05	0	4e-05	0	6e-05	0	6e-05	0	4e-05	0	1e-05	0	1e-05	0	1e-05	0	1e-05	0	1e-05	0	1e-05	0	1e-05	0	Protein
cpd00274	0.00285	0	0.0007	0	0.00017	0	6e-05	0	3e-05	0	1e-05	0	1e-05	0	1e-05	0	1e-05	0	1e-05	0	1e-05	0	1e-05	0	Protein
cpd00152	1e-05	0	1e-05	0	2e-05	0	3e-05	0	5e-05	0	7e-05	0	7e-05	0	7e-05	0	7e-05	0	7e-05	0	7e-05	0	1e-05	0	Protein
cpd00722	2e-05	0	3e-05	0	0.00013	0	0.00029	0	0.00018	0	1e-05	0	1e-05	0	1e-05	0	1e-05	0	1e-05	0	1e-05	0	1e-05	0	Protein
cpd00359	1e-05	0	1e-05	0	2e-05	0	4e-05	0	4e-05	0	6e-05	0	3e-05	0	2e-05	0	2e-05	0	2e-05	0	1e-05	0	1e-05	0	Protein
cpd00351	1e-05	0	1e-05	0	1e-05	0	1e-05	0	1e-05	0	1e-05	0	1e-05	0	1e-05	0	1e-05	0	1e-05	0	1e-05	0	1e-05	0	Protein
cpd00616	1e-05	0	1e-05	0	1e-05	0	1e-05	0	1e-05	0	1e-05	0	1e-05	0	1e-05	0	1e-05	0	1e-05	0	1e-05	0	1e-05	0	Protein
cpd01693	1e-05	0	1e-05	0	1e-05	0	1e-05	0	1e-05	0	1e-05	0	1e-05	0	1e-05	0	1e-05	0	1e-05	0	1e-05	0	1e-05	0	Protein
cpd00706	1e-05	0	1e-05	0	2e-05	0	4e-05	0	3e-05	0	1e-05	0	1e-05	0	1e-05	0	1e-05	0	1e-05	0	1e-05	0	1e-05	0	Protein
cpd01504	1e-05	0	1e-05	0	1e-05	0	1e-05	0	1e-05	0	1e-05	0	1e-05	0	1e-05	0	1e-05	0	1e-05	0	1e-05	0	1e-05	0	Protein
cpd02152	0.36984	0.36144	0.36984	0.36312	0.36984	0.36335	0.36984	0.36335	0.36984	0.36335	0.01835	0.01827	0.01835	0.01827	0.01835	0.01827	0.01835	0.01827	0.01835	0.01827	0.01835	0.01823	1e-05	0	Protein
cpd00731	0.00337	0.00327	0.00314	0.00232	0.0001	0	4e-05	0	2e-05	0	1e-05	0	1e-05	0	1e-05	0	1e-05	0	1e-05	0	1e-05	0	1e-05	0	Protein
cpd01758	1e-05	0	1e-05	0	1e-05	0	2e-05	0	3e-05	0	1e-05	0	1e-05	0	1e-05	0	1e-05	0	1e-05	0	1e-05	0	1e-05	0	Protein
cpd00641	1e-05	0	1e-05	0	2e-05	0	5e-05	0	0.00011	0	1e-05	0	1e-05	0	1e-05	0	1e-05	0	1e-05	0	1e-05	0	1e-05	0	Protein
cpd01324	1e-05	0	1e-05	0	2e-05	0	6e-05	0	0.00018	0	1e-05	0	1e-05	0	1e-05	0	1e-05	0	1e-05	0	1e-05	0	1e-05	0	Protein
cpd00120	1e-05	0	1e-05	0	1e-05	0	1e-05	0	1e-05	0	1e-05	0	1e-05	0	1e-05	0	1e-05	0	1e-05	0	1e-05	0	1e-05	0	Protein
cpd03123	1e-05	0	1e-05	0	1e-05	0	1e-05	0	1e-05	0	1e-05	0	1e-05	0	1e-05	0	1e-05	0	1e-05	0	1e-05	0	1e-05	0	Protein
cpd00424	1e-05	0	1e-05	0	1e-05	0	1e-05	0	1e-05	0	1e-05	0	1e-05	0	1e-05	0	1e-05	0	1e-05	0	1e-05	0	1e-05	0	Protein
cpd00790	0.00728	0.00712	0.00728	0.00718	0.00728	0.0072	0.00728	0.00722	0.00728	0.00723	1e-05	0	1e-05	0	1e-05	0	1e-05	0	1e-05	0	1e-05	0	1e-05	0	Protein
cpd00136	1e-05	0	1e-05	0	1e-05	0	1e-05	0	1e-05	0	1e-05	0	1e-05	0	1e-05	0	1e-05	0	1e-05	0	1e-05	0	1e-05	0	Protein
cpd02476	1e-05	0	1e-05	0	1e-05	0	1e-05	0	1e-05	0	1e-05	0	1e-05	0	1e-05	0	1e-05	0	1e-05	0	1e-05	0	1e-05	0	Protein
cpd00809	0.00011	0	8e-05	0	0.0001	0	0.00016	0	0.01257	0.01226	1e-05	0	1e-05	0	1e-05	0	1e-05	0	1e-05	0	1e-05	0	1e-05	0	Protein
cpd00162	1e-05	0	1e-05	0	1e-05	0	1e-05	0	1e-05	0	1e-05	0	1e-05	0	1e-05	0	1e-05	0	1e-05	0	1e-05	0	1e-05	0	Protein
cpd00658	3e-05	0	3e-05	0	6e-05	0	0.00011	0	0.00015	0	1e-05	0	1e-05	0	1e-05	0	1e-05	0	1e-05	0	1e-05	0	1e-05	0	Protein
cpd00227	0.00018	0	0.00014	0	0.00011	0	0.00012	0	0.00016	0	2e-05	0	1e-05	0	1e-05	0	1e-05	0	1e-05	0	1e-05	0	1e-05	0	Protein
cpd00342	2e-05	0	2e-05	0	2e-05	0	2e-05	0	2e-05	0	2e-05	0	2e-05	0	2e-05	0	2e-05	0	2e-05	0	2e-05	0	1e-05	0	Protein
cpd00452	1e-05	0	1e-05	0	3e-05	0	9e-05	0	8e-05	0	3e-05	0	3e-05	0	3e-05	0	3e-05	0	3e-05	0	2e-05	0	2e-05	0	Protein
cpd02991	1e-05	0	2e-05	0	3e-05	0	8e-05	0	8e-05	0	1e-05	0	1e-05	0	1e-05	0	1e-05	0	1e-05	0	1e-05	0	1e-05	0	Protein
cpd02886	2e-05	0	0.00037	0	4e-05	0	3e-05	0	3e-05	0	1e-05	0	1e-05	0	1e-05	0	1e-05	0	1e-05	0	1e-05	0	1e-05	0	Protein
cpd02968	1e-05	0	0.00104	0.00022	0.00337	0.00326	0.00337	0.00329	0.00337	0.00027	1e-05	0	1e-05	0	1e-05	0	1e-05	0	1e-05	0	1e-05	0	1e-05	0	Protein
cpd11494	1e-05	0	2e-05	0	3e-05	0	2e-05	0	3e-05	0	2e-05	0	3e-05	0	3e-05	0	3e-05	0	3e-05	0	3e-05	0	1e-05	0	Protein
cpd01695	5e-05	0	5e-05	0	5e-05	0	7e-05	0	5e-05	0	1e-05	0	1e-05	0	1e-05	0	1e-05	0	1e-05	0	1e-05	0	1e-05	0	Protein
cpd00635	1e-05	0	1e-05	0	1e-05	0	1e-05	0	1e-05	0	1e-05	0	1e-05	0	1e-05	0	1e-05	0	1e-05	0	1e-05	0	1e-05	0	Protein
cpd16757	1e-05	0	1e-05	0	1e-05	0	1e-05	0	1e-05	0	1e-05	0	1e-05	0	1e-05	0	1e-05	0	1e-05	0	1e-05	0	1e-05	0	Protein
cpd11908	4.09094	4.07168	4.01459	3.99533	1.10543	1.08107	9e-05	0	6e-05	0	1e-05	0	0.0001	0	7e-05	0	0.00034	0	0.21261	0.19313	1.92806	1.90857	4.17402	4.15476	RNA
cpd12829	0.08324	0.08256	0.1598	0.1588	0.28203	0.26206	0.31331	0.29334	0.00057	0	1e-05	0	3.71212	3.70138	4.17402	4.15476	4.17402	4.15476	3.9623	3.9611	2.2481	2.24566	3e-05	0	RNA
cpd12313	0.0002	0	0.00019	0	2.81391	2.78561	3.86485	3.85392	4.17402	4.15476	4.17402	4.15476	0.46244	0.45029	0.00012	0	9e-05	0	6e-05	0	4e-05	0	1e-05	0	RNA
cpd11910	1e-05	0	1e-05	0	1e-05	0	1e-05	0	1e-05	0	1e-05	0	1e-05	0	1e-05	0	1e-05	0	1e-05	0	1e-05	0	1e-05	0	RNA
cpd01420	1e-05	0	1e-05	0	1e-05	0	1e-05	0	1e-05	0	0.0002	0	0.00019	0	0.00018	0	0.00018	0	0.00018	0	0.00018	0	1e-05	0	Terpene
cpd03637	1e-05	0	1e-05	0	1e-05	0	1e-05	0	1e-05	0	9e-05	4e-05	9e-05	6e-05	9e-05	7e-05	9e-05	7e-05	9e-05	7e-05	9e-05	7e-05	1e-05	0	Terpene
cpd05499	1e-05	0	1e-05	0	1e-05	0	1e-05	0	1e-05	0	9e-05	8e-05	9e-05	8e-05	9e-05	8e-05	9e-05	8e-05	9e-05	8e-05	9e-05	8e-05	1e-05	0	Terpene
cpd03220	1e-05	0	1e-05	0	1e-05	0	1e-05	0	1e-05	0	0.00041	0	0.0004	0	0.0004	0	0.0004	0	0.0004	0	0.0004	0	1e-05	0	Terpene
cpd03217	1e-05	0	1e-05	0	1e-05	0	1e-05	0	1e-05	0	0.00041	0	0.0004	0	0.0004	0	0.0004	0	0.0004	0	0.0004	0	1e-05	0	Terpene
cpd02172	1e-05	0	1e-05	0	1e-05	0	1e-05	0	1e-05	0	1e-05	0	1e-05	0	1e-05	0	1e-05	0	1e-05	0	1e-05	0	1e-05	0	Terpene
cpd_msbq	1e-05	0	1e-05	0	1e-05	0	1e-05	0	1e-05	0	1e-05	0	1e-05	0	1e-05	0	1e-05	0	1e-05	0	1e-05	0	1e-05	0	Terpene
cpd16336	1e-05	0	1e-05	0	1e-05	0	1e-05	0	1e-05	0	1e-05	0	1e-05	0	1e-05	0	1e-05	0	1e-05	0	1e-05	0	1e-05	0	Terpene
cpd08301	1e-05	0	2e-05	0	3e-05	0	6e-05	0	0.00024	0	1e-05	0	1e-05	0	1e-05	0	1e-05	0	1e-05	0	1e-05	0	1e-05	0	Terpene
cpd08615	1e-05	0	2e-05	0	3e-05	0	5e-05	0	0.00012	0	1e-05	0	1e-05	0	1e-05	0	1e-05	0	1e-05	0	1e-05	0	1e-05	0	Terpene
cpd03205	1e-05	0	1e-05	0	1e-05	0	1e-05	0	1e-05	0	3e-05	0	2e-05	0	1e-05	0	1e-05	0	1e-05	0	1e-05	0	1e-05	0	Terpene
cpd03206	1e-05	0	1e-05	0	1e-05	0	1e-05	0	1e-05	0	3e-05	0	1e-05	0	1e-05	0	1e-05	0	1e-05	0	1e-05	0	1e-05	0	Terpene
cpd00202	2e-05	0	2e-05	0	3e-05	0	4e-05	0	8e-05	0	1e-05	0	1e-05	0	1e-05	0	1e-05	0	1e-05	0	1e-05	0	1e-05	0	Terpene
cpd03211	1e-05	0	1e-05	0	1e-05	0	1e-05	0	1e-05	0	1e-05	0	1e-05	0	1e-05	0	1e-05	0	1e-05	0	1e-05	0	1e-05	0	Terpene
cpd00350	1e-05	0	1e-05	0	1e-05	0	2e-05	0	3e-05	0	1e-05	0	1e-05	0	1e-05	0	1e-05	0	1e-05	0	1e-05	0	1e-05	0	Terpene
cpd02169	1e-05	0	1e-05	0	1e-05	0	1e-05	0	1e-05	0	1e-05	0	1e-05	0	1e-05	0	1e-05	0	1e-05	0	1e-05	0	1e-05	0	Terpene
cpd00113	2e-05	0	2e-05	0	3e-05	0	4e-05	0	8e-05	0	1e-05	0	1e-05	0	1e-05	0	1e-05	0	1e-05	0	1e-05	0	1e-05	0	Terpene
cpd00283	1e-05	0	1e-05	0	1e-05	0	2e-05	0	5e-05	0	1e-05	0	1e-05	0	1e-05	0	1e-05	0	1e-05	0	1e-05	0	1e-05	0	Terpene
cpd00289	1e-05	0	1e-05	0	1e-05	0	1e-05	0	3e-05	0	1e-05	0	1e-05	0	1e-05	0	1e-05	0	1e-05	0	1e-05	0	1e-05	0	Terpene
cpd02168	1e-05	0	1e-05	0	1e-05	0	1e-05	0	1e-05	0	1e-05	0	1e-05	0	1e-05	0	1e-05	0	1e-05	0	1e-05	0	1e-05	0	Terpene
cpd00559	1e-05	0	1e-05	0	1e-05	0	1e-05	0	1e-05	0	1e-05	0	1e-05	0	1e-05	0	1e-05	0	1e-05	0	1e-05	0	1e-05	0	Terpene
cpd00022	2e-05	0	2e-05	0	5e-05	0	0.0001	0	0.0001	0	6e-05	0	8e-05	0	8e-05	0	8e-05	0	8e-05	0	8e-05	0	1e-05	0	Vitamins and Cofactors
cpd00070	2e-05	0	2e-05	0	5e-05	0	9e-05	0	9e-05	0	6e-05	0	6e-05	0	6e-05	0	6e-05	0	6e-05	0	6e-05	0	1e-05	0	Vitamins and Cofactors
cpd00010	1e-05	0	2e-05	0	3e-05	0	8e-05	0	8e-05	0	8e-05	0	8e-05	0	7e-05	0	7e-05	0	7e-05	0	7e-05	0	1e-05	0	Vitamins and Cofactors
cpd00220	1e-05	0	1e-05	0	1e-05	0	2e-05	0	2e-05	0	4e-05	2e-05	4e-05	2e-05	4e-05	2e-05	4e-05	2e-05	4e-05	2e-05	4e-05	2e-05	1e-05	0	Vitamins and Cofactors
cpd00166	1e-05	0	1e-05	0	1e-05	0	1e-05	0	3e-05	0	3e-05	2e-05	3e-05	2e-05	3e-05	2e-05	3e-05	2e-05	3e-05	2e-05	3e-05	2e-05	1e-05	0	Vitamins and Cofactors
cpd00201	1e-05	0	1e-05	0	2e-05	0	4e-05	0	9e-05	0	3e-05	0	3e-05	0	3e-05	0	3e-05	0	3e-05	0	4e-05	0	1e-05	0	Vitamins and Cofactors
cpd00087	1e-05	0	1e-05	0	2e-05	0	3e-05	0	5e-05	0	0.00013	0	0.00013	0	0.00013	0	0.00013	0	0.00012	0	0.00012	0	1e-05	0	Vitamins and Cofactors
cpd00017	1e-05	0	1e-05	0	1e-05	0	2e-05	0	4e-05	0	4e-05	2e-05	4e-05	2e-05	4e-05	2e-05	4e-05	2e-05	4e-05	2e-05	4e-05	2e-05	1e-05	0	Vitamins and Cofactors
cpd00015	1e-05	0	1e-05	0	1e-05	0	2e-05	0	3e-05	0	4e-05	1e-05	4e-05	0	4e-05	0	4e-05	0	4e-05	0	4e-05	0	1e-05	0	Vitamins and Cofactors
cpd00125	1e-05	0	1e-05	0	2e-05	0	3e-05	0	7e-05	0	0.00013	0	0.00013	0	0.00013	0	0.00013	0	0.00012	0	0.00012	0	1e-05	0	Vitamins and Cofactors
cpd00345	1e-05	0	1e-05	0	2e-05	0	4e-05	0	7e-05	0	2e-05	0	0.00013	0	0.00013	0	0.00013	0	0.00012	0	0.00012	0	1e-05	0	Vitamins and Cofactors
cpd00078	1e-05	0	2e-05	0	3e-05	0	8e-05	0	8e-05	0	8e-05	0	7e-05	0	5e-05	0	5e-05	0	4e-05	0	4e-05	0	1e-05	0	Vitamins and Cofactors
cpd01631	1e-05	0	1e-05	0	1e-05	0	3e-05	0	4e-05	0	1e-05	0	1e-05	0	1e-05	0	1e-05	0	1e-05	0	1e-05	0	1e-05	0	Vitamins and Cofactors
cpd01628	1e-05	0	1e-05	0	1e-05	0	3e-05	0	4e-05	0	4e-05	2e-05	4e-05	2e-05	4e-05	2e-05	4e-05	2e-05	4e-05	2e-05	4e-05	2e-05	1e-05	0	Vitamins and Cofactors
cpd09850	1e-05	0	1e-05	0	2e-05	0	3e-05	0	3e-05	0	4e-05	0	4e-05	0	4e-05	0	4e-05	0	4e-05	0	4e-05	0	1e-05	0	Vitamins and Cofactors
cpd09851	1e-05	0	1e-05	0	1e-05	0	1e-05	0	1e-05	0	1e-05	0	1e-05	0	1e-05	0	1e-05	0	1e-05	0	1e-05	0	1e-05	0	Vitamins and Cofactors
cpd01401	1e-05	0	1e-05	0	1e-05	0	4e-05	0	7e-05	0	0.00022	0.00021	0.00022	0.00021	0.00022	0.00021	0.00022	0.00021	0.00022	0.00021	0.00022	0.00021	1e-05	0	Vitamins and Cofactors
cpd03914	1e-05	0	1e-05	0	1e-05	0	2e-05	0	3e-05	0	1e-05	0	1e-05	0	1e-05	0	1e-05	0	1e-05	0	1e-05	0	1e-05	0	Vitamins and Cofactors
cpd03915	1e-05	0	1e-05	0	1e-05	0	2e-05	0	3e-05	0	1e-05	0	1e-05	0	1e-05	0	1e-05	0	1e-05	0	1e-05	0	1e-05	0	Vitamins and Cofactors
cpd00056	1e-05	0	1e-05	0	1e-05	0	1e-05	0	1e-05	0	1e-05	0	1e-05	0	1e-05	0	1e-05	0	1e-05	0	1e-05	0	1e-05	0	Vitamins and Cofactors
cpd02656	1e-05	0	1e-05	0	1e-05	0	2e-05	0	3e-05	0	1e-05	0	1e-05	0	1e-05	0	1e-05	0	1e-05	0	1e-05	0	1e-05	0	Vitamins and Cofactors
cpd02882	1e-05	0	1e-05	0	1e-05	0	2e-05	0	3e-05	0	1e-05	0	1e-05	0	1e-05	0	1e-05	0	1e-05	0	1e-05	0	1e-05	0	Vitamins and Cofactors
cpd00133	1e-05	0	1e-05	0	1e-05	0	1e-05	0	2e-05	0	1e-05	0	1e-05	0	1e-05	0	1e-05	0	1e-05	0	1e-05	0	1e-05	0	Vitamins and Cofactors
cpd00050	1e-05	0	1e-05	0	1e-05	0	2e-05	0	3e-05	0	1e-05	0	1e-05	0	1e-05	0	1e-05	0	1e-05	0	1e-05	0	1e-05	0	Vitamins and Cofactors
cpd00493	1e-05	0	1e-05	0	1e-05	0	1e-05	0	1e-05	0	1e-05	0	1e-05	0	1e-05	0	1e-05	0	1e-05	0	1e-05	0	1e-05	0	Vitamins and Cofactors
cpd00016	1e-05	0	1e-05	0	1e-05	0	1e-05	0	1e-05	0	1e-05	0	1e-05	0	1e-05	0	1e-05	0	1e-05	0	1e-05	0	1e-05	0	Vitamins and Cofactors
cpd00478	1e-05	0	1e-05	0	1e-05	0	1e-05	0	1e-05	0	1e-05	0	1e-05	0	1e-05	0	1e-05	0	1e-05	0	1e-05	0	1e-05	0	Vitamins and Cofactors
cpd00957	1e-05	0	1e-05	0	1e-05	0	2e-05	0	5e-05	0	1e-05	0	1e-05	0	1e-05	0	1e-05	0	1e-05	0	1e-05	0	1e-05	0	Vitamins and Cofactors
cpd00044	2e-05	0	3e-05	0	5e-05	0	6e-05	0	9e-05	0	1e-05	0	1e-05	0	1e-05	0	1e-05	0	1e-05	0	1e-05	0	1e-05	0	Vitamins and Cofactors
cpd00793	1e-05	0	1e-05	0	1e-05	0	1e-05	0	1e-05	0	1e-05	0	1e-05	0	1e-05	0	1e-05	0	1e-05	0	1e-05	0	1e-05	0	Vitamins and Cofactors
cpd00330	1e-05	0	1e-05	0	2e-05	0	3e-05	0	7e-05	0	0.00012	0	0.00013	0	0.00013	0	0.00013	0	0.00012	0	0.00012	0	1e-05	0	Vitamins and Cofactors
cpd00093	1e-05	0	2e-05	0	4e-05	0	4e-05	0	8e-05	0	1e-05	0	1e-05	0	1e-05	0	1e-05	0	1e-05	0	1e-05	0	1e-05	0	Vitamins and Cofactors
cpd00347	1e-05	0	1e-05	0	2e-05	0	4e-05	0	9e-05	0	1e-05	0	4e-05	0	4e-05	0	4e-05	0	4e-05	0	4e-05	0	1e-05	0	Vitamins and Cofactors
cpd00857	1e-05	0	1e-05	0	1e-05	0	1e-05	0	1e-05	0	1e-05	0	1e-05	0	1e-05	0	1e-05	0	1e-05	0	1e-05	0	1e-05	0	Vitamins and Cofactors
cpd00215	1e-05	0	1e-05	0	1e-05	0	1e-05	0	1e-05	0	1e-05	0	1e-05	0	1e-05	0	1e-05	0	1e-05	0	1e-05	0	1e-05	0	Vitamins and Cofactors
cpd00233	1e-05	0	1e-05	0	1e-05	0	1e-05	0	1e-05	0	1e-05	0	1e-05	0	1e-05	0	1e-05	0	1e-05	0	1e-05	0	1e-05	0	Vitamins and Cofactors
cpd00305	1e-05	0	1e-05	0	1e-05	0	1e-05	0	1e-05	0	1e-05	0	1e-05	0	1e-05	0	1e-05	0	1e-05	0	1e-05	0	1e-05	0	Vitamins and Cofactors
cpd02197	1e-05	0	1e-05	0	1e-05	0	3e-05	0	4e-05	0	1e-05	0	1e-05	0	1e-05	0	1e-05	0	1e-05	0	1e-05	0	1e-05	0	Vitamins and Cofactors
cpd03918	1e-05	0	1e-05	0	1e-05	0	1e-05	0	1e-05	0	1e-05	0	1e-05	0	1e-05	0	1e-05	0	1e-05	0	1e-05	0	1e-05	0	Vitamins and Cofactors
cpd03919	1e-05	0	1e-05	0	1e-05	0	1e-05	0	3e-05	0	1e-05	0	1e-05	0	1e-05	0	1e-05	0	1e-05	0	1e-05	0	1e-05	0	Vitamins and Cofactors
cpd03920	1e-05	0	1e-05	0	1e-05	0	1e-05	0	3e-05	0	1e-05	0	1e-05	0	1e-05	0	1e-05	0	1e-05	0	1e-05	0	1e-05	0	Vitamins and Cofactors
cpd03423	1e-05	0	1e-05	0	1e-05	0	2e-05	0	3e-05	0	1e-05	0	1e-05	0	1e-05	0	1e-05	0	1e-05	0	1e-05	0	1e-05	0	Vitamins and Cofactors
cpd03422	1e-05	0	1e-05	0	1e-05	0	1e-05	0	1e-05	0	1e-05	0	1e-05	0	1e-05	0	1e-05	0	1e-05	0	1e-05	0	1e-05	0	Vitamins and Cofactors
cpd00446	1e-05	0	1e-05	0	1e-05	0	1e-05	0	1e-05	0	1e-05	0	1e-05	0	1e-05	0	1e-05	0	1e-05	0	1e-05	0	1e-05	0	Others
cpd00251	1e-05	0	1e-05	0	1e-05	0	2e-05	0	2e-05	0	1e-05	0	1e-05	0	1e-05	0	1e-05	0	1e-05	0	1e-05	0	1e-05	0	Others
cpd00924	3e-05	0	3e-05	0	7e-05	0	0.0001	0	0.0128	0.01208	4e-05	0	4e-05	0	3e-05	0	2e-05	0	2e-05	0	2e-05	0	1e-05	0	Others
cpd00114	0.00021	0	8e-05	0	5e-05	0	0.00016	0	5e-05	0	1e-05	0	0.0001	0	0.00125	0	0.00163	0	0.317	0.21041	0.83807	0.63074	1.58514	1.52822	Others
cpd00037	1e-05	0	5e-05	0	0.00017	0	0.00196	0.00165	0.00339	0.00027	2e-05	0	2e-05	0	2e-05	0	2e-05	0	2e-05	0	2e-05	0	2e-05	0	Others
cpd00697	1e-05	0	1e-05	0	1e-05	0	1e-05	0	1e-05	0	1e-05	0	1e-05	0	1e-05	0	1e-05	0	1e-05	0	1e-05	0	1e-05	0	Others
cpd03470	0.00011	0	0.00018	0	0.00013	0	5e-05	0	4e-05	0	1e-05	0	1e-05	0	1e-05	0	1e-05	0	1e-05	0	1e-05	0	1e-05	0	Others
cpd00090	1e-05	0	1e-05	0	1e-05	0	2e-05	0	2e-05	0	1e-05	0	1e-05	0	1e-05	0	1e-05	0	1e-05	0	1e-05	0	1e-05	0	Others
cpd00810	0.00401	0.00323	0.01652	0.01584	0.02663	0.02552	0.00125	0	0.00014	0	1e-05	0	1e-05	0	1e-05	0	1e-05	0	1e-05	0	1e-05	0	1e-05	0	Others
cpd01775	2e-05	0	3e-05	0	8e-05	0	0.00047	0	0.0058	0.00503	1e-05	0	1e-05	0	1e-05	0	1e-05	0	1e-05	0	1e-05	0	1e-05	0	Others
cpd02375	1.58514	1.57863	1.58514	1.57863	1.58514	1.57863	1.61308	1.60651	1.39728	1.38802	1e-05	0	1e-05	0	1e-05	0	1e-05	0	1e-05	0	1e-05	0	1e-05	0	Others
cpd00497	4e-05	0	5e-05	0	5e-05	0	0.00021	0	7e-05	0	1e-05	0	1e-05	0	1e-05	0	1e-05	0	1e-05	0	1e-05	0	1e-05	0	Others
cpd00005	1e-05	0	2e-05	0	5e-05	0	7e-05	0	7e-05	0	7e-05	5e-05	7e-05	0	7e-05	0	7e-05	0	7e-05	0	7e-05	0	1e-05	0	Others
cpd00006	1e-05	0	2e-05	0	6e-05	0	7e-05	0	7e-05	0	1e-05	0	7e-05	0	7e-05	0	7e-05	0	7e-05	0	7e-05	0	1e-05	0	Others
cpd00004	1e-05	0	2e-05	0	6e-05	0	0.00017	0	0.00025	0	0.00025	0.00022	0.00022	0	0.00018	0	0.00018	0	0.00025	0	0.00025	0	1e-05	0	Others
cpd00003	1e-05	0	2e-05	0	6e-05	0	0.00026	0	0.00031	0	2e-05	0	0.00025	3e-05	0.00025	6e-05	0.00025	6e-05	0.00025	0	0.00025	0	1e-05	0	Others
cpd00357	2e-05	0	3e-05	0	0.00015	0	0.00353	0.00307	0.00353	0.00339	0.00353	0.00351	0.00353	0.00351	0.00353	0.00351	0.00353	0.00351	0.00353	0.00351	0.00353	0.00351	1e-05	0	Others
cpd00068	1e-05	0	1e-05	0	2e-05	0	2e-05	0	3e-05	0	1e-05	0	1e-05	0	1e-05	0	1e-05	0	1e-05	0	1e-05	0	1e-05	0	Others
cpd00012	8e-05	0	8e-05	0	0.00012	0	0.00013	0	0.00028	0	1e-05	0	0.00012	0	0.00125	0	0.00163	0	0.317	0.31041	0.83807	0.83074	1.66928	1.66277	Others
cpfdxr22	1e-05	0	1e-05	0	1e-05	0	1e-05	0	1e-05	0	1e-05	0	1e-05	0	1e-05	0	1e-05	0	1e-05	0	1e-05	0	1e-05	0	Others
cpfdxo22	1e-05	0	1e-05	0	1e-05	0	1e-05	0	1e-05	0	1e-05	0	1e-05	0	1e-05	0	1e-05	0	1e-05	0	1e-05	0	1e-05	0	Others
cpd11420	1e-05	0	1e-05	0	1e-05	0	1e-05	0	1e-05	0	1e-05	0	1e-05	0	1e-05	0	1e-05	0	1e-05	0	1e-05	0	1e-05	0	Others
cpd11421	1e-05	0	1e-05	0	1e-05	0	1e-05	0	1e-05	0	1e-05	0	1e-05	0	1e-05	0	1e-05	0	1e-05	0	1e-05	0	1e-05	0	Others
cpd00025	2e-05	0	2e-05	0	3e-05	0	5e-05	0	5e-05	0	3e-05	0	0.00017	0	0.85694	0.81816	0.85694	0.81816	0.96673	0.94518	2.60539	2.58385	4.7342	4.71174	Others
cpd00073	1e-05	0	1e-05	0	2e-05	0	2e-05	0	6e-05	0	4e-05	0	4e-05	0	3e-05	0	3e-05	0	3e-05	0	3e-05	0	1e-05	0	Others
cpd00146	3.33174	3.31873	1.28453	1.25774	0.00016	0	0.00013	0	0.01027	0	0.00036	0	0.32423	0.31713	0.00012	0	0.00011	0	9e-05	0	9e-05	0	1e-05	0	Others
cpd00638	2e-05	0	3e-05	0	0.0001	0	0.00032	0	0.00031	0	1e-05	0	1e-05	0	1e-05	0	1e-05	0	1e-05	0	1e-05	0	1e-05	0	Others
cpd00103	7e-05	0	6e-05	0	0.00016	0	0.01182	0.01082	0.00597	0.00519	1e-05	0	1e-05	0	1e-05	0	1e-05	0	1e-05	0	1e-05	0	1e-05	0	Others
cpd00492	1e-05	0	1e-05	0	1e-05	0	1e-05	0	1e-05	0	1e-05	0	1e-05	0	1e-05	0	1e-05	0	1e-05	0	1e-05	0	1e-05	0	Others
cpd02611	1e-05	0	9e-05	0	0.00018	0	0.00013	0	0.00064	0	2e-05	0	2e-05	0	2e-05	0	2e-05	0	2e-05	0	2e-05	0	2e-05	0	Others
cpd00861	1e-05	0	1e-05	0	1e-05	0	1e-05	0	1e-05	0	1e-05	0	1e-05	0	1e-05	0	1e-05	0	1e-05	0	1e-05	0	1e-05	0	Others
cpd02978	1e-05	0	1e-05	0	2e-05	0	5e-05	0	0.00012	0	1e-05	0	1e-05	0	1e-05	0	1e-05	0	1e-05	0	1e-05	0	1e-05	0	Others
cpd00193	2e-05	0	3e-05	0	5e-05	0	5e-05	0	6e-05	0	1e-05	0	4e-05	0	4e-05	0	4e-05	0	4e-05	0	4e-05	0	2e-05	0	Others
cpd03450	1e-05	0	1e-05	0	1e-05	0	1e-05	0	1e-05	0	1e-05	0	1e-05	0	1e-05	0	1e-05	0	1e-05	0	1e-05	0	1e-05	0	Others
cpd02820	1e-05	0	5e-05	0	4e-05	0	1e-05	0	1e-05	0	1e-05	0	1e-05	0	1e-05	0	1e-05	0	1e-05	0	1e-05	0	1e-05	0	Others
cpd02431	0.00016	0	0.00019	0	0.00046	0	0.00045	0	0.0001	0	1e-05	0	0.00017	0	0.3881	0.2898	0.75526	0.21849	0.00038	0	0.00038	0	4e-05	0	Others
cpd00288	0.00016	0	0.00036	0	0.00024	0	0.00015	0	0.00022	0	1e-05	0	2e-05	0	2e-05	0	2e-05	0	2e-05	0	2e-05	0	2e-05	0	Others
cpd00094	6e-05	0	4e-05	0	5e-05	0	7e-05	0	0.00011	0	1e-05	0	1e-05	0	1e-05	0	1e-05	0	1e-05	0	1e-05	0	1e-05	0	Others
cpd00428	1e-05	0	1e-05	0	1e-05	0	2e-05	0	1e-05	0	1e-05	0	1e-05	0	1e-05	0	1e-05	0	1e-05	0	1e-05	0	1e-05	0	Others
cpd01982	3e-05	0	5e-05	0	7e-05	0	6e-05	0	2e-05	0	1e-05	0	1e-05	0	1e-05	0	1e-05	0	1e-05	0	1e-05	0	1e-05	0	Others
cpd02642	1e-05	0	2e-05	0	4e-05	0	5e-05	0	0.00011	0	1e-05	0	1e-05	0	1e-05	0	1e-05	0	1e-05	0	1e-05	0	1e-05	0	Others
cpd02884	0.00021	0	8e-05	0	5e-05	0	0.00016	0	5e-05	0	1e-05	0	0.0001	0	0.00125	0	0.00163	0	0.10163	0	0.20163	0	0.05063	0	Others
cpd02498	0.01332	0	0.00279	0	0.00041	0	0.00033	0	0.00025	0	1e-05	0	0.0604	0	0.0604	0	0.0604	0	0.0604	0	0.0604	0	0.0604	0	Others
cpd00712	8e-05	0	8e-05	0	8e-05	0	8e-05	0	3e-05	0	1e-05	0	8e-05	0	8e-05	0	8e-05	0	8e-05	0	8e-05	0	8e-05	0	Others
cpd02300	1e-05	0	1e-05	0	1e-05	0	1e-05	0	1e-05	0	1e-05	0	1e-05	0	1e-05	0	1e-05	0	1e-05	0	1e-05	0	1e-05	0	Others
cpd00229	1e-05	0	1e-05	0	1e-05	0	3e-05	0	4e-05	0	1e-05	0	1e-05	0	1e-05	0	1e-05	0	1e-05	0	1e-05	0	1e-05	0	Others
cpd03480	1e-05	0	1e-05	0	1e-05	0	1e-05	0	1e-05	0	1e-05	0	1e-05	0	1e-05	0	1e-05	0	1e-05	0	1e-05	0	1e-05	0	Others
cpd00464	1e-05	0	1e-05	0	2e-05	0	3e-05	0	2e-05	0	1e-05	0	1e-05	0	1e-05	0	1e-05	0	1e-05	0	1e-05	0	2e-05	0	Others
cpd00223	1e-05	0	1e-05	0	1e-05	0	1e-05	0	1e-05	0	1e-05	0	1e-05	0	1e-05	0	1e-05	0	1e-05	0	1e-05	0	1e-05	0	Others
cpd00343	0.02918	0.02885	0.01663	0.01632	0.00422	0.00372	0.00024	0	6e-05	0	1e-05	0	1e-05	0	1e-05	0	1e-05	0	1e-05	0	1e-05	0	1e-05	0	Others
cpd00147	1e-05	0	1e-05	0	1e-05	0	1e-05	0	2e-05	0	6e-05	0	4e-05	0	3e-05	0	2e-05	0	2e-05	0	1e-05	0	1e-05	0	Others
cpd02574	1e-05	0	1e-05	0	1e-05	0	1e-05	0	2e-05	0	6e-05	0	3e-05	0	2e-05	0	2e-05	0	2e-05	0	1e-05	0	1e-05	0	Others
cpd00285	1e-05	0	1e-05	0	1e-05	0	1e-05	0	1e-05	0	1e-05	0	1e-05	0	1e-05	0	1e-05	0	1e-05	0	1e-05	0	1e-05	0	Others
cpd02069	1e-05	0	1e-05	0	1e-05	0	1e-05	0	1e-05	0	1e-05	0	1e-05	0	1e-05	0	1e-05	0	1e-05	0	1e-05	0	1e-05	0	Others
cpd00853	1e-05	0	1e-05	0	1e-05	0	1e-05	0	1e-05	0	1e-05	0	1e-05	0	1e-05	0	1e-05	0	1e-05	0	1e-05	0	1e-05	0	Others
cpd00449	1e-05	0	1e-05	0	1e-05	0	1e-05	0	1e-05	0	1e-05	0	1e-05	0	1e-05	0	1e-05	0	1e-05	0	1e-05	0	1e-05	0	Others
cpd00213	1e-05	0	1e-05	0	1e-05	0	1e-05	0	1e-05	0	1e-05	0	1e-05	0	1e-05	0	1e-05	0	1e-05	0	1e-05	0	1e-05	0	Others
cpd00836	1e-05	0	1e-05	0	1e-05	0	1e-05	0	1e-05	0	1e-05	0	1e-05	0	1e-05	0	1e-05	0	1e-05	0	1e-05	0	1e-05	0	Others
cpd00715	1e-05	0	1e-05	0	1e-05	0	1e-05	0	1e-05	0	1e-05	0	1e-05	0	1e-05	0	1e-05	0	1e-05	0	1e-05	0	1e-05	0	Others
cpd00932	0.00041	0	7e-05	0	0.00035	0	0.01062	0.00996	0.00733	0.00703	1e-05	0	1e-05	0	1e-05	0	1e-05	0	1e-05	0	1e-05	0	1e-05	0	Others
cpd02182	1e-05	0	1e-05	0	1e-05	0	2e-05	0	2e-05	0	1e-05	0	1e-05	0	1e-05	0	1e-05	0	1e-05	0	1e-05	0	1e-05	0	Others
cpd00346	0.00012	0	0.00014	0	0.00012	0	0.00015	0	0.0001	0	6e-05	0	3e-05	0	2e-05	0	1e-05	0	1e-05	0	1e-05	0	1e-05	0	Others
cpd00231	1e-05	0	1e-05	0	1e-05	0	1e-05	0	1e-05	0	1e-05	0	1e-05	0	1e-05	0	1e-05	0	1e-05	0	1e-05	0	1e-05	0	Others
cpd00150	1e-05	0	1e-05	0	1e-05	0	1e-05	0	1e-05	0	1e-05	0	1e-05	0	1e-05	0	1e-05	0	1e-05	0	1e-05	0	1e-05	0	Others
cpd01211	1e-05	0	1e-05	0	1e-05	0	1e-05	0	1e-05	0	1e-05	0	1e-05	0	1e-05	0	1e-05	0	1e-05	0	1e-05	0	1e-05	0	Others
cpd02234	1e-05	0	1e-05	0	1e-05	0	1e-05	0	1e-05	0	1e-05	0	1e-05	0	1e-05	0	1e-05	0	1e-05	0	1e-05	0	1e-05	0	Others
cpd00434	1e-05	0	1e-05	0	1e-05	0	1e-05	0	1e-05	0	1e-05	0	1e-05	0	1e-05	0	1e-05	0	1e-05	0	1e-05	0	1e-05	0	Others
cpd00876	1e-05	0	1e-05	0	1e-05	0	1e-05	0	1e-05	0	1e-05	0	1e-05	0	1e-05	0	1e-05	0	1e-05	0	1e-05	0	1e-05	0	Others
cpd00287	1e-05	0	1e-05	0	1e-05	0	1e-05	0	1e-05	0	1e-05	0	1e-05	0	1e-05	0	1e-05	0	1e-05	0	1e-05	0	1e-05	0	Others
cpd03671	1e-05	0	5e-05	0	6e-05	0	5e-05	0	0.00022	0	0.00037	0.00016	0.00037	0.00016	0.00037	0.00016	0.00037	0.00016	0.00037	0.00016	0.00037	0.00016	0.00037	0.00016	Others
cpd00508	0.00017	0	0.00016	0	0.00041	0	0.00167	0	0.00025	0	1e-05	0	1e-05	0	1e-05	0	1e-05	0	1e-05	0	1e-05	0	1e-05	0	Others
cpd00683	1e-05	0	1e-05	0	1e-05	0	2e-05	0	4e-05	0	1e-05	0	1e-05	0	1e-05	0	1e-05	0	1e-05	0	1e-05	0	1e-05	0	Others
cpd02345	4e-05	0	5e-05	0	9e-05	0	8e-05	0	5e-05	0	1e-05	0	1e-05	0	1e-05	0	1e-05	0	1e-05	0	1e-05	0	1e-05	0	Others
cpd00918	2e-05	0	2e-05	0	2e-05	0	2e-05	0	2e-05	0	2e-05	0	2e-05	0	2e-05	0	2e-05	0	2e-05	0	2e-05	0	1e-05	0	Others
cpd02120	9e-05	0	4e-05	0	3e-05	0	4e-05	0	6e-05	0	4e-05	0	5e-05	0	4e-05	0	3e-05	0	3e-05	0	2e-05	0	1e-05	0	Others
cpd00626	1e-05	0	1e-05	0	1e-05	0	1e-05	0	1e-05	0	1e-05	0	1e-05	0	1e-05	0	1e-05	0	1e-05	0	1e-05	0	1e-05	0	Others
cpd02210	1e-05	0	1e-05	0	3e-05	0	4e-05	0	6e-05	0	8e-05	0	4e-05	0	3e-05	0	2e-05	0	2e-05	0	1e-05	0	1e-05	0	Others
cpd00383	0.00022	0	0.00011	0	0.00012	0	7e-05	0	5e-05	0	1e-05	0	1e-05	0	1e-05	0	1e-05	0	1e-05	0	1e-05	0	1e-05	0	Others
cpd02030	0.00013	0	7e-05	0	0.00011	0	8e-05	0	8e-05	0	1e-05	0	1e-05	0	1e-05	0	1e-05	0	1e-05	0	1e-05	0	1e-05	0	Others
cpd01716	0.00017	0	0.00012	0	0.00017	0	8e-05	0	7e-05	0	1e-05	0	1e-05	0	1e-05	0	1e-05	0	1e-05	0	1e-05	0	1e-05	0	Others
cpd01725	1e-05	0	1e-05	0	1e-05	0	1e-05	0	1e-05	0	1e-05	0	1e-05	0	1e-05	0	1e-05	0	1e-05	0	1e-05	0	1e-05	0	Others
cpd00408	8e-05	0	8e-05	0	8e-05	0	7e-05	0	3e-05	0	1e-05	0	8e-05	0	8e-05	0	8e-05	0	8e-05	0	8e-05	0	8e-05	0	Others
cpd00644	8e-05	0	8e-05	0	8e-05	0	8e-05	0	8e-05	0	1e-05	0	1e-05	0	1e-05	0	1e-05	0	1e-05	0	1e-05	0	1e-05	0	Others
cpd00430	1e-05	0	1e-05	0	2e-05	0	3e-05	0	2e-05	0	1e-05	0	1e-05	0	1e-05	0	1e-05	0	1e-05	0	1e-05	0	1e-05	0	Others
cpd01647	1e-05	0	1e-05	0	1e-05	0	1e-05	0	1e-05	0	1e-05	0	1e-05	0	1e-05	0	1e-05	0	1e-05	0	1e-05	0	1e-05	0	Others
cpd02552	2e-05	0	2e-05	0	2e-05	0	2e-05	0	2e-05	0	1e-05	0	2e-05	0	2e-05	0	2e-05	0	2e-05	0	2e-05	0	2e-05	0	Others
cpd00486	1e-05	0	1e-05	0	1e-05	0	1e-05	0	1e-05	0	1e-05	0	1e-05	0	1e-05	0	1e-05	0	1e-05	0	1e-05	0	1e-05	0	Others
cpd00703	1e-05	0	1e-05	0	1e-05	0	1e-05	0	1e-05	0	1e-05	0	1e-05	0	1e-05	0	1e-05	0	1e-05	0	1e-05	0	1e-05	0	Others
cpd02698	0.0174	0.01723	0.01717	0.01633	0.01414	0.01362	0.01407	0.01237	0.0006	0	6e-05	0	0.00032	0	0.00032	0	0.00032	0	0.00022	0	0.00022	0	1e-05	0	Others
cpd00504	7e-05	0	6e-05	0	4e-05	0	4e-05	0	0.0001	0	0.00056	0	0.00056	0	0.00056	0	0.00056	0	0.00056	0	0.00056	0	1e-05	0	Others
cpd00521	1e-05	0	1e-05	0	1e-05	0	1e-05	0	1e-05	0	1e-05	0	1e-05	0	1e-05	0	1e-05	0	1e-05	0	1e-05	0	1e-05	0	Others
cpd00522	1e-05	0	1e-05	0	1e-05	0	1e-05	0	1e-05	0	1e-05	0	1e-05	0	1e-05	0	1e-05	0	1e-05	0	1e-05	0	1e-05	0	Others
cpd02113	1e-05	0	1e-05	0	1e-05	0	1e-05	0	1e-05	0	1e-05	0	1e-05	0	1e-05	0	1e-05	0	1e-05	0	1e-05	0	1e-05	0	Others
cpd00890	1e-05	0	0.00015	0	5e-05	0	2e-05	0	1e-05	0	1e-05	0	1e-05	0	1e-05	0	1e-05	0	1e-05	0	1e-05	0	1e-05	0	Others
cpd00525	1e-05	0	0.0006	0	0.0001	0	4e-05	0	2e-05	0	1e-05	0	1e-05	0	1e-05	0	1e-05	0	1e-05	0	1e-05	0	1e-05	0	Others
cpd02964	1e-05	0	0.00011	0	9e-05	0	4e-05	0	2e-05	0	1e-05	0	1e-05	0	1e-05	0	1e-05	0	1e-05	0	1e-05	0	1e-05	0	Others
cpd00807	1e-05	0	1e-05	0	2e-05	0	7e-05	0	0.00034	0	1e-05	0	1e-05	0	1e-05	0	1e-05	0	1e-05	0	1e-05	0	1e-05	0	Others
cpd00834	1e-05	0	2e-05	0	4e-05	0	8e-05	0	5e-05	0	1e-05	0	1e-05	0	1e-05	0	1e-05	0	1e-05	0	1e-05	0	1e-05	0	Others
cpd00443	1e-05	0	1e-05	0	2e-05	0	3e-05	0	8e-05	0	1e-05	0	1e-05	0	1e-05	0	1e-05	0	1e-05	0	1e-05	0	1e-05	0	Others
cpd00954	1e-05	0	1e-05	0	2e-05	0	2e-05	0	3e-05	0	1e-05	0	1e-05	0	1e-05	0	1e-05	0	1e-05	0	1e-05	0	1e-05	0	Others
cpd00764	1e-05	0	1e-05	0	1e-05	0	1e-05	0	1e-05	0	1e-05	0	1e-05	0	1e-05	0	1e-05	0	1e-05	0	1e-05	0	1e-05	0	Others
cpd01311	1e-05	0	1e-05	0	1e-05	0	1e-05	0	1e-05	0	1e-05	0	1e-05	0	1e-05	0	1e-05	0	1e-05	0	1e-05	0	1e-05	0	Others
cpd02140	1e-05	0	1e-05	0	3e-05	0	0.00022	0	3e-05	0	2e-05	0	1e-05	0	1e-05	0	1e-05	0	1e-05	0	1e-05	0	2e-05	0	Others
cpd02893	2e-05	0	2e-05	0	9e-05	0	7e-05	0	4e-05	0	1e-05	0	2e-05	0	2e-05	0	2e-05	0	2e-05	0	2e-05	0	1e-05	0	Others
cpd02724	0.00017	0	0.00016	0	0.00041	0	0.00167	0	0.01405	0.01343	0.00032	0	0.00011	0	0.00032	0	0.00032	0	0.00032	0	0.00032	0	1e-05	0	Others
cpd02851	1e-05	0	2e-05	0	7e-05	0	7e-05	0	4e-05	0	1e-05	0	1e-05	0	1e-05	0	1e-05	0	1e-05	0	1e-05	0	1e-05	0	Others
cpd02921	2e-05	0	2e-05	0	0.00025	0	0.00314	0.00183	8e-05	0	1e-05	0	1e-05	0	1e-05	0	1e-05	0	1e-05	0	1e-05	0	1e-05	0	Others
cpd08288	2e-05	0	3e-05	0	0.00019	0	0.0046	0.00097	0.0046	0.00101	1e-05	0	1e-05	0	1e-05	0	1e-05	0	1e-05	0	1e-05	0	1e-05	0	Others
cpd00204	1e-05	0	1e-05	0	1e-05	0	1e-05	0	1e-05	0	1e-05	0	1e-05	0	1e-05	0	1e-05	0	1e-05	0	1e-05	0	1e-05	0	Others
cpd14613	1e-05	0	1e-05	0	2e-05	0	4e-05	0	5e-05	0	4e-05	0	4e-05	0	4e-05	0	4e-05	0	4e-05	0	4e-05	0	1e-05	0	Others
cpd02506	1e-05	0	1e-05	0	1e-05	0	1e-05	0	1e-05	0	1e-05	0	1e-05	0	1e-05	0	1e-05	0	1e-05	0	1e-05	0	1e-05	0	Others
cpd08928	3e-05	0	3e-05	0	3e-05	0	3e-05	0	3e-05	0	1e-05	0	1e-05	0	1e-05	0	1e-05	0	1e-05	0	1e-05	0	1e-05	0	Others
cpd02904	1e-05	0	1e-05	0	3e-05	0	4e-05	0	4e-05	0	1e-05	0	1e-05	0	1e-05	0	1e-05	0	1e-05	0	1e-05	0	1e-05	0	Others
cpd01881	1e-05	0	1e-05	0	1e-05	0	1e-05	0	1e-05	0	1e-05	0	1e-05	0	1e-05	0	1e-05	0	1e-05	0	1e-05	0	1e-05	0	Others
cpd01973	1e-05	0	1e-05	0	1e-05	0	1e-05	0	1e-05	0	1e-05	0	1e-05	0	1e-05	0	1e-05	0	1e-05	0	1e-05	0	1e-05	0	Others
cpd01974	1e-05	0	1e-05	0	1e-05	0	1e-05	0	1e-05	0	1e-05	0	1e-05	0	1e-05	0	1e-05	0	1e-05	0	1e-05	0	1e-05	0	Others
cpd02843	1e-05	0	1e-05	0	2e-05	0	7e-05	0	0.00077	0	1e-05	0	1e-05	0	1e-05	0	1e-05	0	1e-05	0	1e-05	0	1e-05	0	Others
cpd00931	1e-05	0	1e-05	0	1e-05	0	2e-05	0	4e-05	0	1e-05	0	1e-05	0	1e-05	0	1e-05	0	1e-05	0	1e-05	0	1e-05	0	Others
cpd02720	1e-05	0	1e-05	0	1e-05	0	2e-05	0	4e-05	0	1e-05	0	1e-05	0	1e-05	0	1e-05	0	1e-05	0	1e-05	0	1e-05	0	Others
cpd02961	1e-05	0	1e-05	0	2e-05	0	3e-05	0	4e-05	0	1e-05	0	1e-05	0	1e-05	0	1e-05	0	1e-05	0	1e-05	0	1e-05	0	Others
cpd00956	1e-05	0	2e-05	0	4e-05	0	5e-05	0	0.00011	0	1e-05	0	1e-05	0	1e-05	0	1e-05	0	1e-05	0	1e-05	0	1e-05	0	Others
cpd00976	1e-05	0	1e-05	0	1e-05	0	1e-05	0	1e-05	0	1e-05	0	1e-05	0	1e-05	0	1e-05	0	1e-05	0	1e-05	0	1e-05	0	Others
cpd01772	1e-05	0	1e-05	0	3e-05	0	8e-05	0	0.0001	0	1e-05	0	1e-05	0	1e-05	0	1e-05	0	1e-05	0	1e-05	0	1e-05	0	Others
cpd02021	1e-05	0	1e-05	0	2e-05	0	8e-05	0	9e-05	0	1e-05	0	1e-05	0	1e-05	0	1e-05	0	1e-05	0	1e-05	0	1e-05	0	Others
cpd01777	1e-05	0	2e-05	0	3e-05	0	8e-05	0	8e-05	0	1e-05	0	1e-05	0	1e-05	0	1e-05	0	1e-05	0	1e-05	0	1e-05	0	Others
cpd02979	1e-05	0	2e-05	0	3e-05	0	8e-05	0	8e-05	0	1e-05	0	1e-05	0	1e-05	0	1e-05	0	1e-05	0	1e-05	0	1e-05	0	Others
cpd03052	1e-05	0	1e-05	0	1e-05	0	1e-05	0	1e-05	0	1e-05	0	1e-05	0	1e-05	0	1e-05	0	1e-05	0	1e-05	0	1e-05	0	Others
cpd02295	1e-05	0	1e-05	0	2e-05	0	4e-05	0	9e-05	0	1e-05	0	1e-05	0	1e-05	0	1e-05	0	1e-05	0	1e-05	0	1e-05	0	Others
cpd02465	6e-05	0	4e-05	0	3e-05	0	4e-05	0	5e-05	0	6e-05	0	5e-05	0	4e-05	0	3e-05	0	3e-05	0	2e-05	0	1e-05	0	Others
cpd02315	1e-05	0	1e-05	0	1e-05	0	1e-05	0	1e-05	0	1e-05	0	1e-05	0	1e-05	0	1e-05	0	1e-05	0	1e-05	0	1e-05	0	Others
cpd02791	1e-05	0	1e-05	0	1e-05	0	1e-05	0	2e-05	0	6e-05	0	3e-05	0	2e-05	0	2e-05	0	2e-05	0	1e-05	0	1e-05	0	Others
cpd02861	1e-05	0	1e-05	0	1e-05	0	1e-05	0	1e-05	0	1e-05	0	1e-05	0	1e-05	0	1e-05	0	1e-05	0	1e-05	0	1e-05	0	Others
cpd03897	1e-05	0	1e-05	0	1e-05	0	1e-05	0	1e-05	0	1e-05	0	1e-05	0	1e-05	0	1e-05	0	1e-05	0	1e-05	0	1e-05	0	Others
cpd08286	5e-05	0	9e-05	0	0.00046	0	0.0001	0	7e-05	0	1e-05	0	2e-05	0	2e-05	0	2e-05	0	2e-05	0	3e-05	0	4e-05	0	Others
cpd08287	3e-05	0	4e-05	0	0.00024	0	0.00045	0	0.00012	0	1e-05	0	1e-05	0	1e-05	0	1e-05	0	1e-05	0	1e-05	0	1e-05	0	Others
cpd08289	6e-05	0	0.00013	0	0.0046	0.00081	0.00013	0	0.0001	0	1e-05	0	2e-05	0	2e-05	0	2e-05	0	3e-05	0	3e-05	0	4e-05	0	Others
cpd08358	4e-05	0	3e-05	0	0.00011	0	0.00044	0	0.00016	0	1e-05	0	2e-05	0	2e-05	0	2e-05	0	2e-05	0	2e-05	0	1e-05	0	Others
cpd02547	1e-05	0	1e-05	0	2e-05	0	3e-05	0	3e-05	0	1e-05	0	1e-05	0	1e-05	0	1e-05	0	1e-05	0	1e-05	0	1e-05	0	Others
cpd03091	1e-05	0	1e-05	0	1e-05	0	1e-05	0	1e-05	0	1e-05	0	1e-05	0	1e-05	0	1e-05	0	1e-05	0	1e-05	0	1e-05	0	Others
cpd00371	1e-05	0	1e-05	0	1e-05	0	1e-05	0	1e-05	0	1e-05	0	1e-05	0	1e-05	0	1e-05	0	1e-05	0	1e-05	0	1e-05	0	Others
argLaspL	1e-05	0	1e-05	0	1e-05	0	1e-05	0	1e-05	0	1e-05	0	1e-05	0	1e-05	0	1e-05	0	1e-05	0	1e-05	0	1e-05	0	Others
cpdR-D-D	1e-05	0	1e-05	0	1e-05	0	1e-05	0	1e-05	0	1e-05	0	1e-05	0	1e-05	0	1e-05	0	1e-05	0	1e-05	0	1e-05	0	Others
dialurate	1e-05	0	1e-05	0	2e-05	0	3e-05	0	3e-05	0	3e-05	0	2e-05	0	2e-05	0	1e-05	0	1e-05	0	1e-05	0	1e-05	0	Others
cpd01449	0.10386	0.10383	0.08437	0.08435	0.05872	0.05869	0.03723	0.03721	0.01836	0.01833	1e-05	0	1e-05	0	2e-05	0	2e-05	0	3e-05	0	6e-05	0	0.12624	0.12621	Others
cpd02132	1e-05	0	1e-05	0	1e-05	0	1e-05	0	1e-05	0	1e-05	0	1e-05	0	1e-05	0	1e-05	0	1e-05	0	1e-05	0	1e-05	0	Others
Note: All metabolite IDs have been taken from modelSEED [1] and are also available for reference in supplementary text 5
Reference
[1] Henry CS, Dejongh M, Best AA, Frybarger PM, Linsay B, Stevens RL. High-throughput generation, optimization and analysis of genome-scale metabolic models. Nat Biotechnol 2010. doi:10.1038/nbt.1672.
